# Supplementary material for: Spatial and temporal homogeneity of driver mutations in diffuse intrinsic pontine glioma
Source: PubMed Central journal article supplement (PMC4823825; doi:10.1038/ncomms11185), 2016-04-06
Supplement: ncomms11185-s1.pdf [file ncomms11185-s1.pdf]

## Supplementary Figure 1

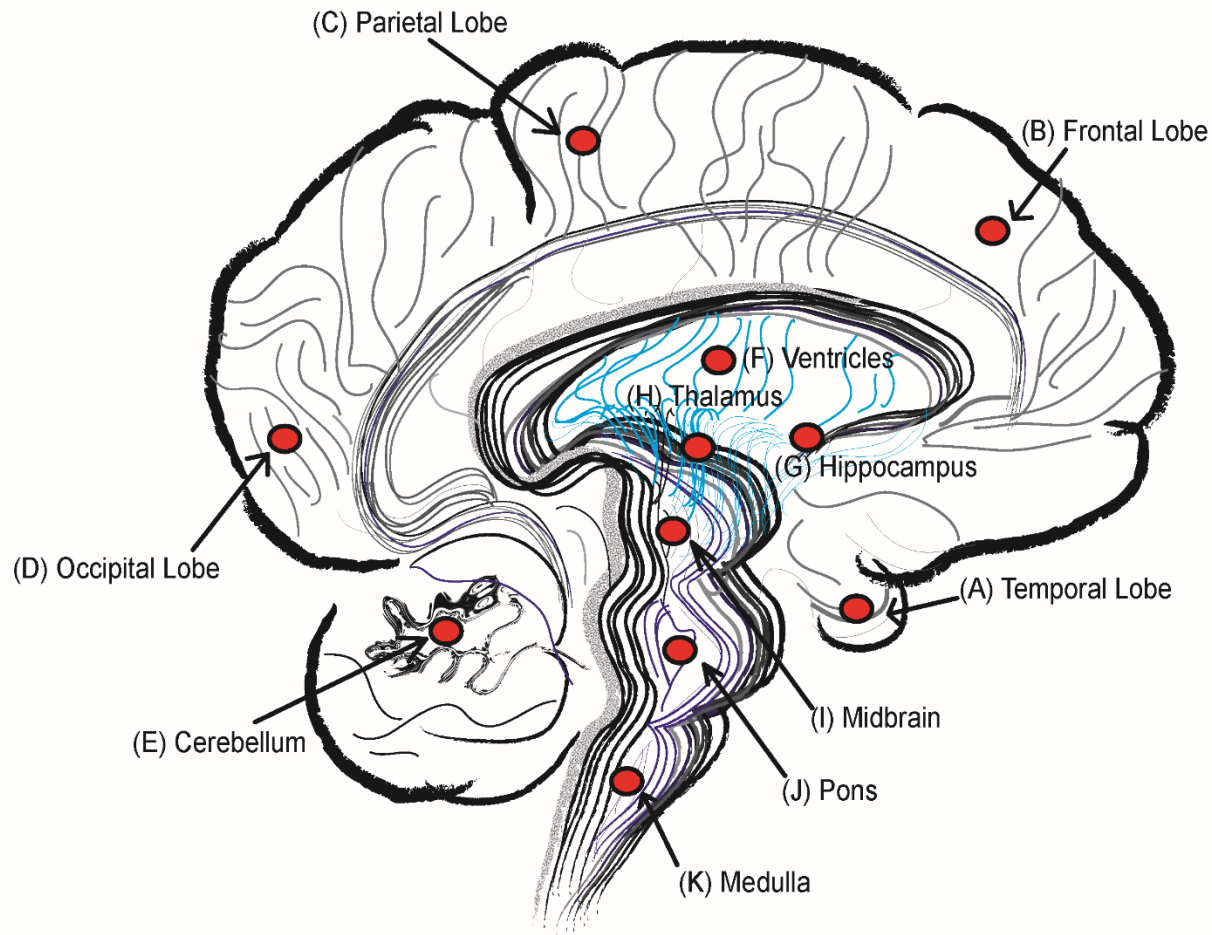

**Supplementary Figure 1. Core punch sampling of whole autopsy brains.** An average of 6 core punch samples from right and left brainstem (midbrain, pons, medulla) and an average of 10 core punch samples from right and left cerebellum and cerebrum (frontal lobe, parietal lobe, temporal lobe, occipital lobe, lateral ventricles, thalamus, hippocampus) were collected for molecular analyses from frozen and formalin fixed paraffin embedded (FFPE) whole autopsy brains from nine DIPG patients (N=134).

Supplementary Figure 2

(a) DIPG1 (21y 2m; Male; H3.1 K27M)

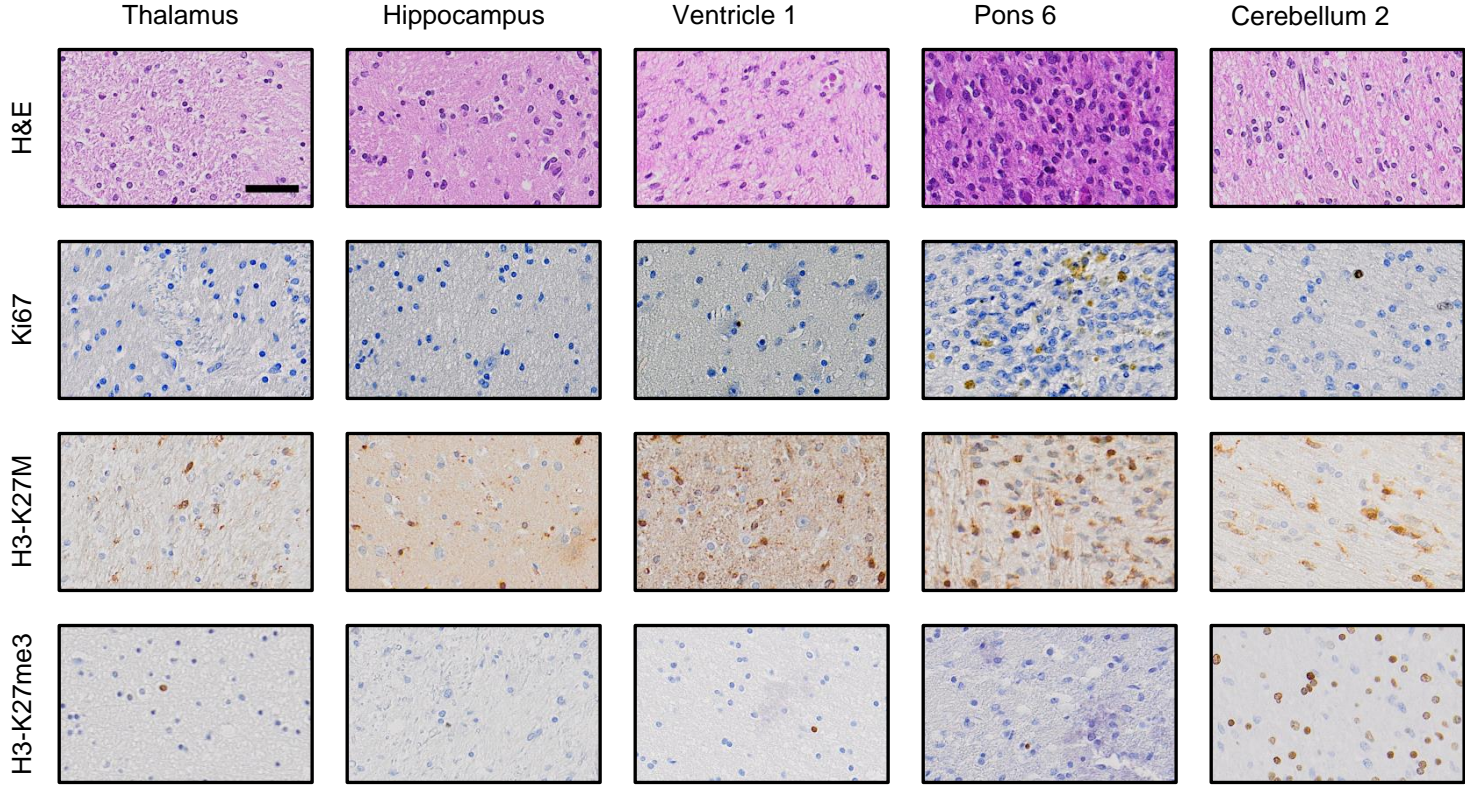



**(b) DIPG2 (6y 10m; Male; H3.1 K27M)**

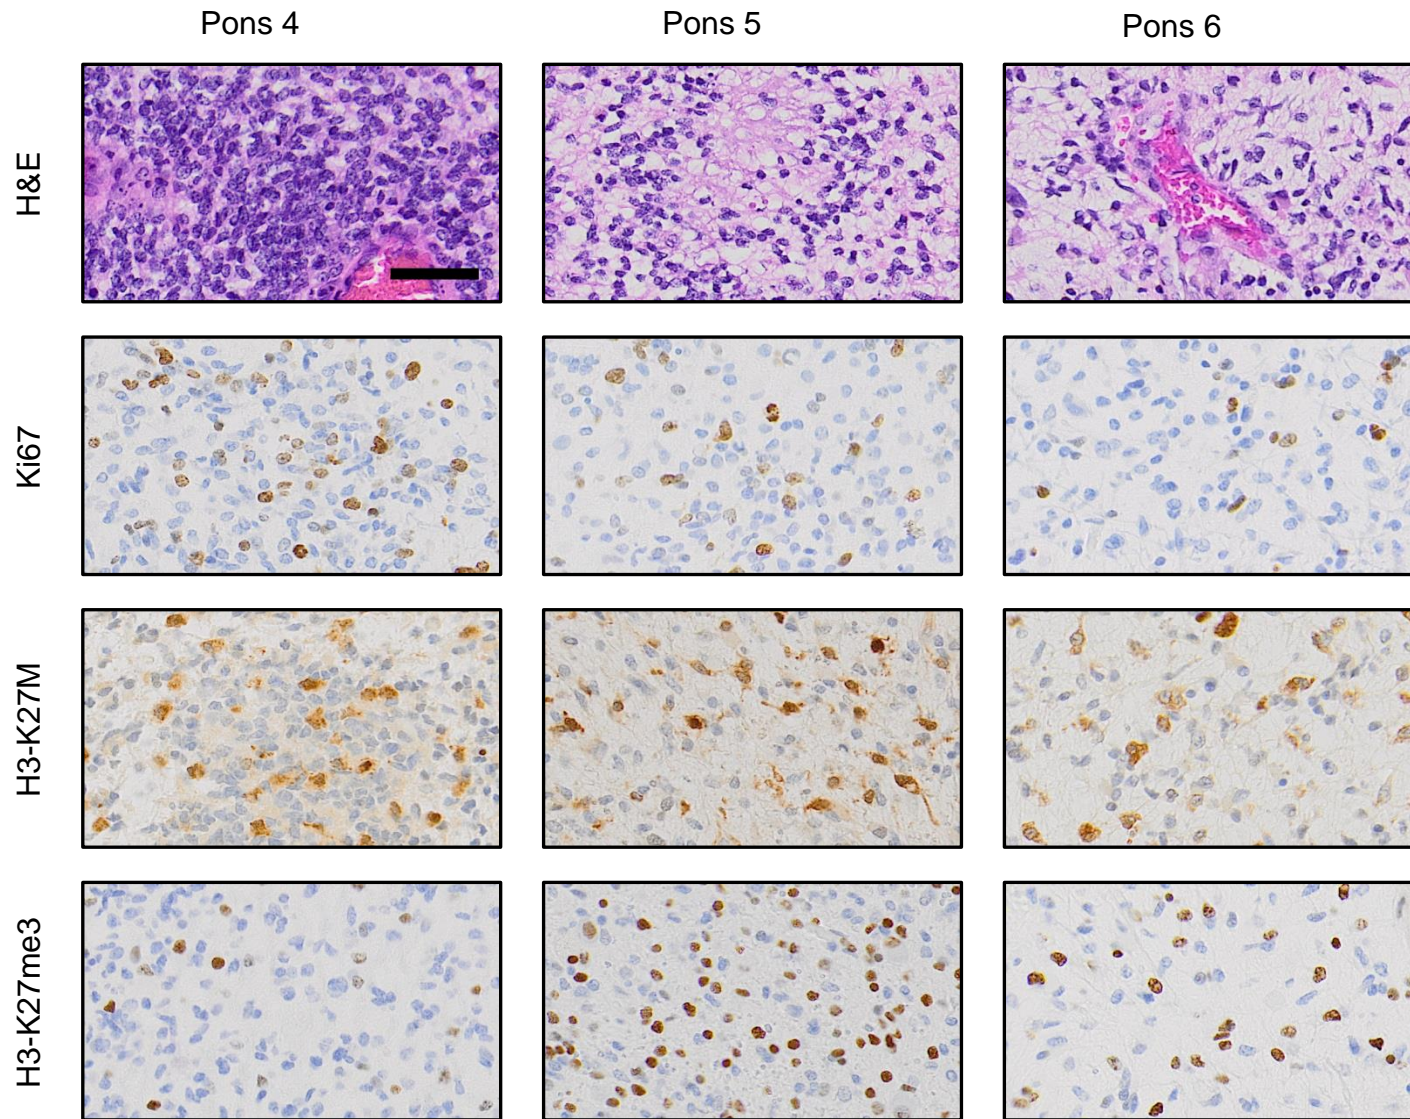



**(c) DIPG7; 10y 8m; Female; H3.3 K27M**

**Tumor Locations**

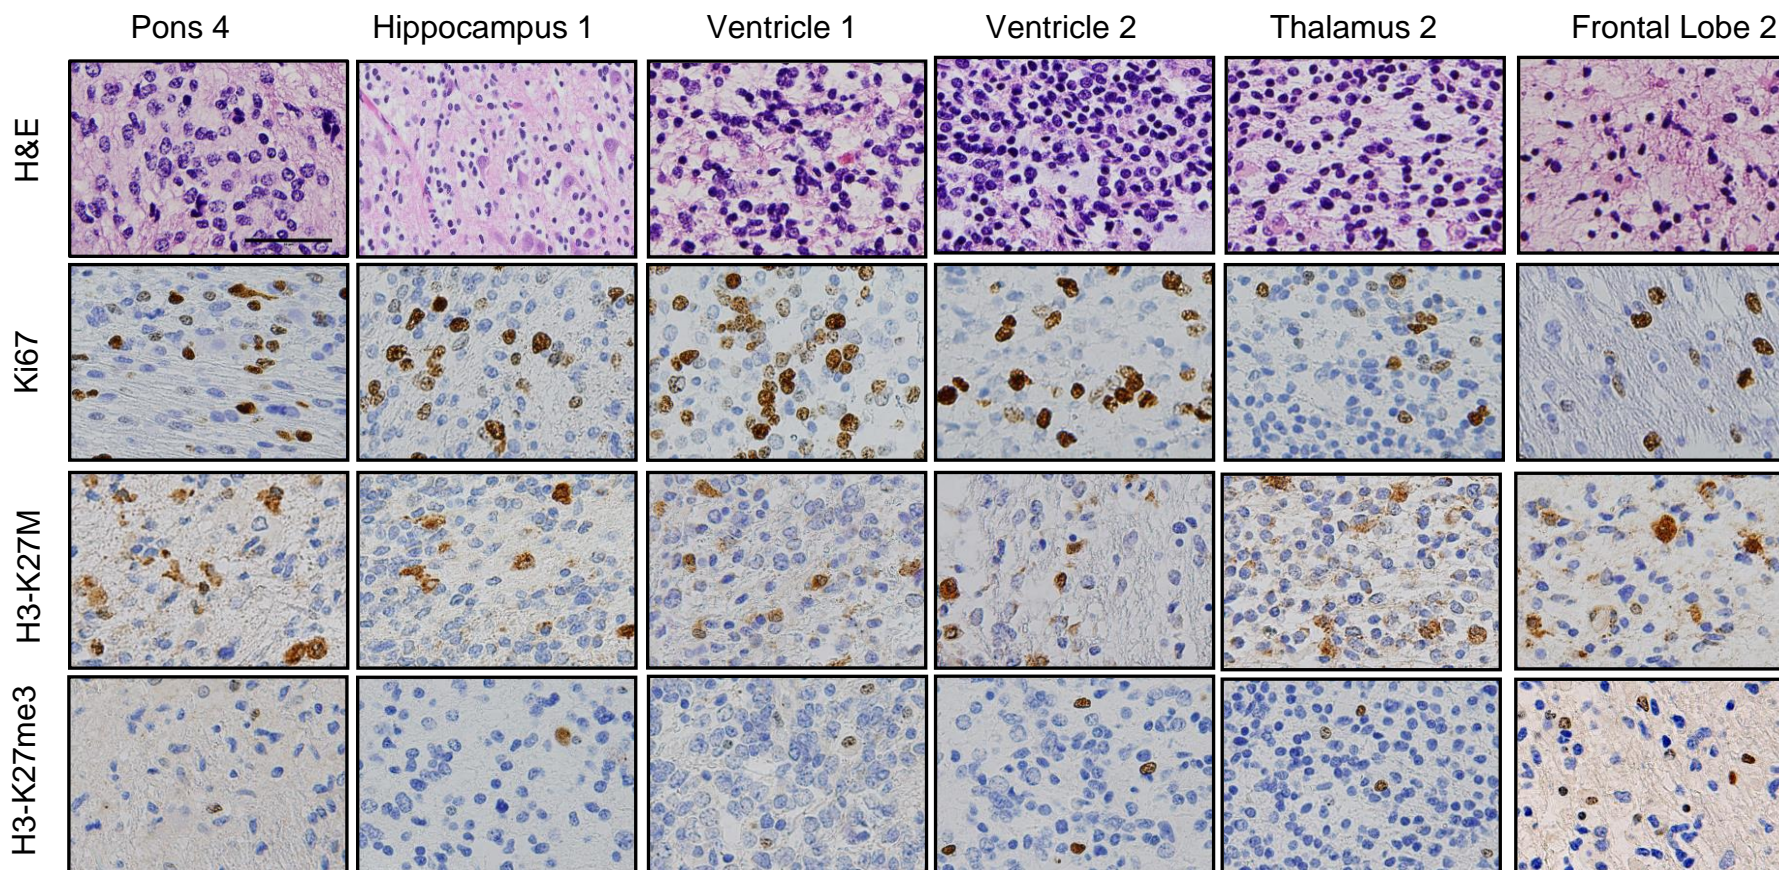

**Normal Locations**

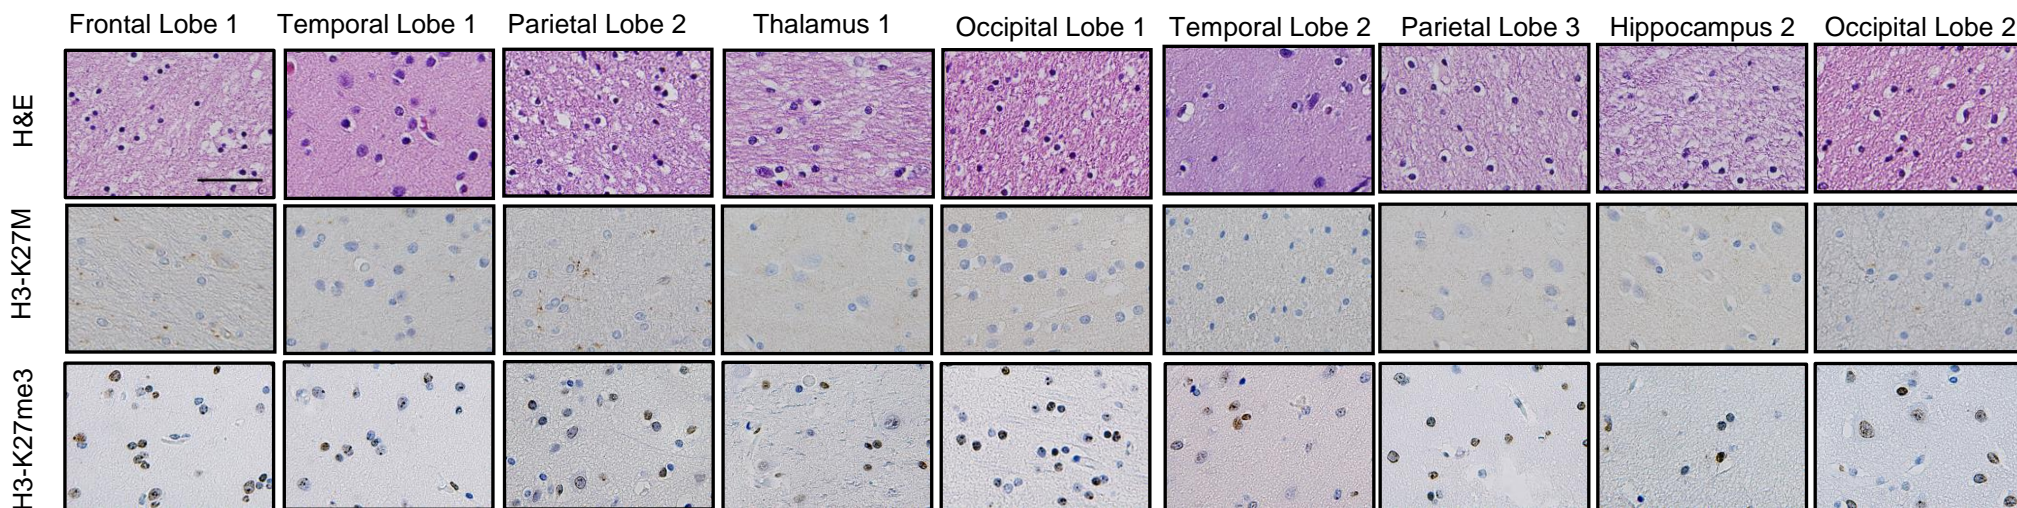



**(d) DIPG8 (5y; Male; H3.3 K27M)**

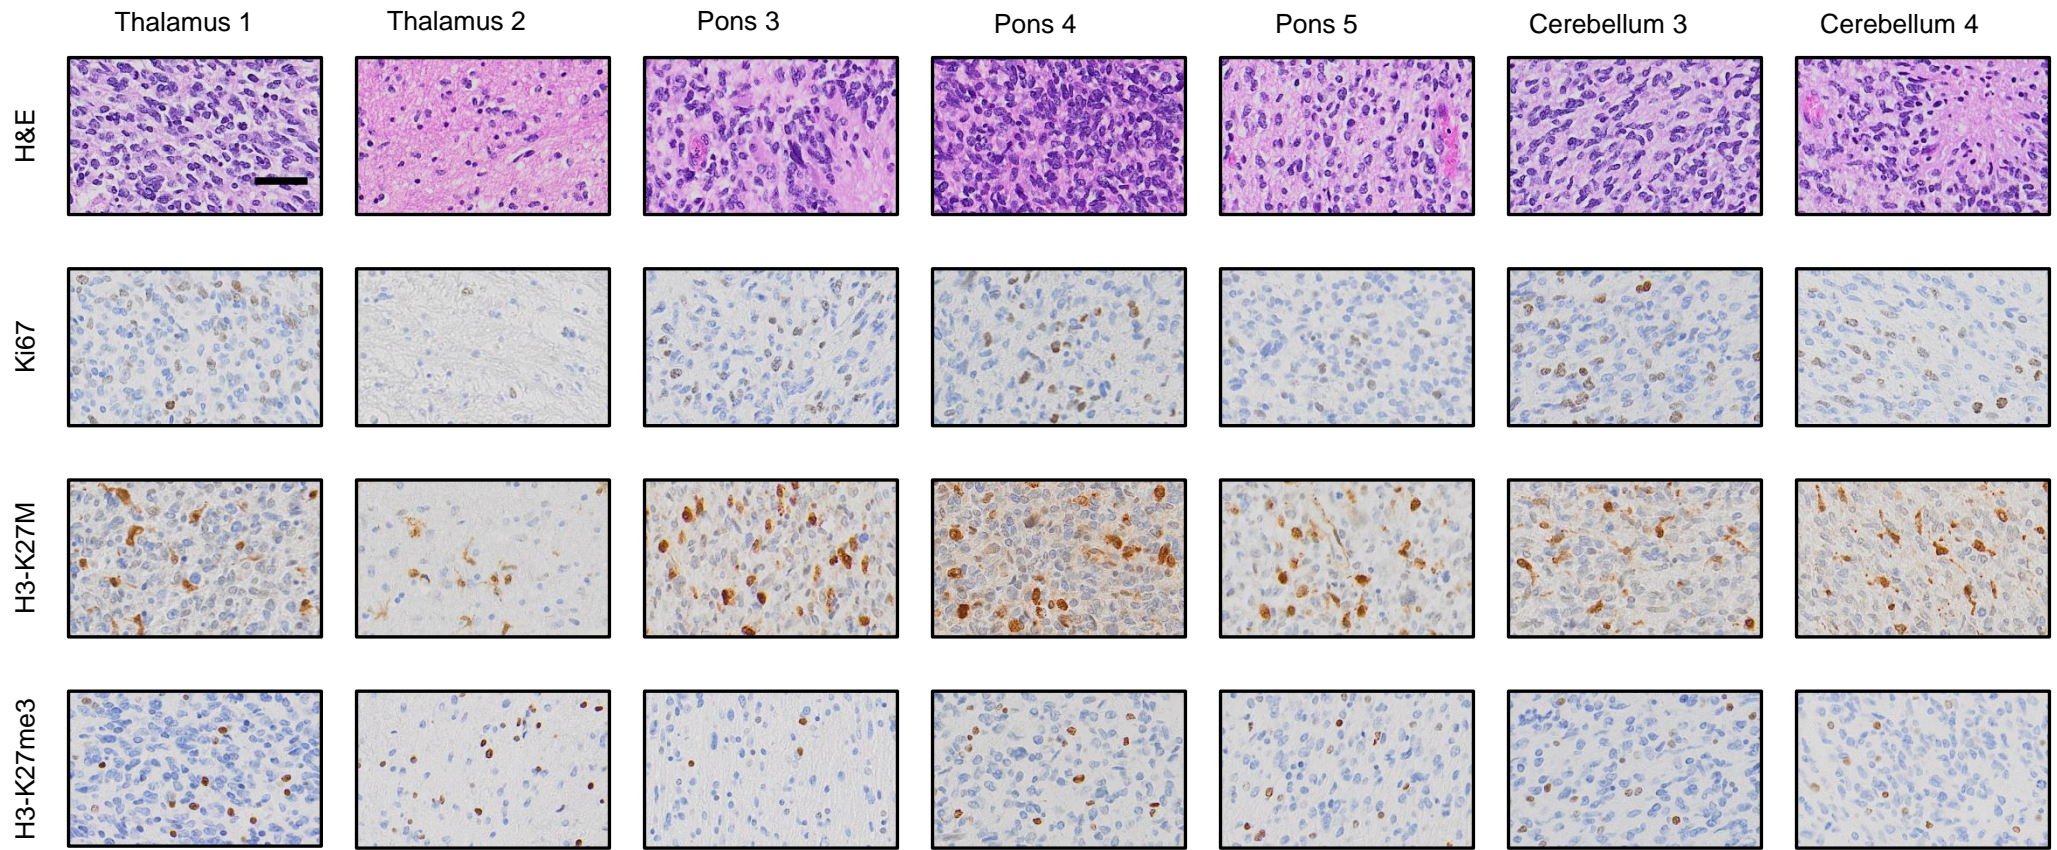



**(e) DIPG9 (9y 3m; Male; H3.3 K27M)**

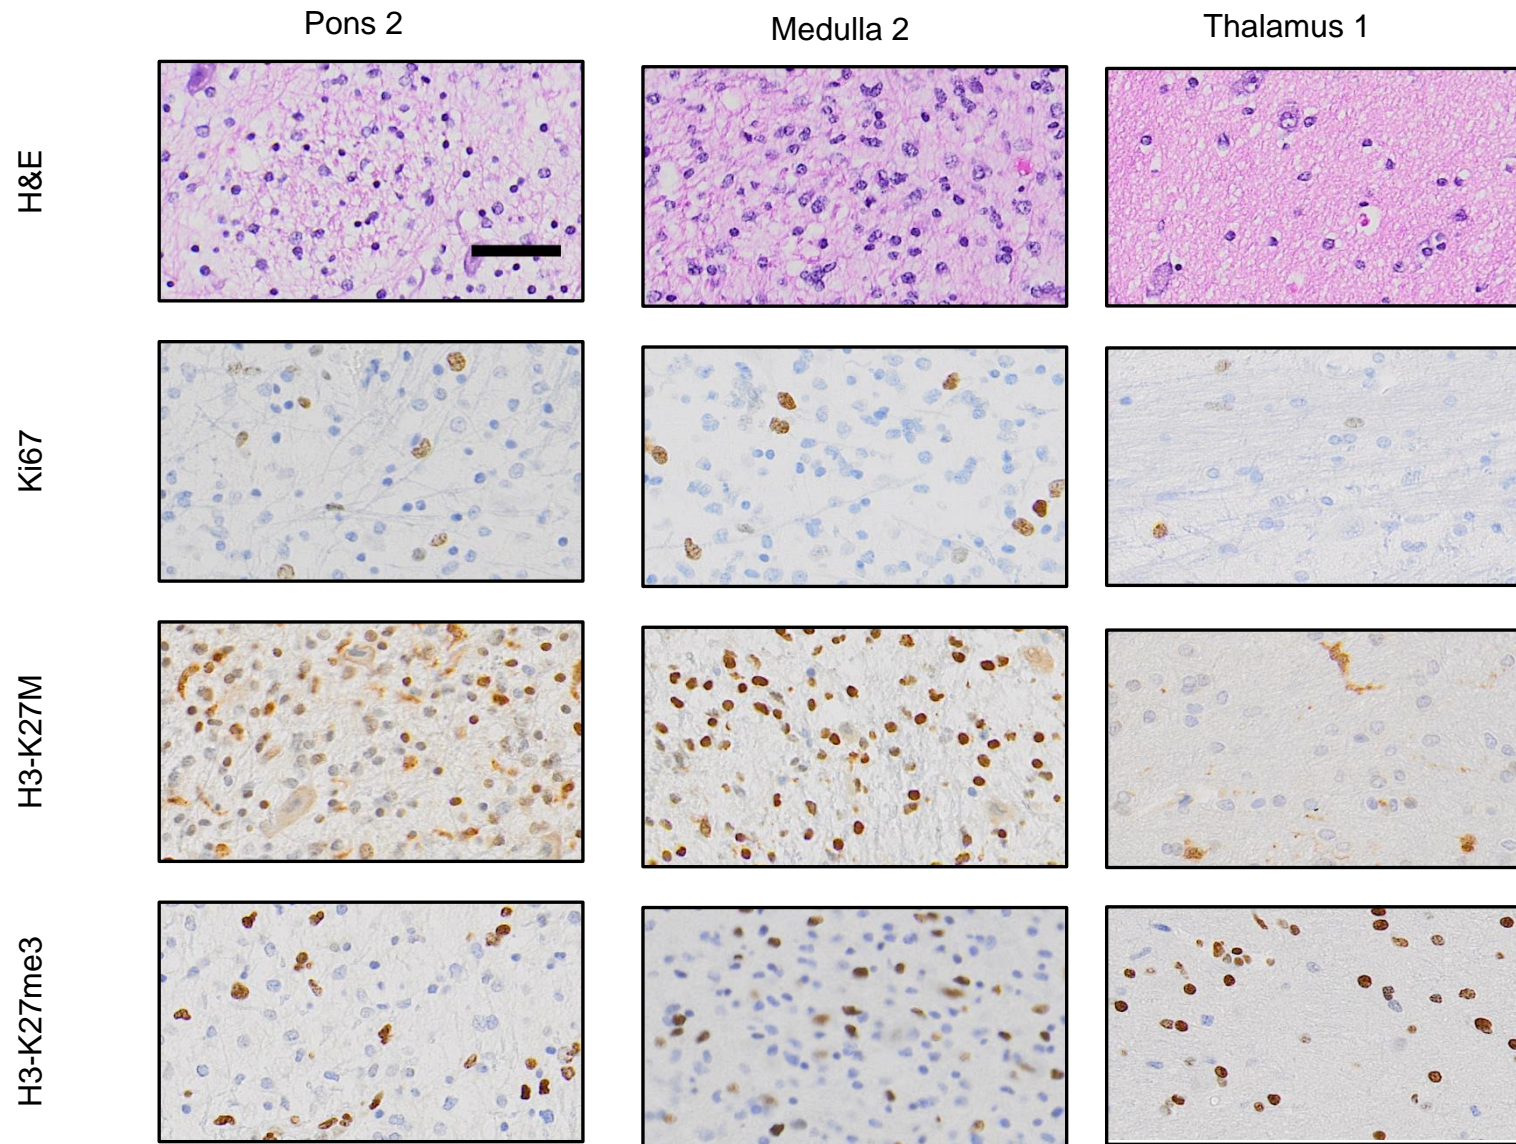

**Supplementary Figure 2. Immunohistochemical staining of several neuroanatomical locations in DIPG autopsies.** Histological sections were probed for Ki67 (proliferation marker), histone 3 K27M mutant (H3-K27M), and histone 3 K27 trimethylation (H3-K27me3) stains in (a) DIPG1 (b) DIPG2 (c) DIPG7 tumor (top) and normal (bottom) (d) DIPG8 and (e) DIPG9. Patient age, gender, and histone 3 mutation status are indicated above each histological staining panel. Tumor spread is seen in proximal (cerebellum and medulla) and distant (thalamus and frontal lobe) brain locations from the primary tumor in the pons. In DIPG9 (e) the area showing normal histology had tumor infiltrate as seen using the specific anti-H3K27M staining or in our molecular studies (Supplementary Table 1). Staining performed on several areas from normal brain DIPG7 (c, bottom) shows no unspecific anti-H3K27M staining in concordance with molecular results (Supplementary Table 1). *Scale bar: 50 $\mu$ m.*



### Supplementary Figure 3

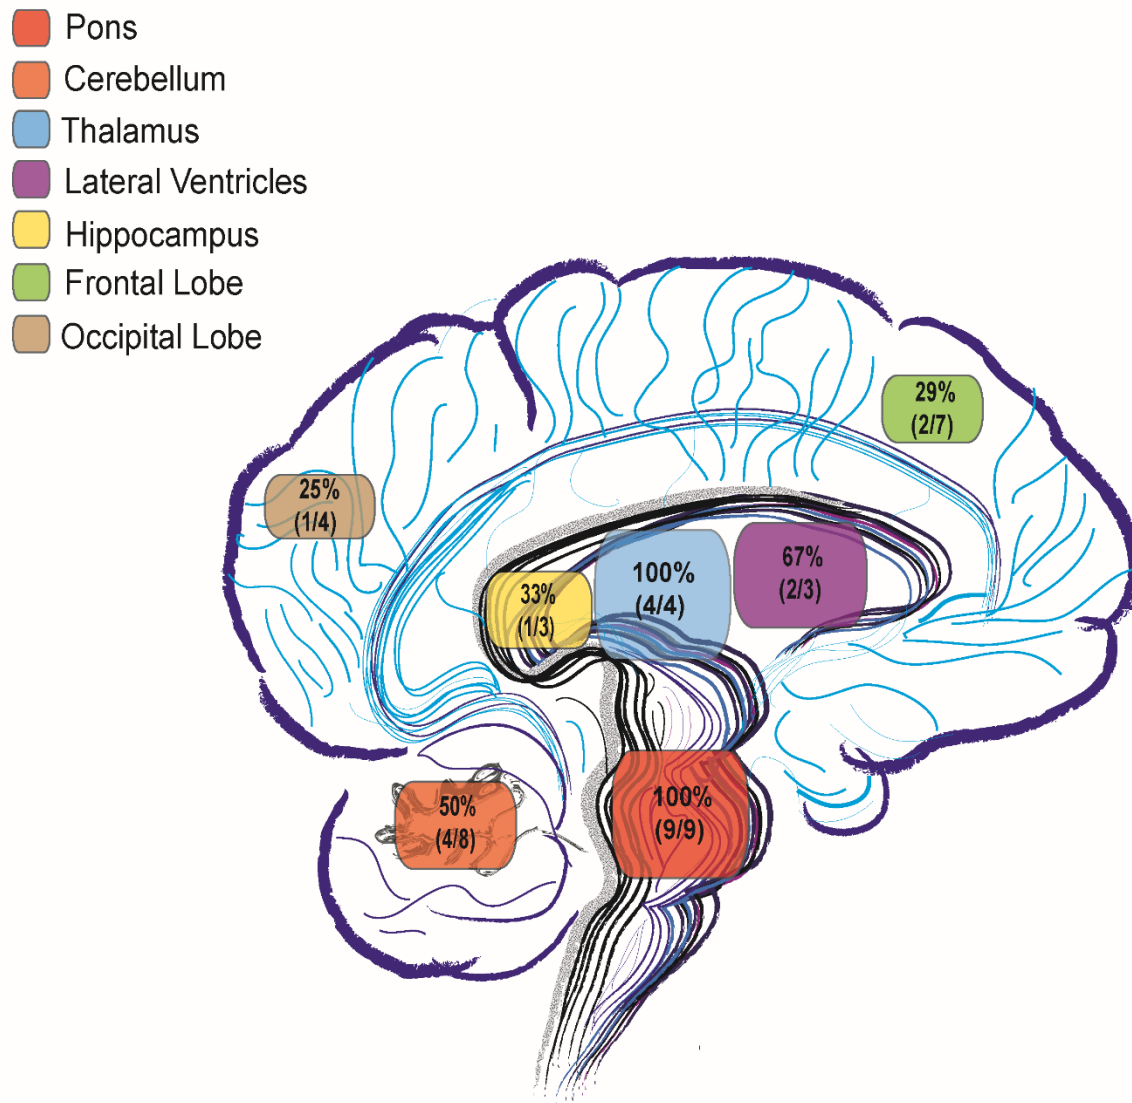

**Supplementary Figure 3. Tumor extension in DIPGs.** Neuroanatomical location and percent frequency of tumor extension from pons to the cerebellum, thalamus, lateral ventricles, hippocampus, frontal and occipital lobes (color key on left) in brains from nine DIPG patients. Tumor extension was detected by the presence of H3-K27M driver mutation assessed by whole exome sequencing, MiSeq targeted sequencing, and digital droplet PCR molecular analyses. Numbers in parentheses represent the percentage of tumor extension (number of patients with tumor extension/number of patients analyzed).



## Supplementary Figure 4

(A)

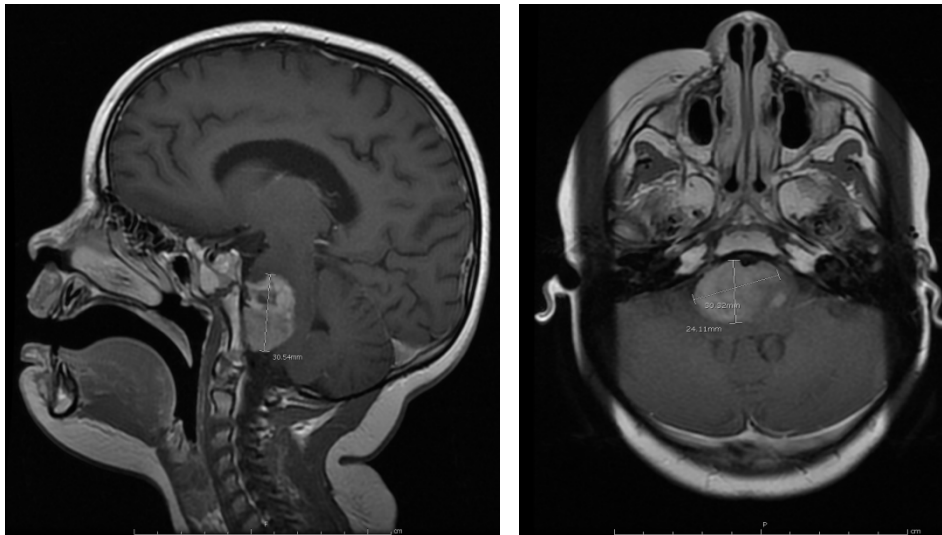

(B)

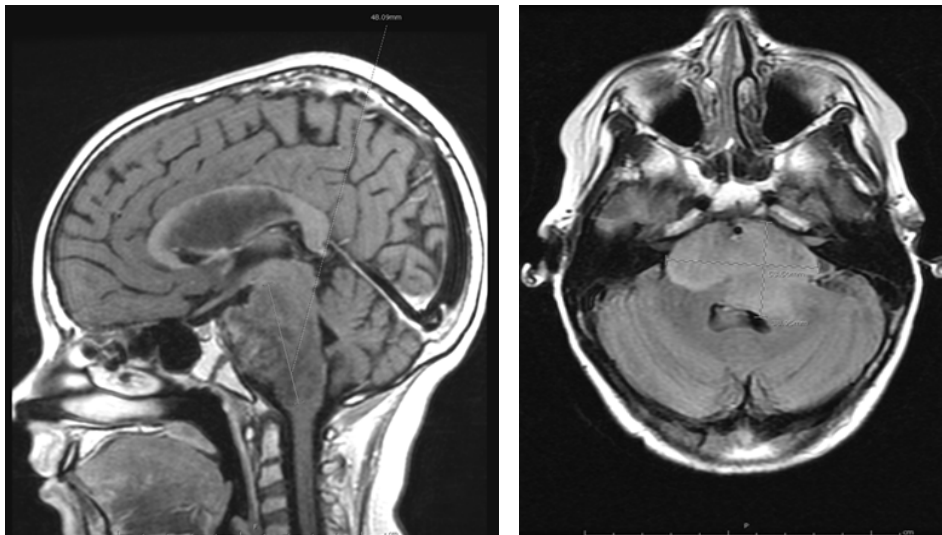

**Supplementary Figure 4. Sagittal and axial view MRI of DIPG4 and DIPG7.** (A) DIPG patient with non-enhancing lesion in the pons and absence of tumor extension to the cerebral cortex (DIPG4). (B) DIPG patient with non-enhancing pontine lesion and tumor extension to the lateral ventricles (DIPG7). These MRIs were taken from patients 2 weeks (DIPG7) and 3 months (DIPG4) before death, respectively.

Supplementary Figure 5

DIPG1-Medulla

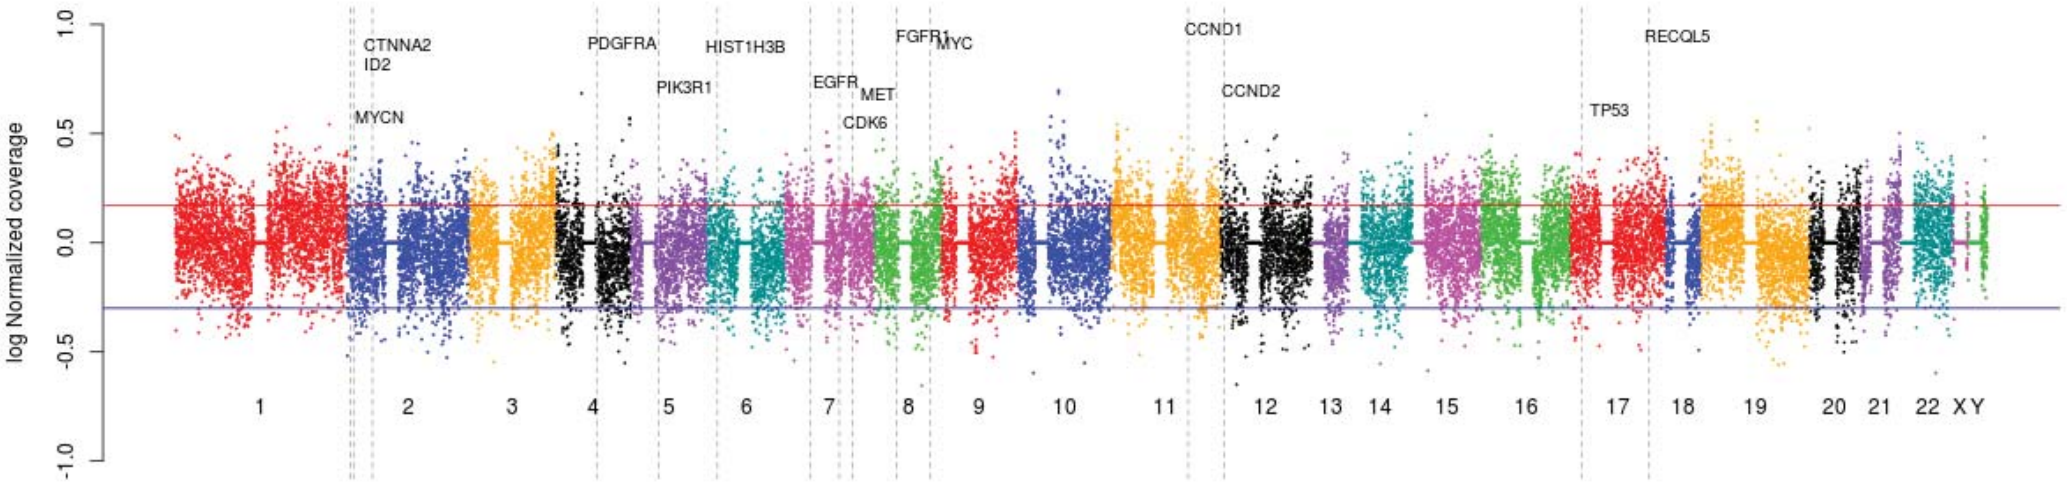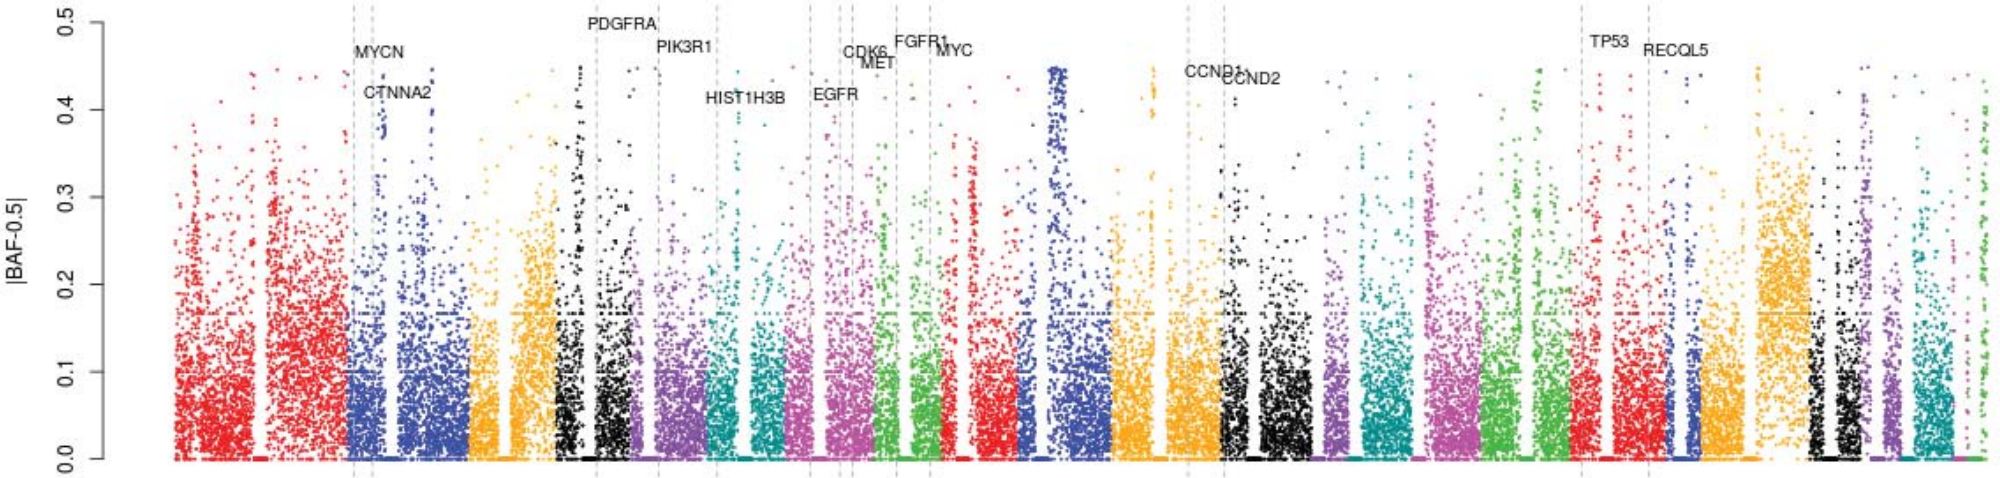



### DIPG1-Midbrain

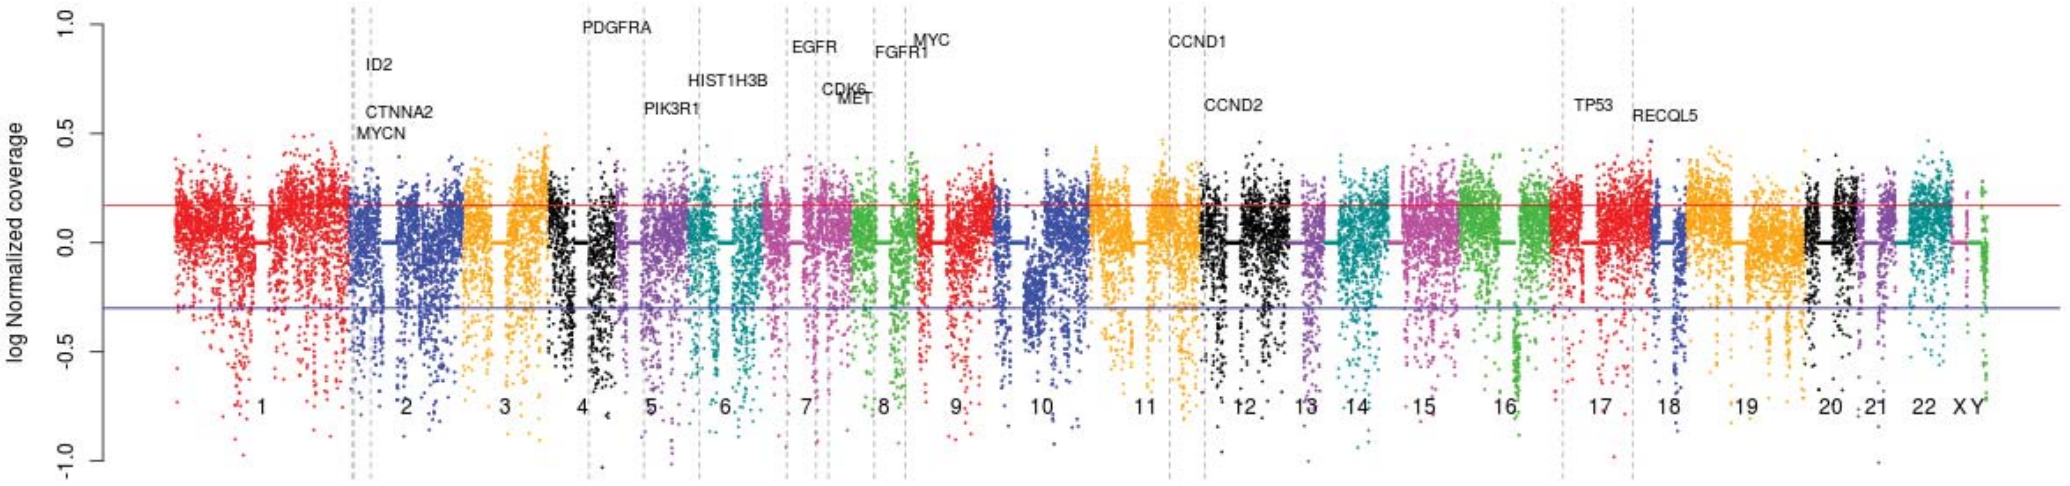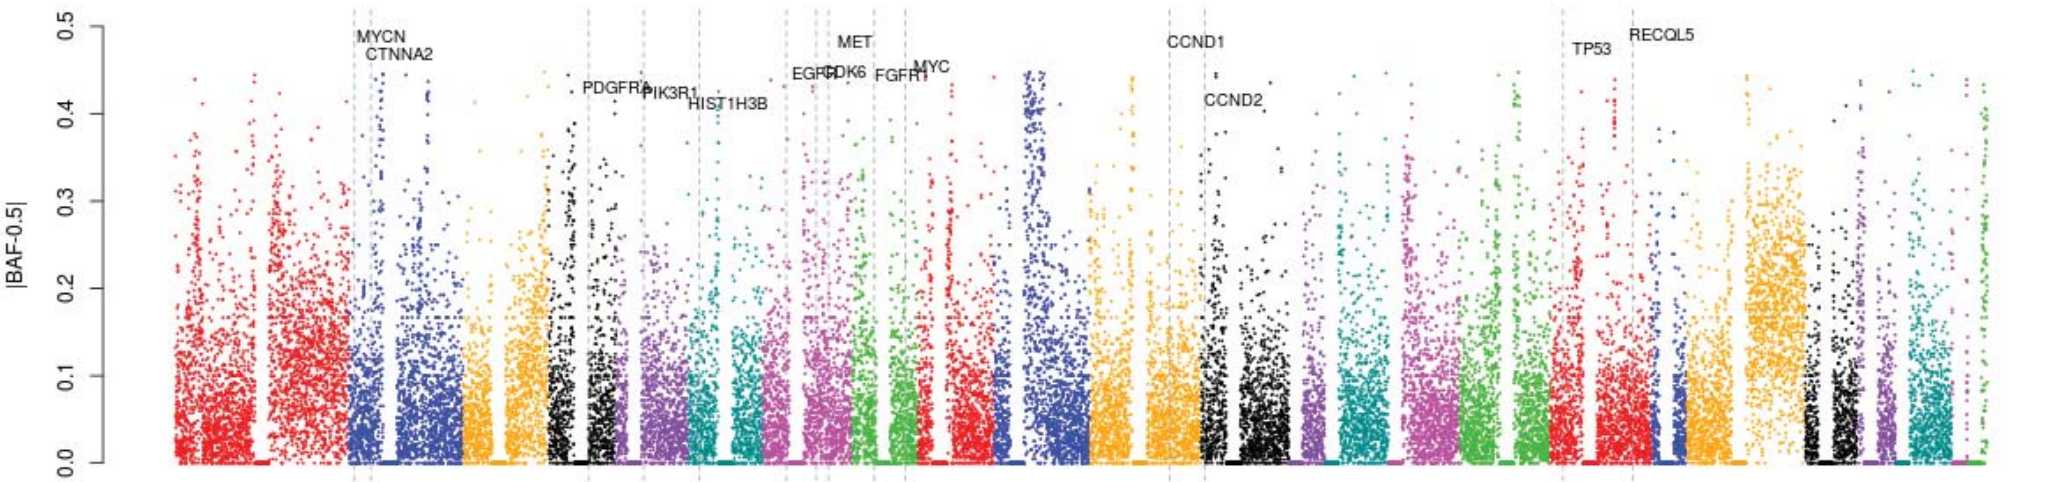



### DIPG1-Pons 1

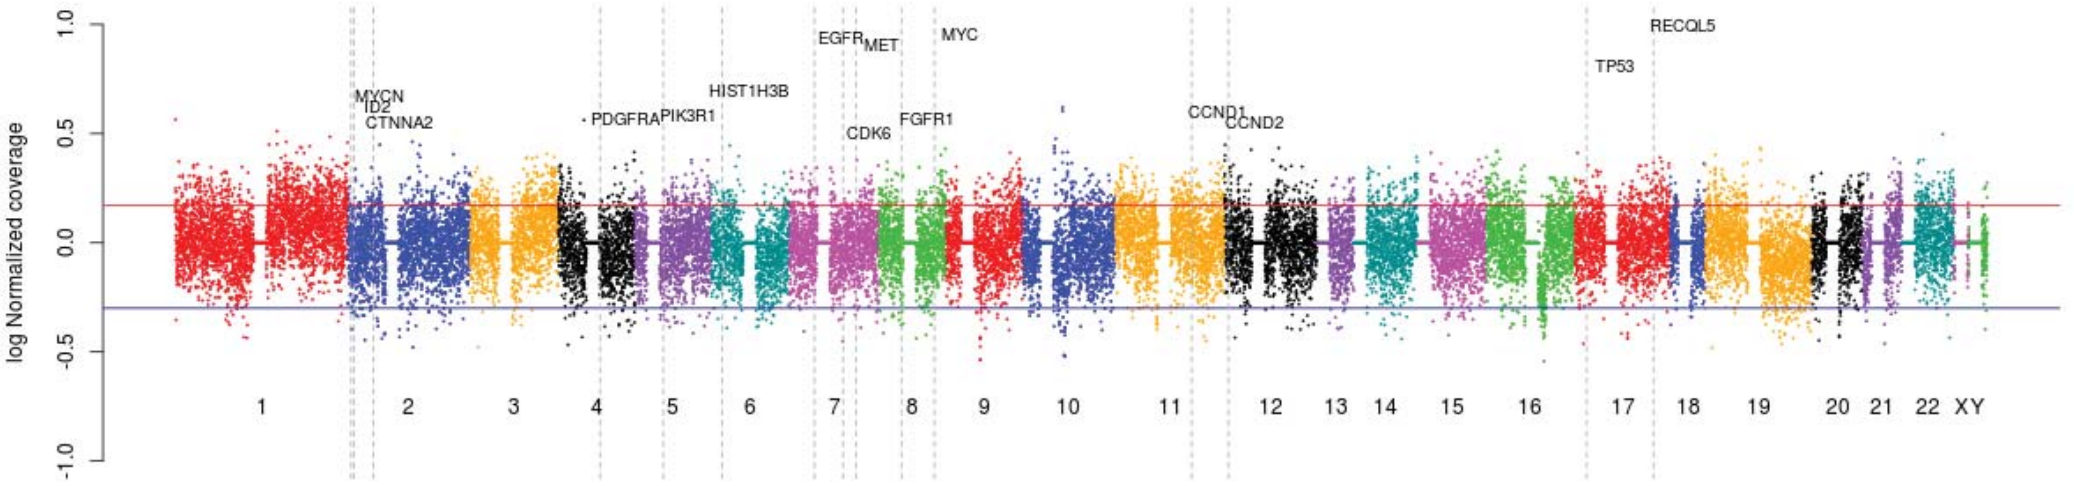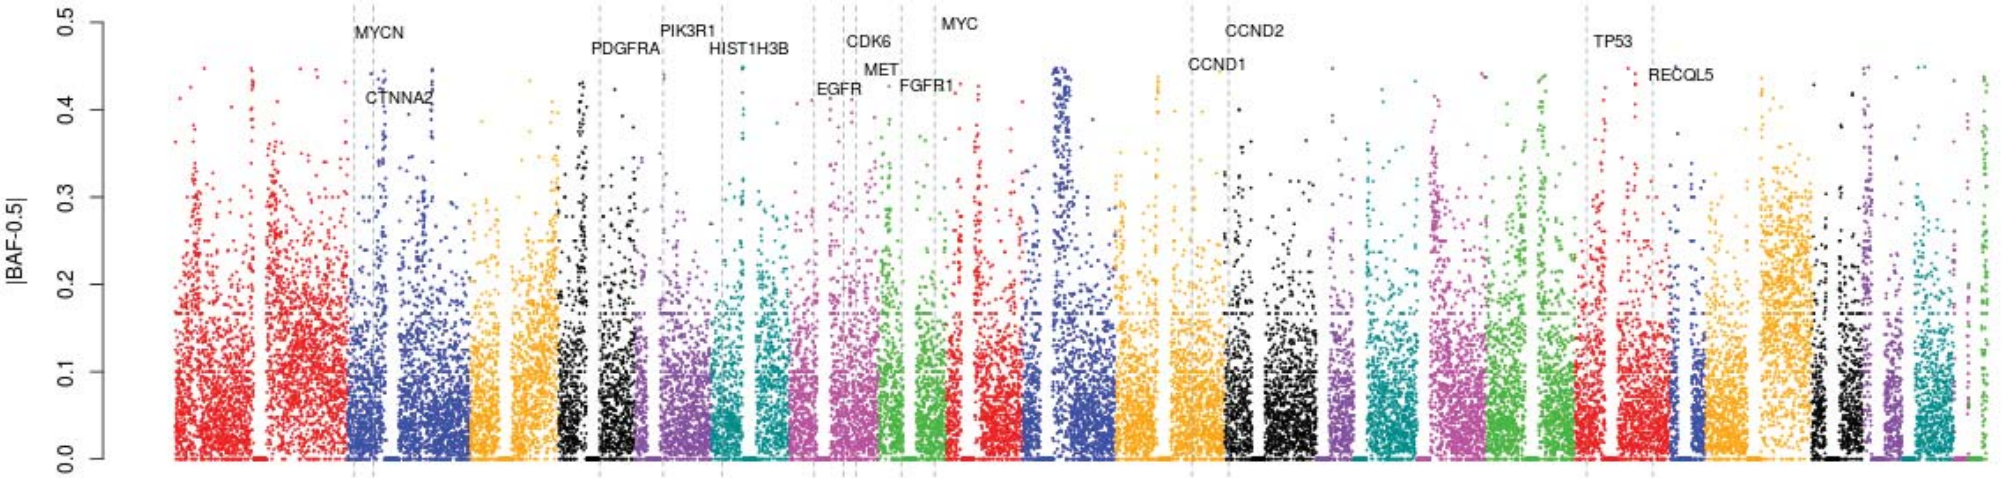



### DIPG1-Pons 2

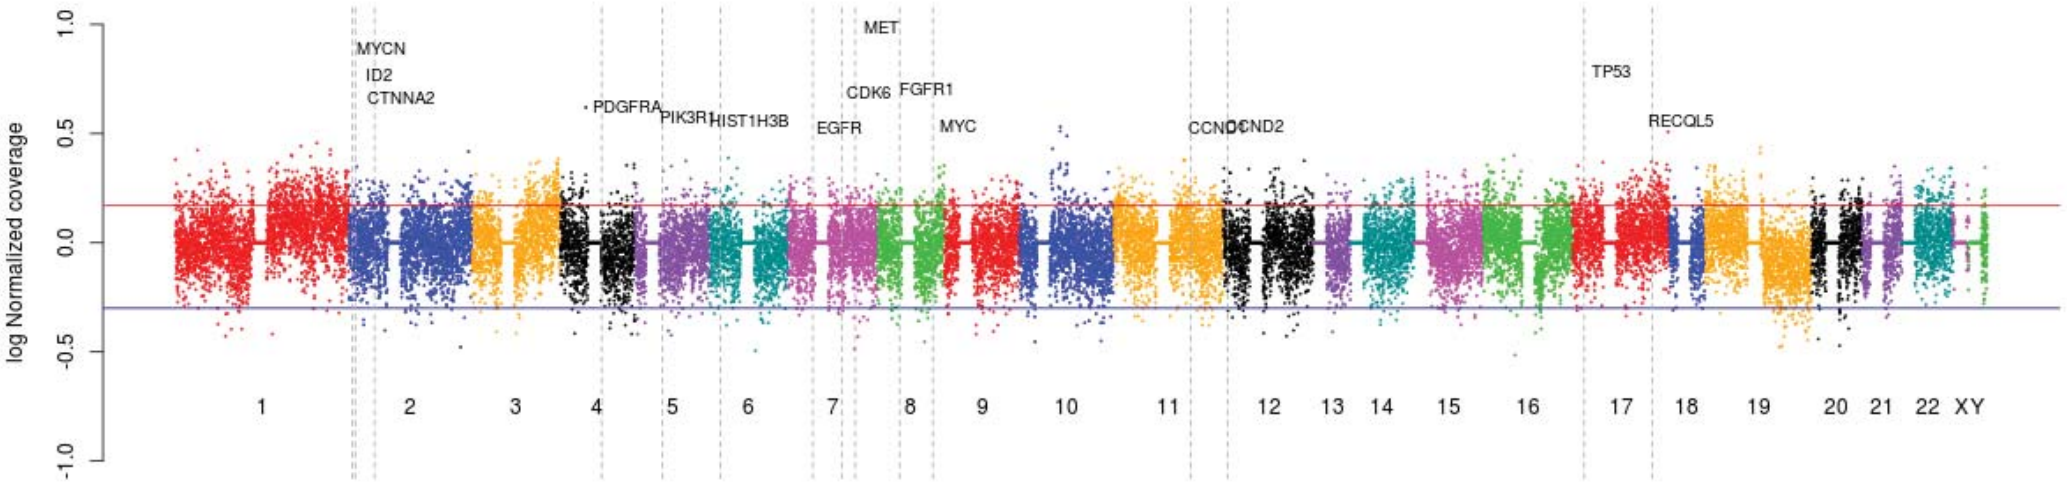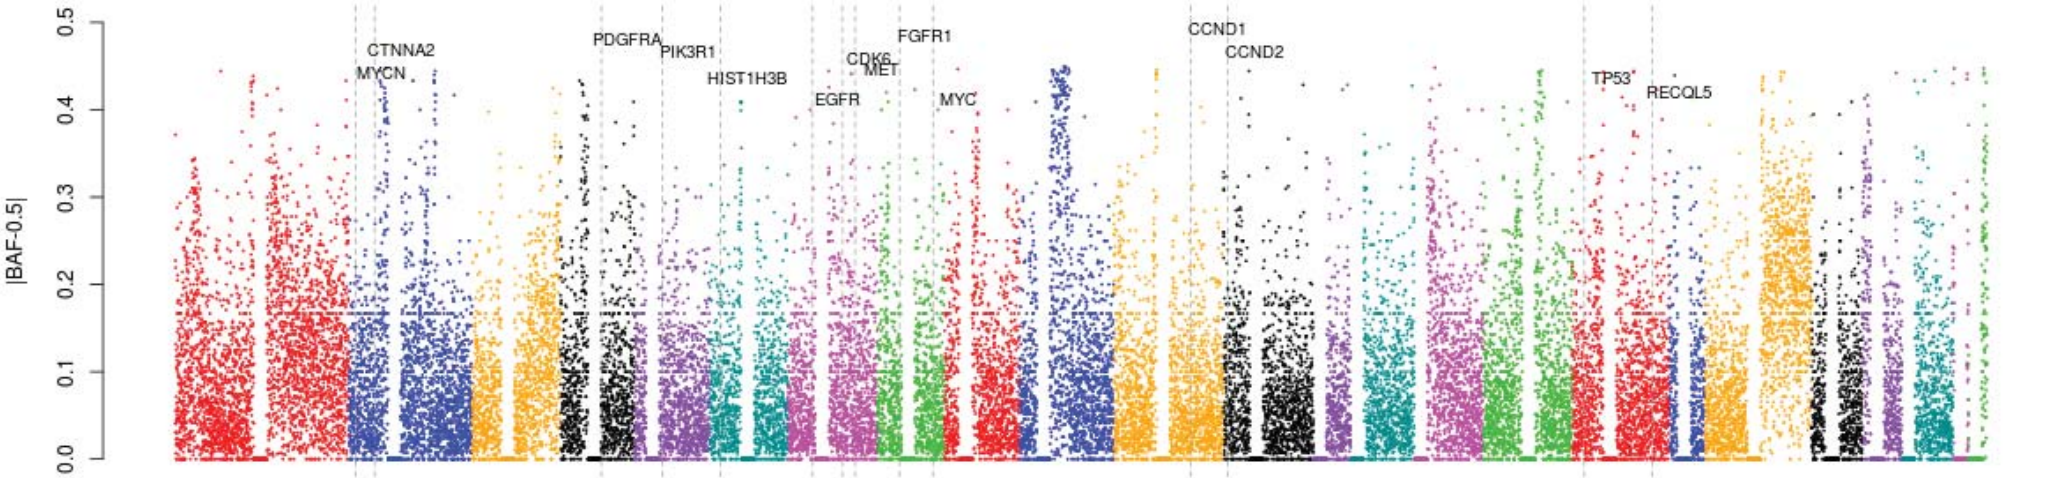

### DIPG1-Pons 3

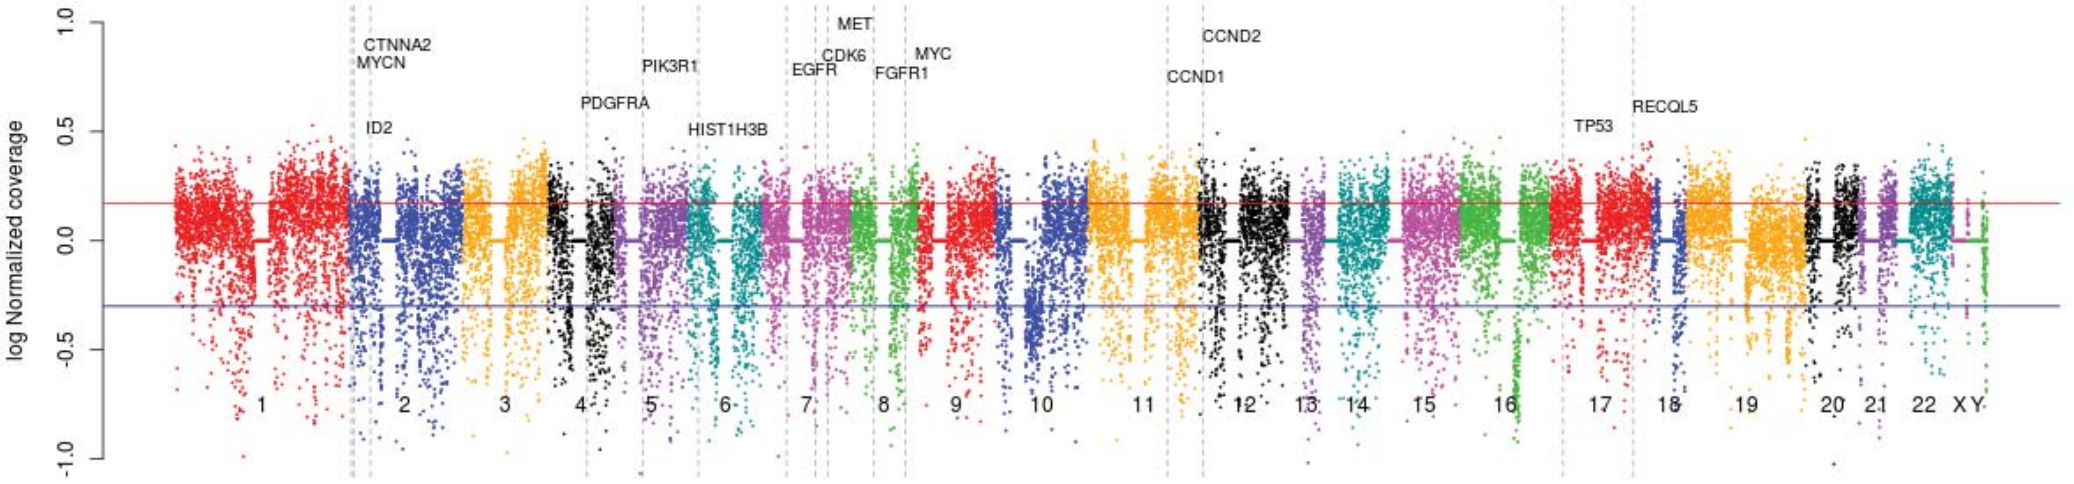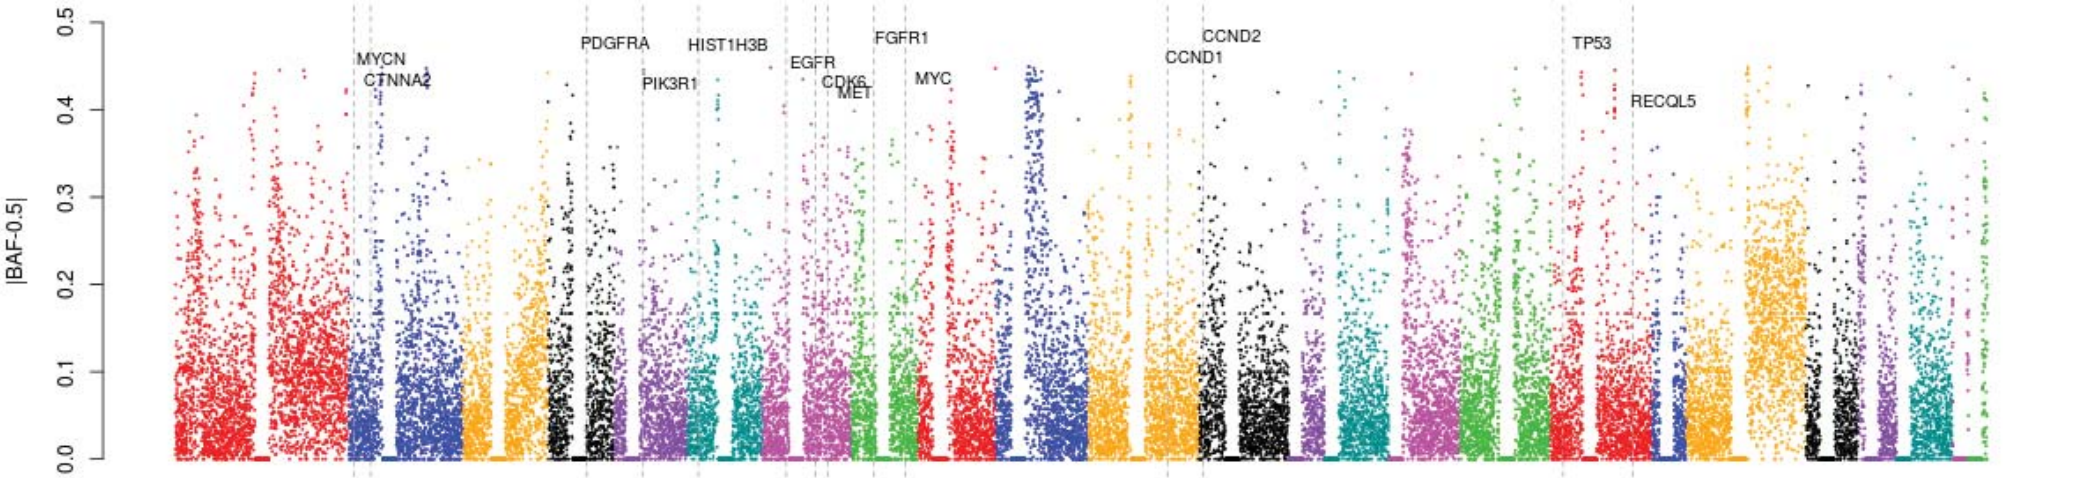



### DIPG1-Pons 4

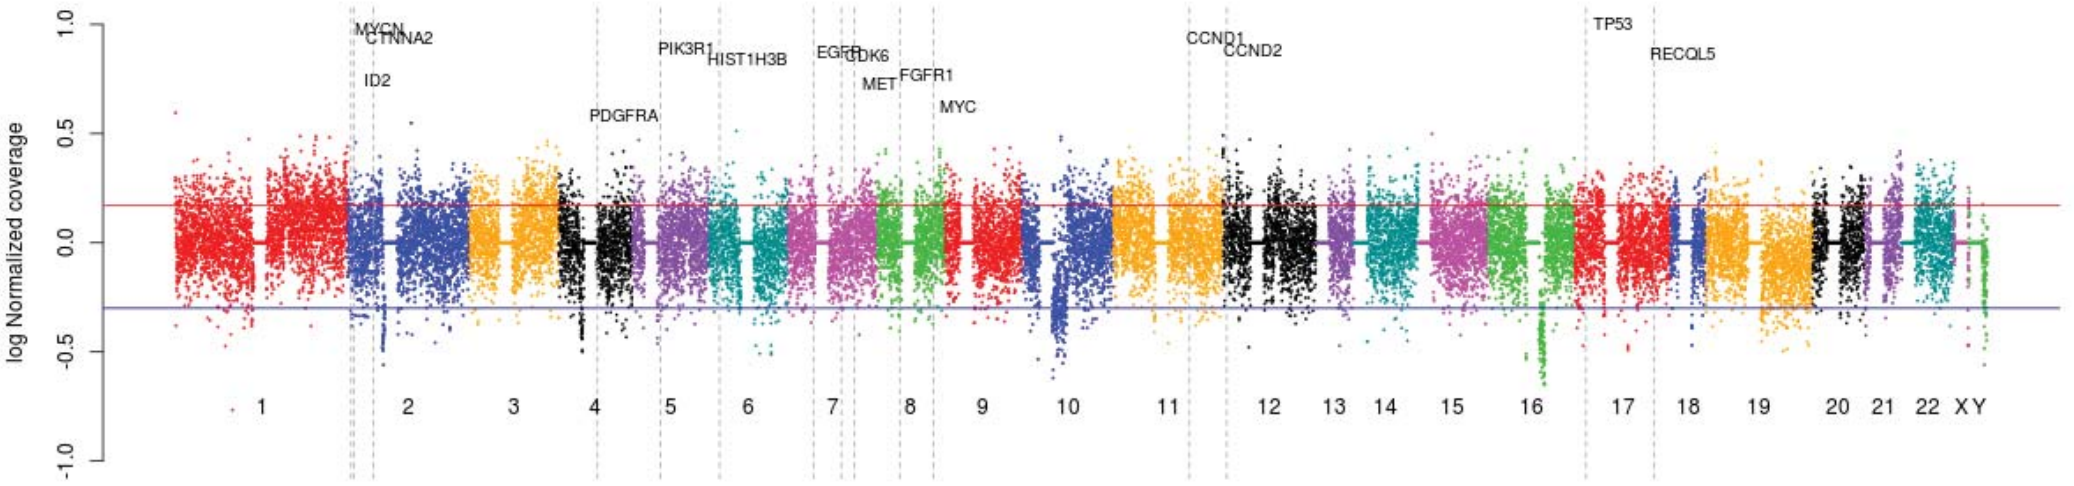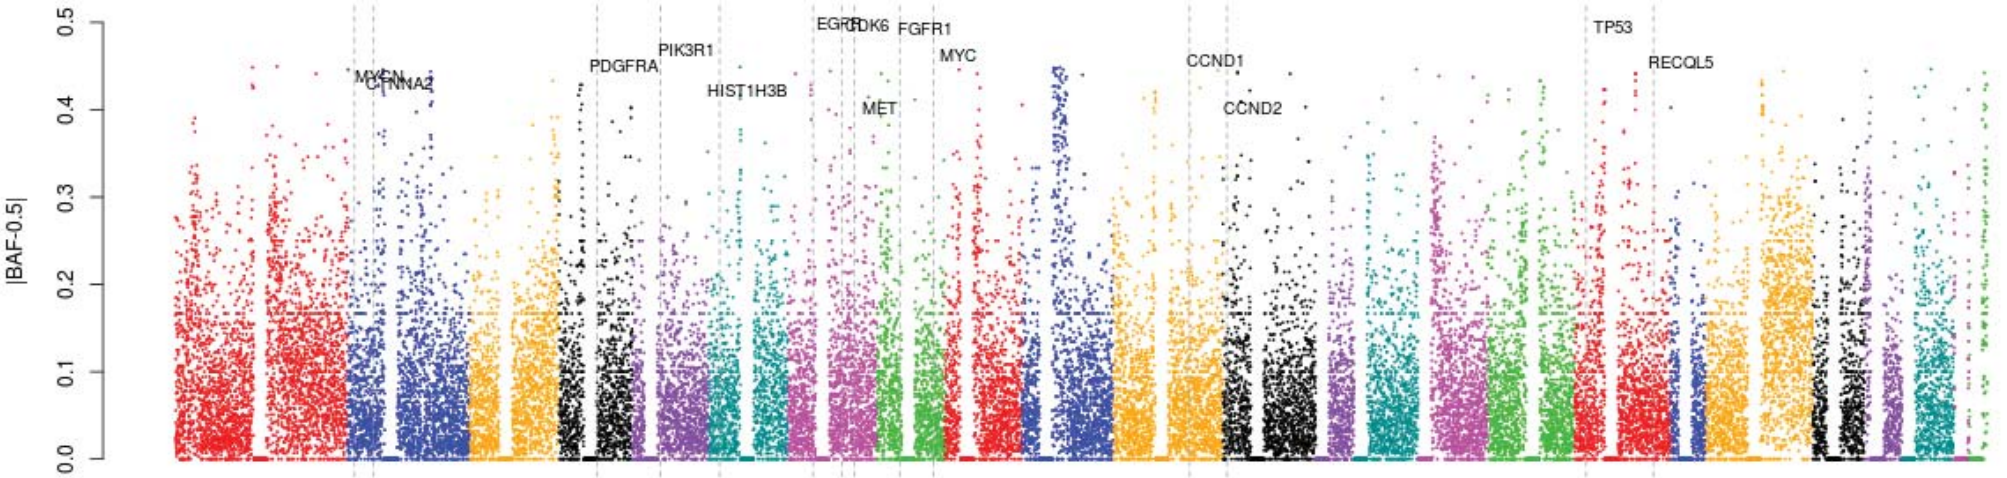

### DIPG2-Cerebellum 1

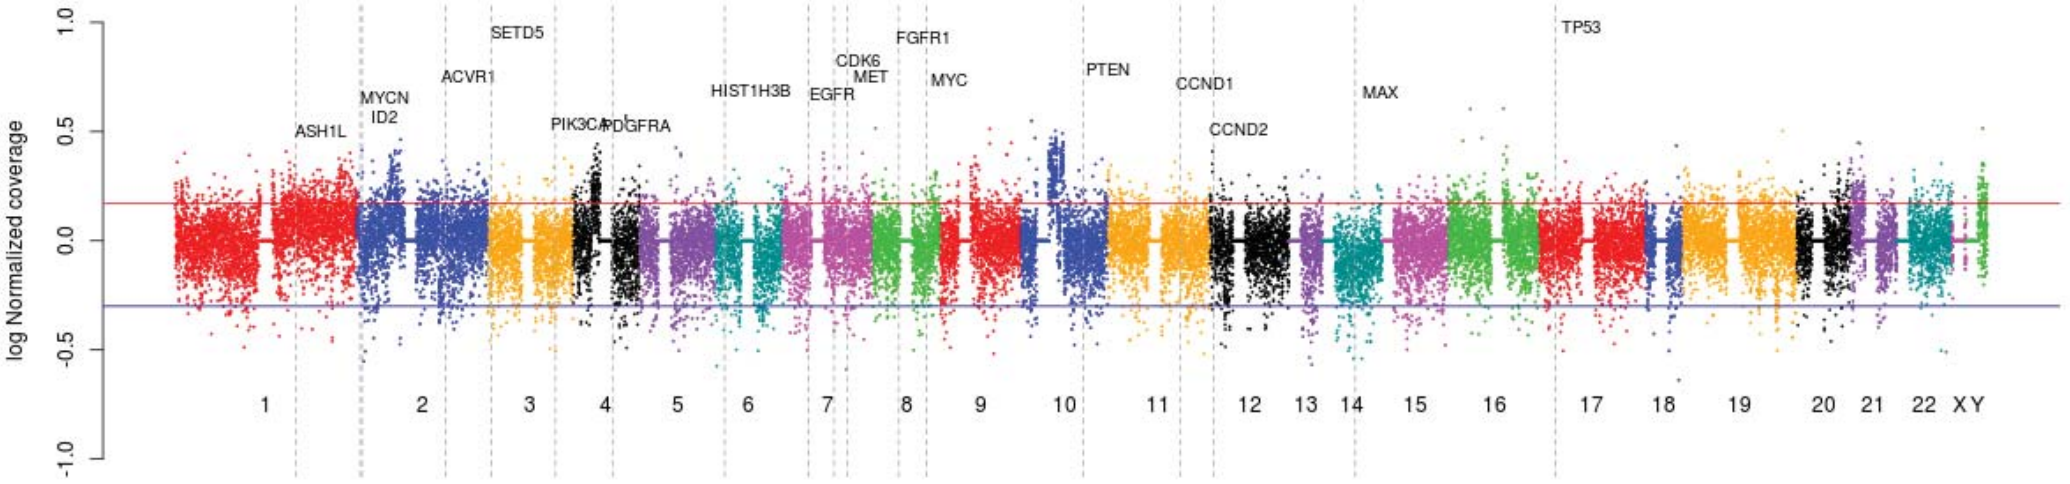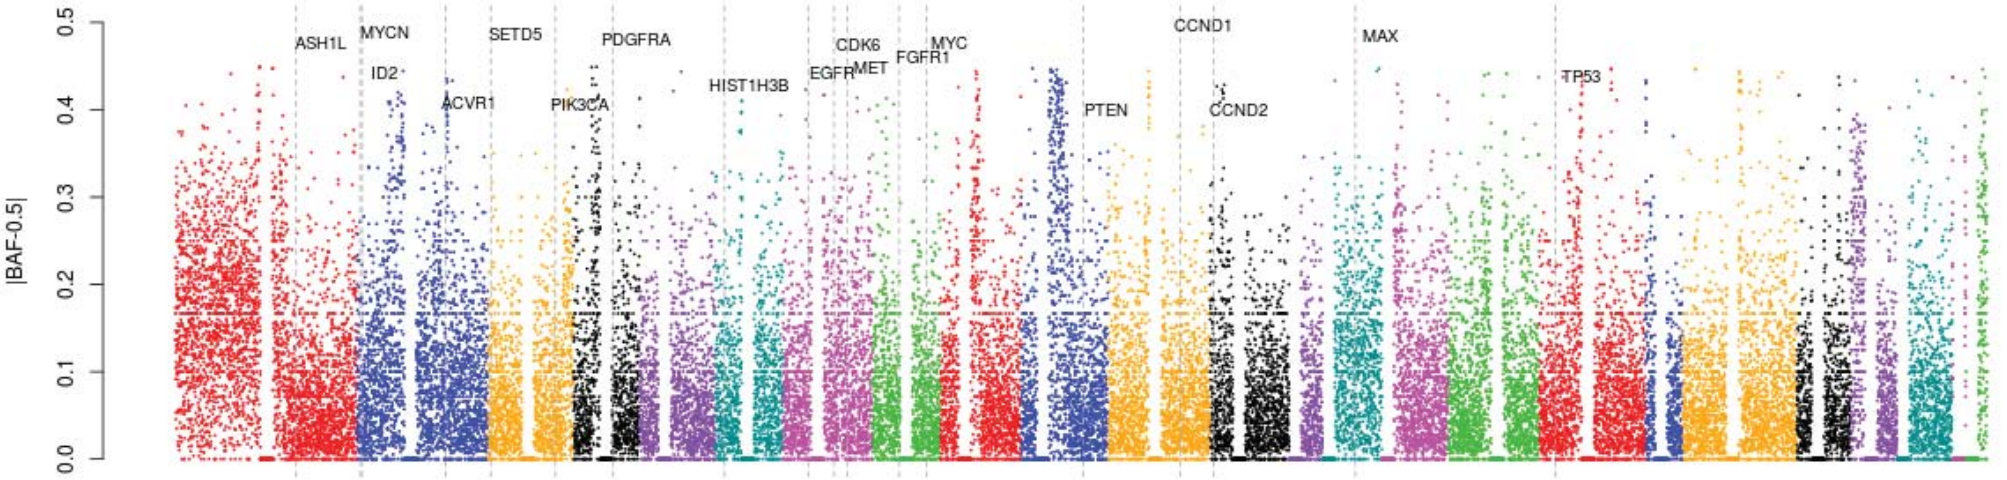



### DIPG2-Cerebellum 2

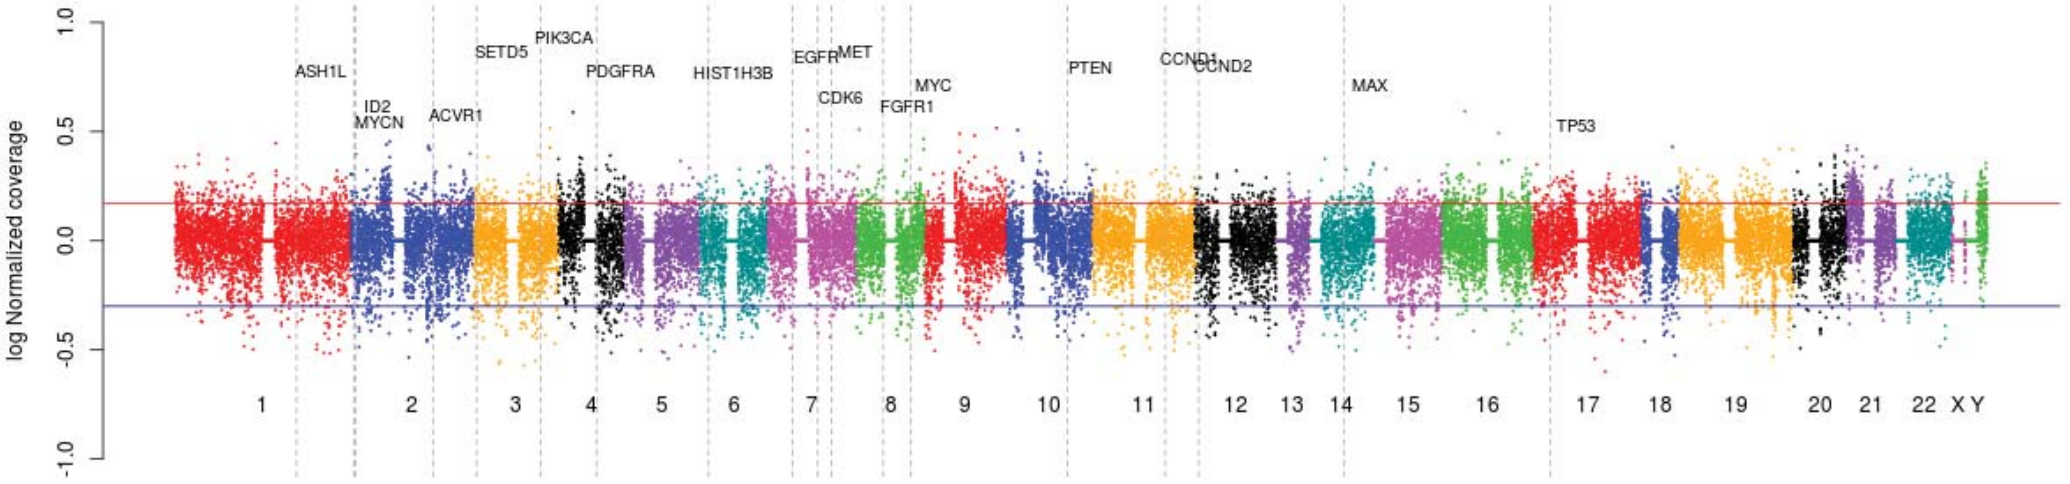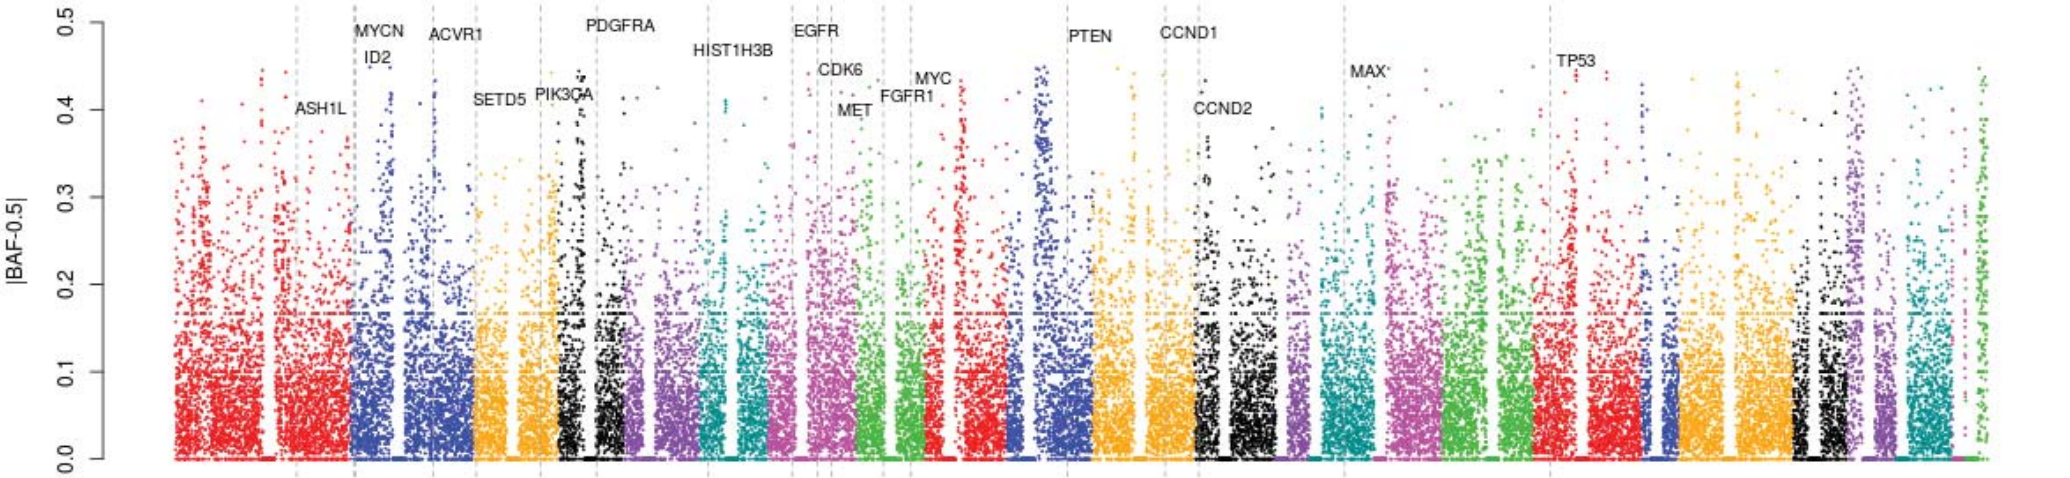



### DIPG2-Cerebellum 3

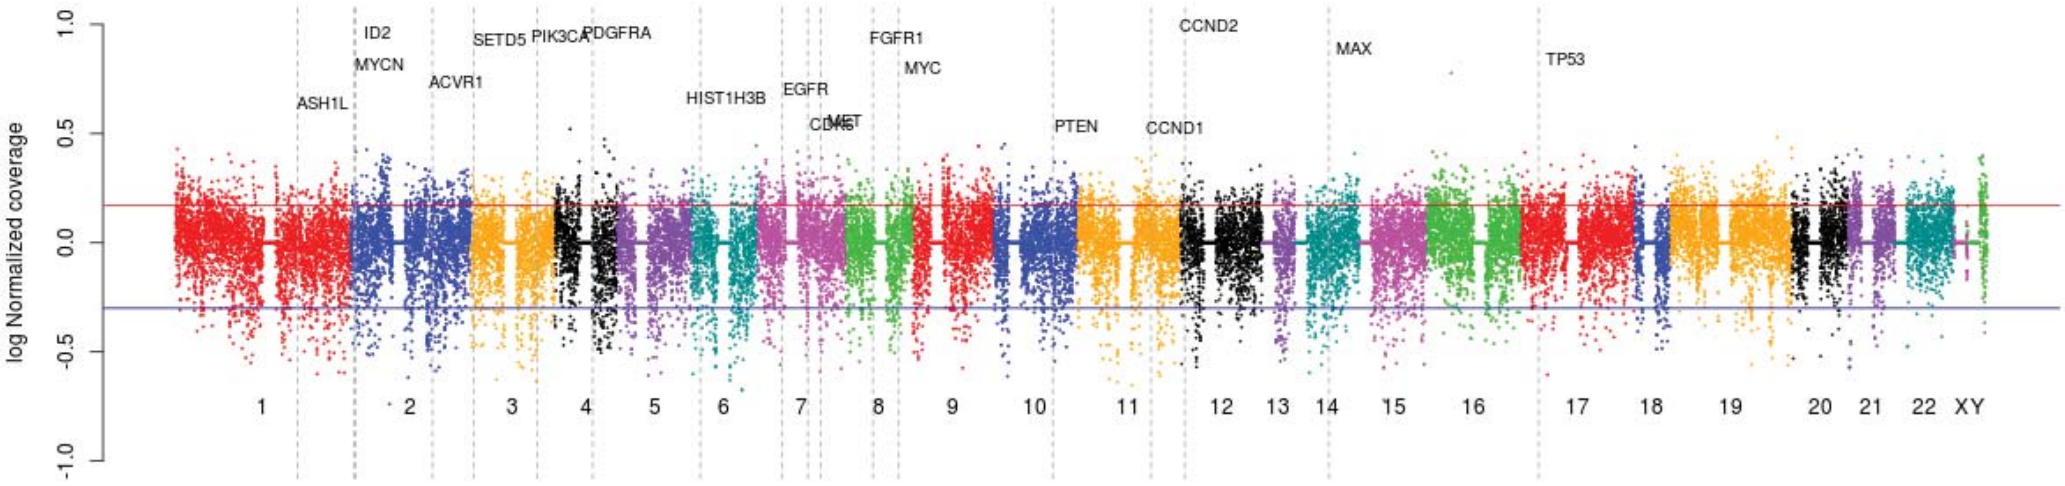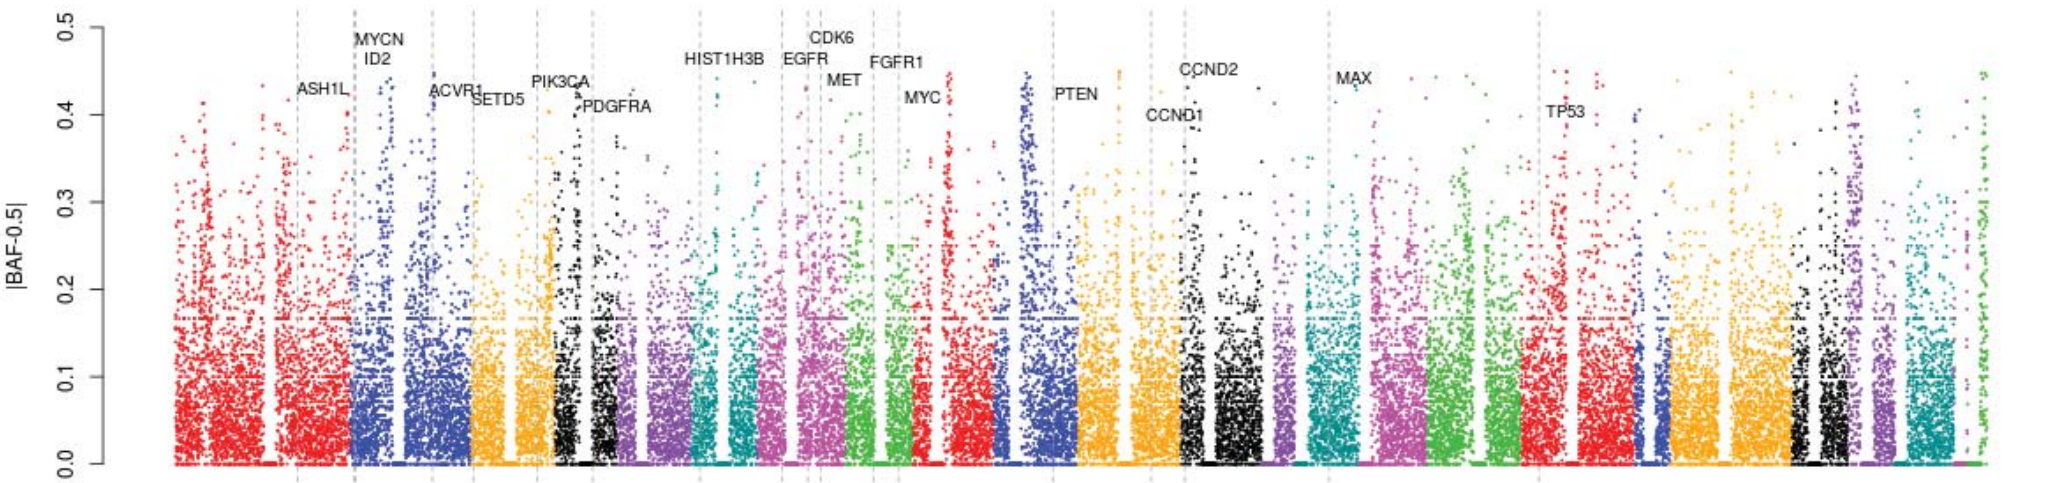



### DIPG2-Frontal Lobe 3

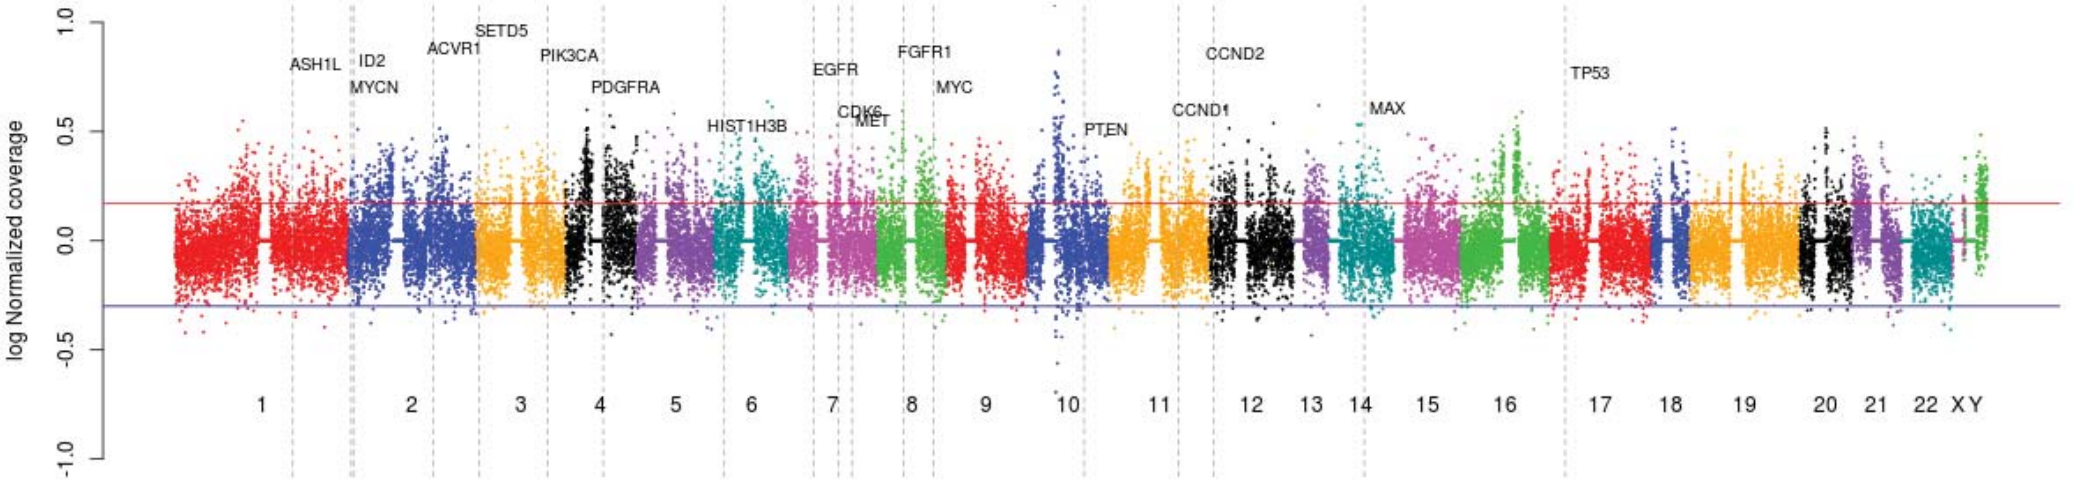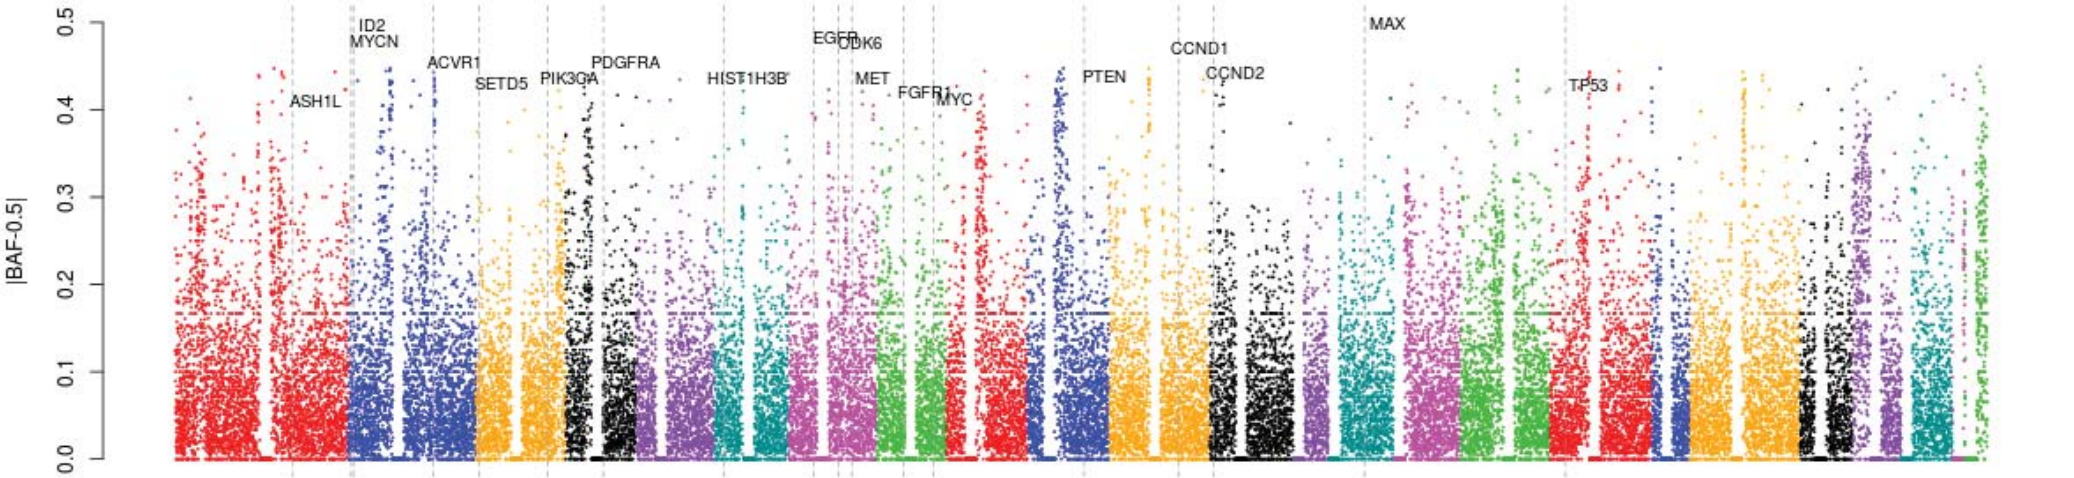



### DIPG2-Medulla

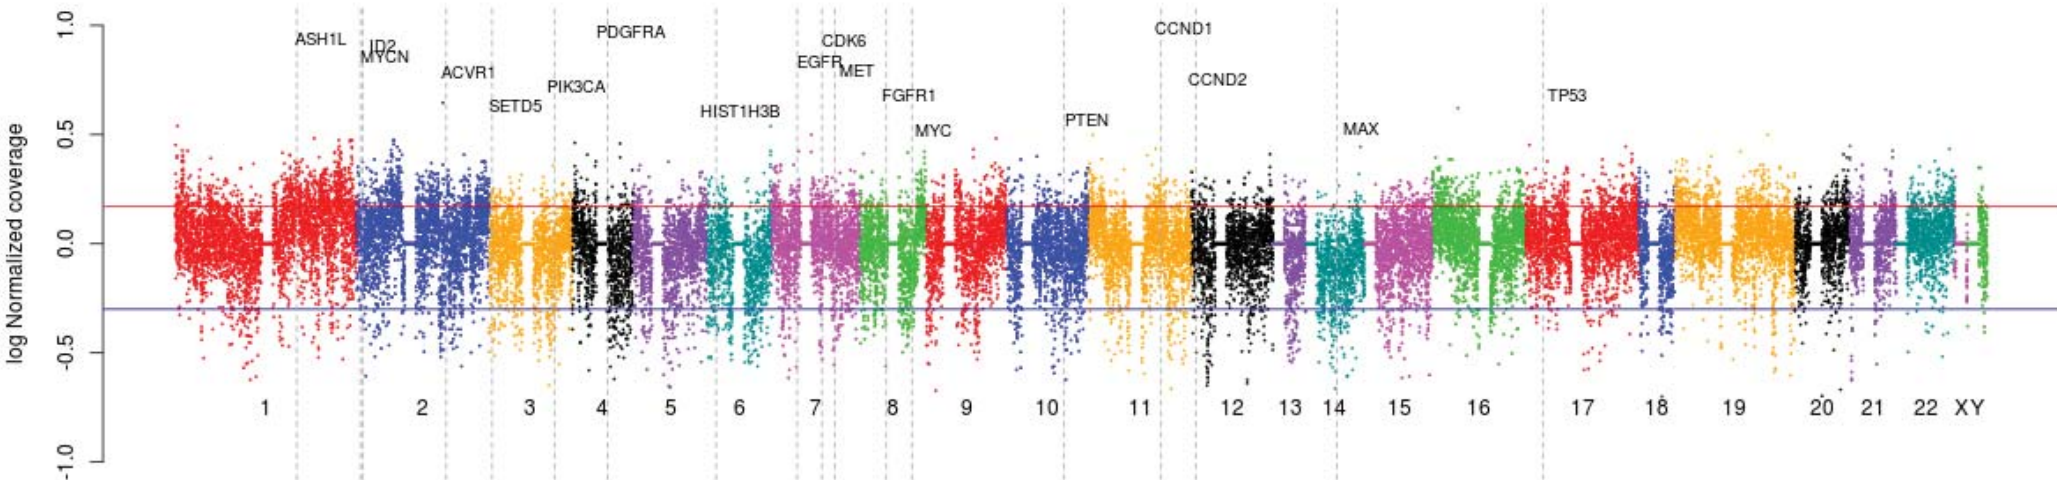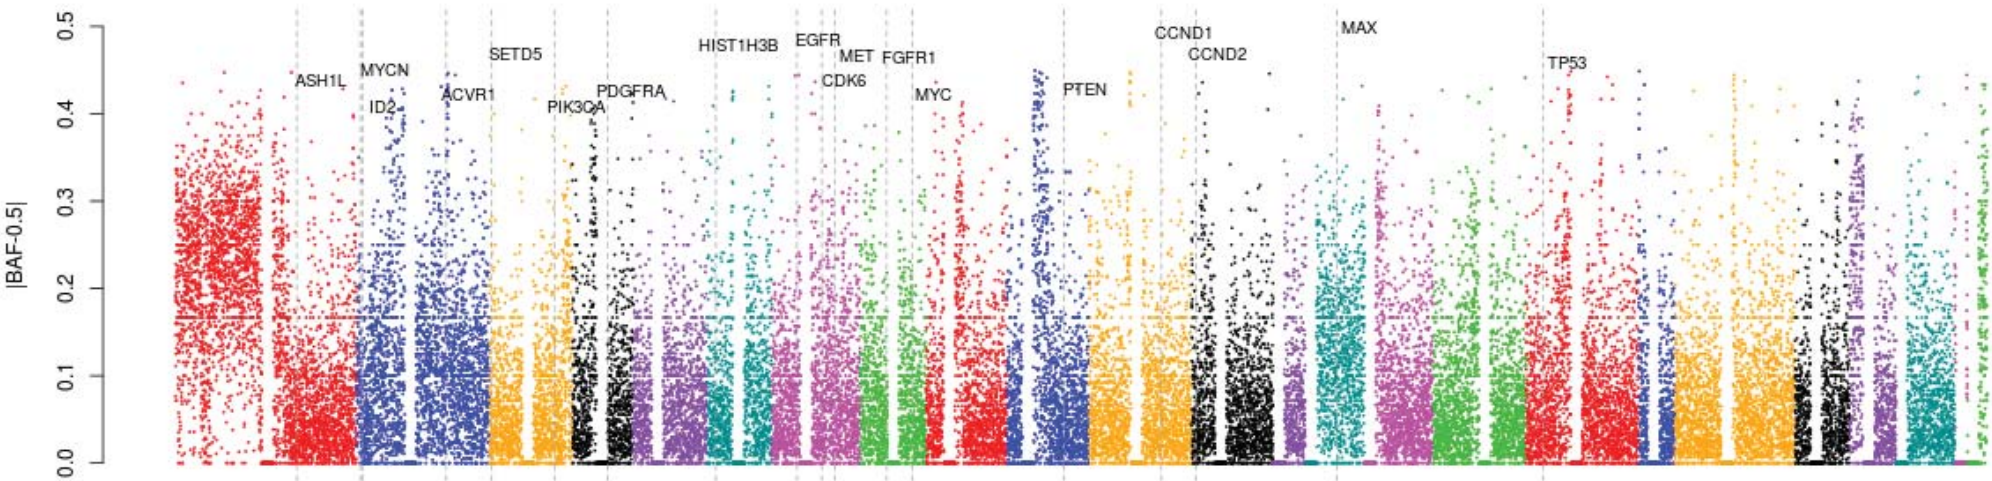



### DIPG2-Occipital Lobe 2

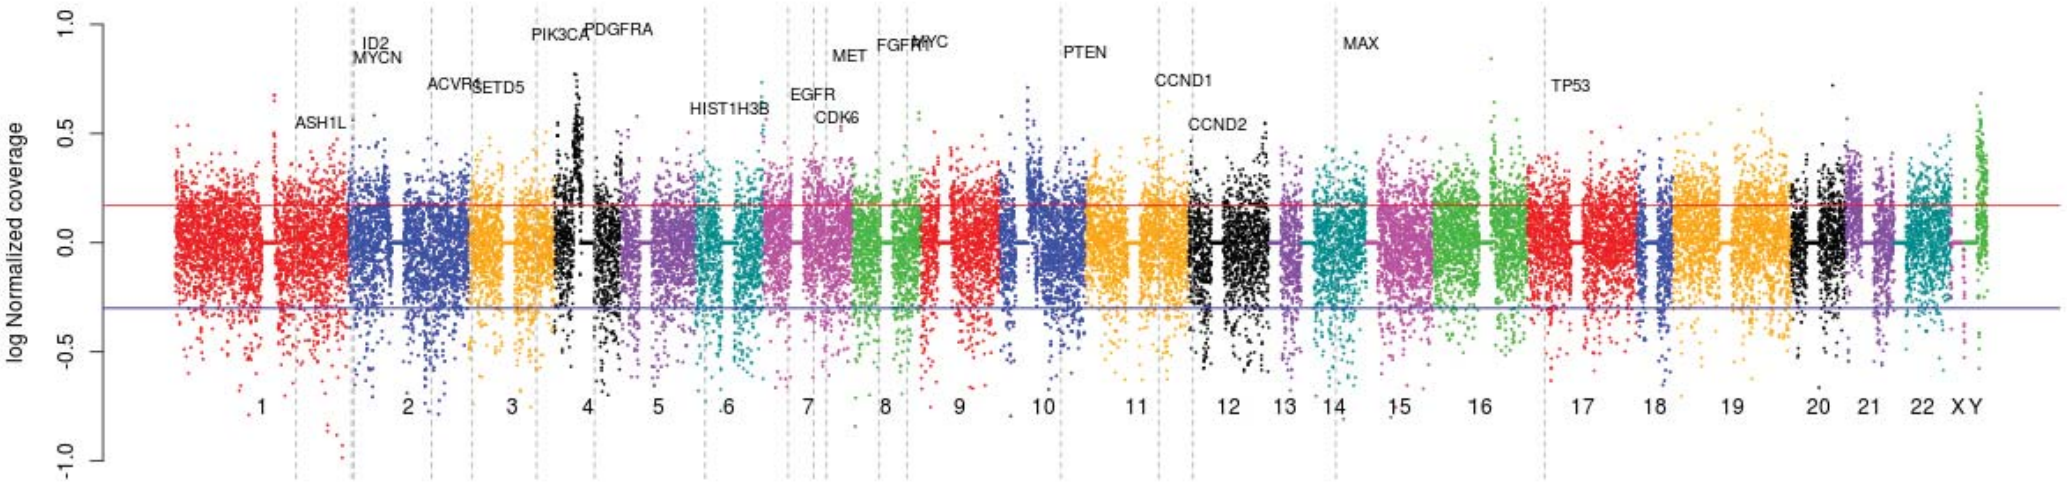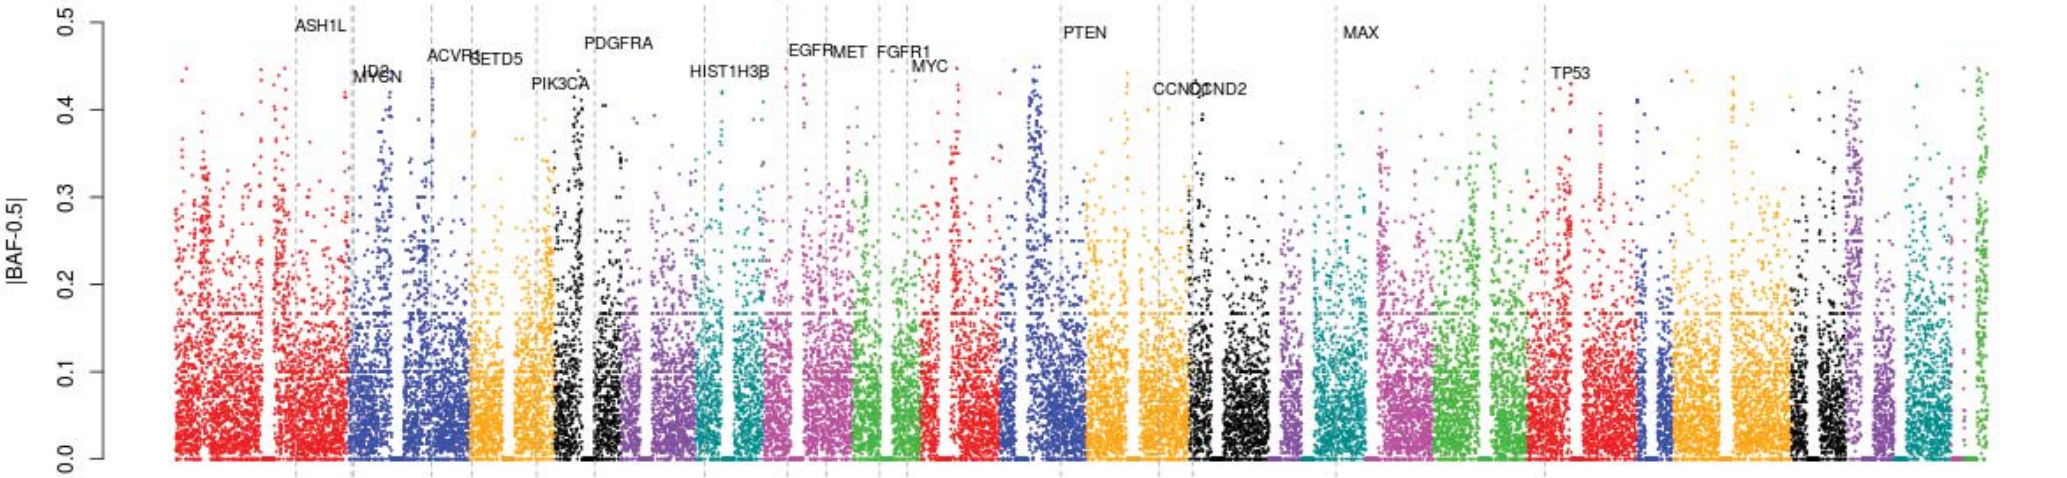



### DIPG2-Parietal Lobe 4\_lobe

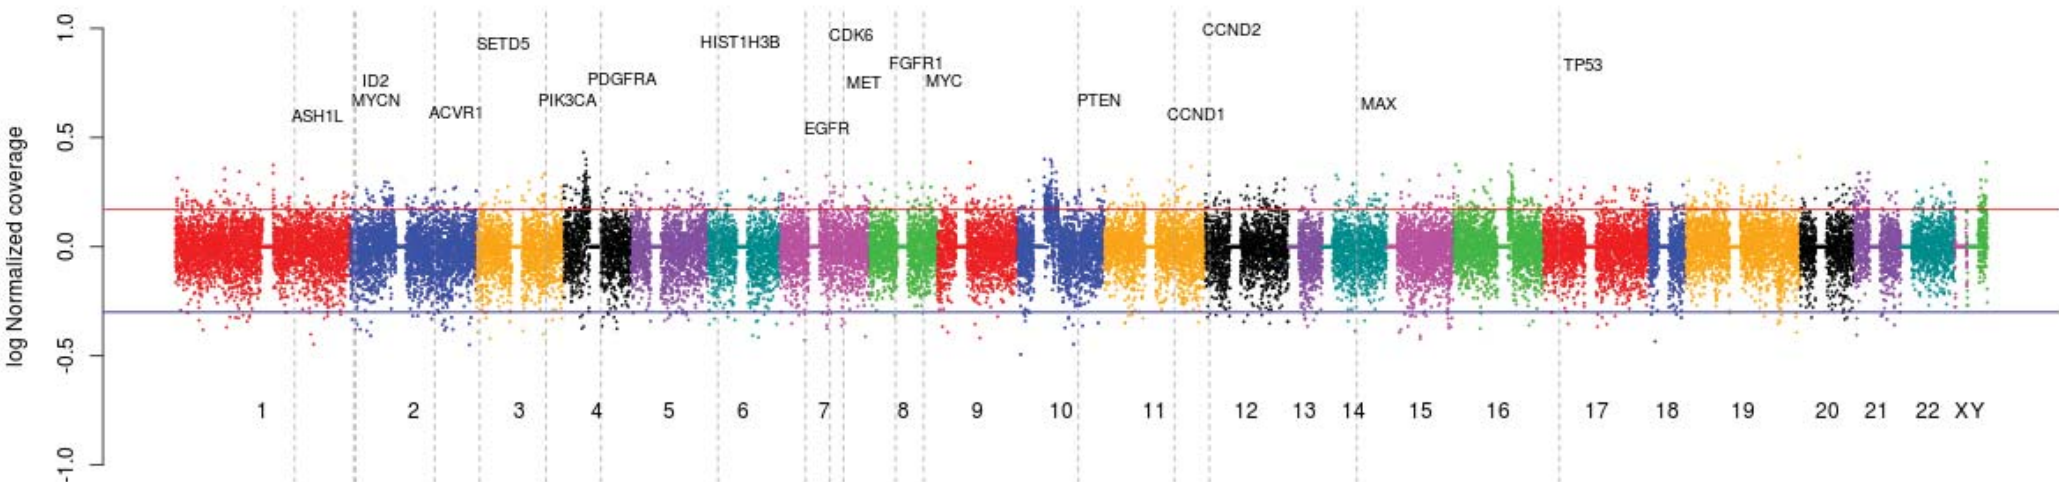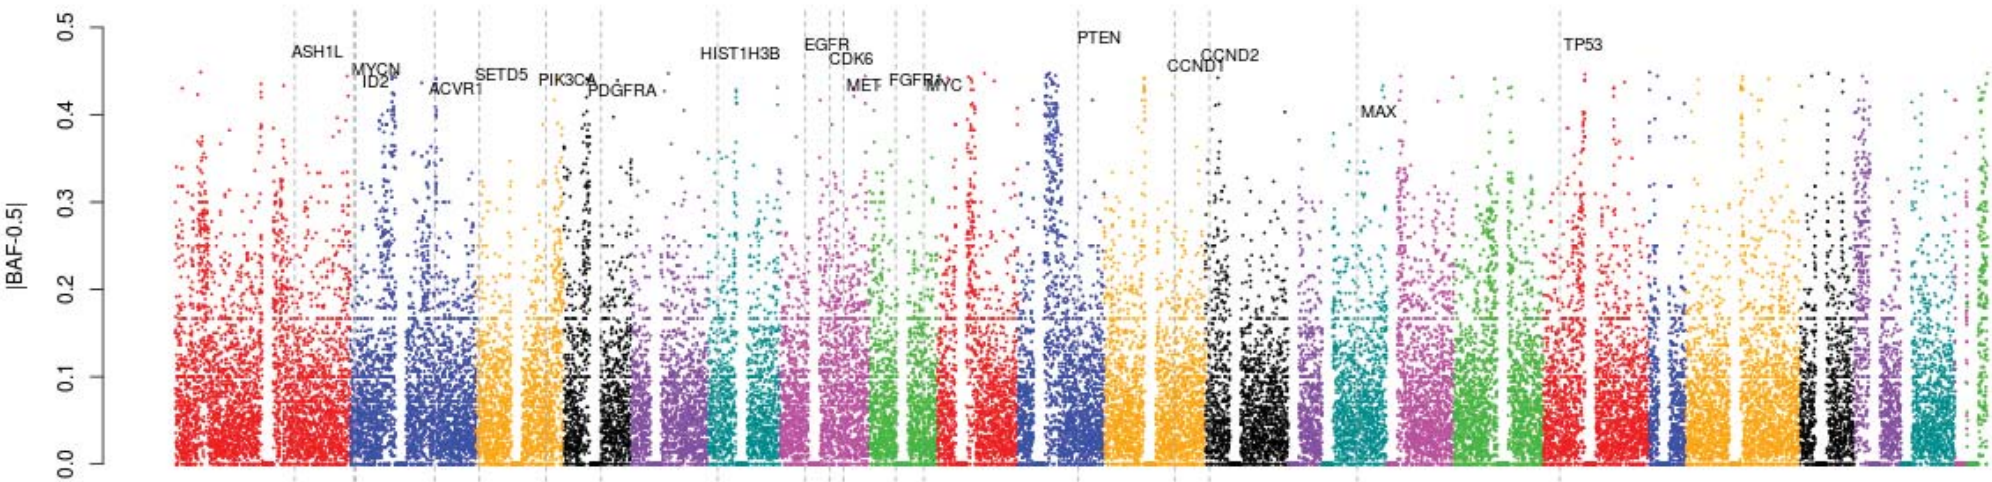



### DIPG2-Pons 1

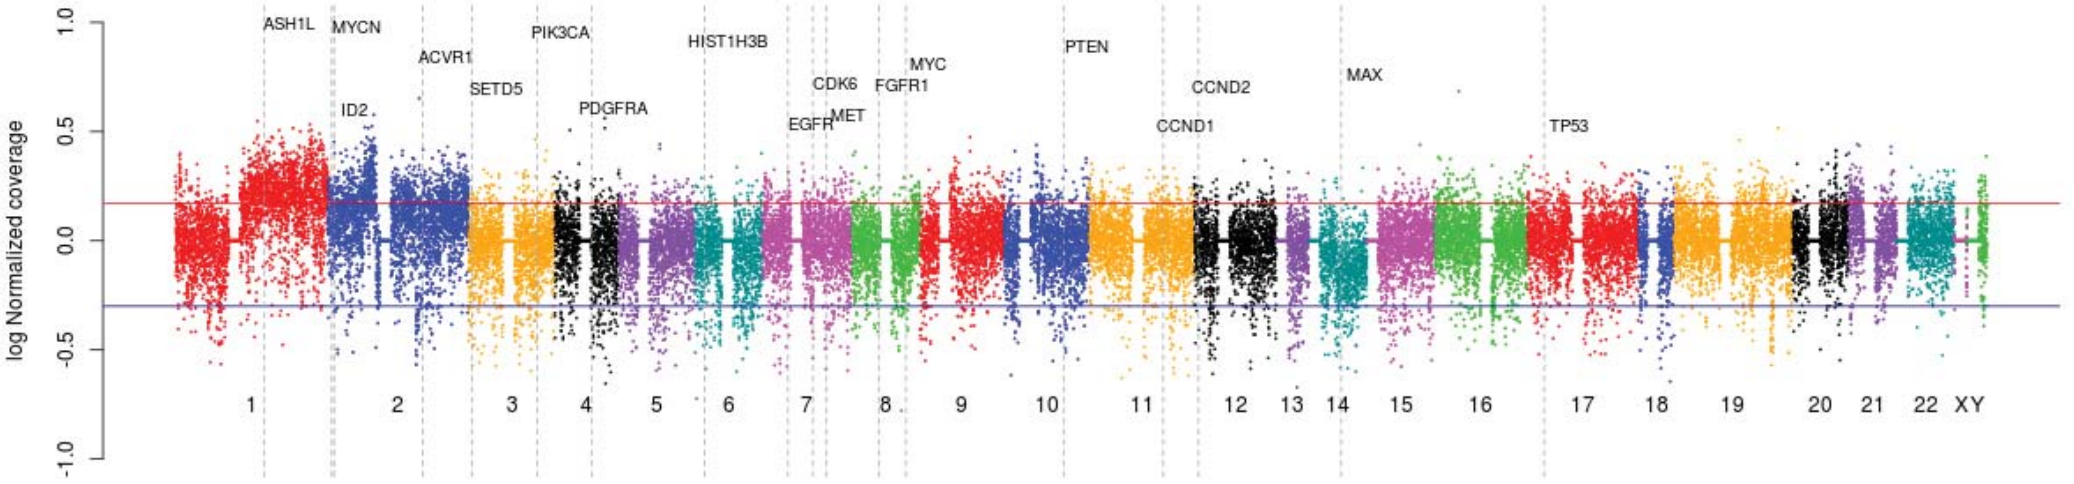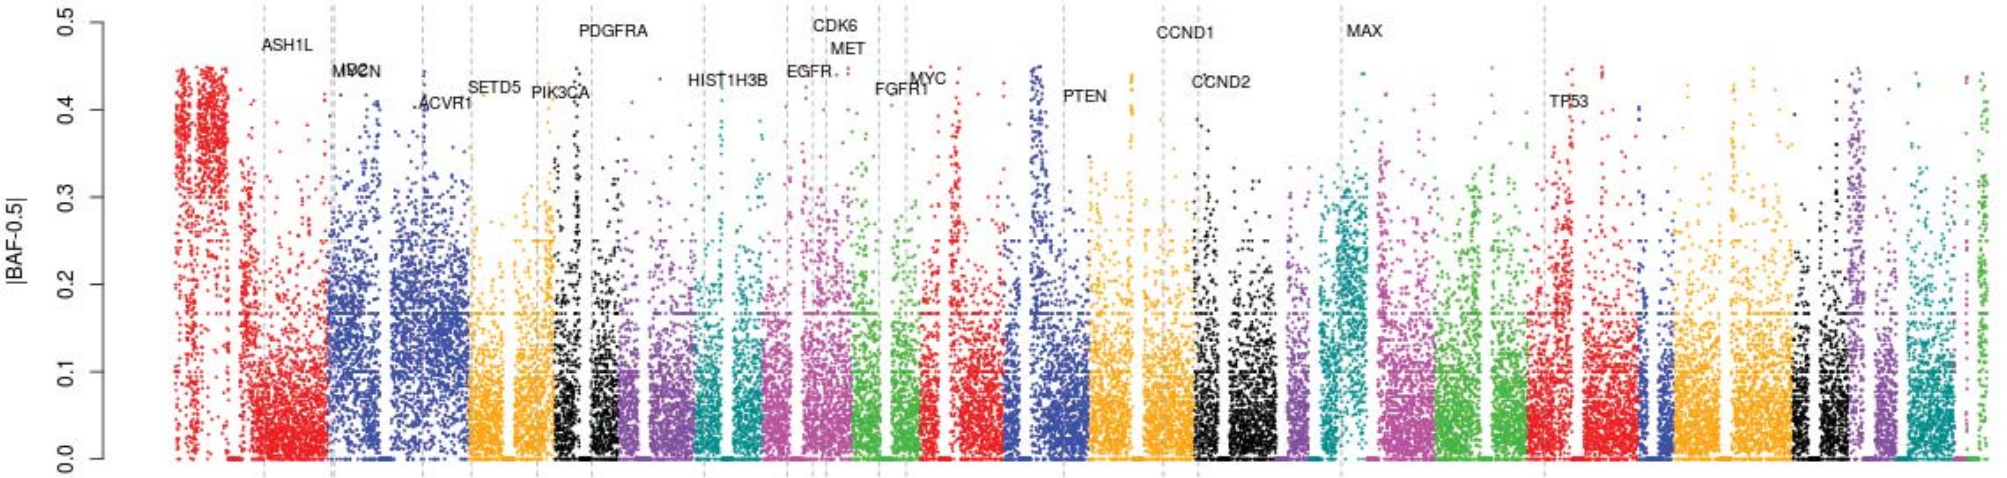



### DIPG2-Pons 2

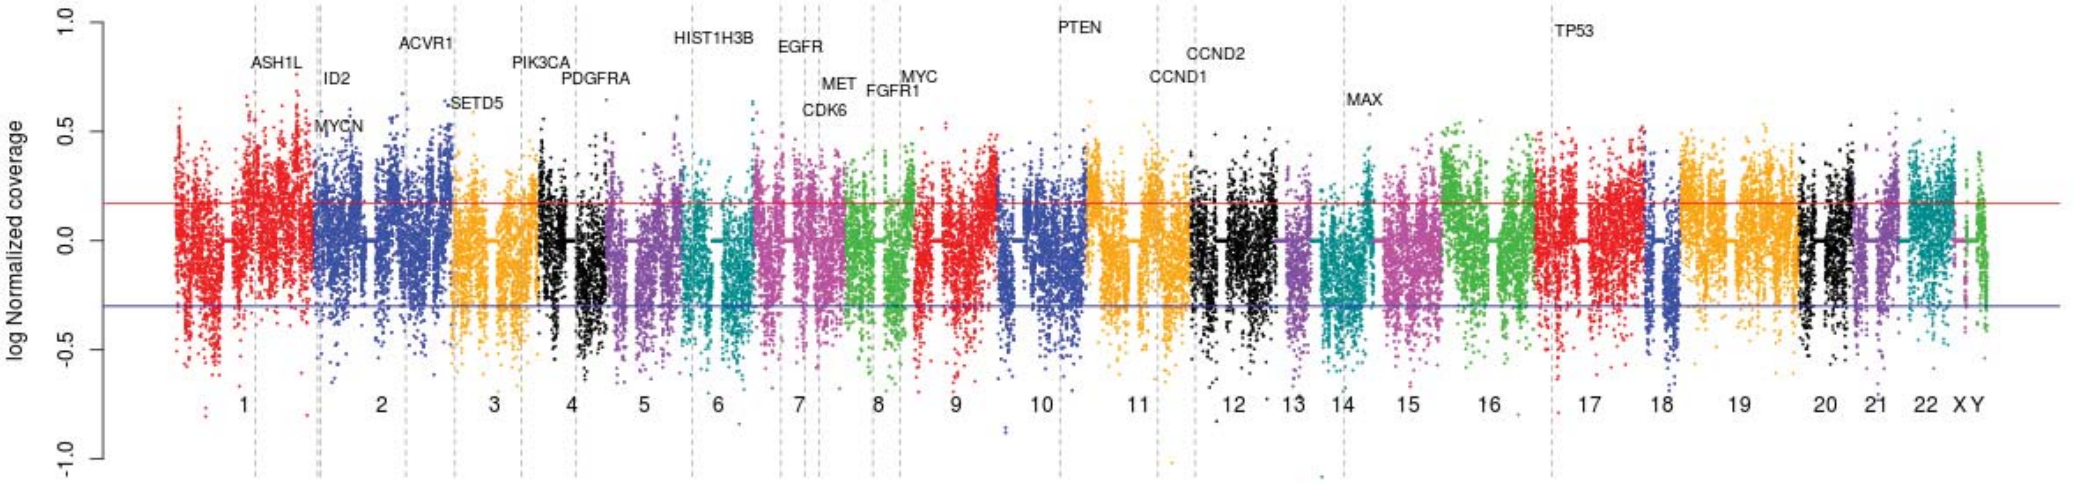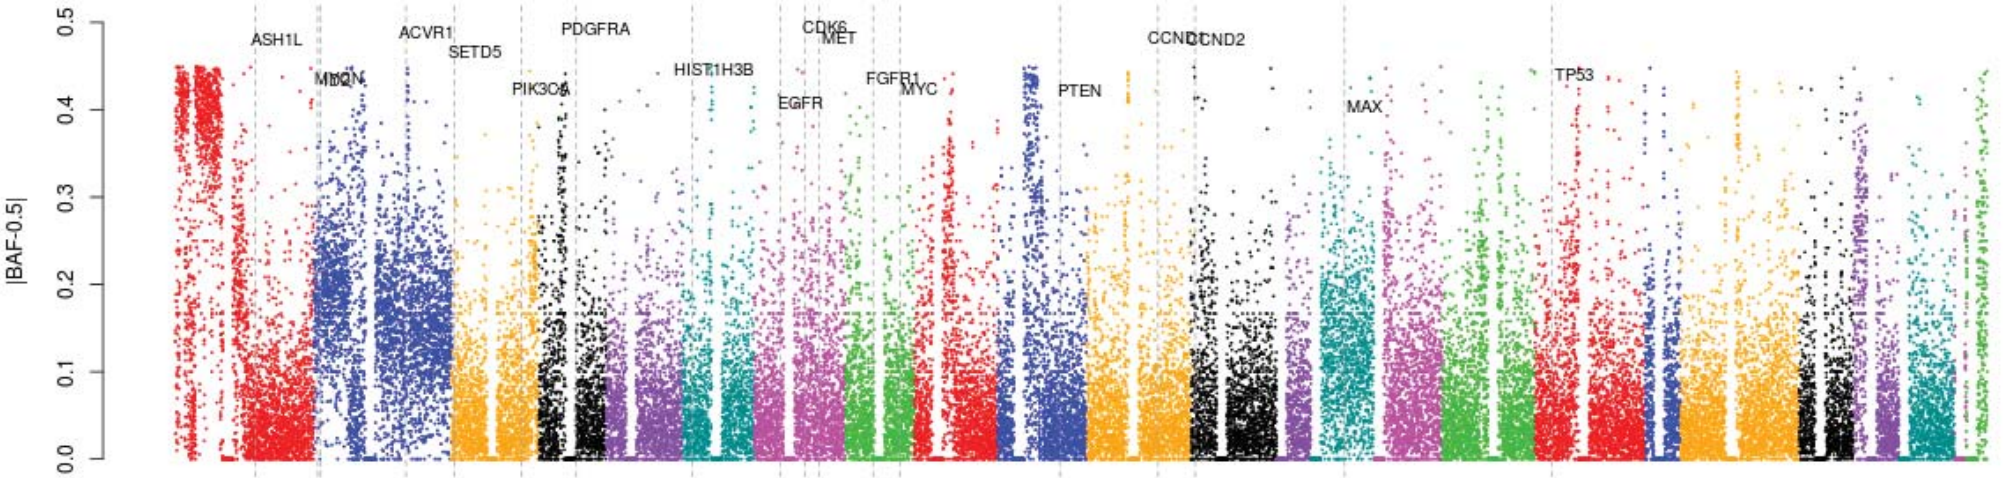



### DIPG2-Pons 3

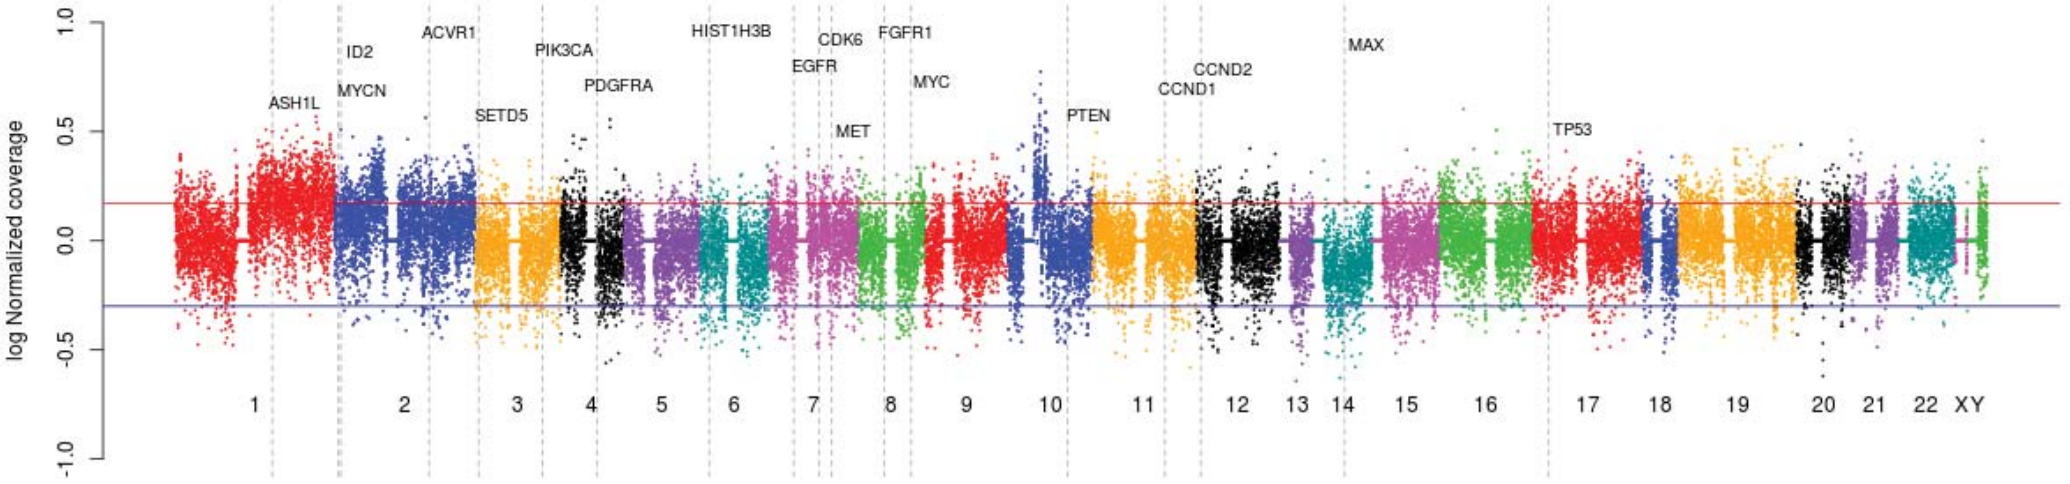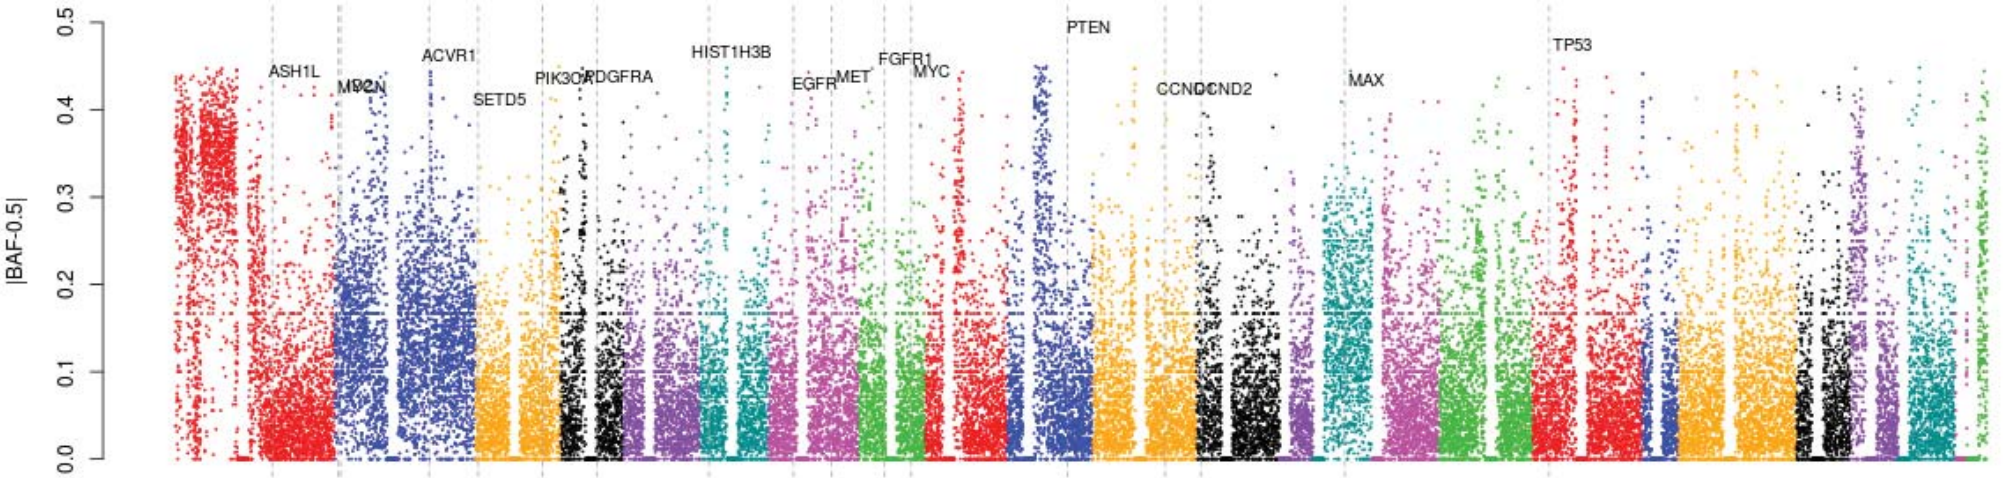

### DIPG2-Temporal Lobe 3

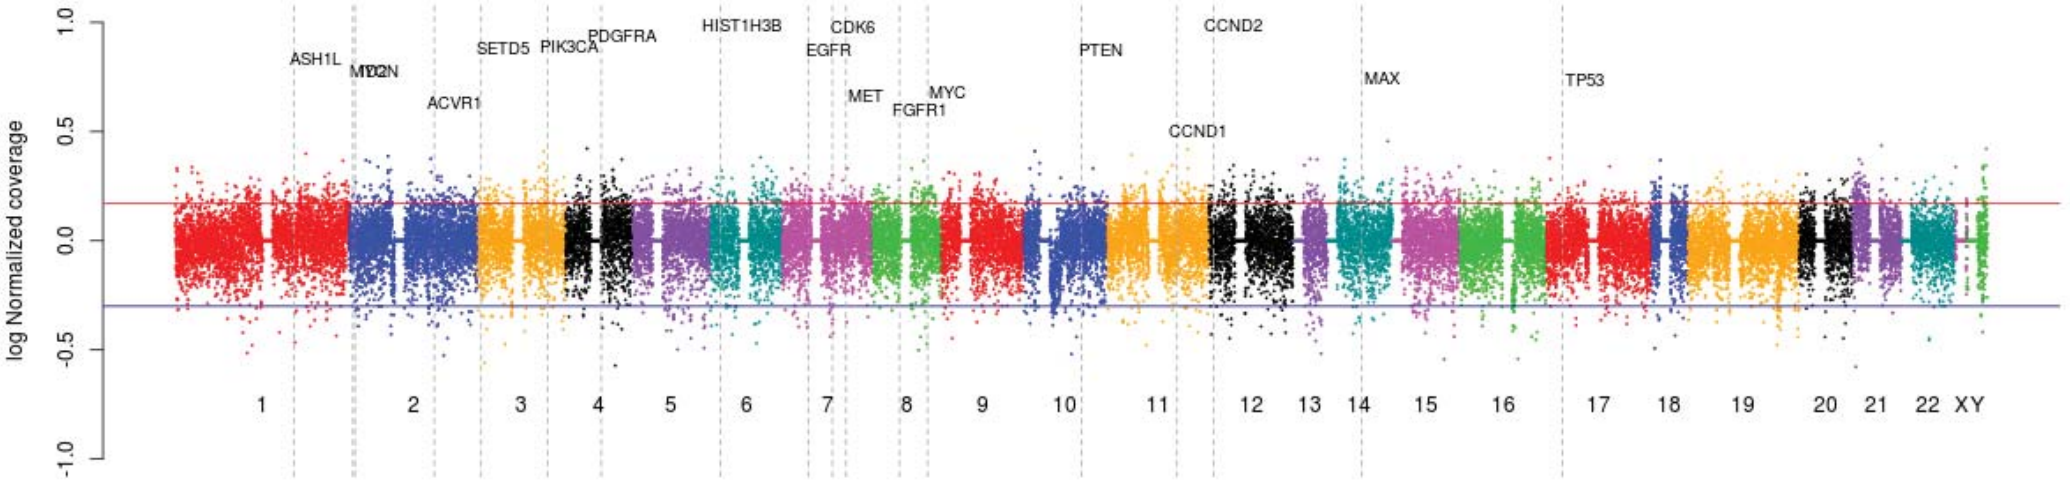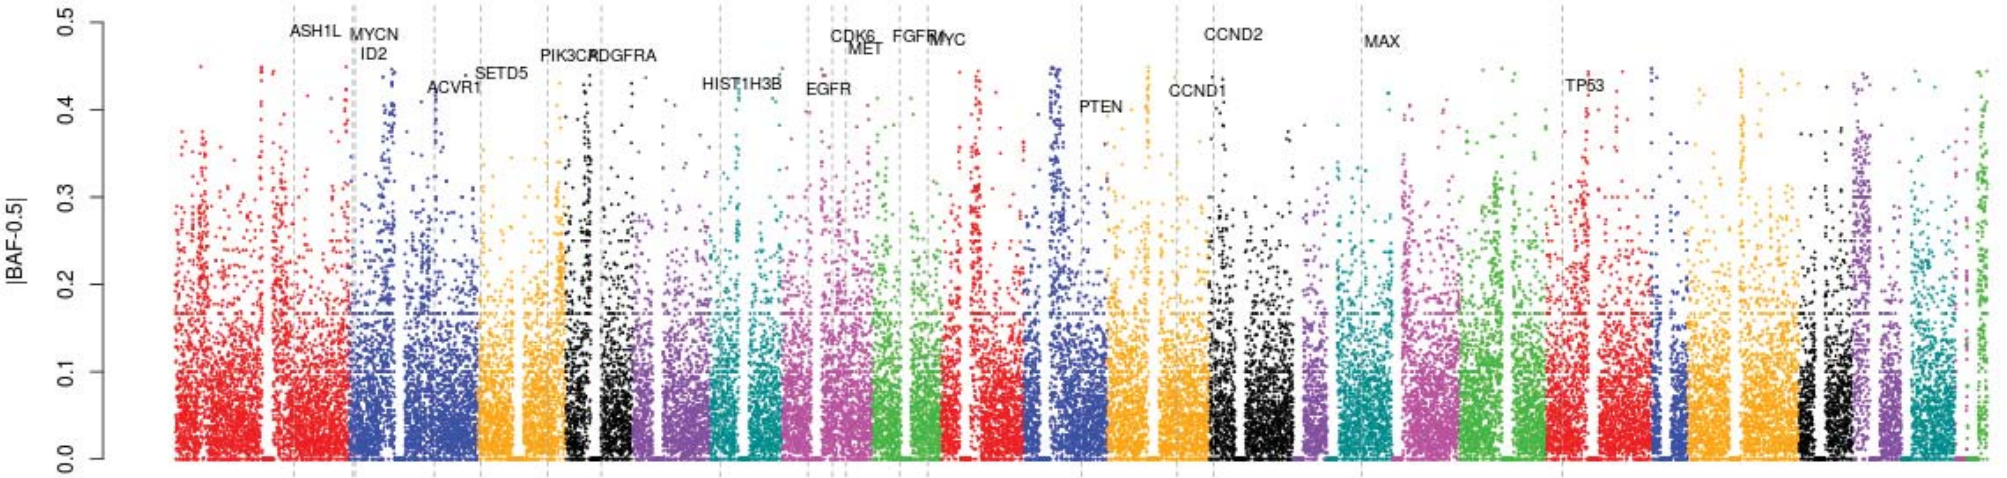



### DIPG2-Thalamus

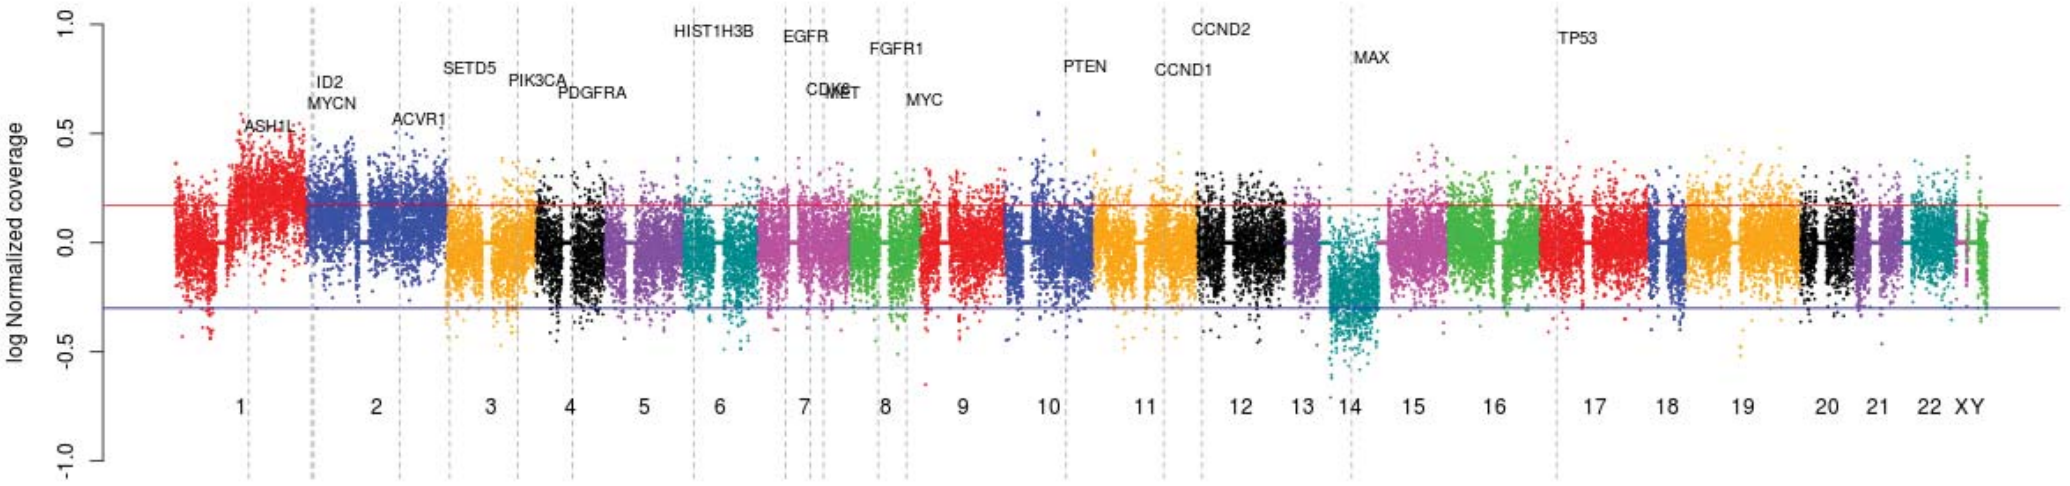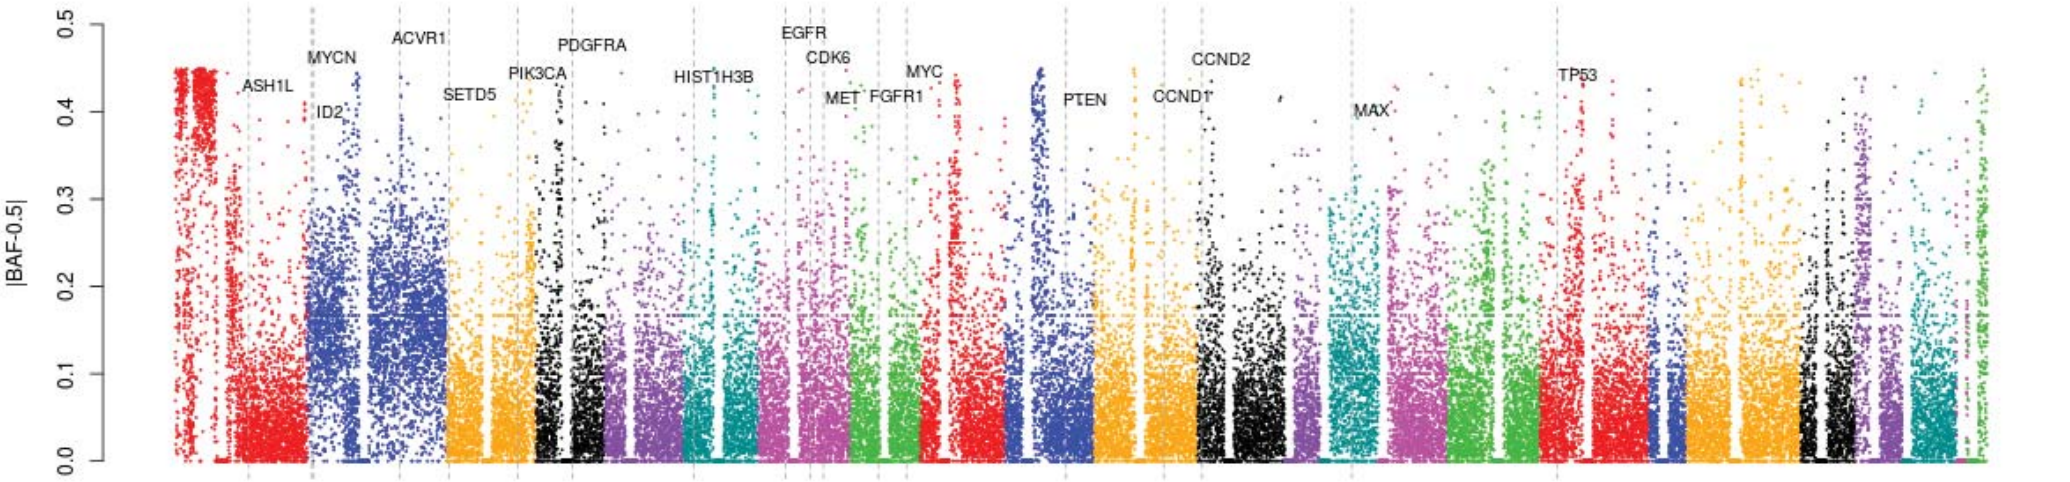



### DIPG3-Pons 1

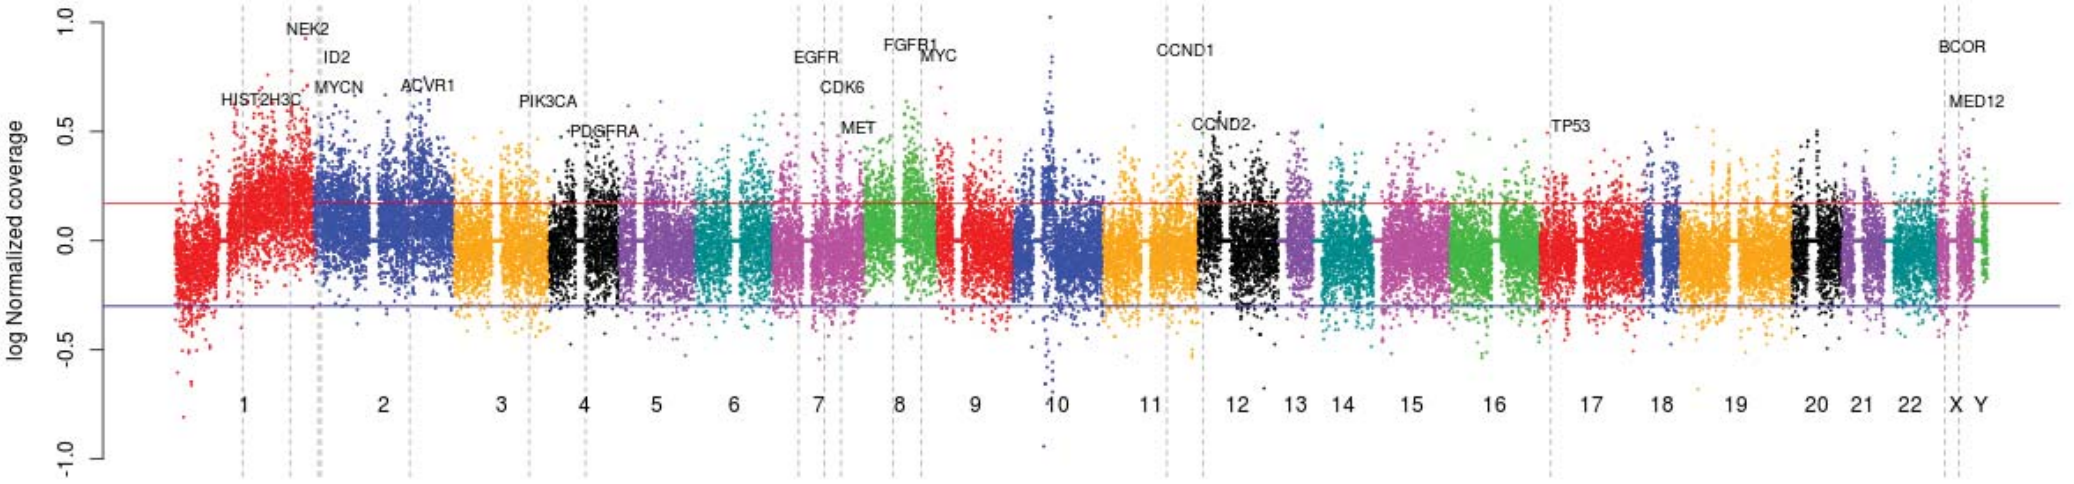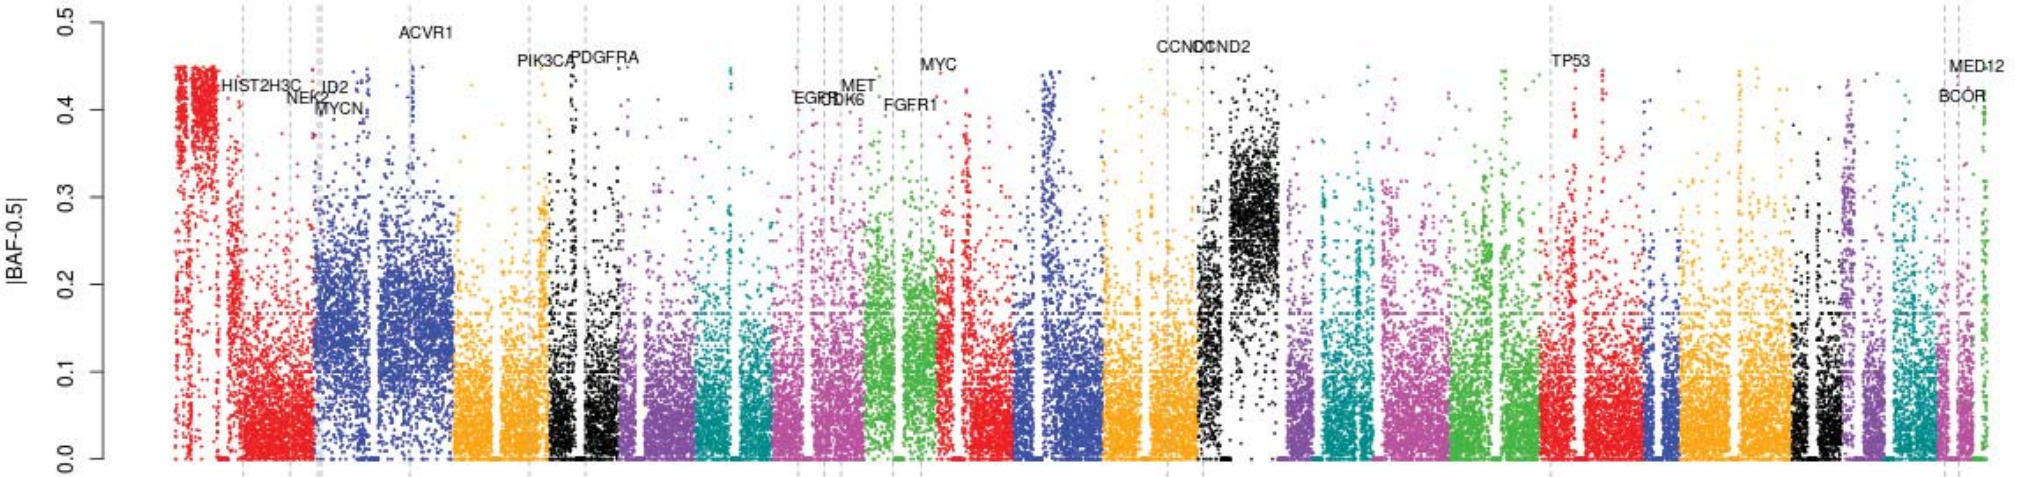



### DIPG3-Pons 2

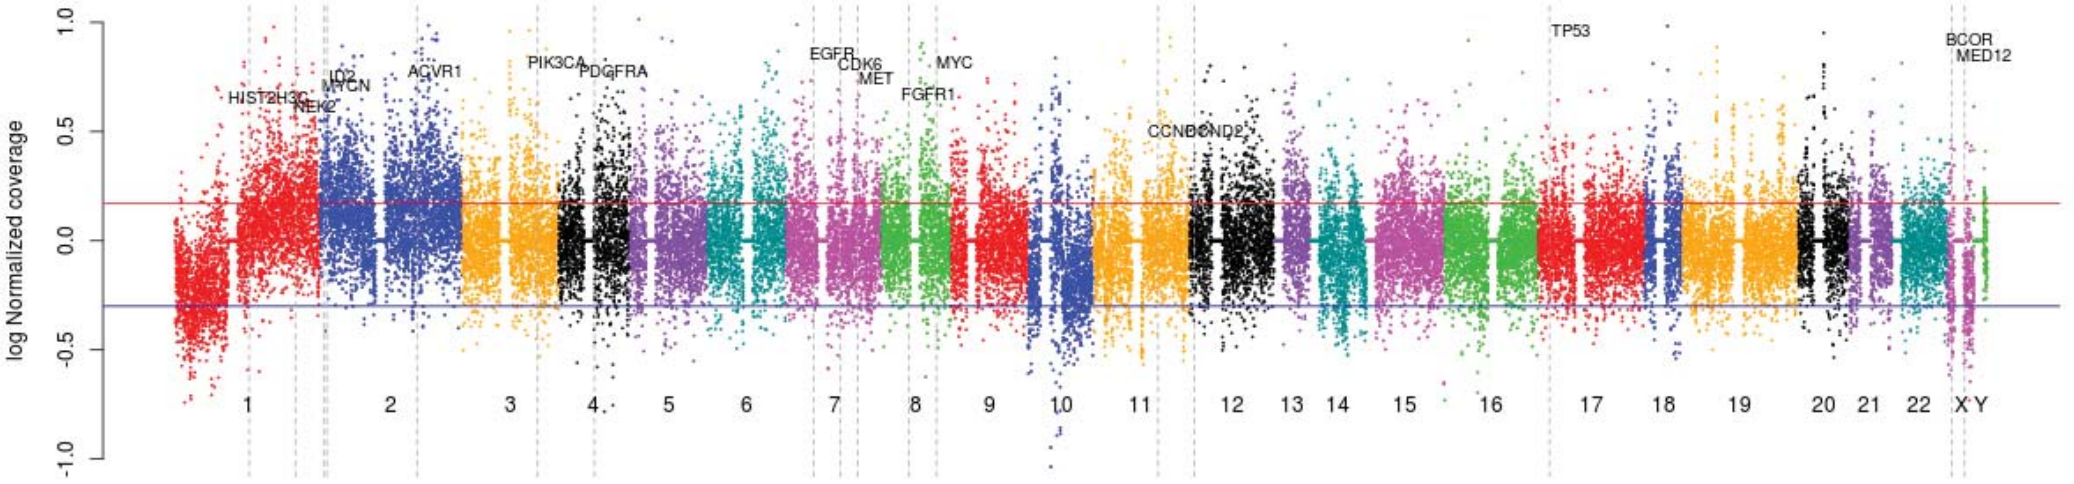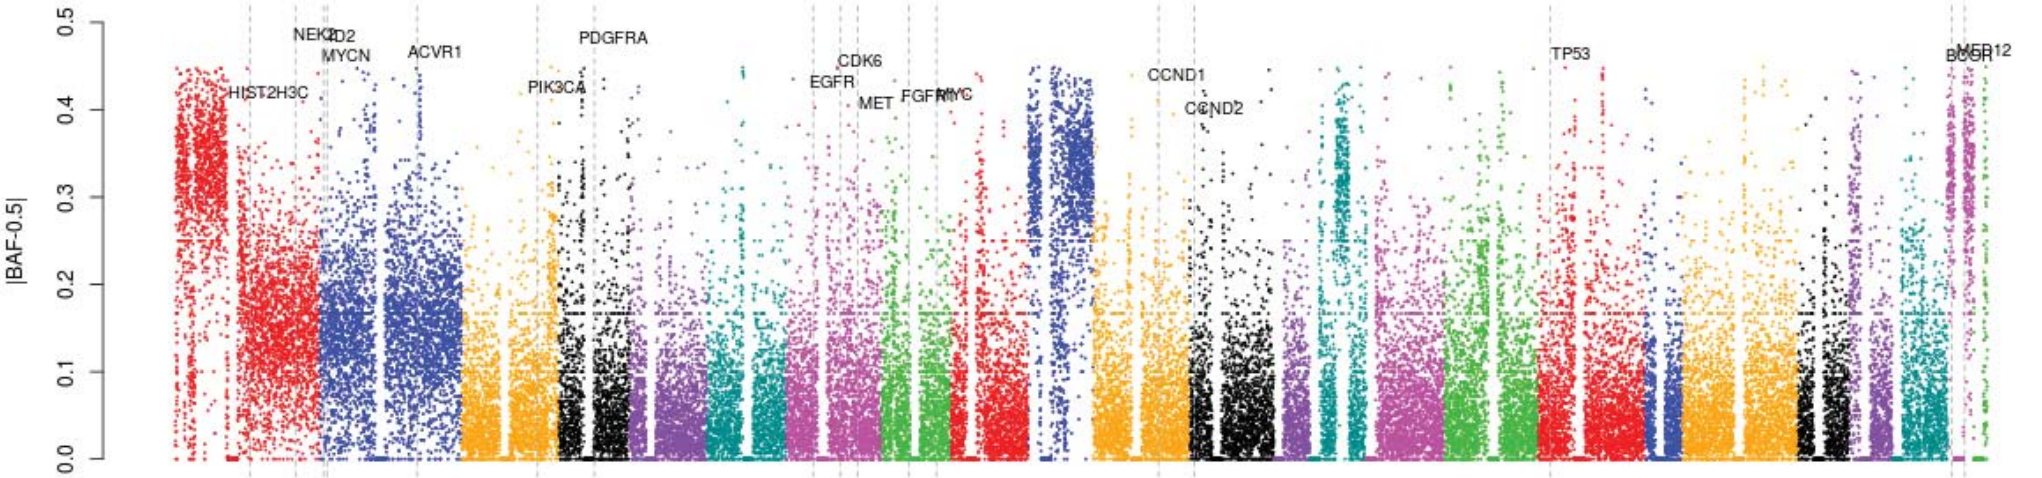



### DIPG4-Pons 1

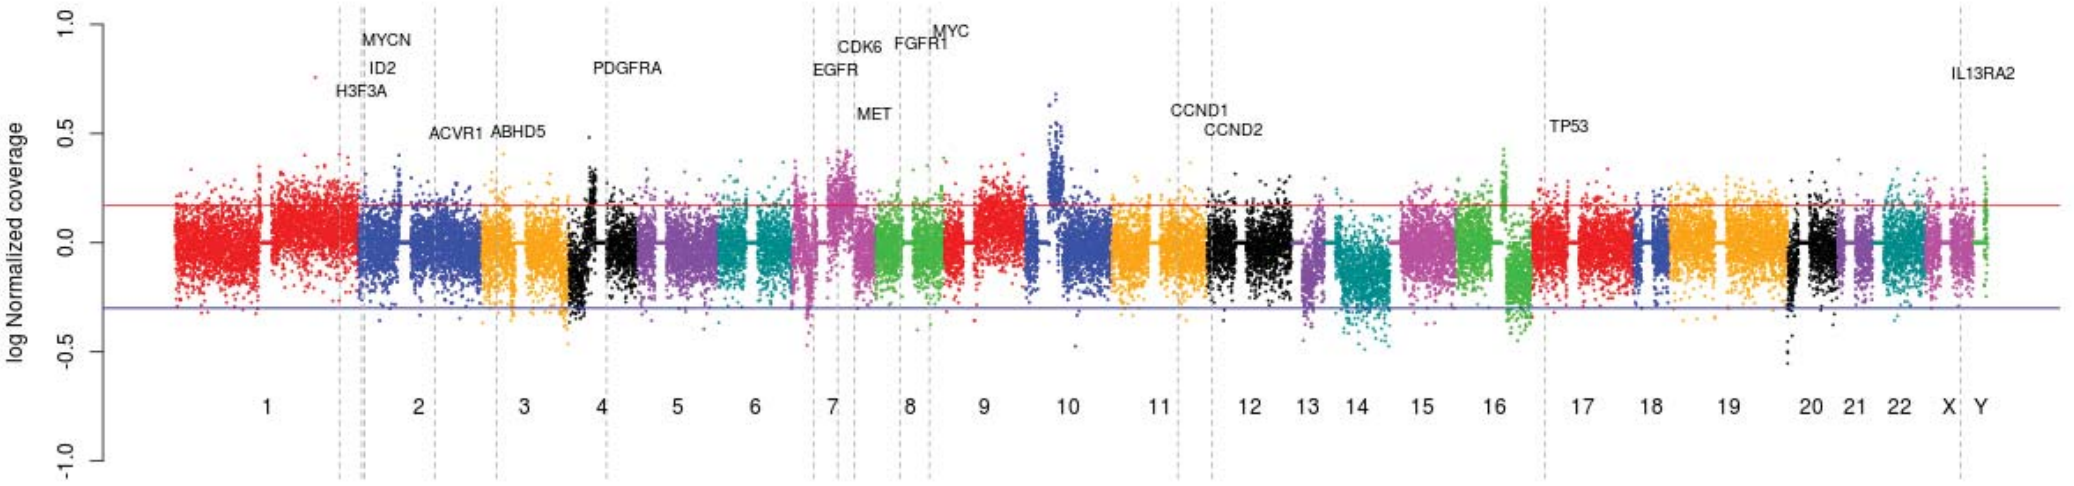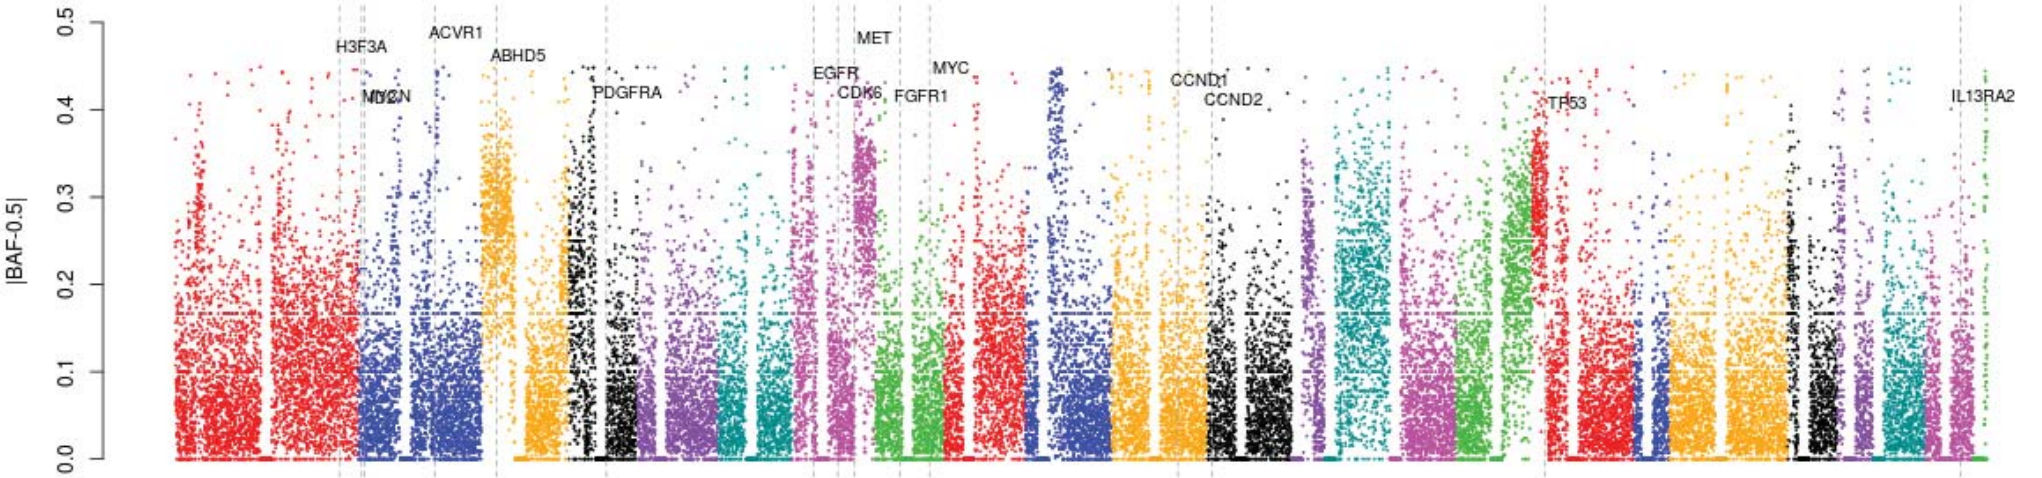



### DIPG5-Medulla

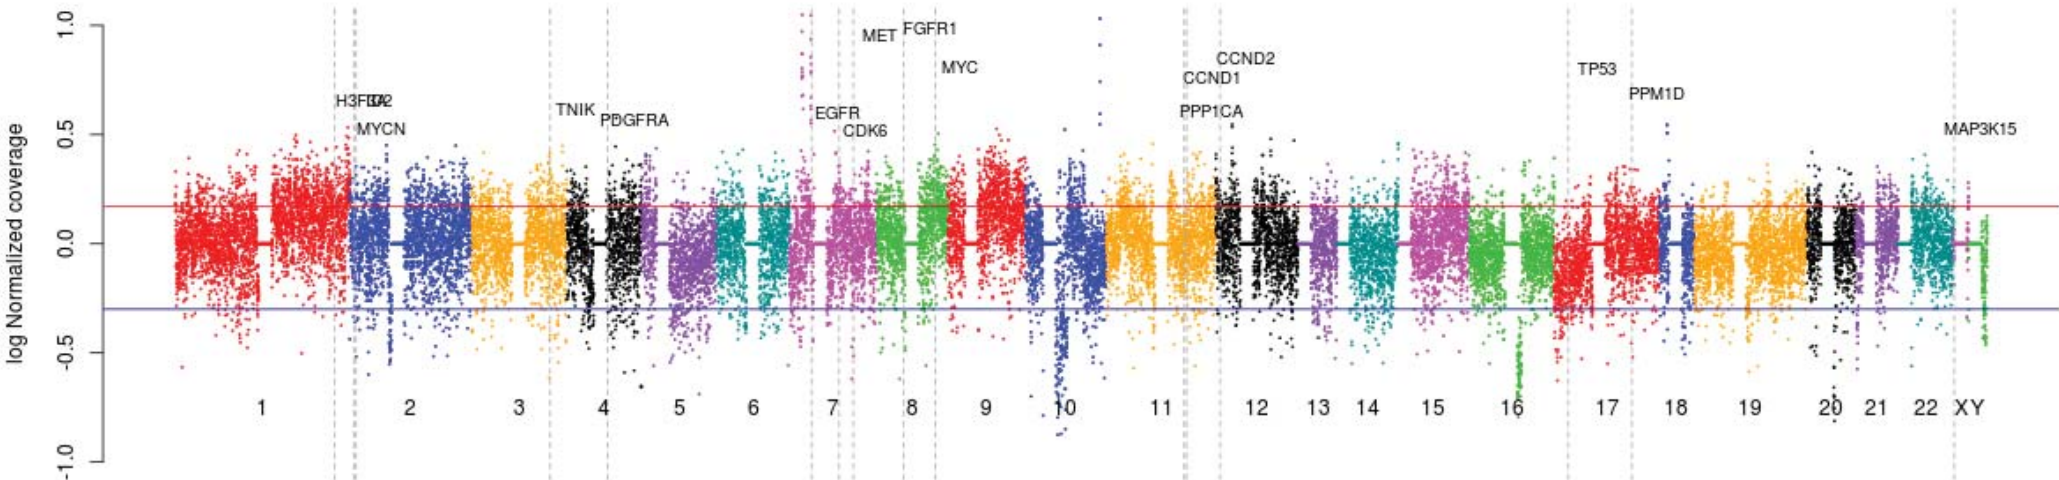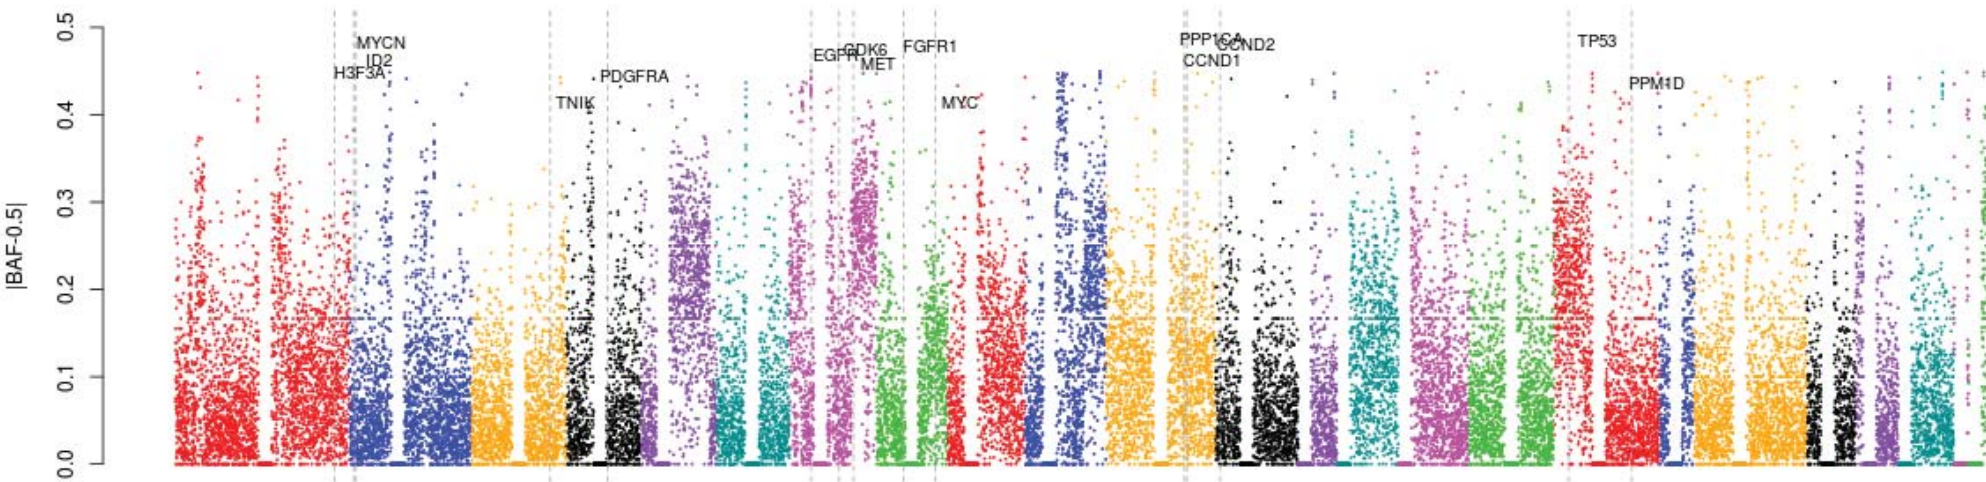

### DIPG5-Midbrain 1

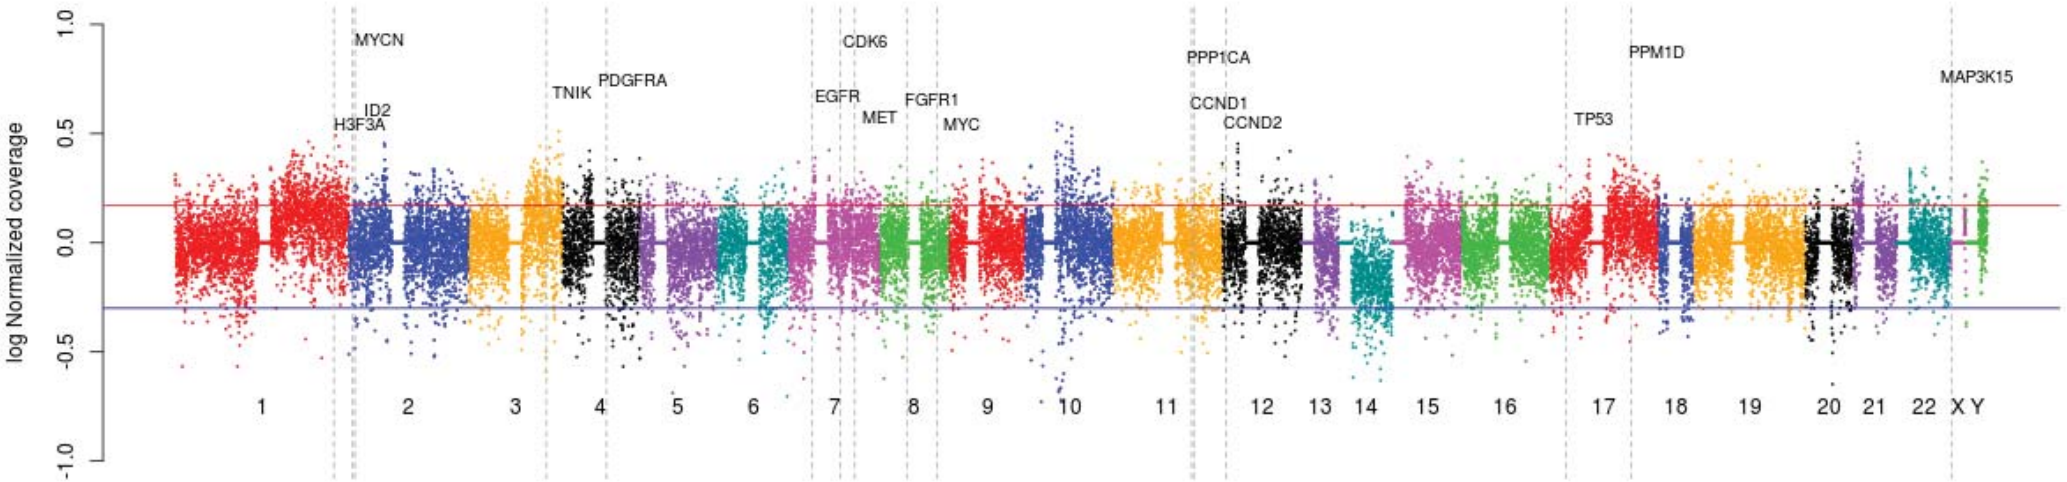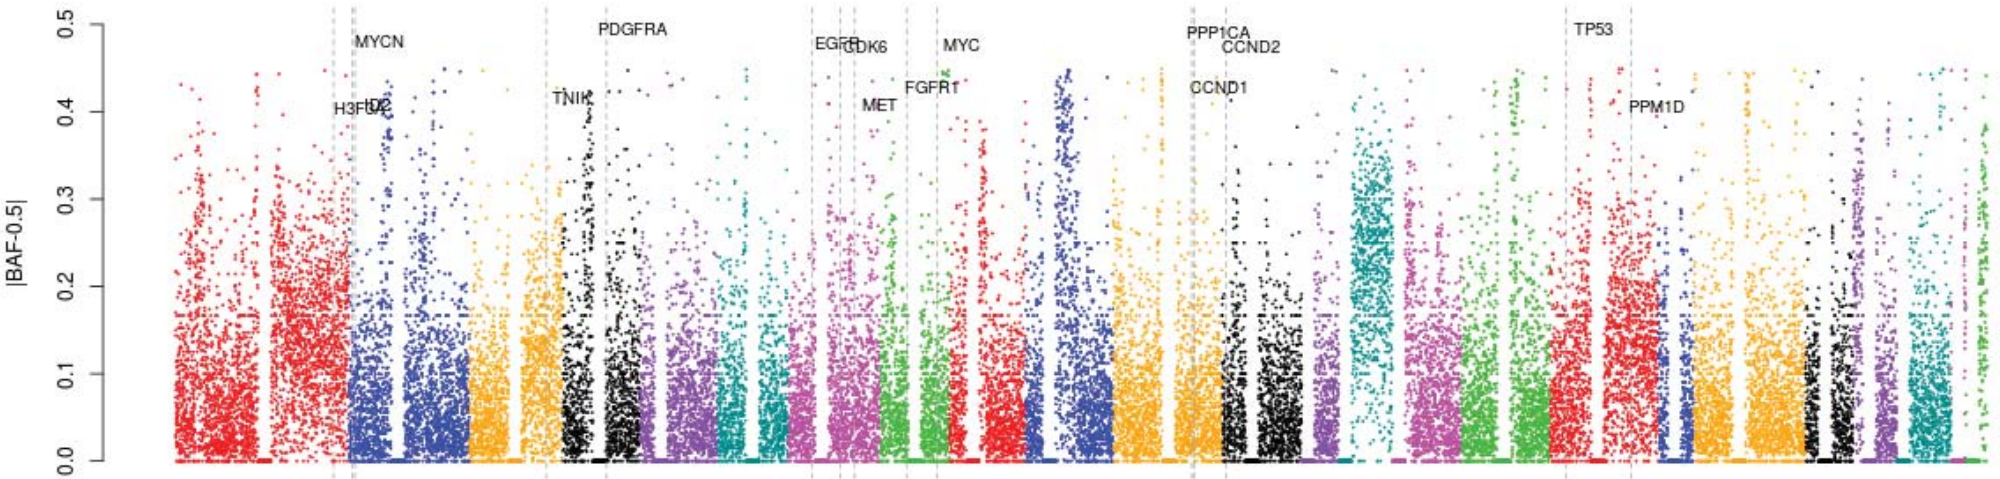



### DIPG5-Pons 1

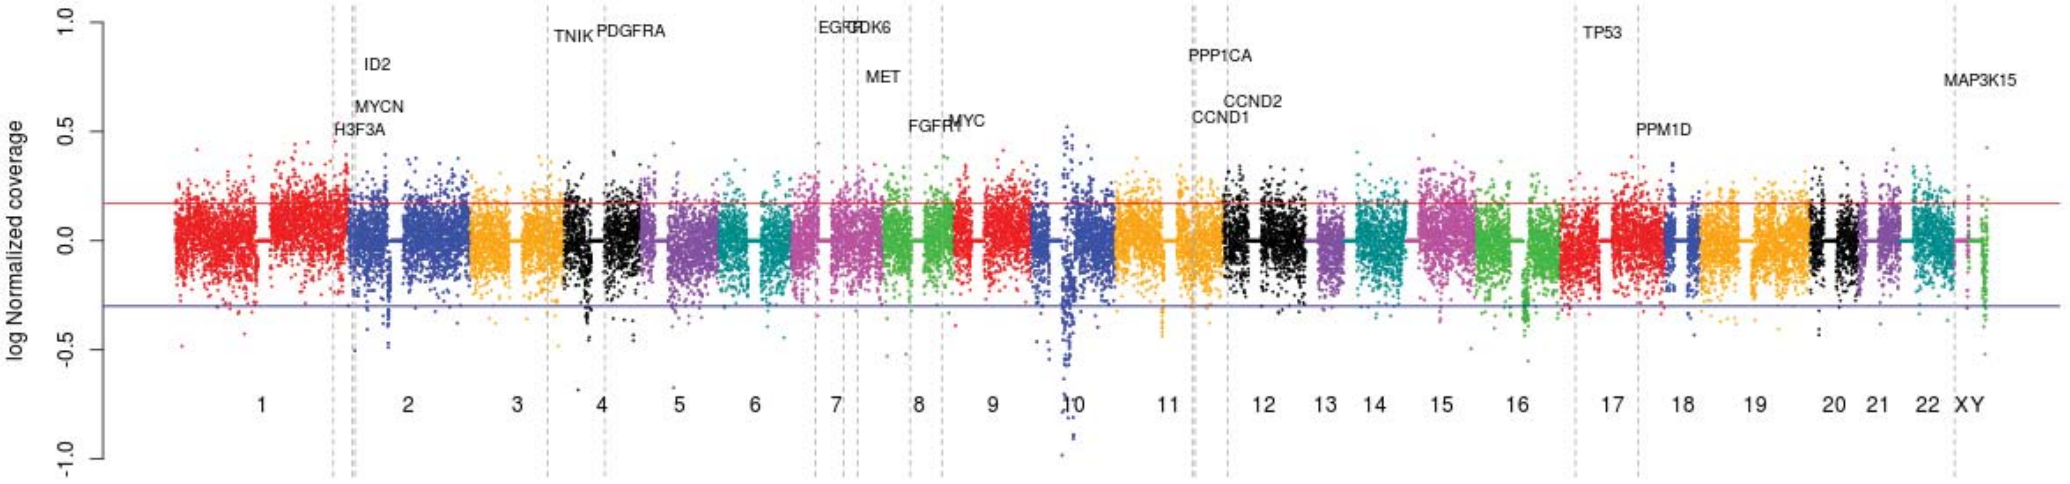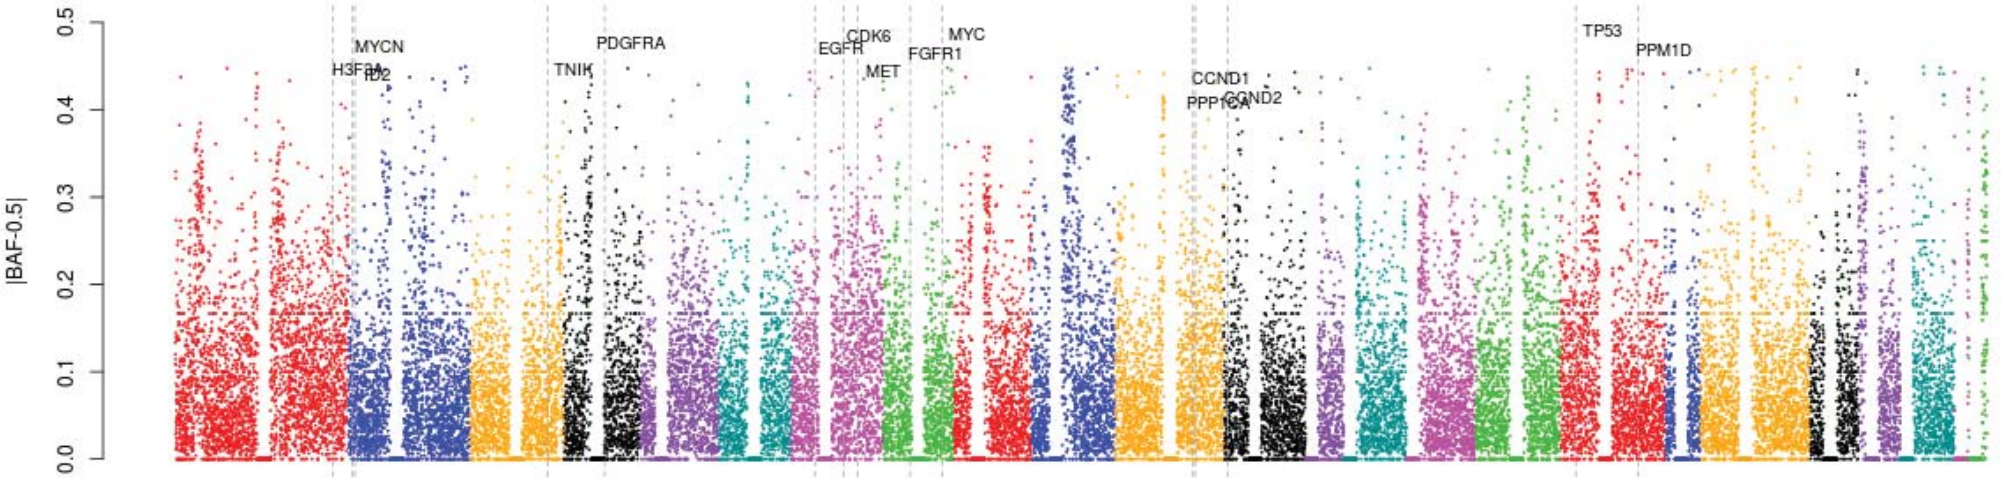

### DIPG6-Midbrain

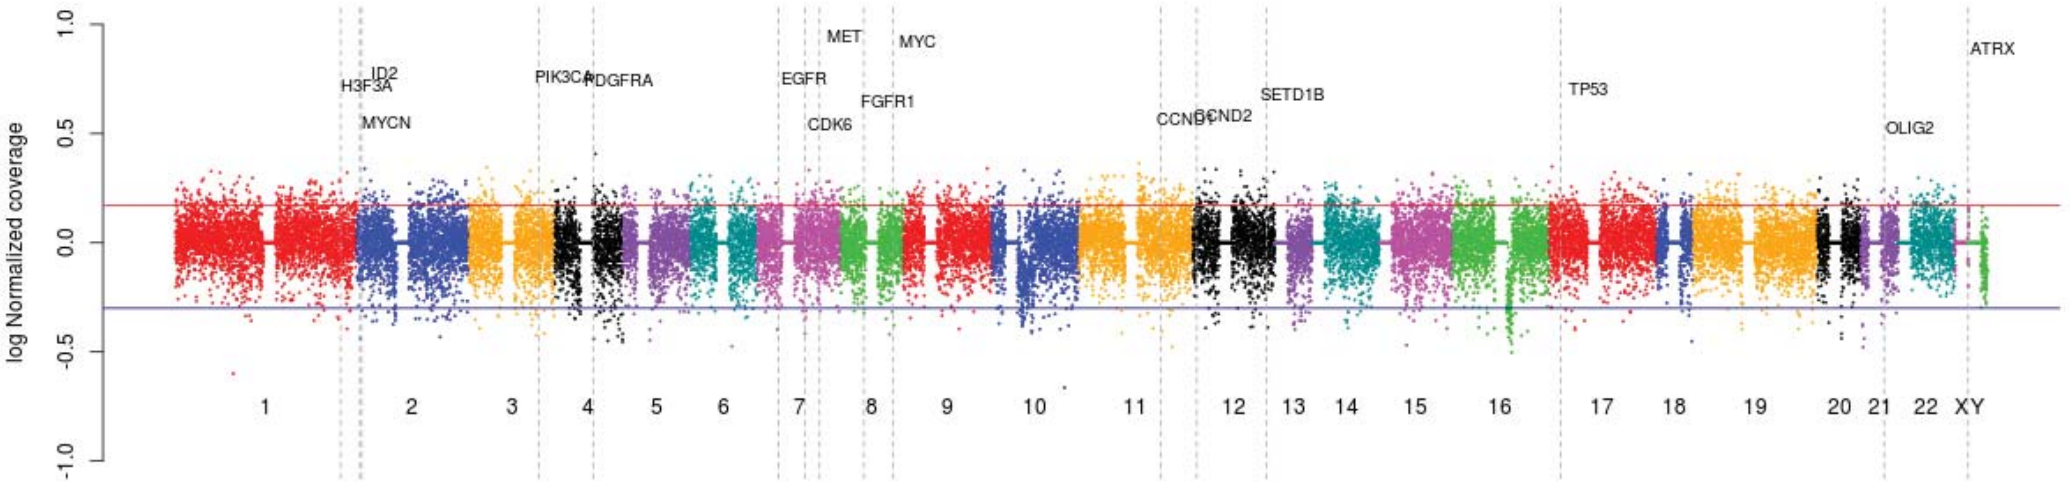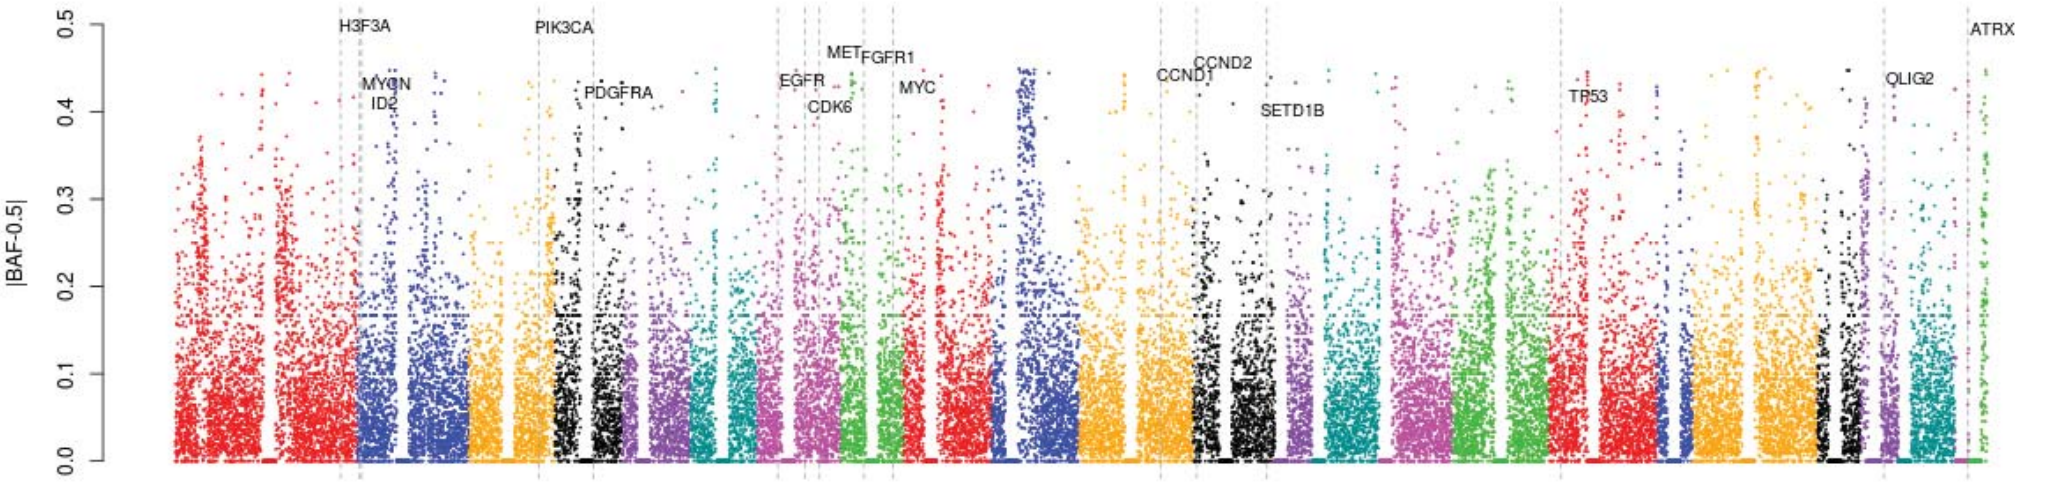



### DIPG6-Pons 1

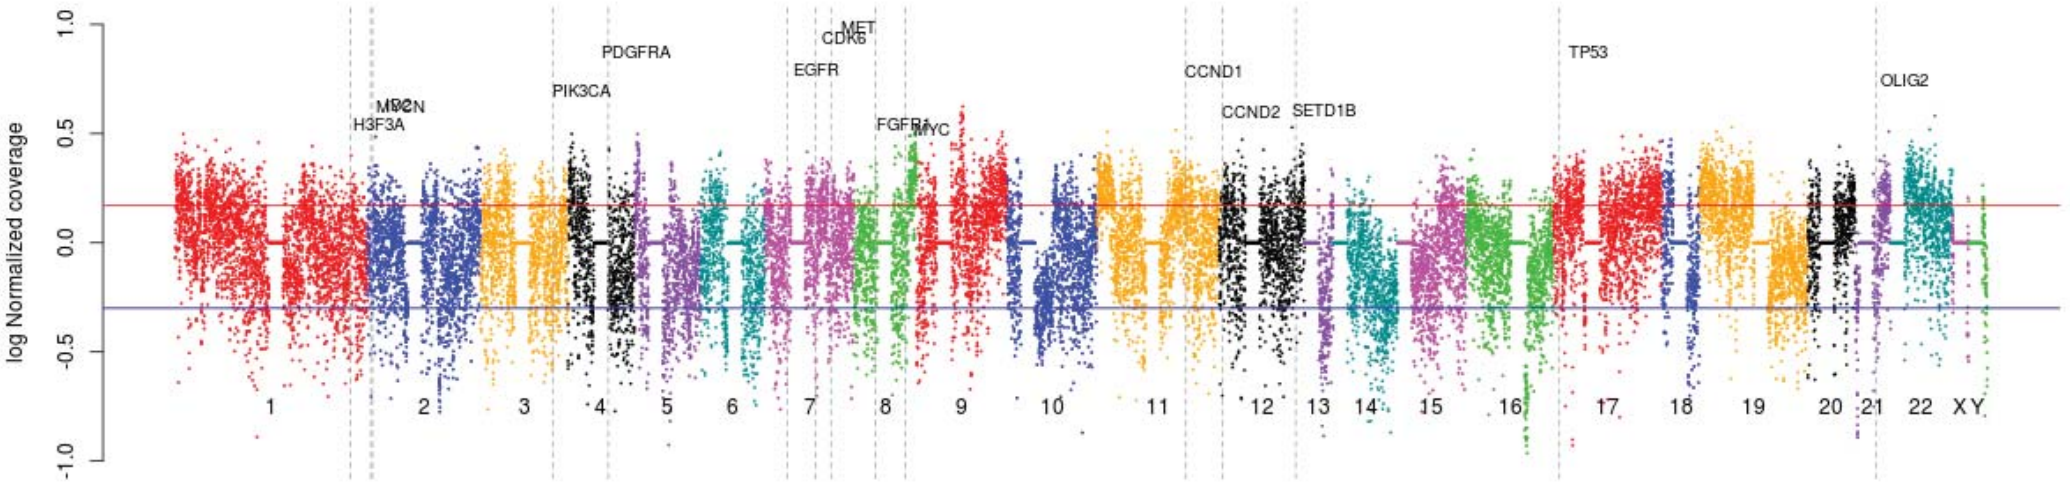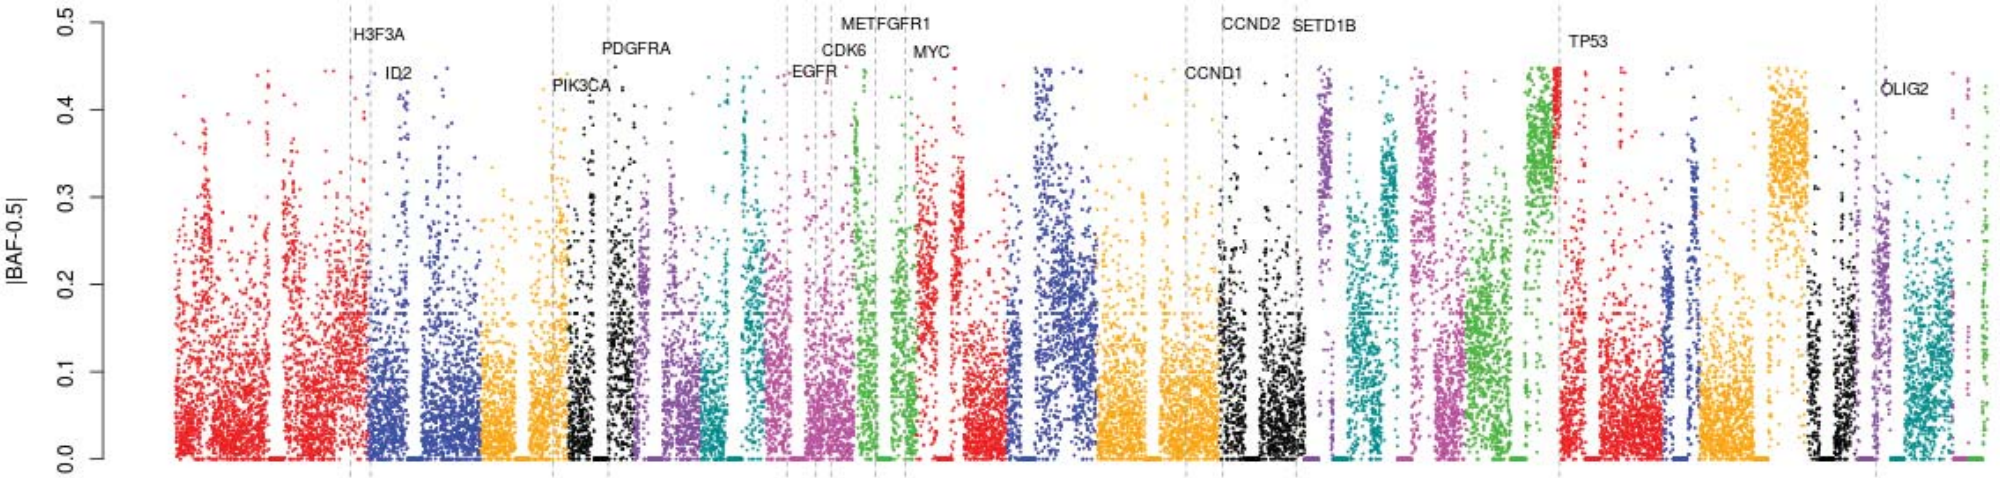



### DIPG6-Pons 2

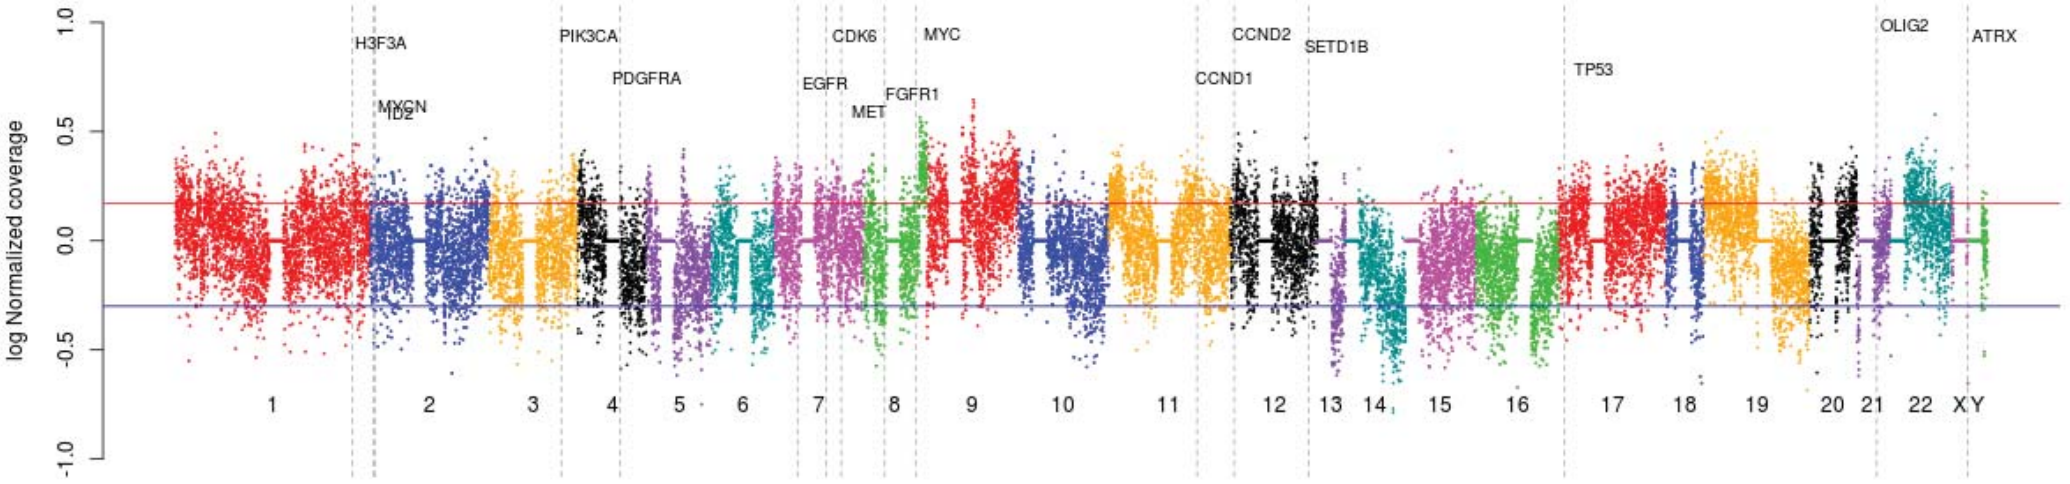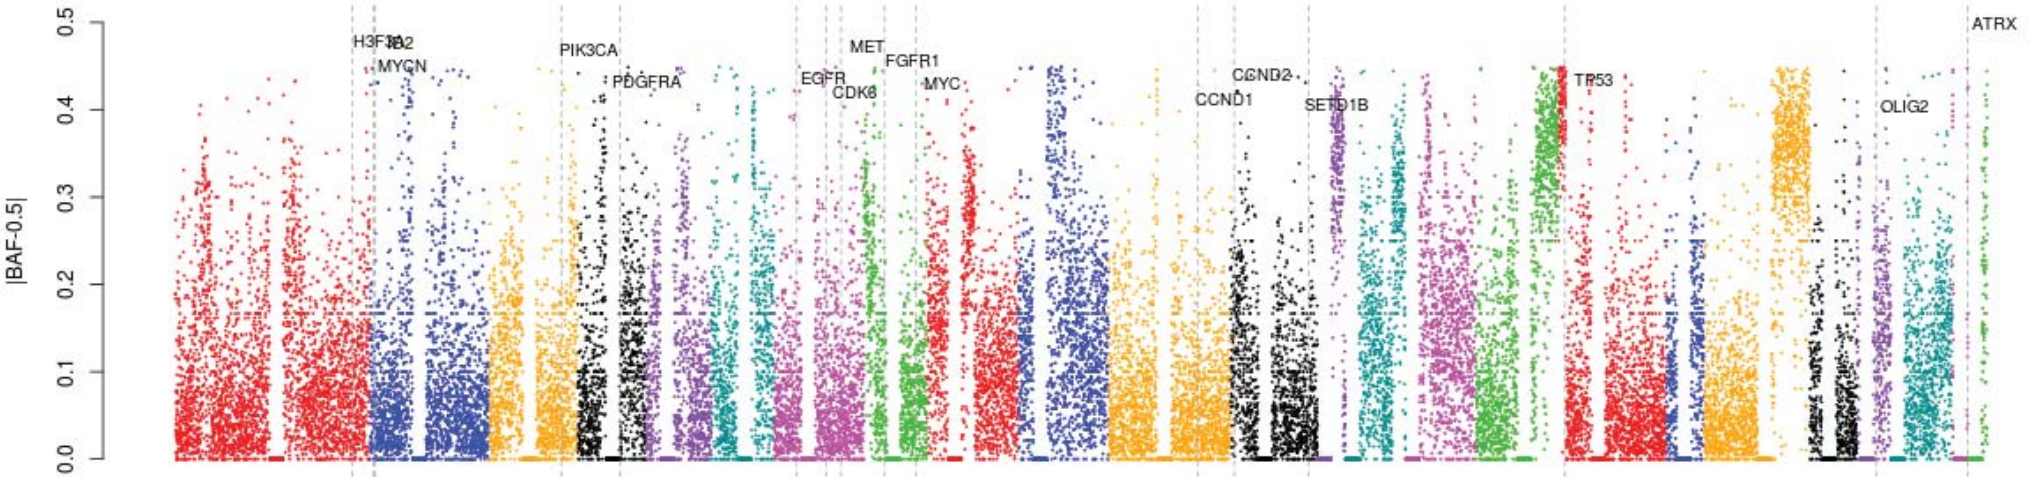



### DIPG6-Pons 3

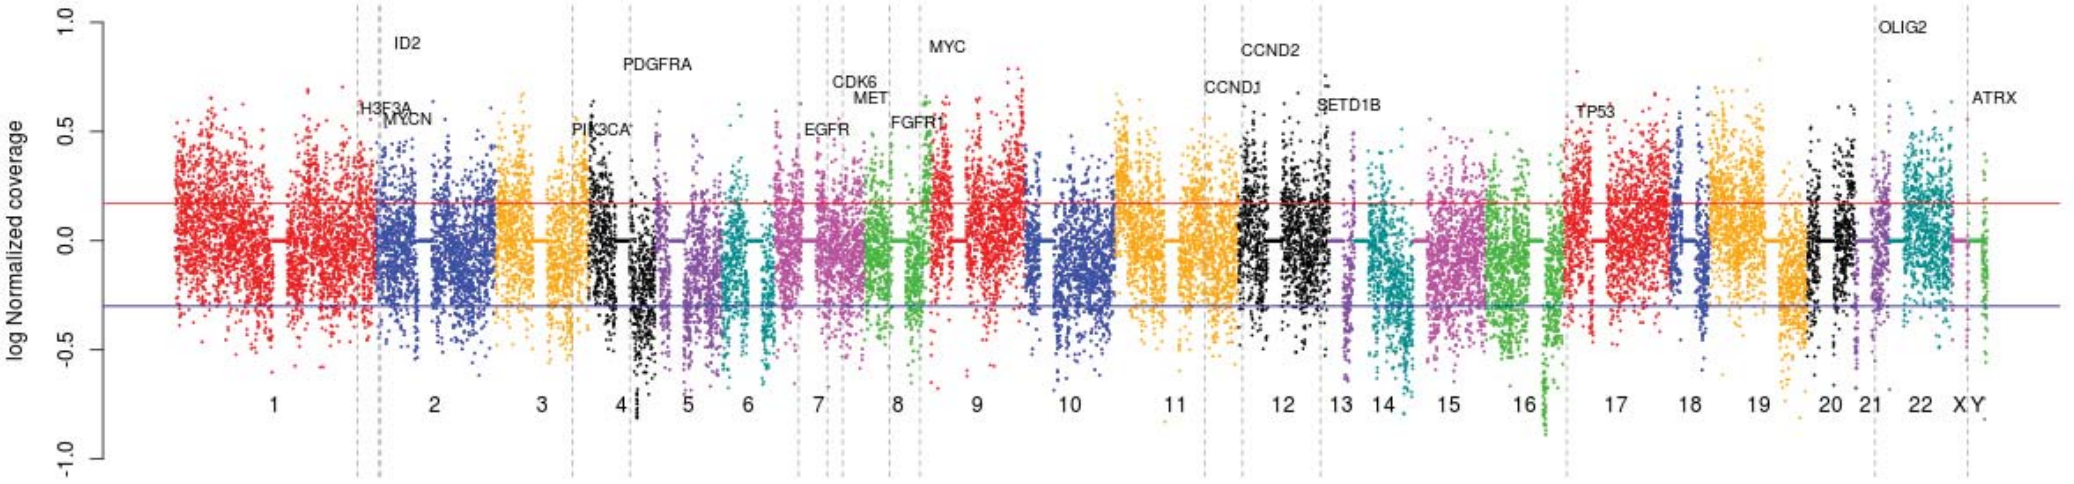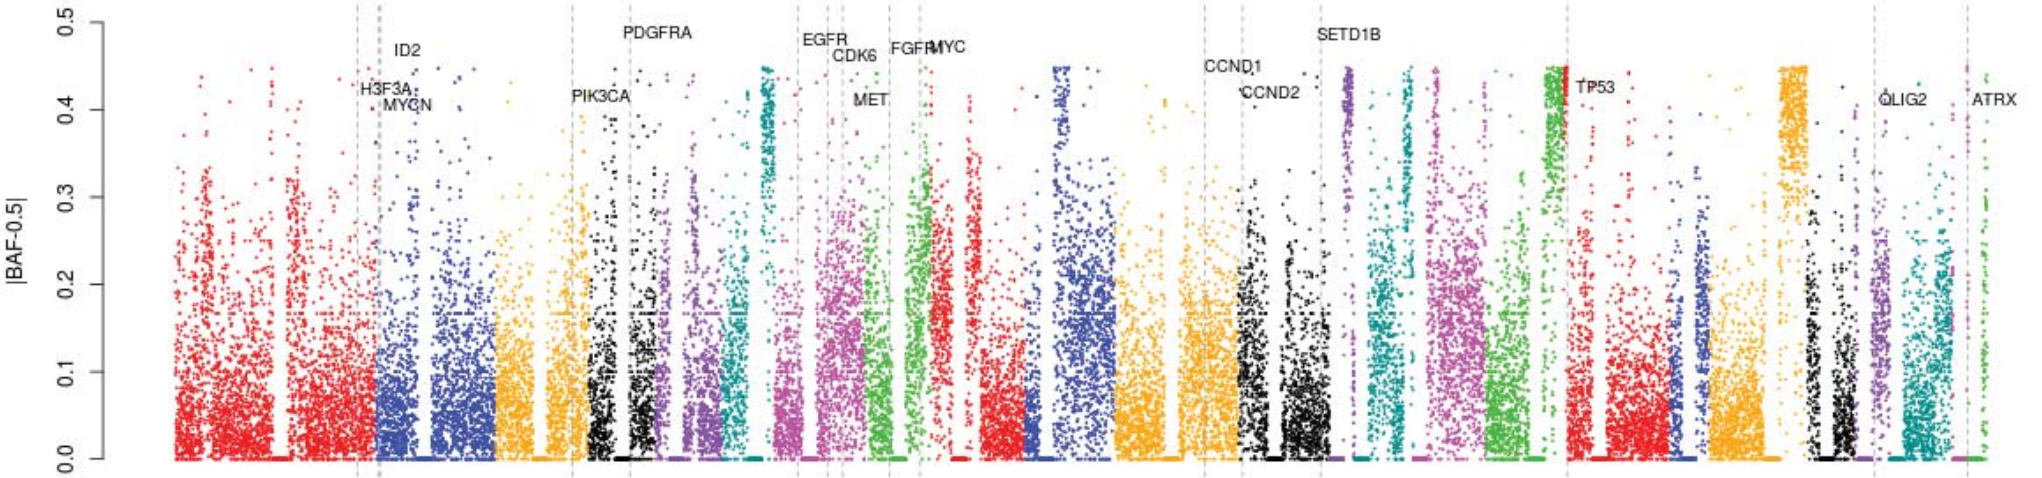



### DIPG6-Pons 4

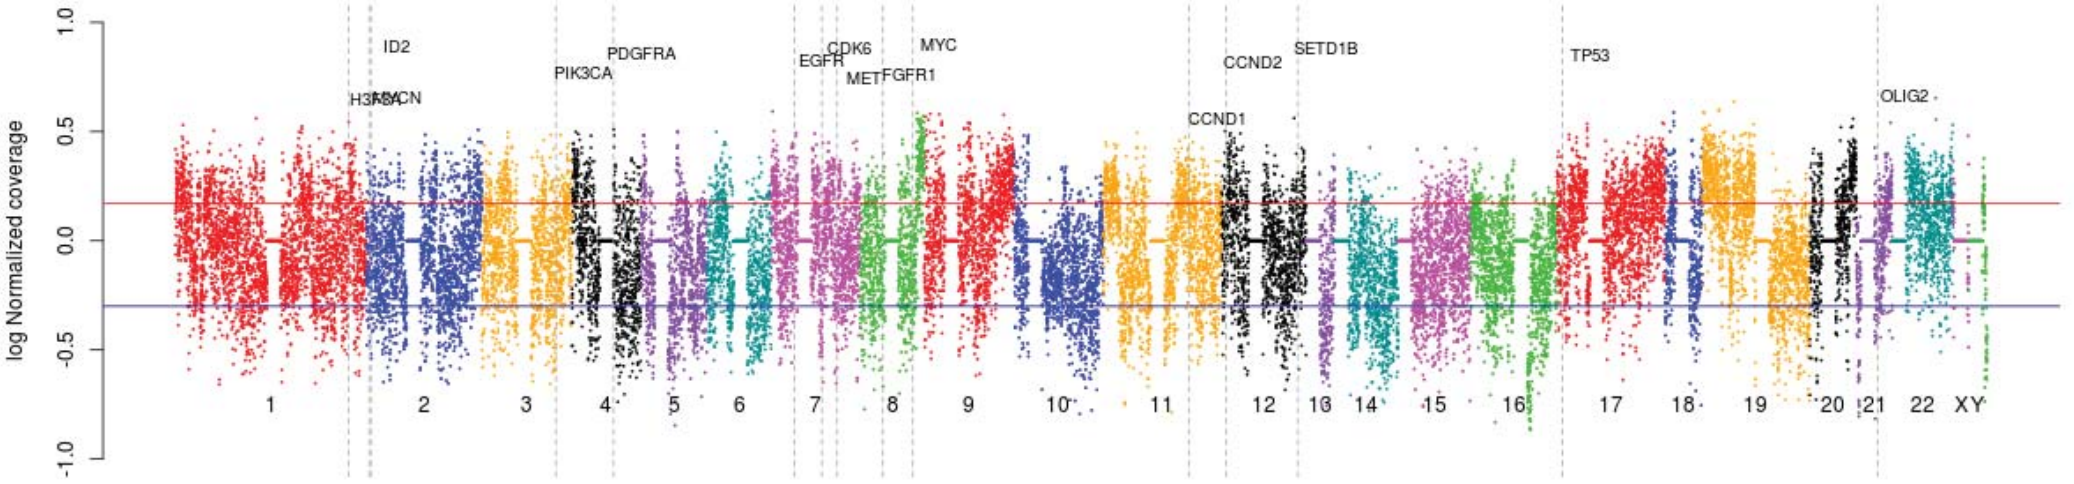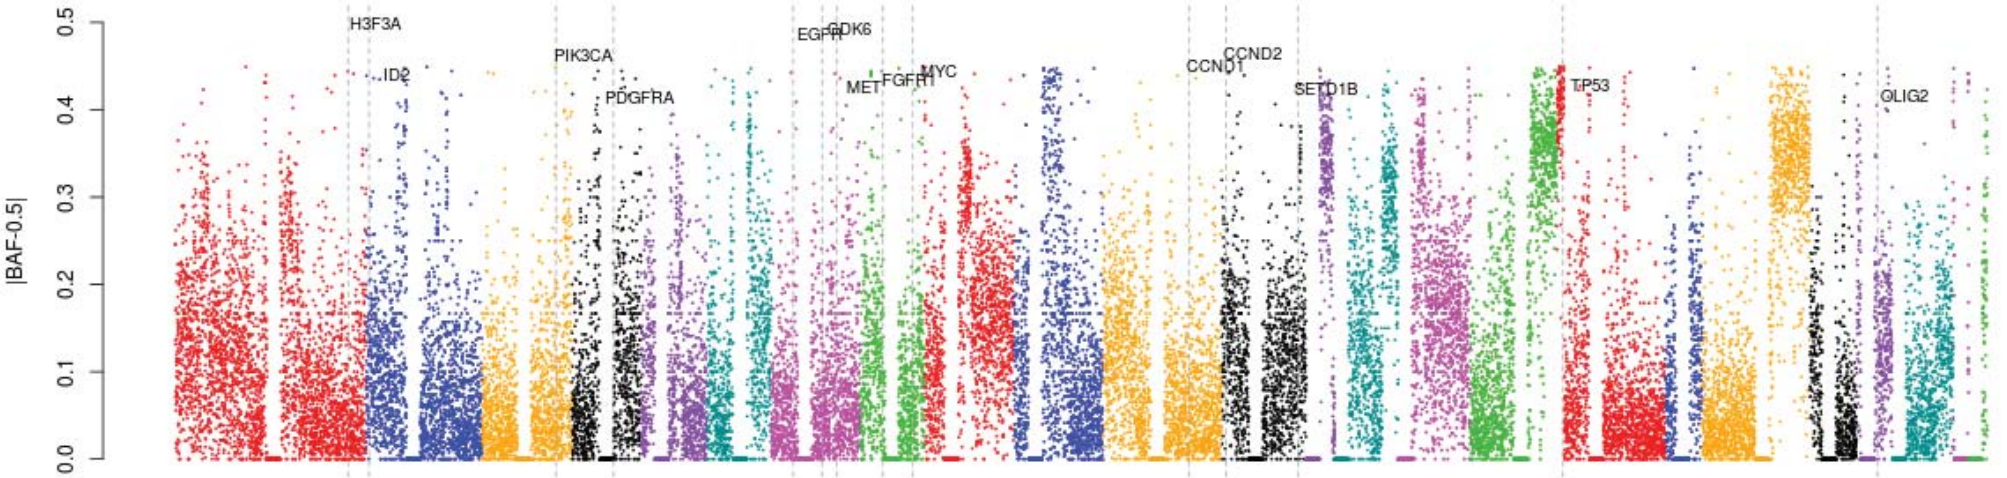



### DIPG6-Pons 5

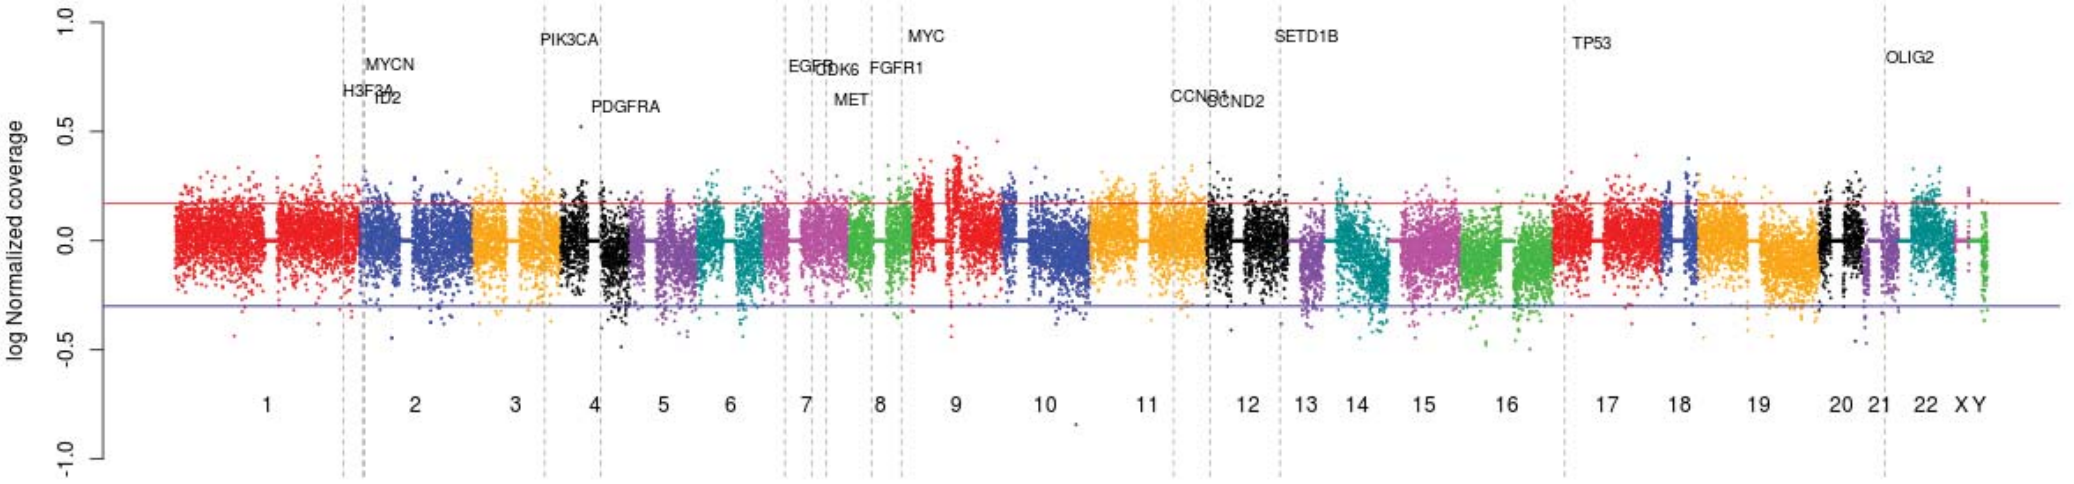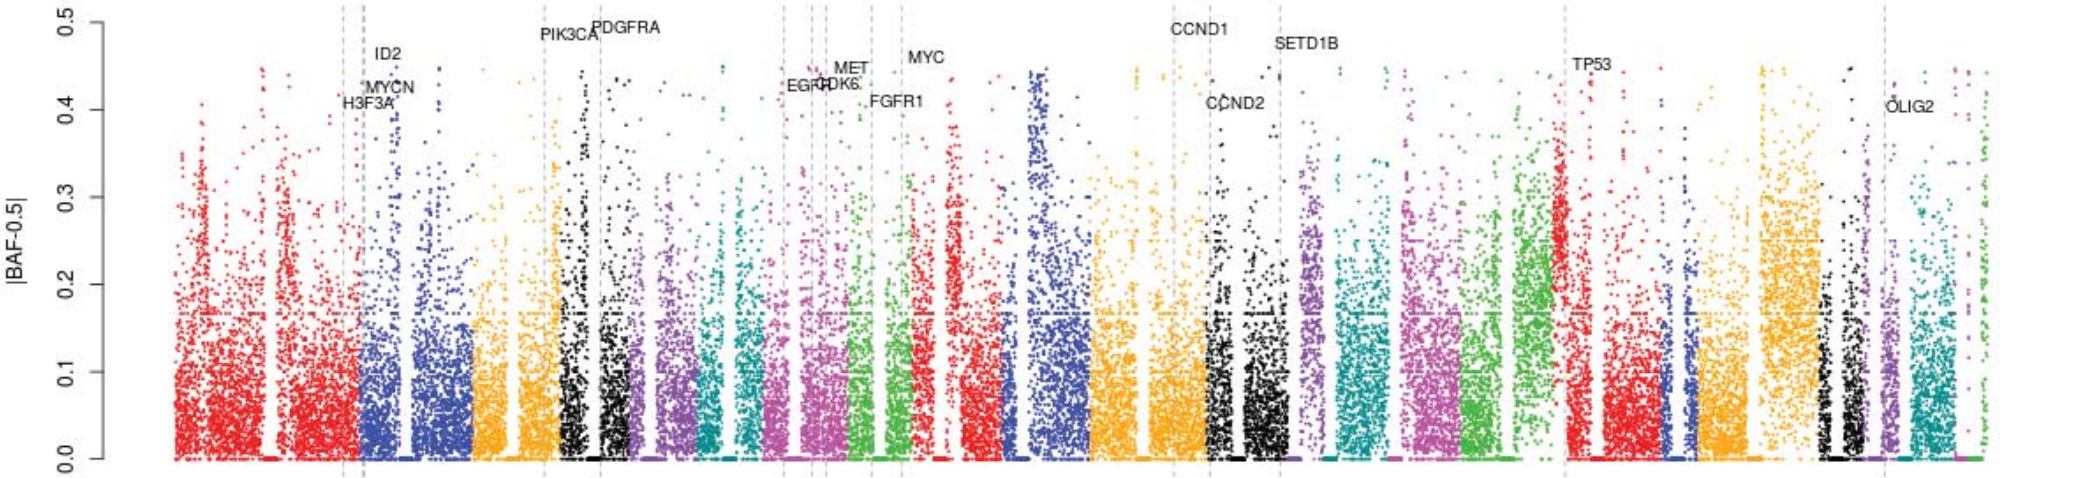

### DIPG7-Cerebellum 1

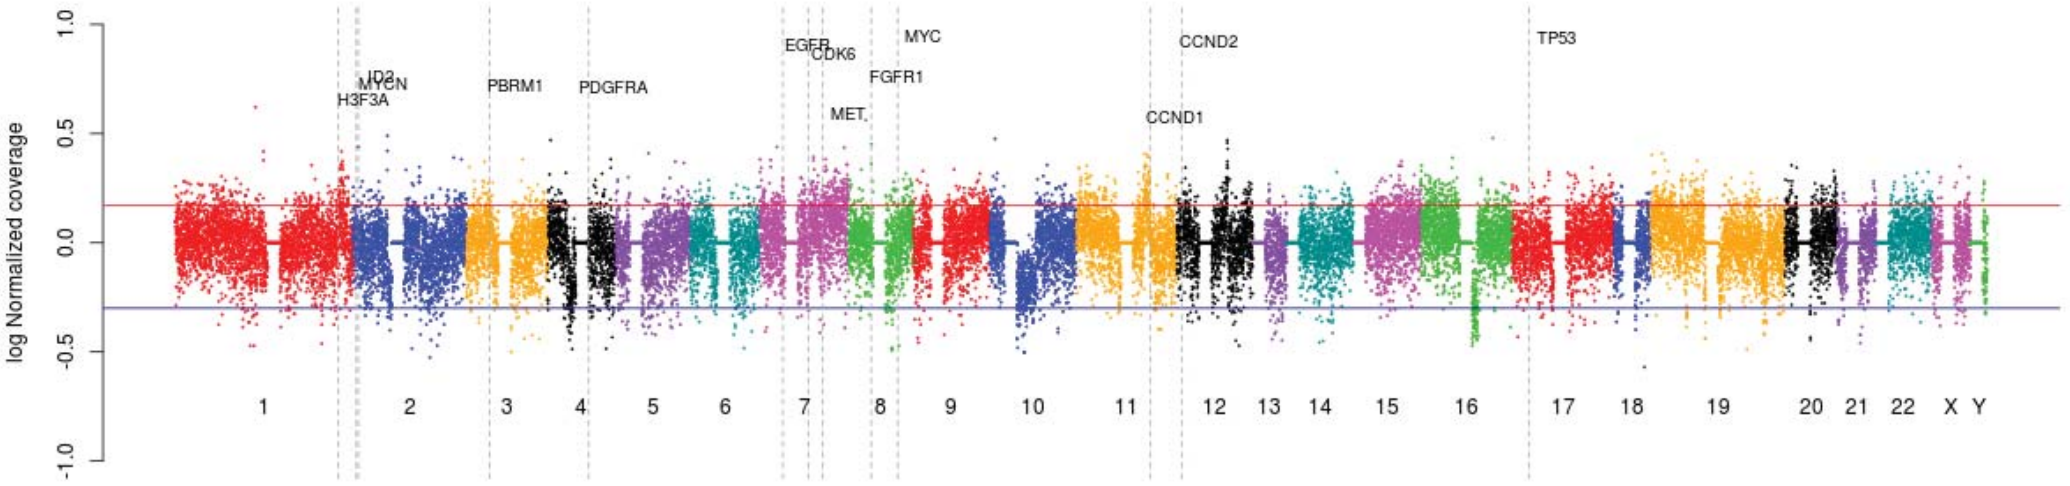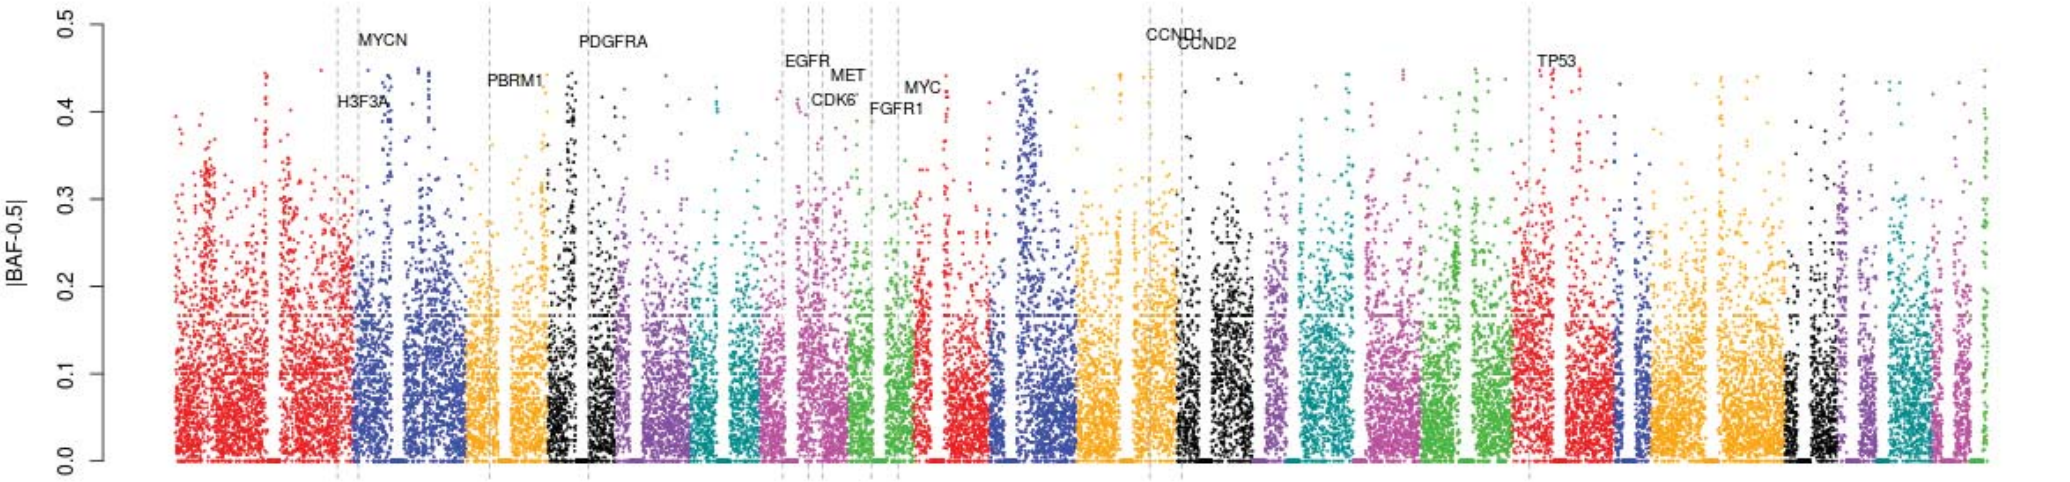



### DIPG7-Cerebellum 2

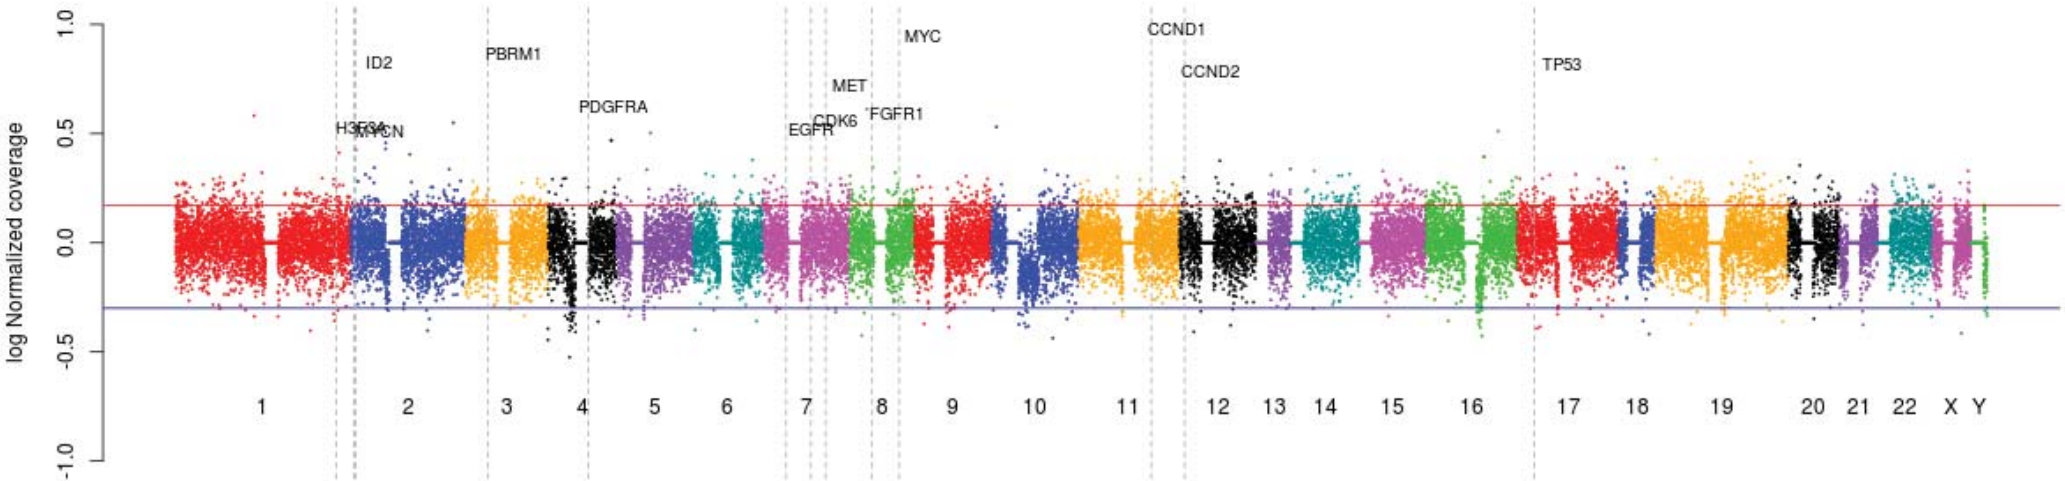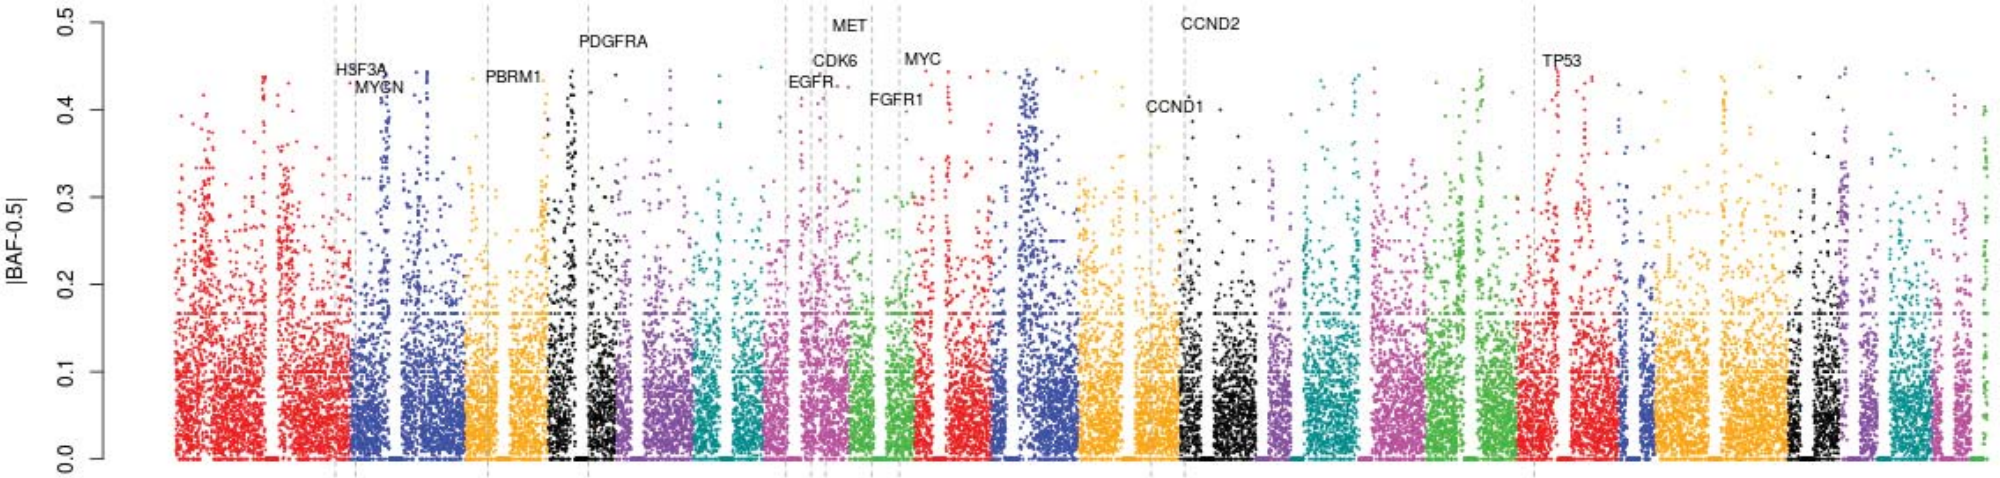

### DIPG7-Medulla

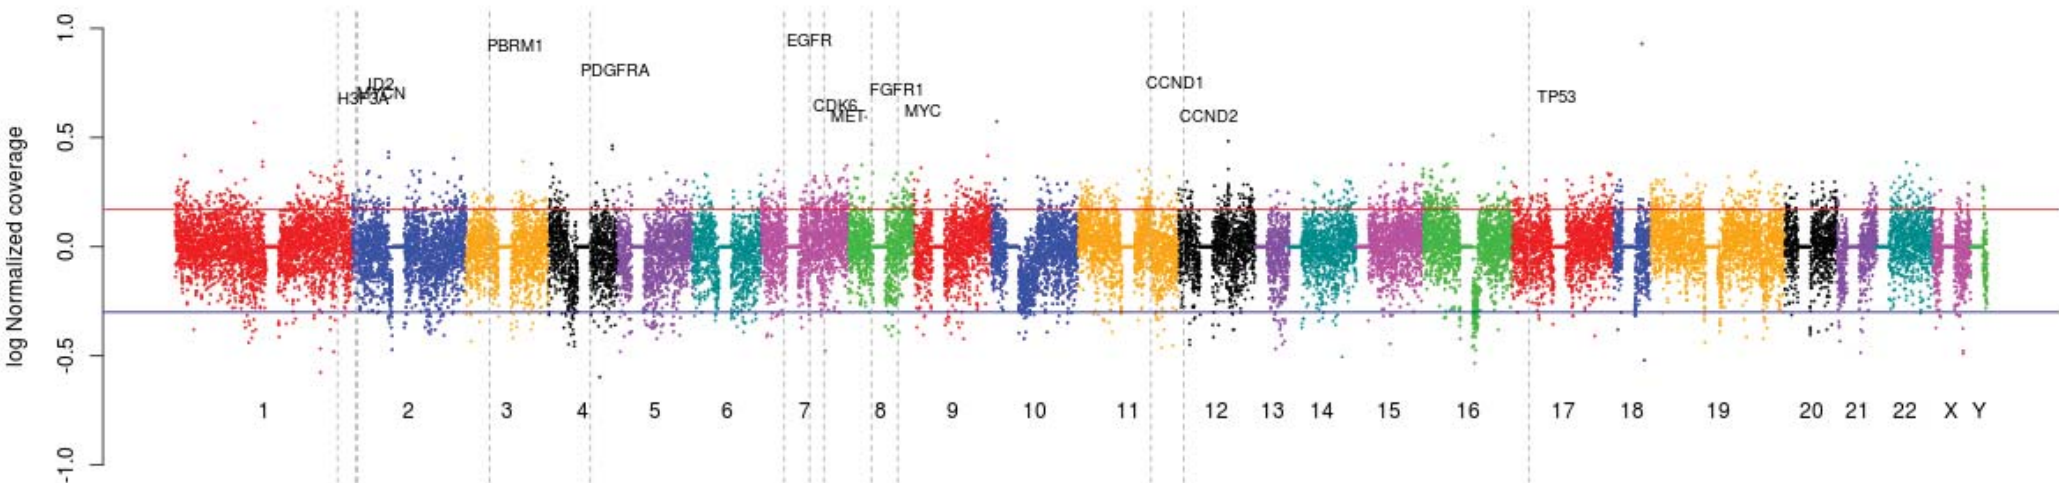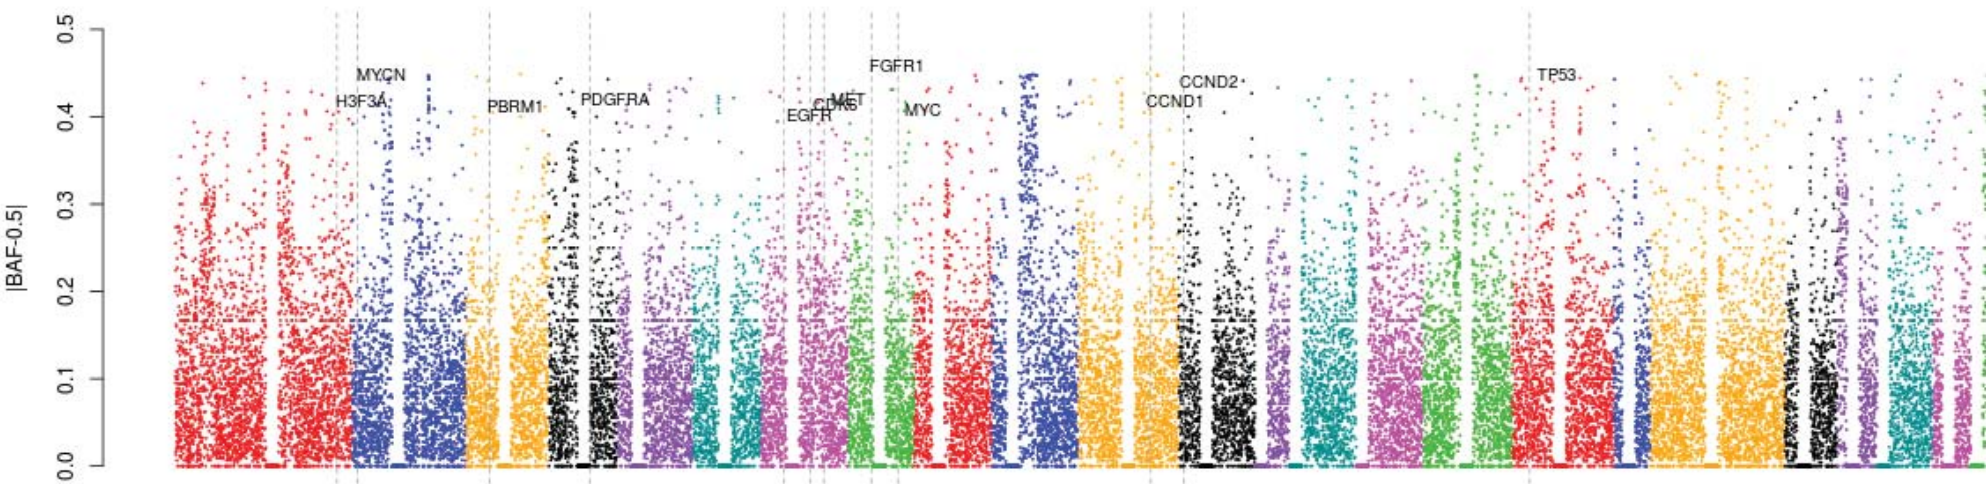



### DIPG7-Pons 1

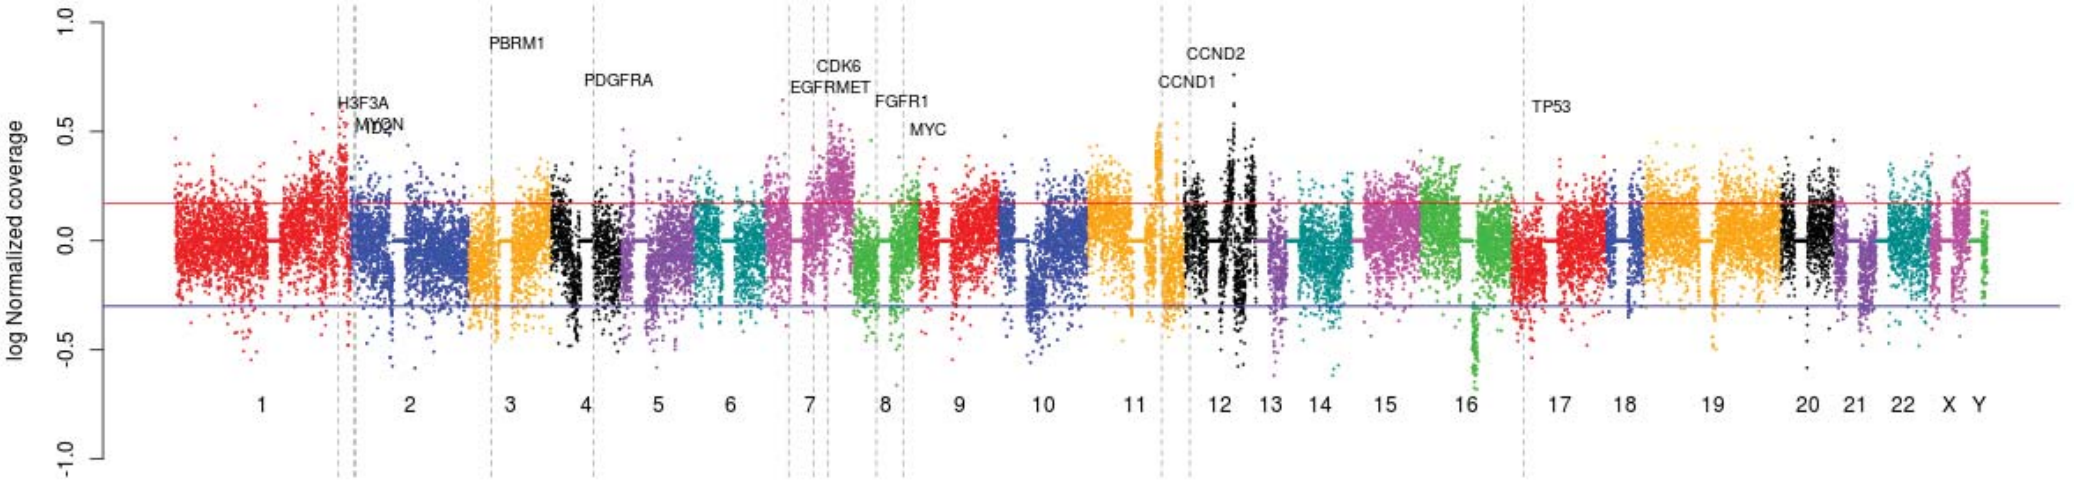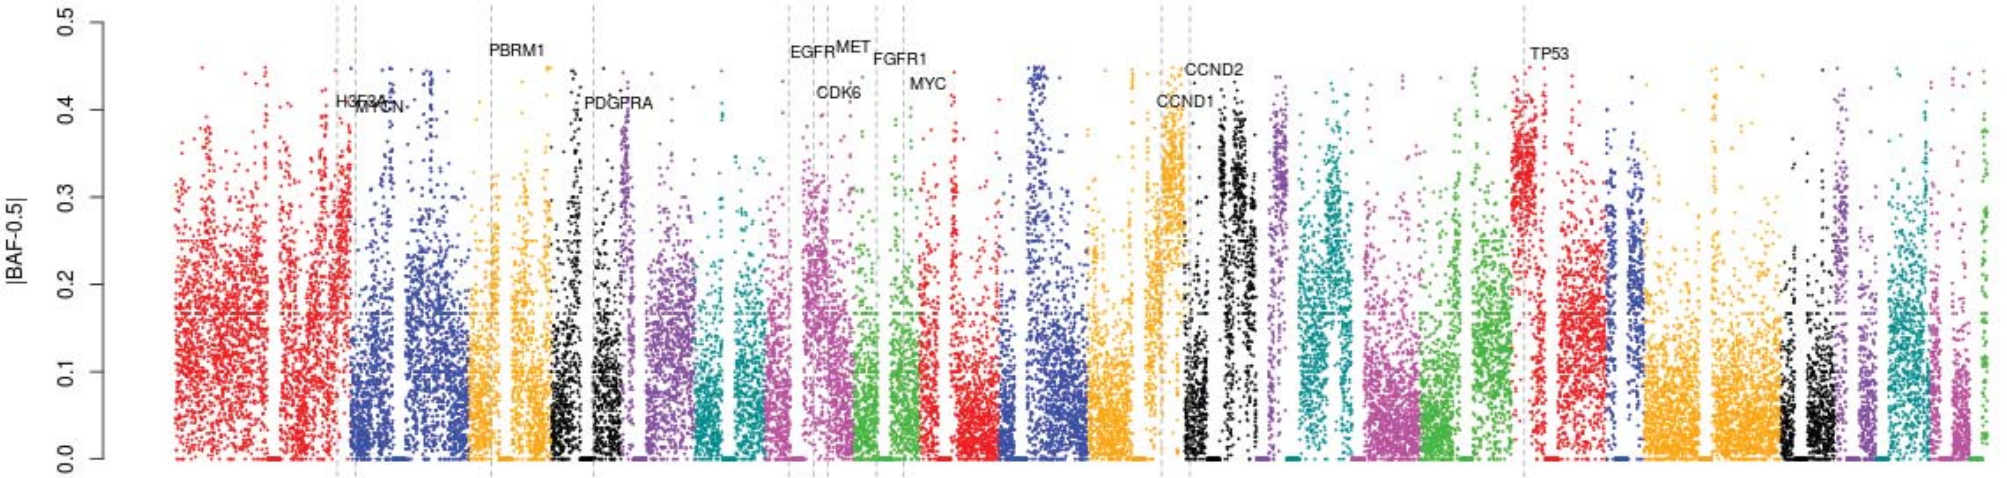

### DIPG7-Pons 2

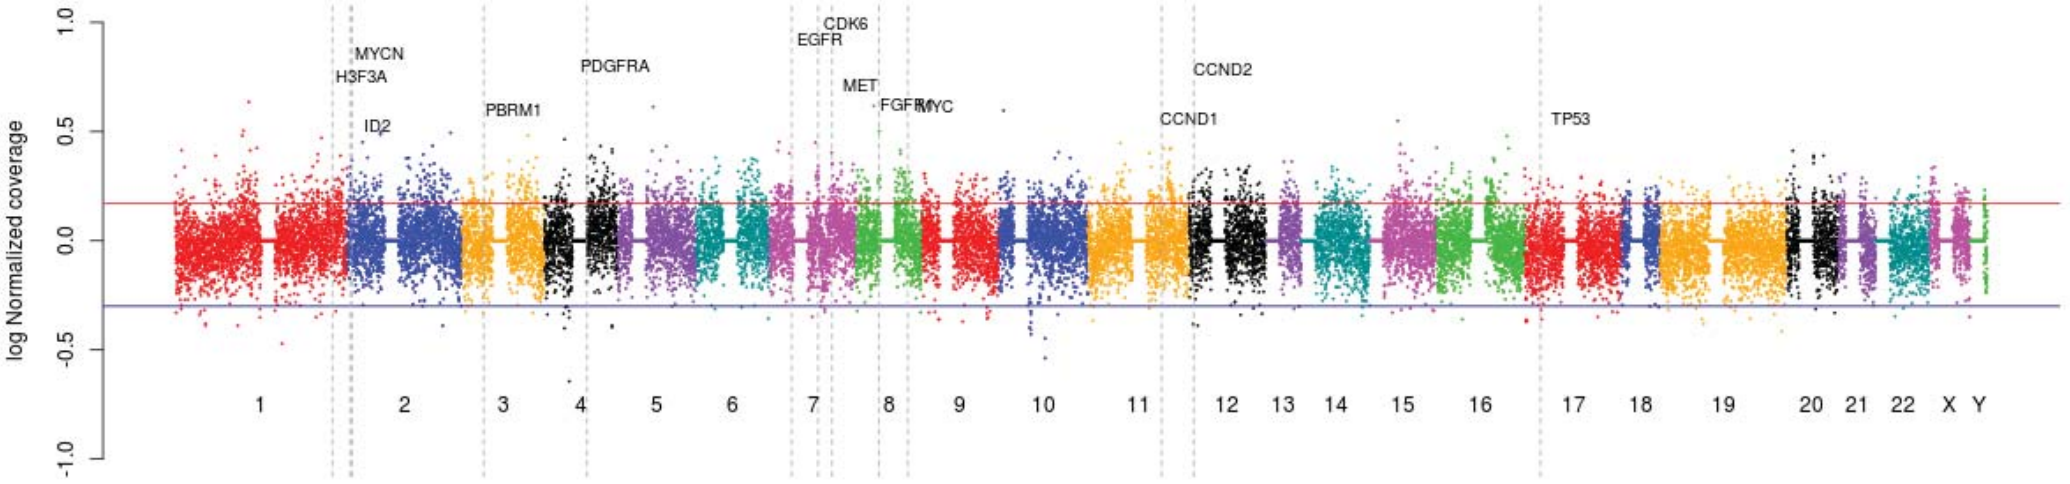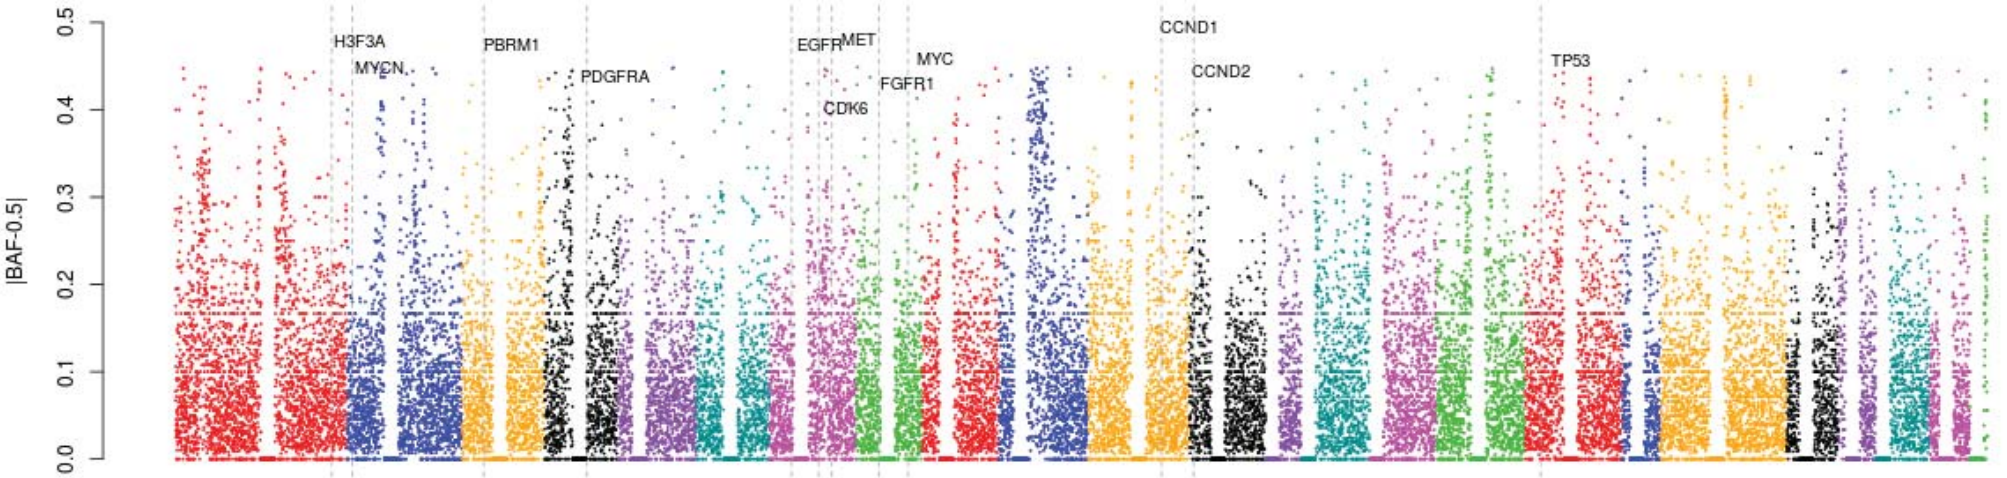



### DIPG7-Pons 3

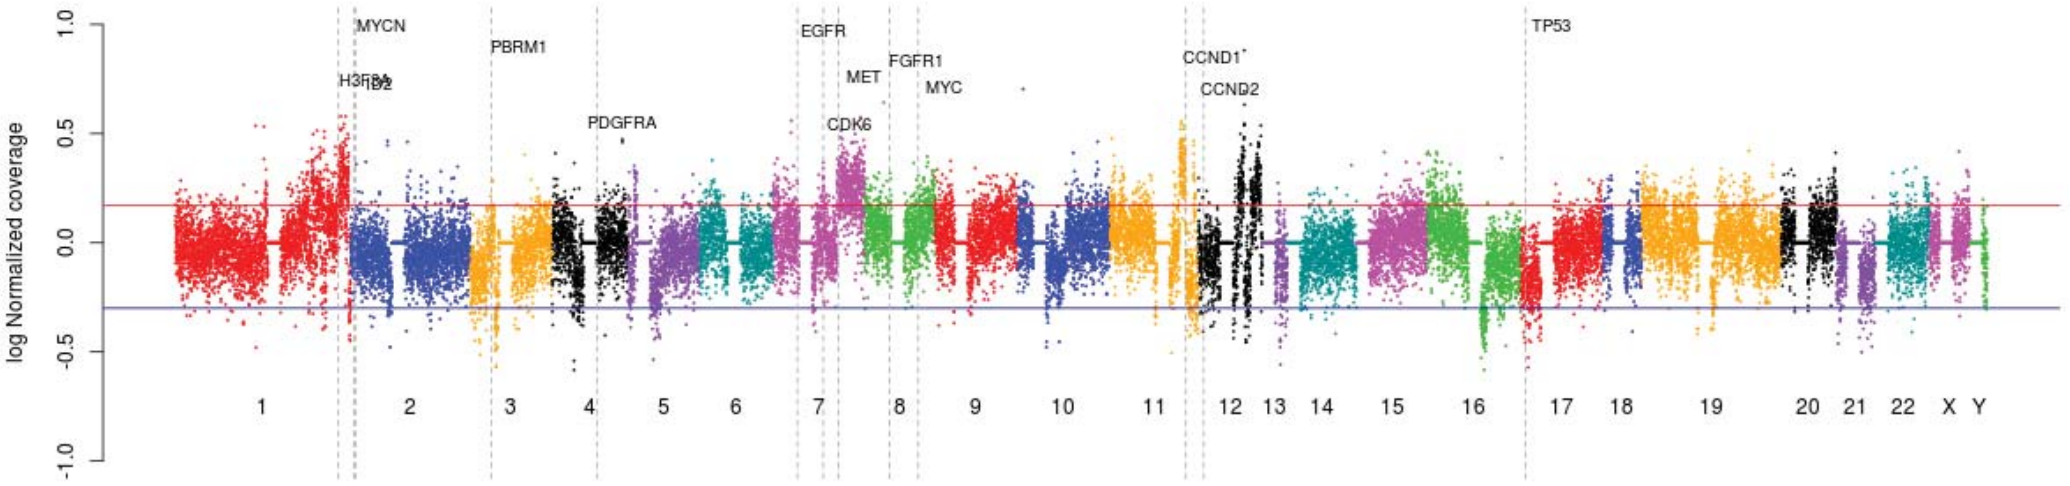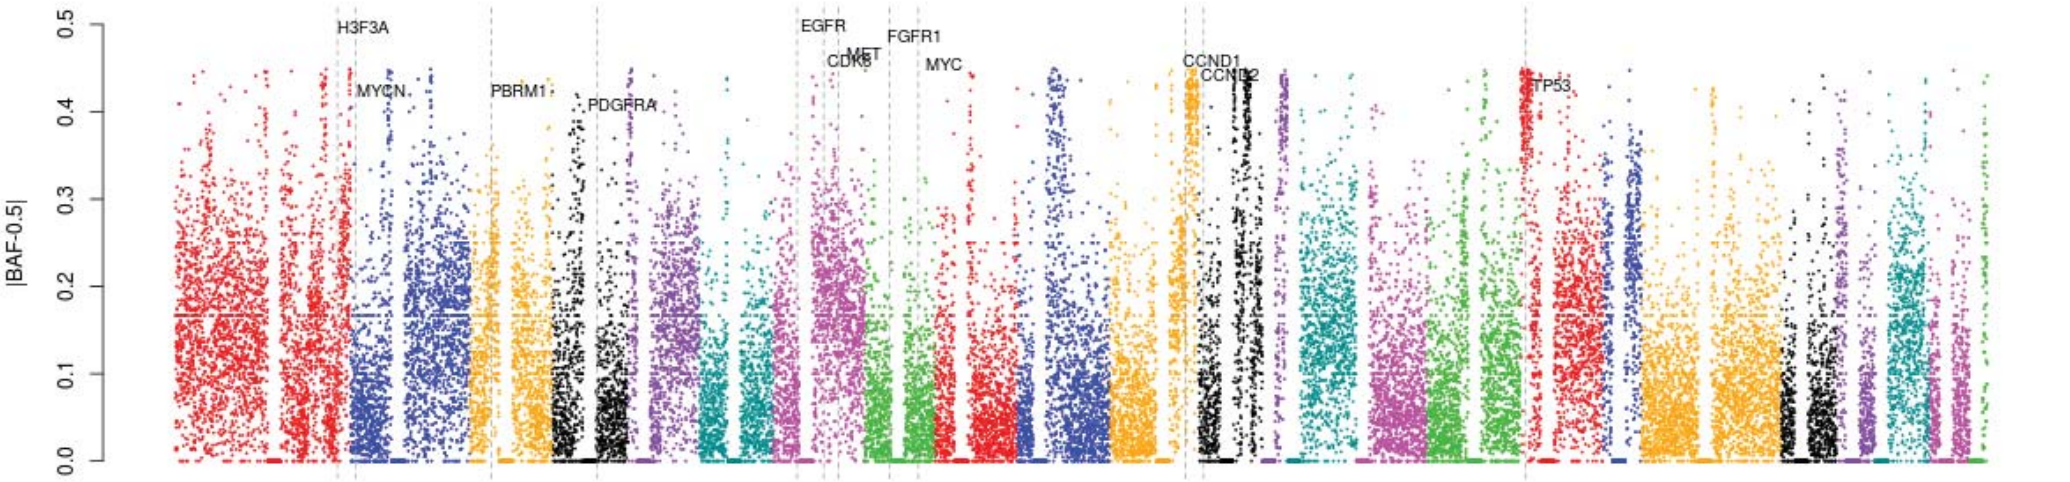

### DIPG7-Pons 5

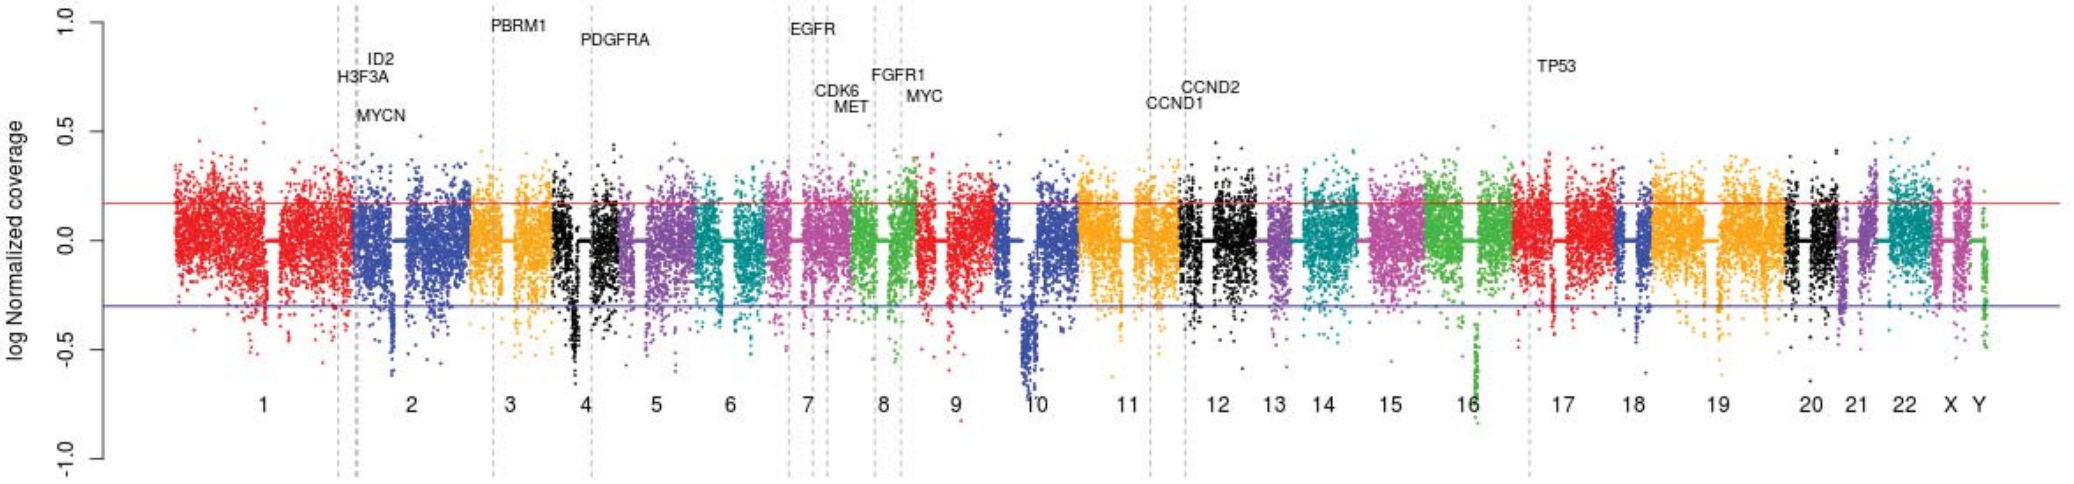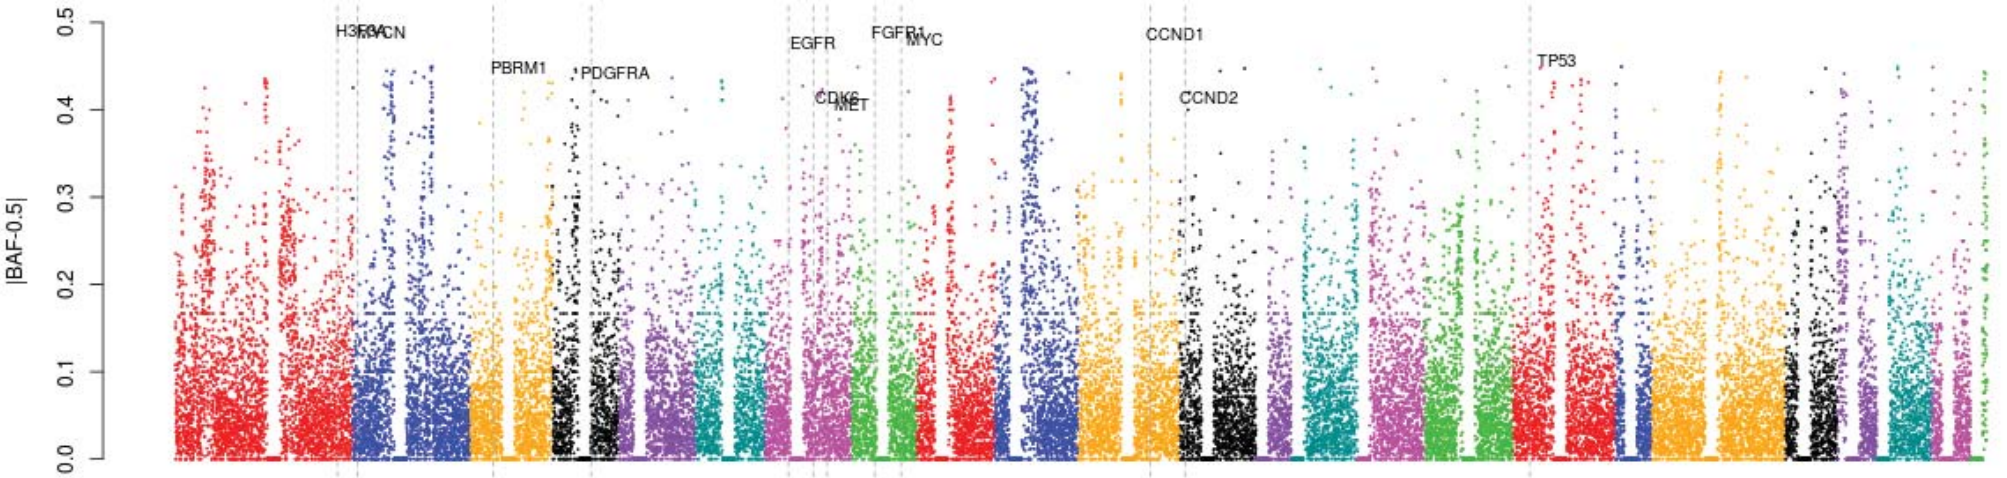



### DIPG8-Cerebellum 1

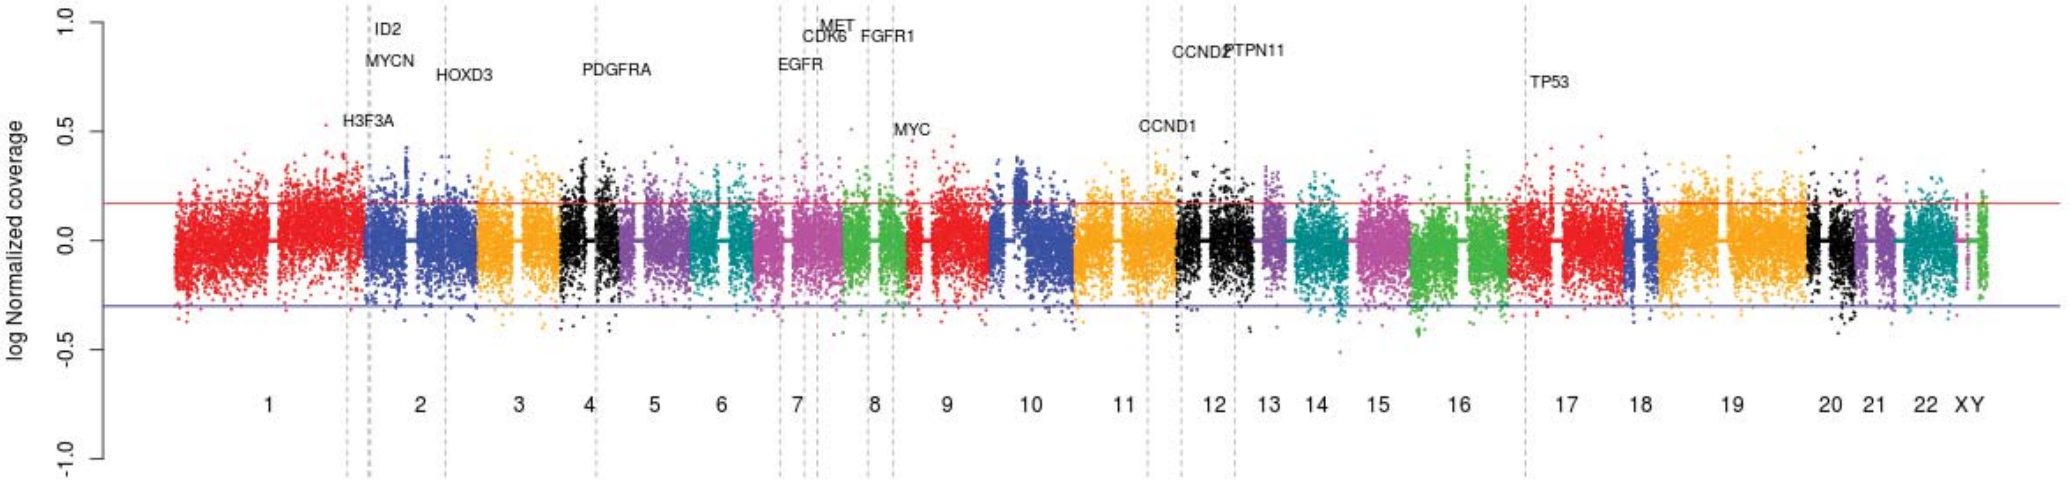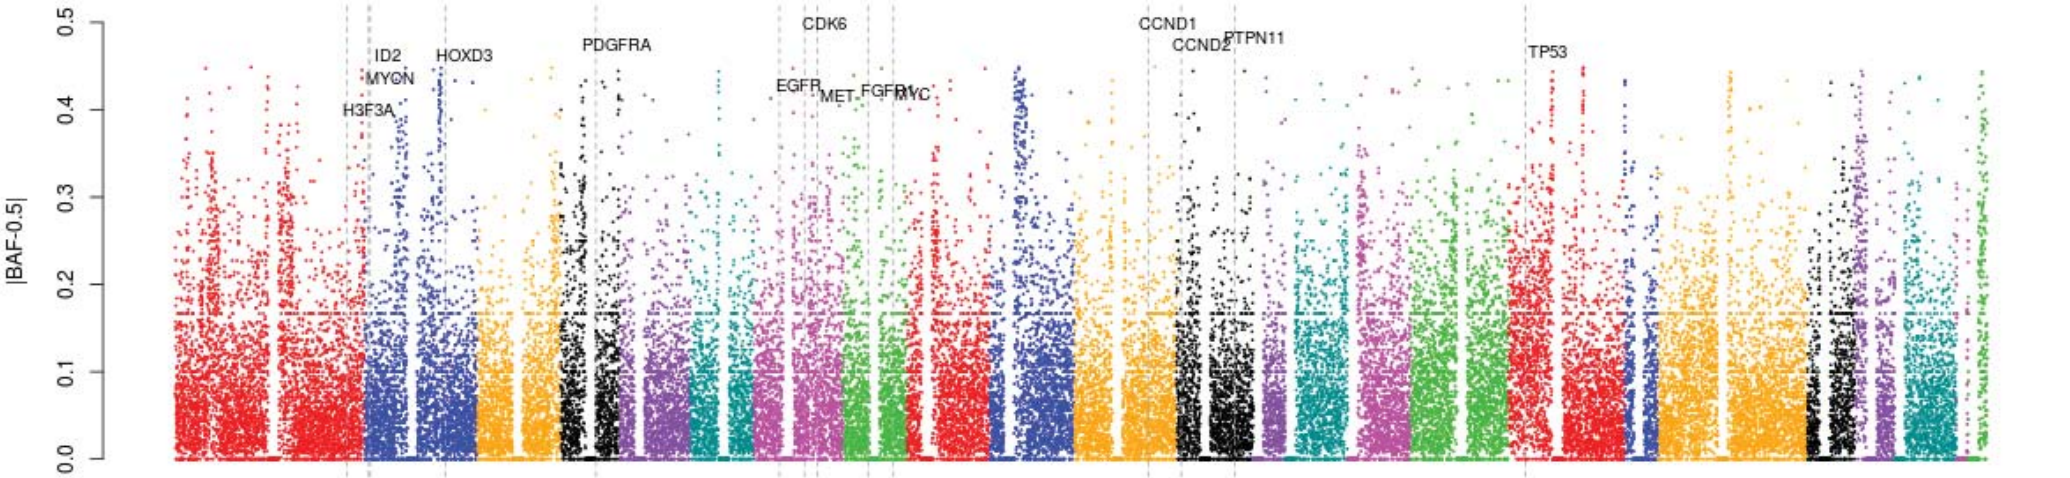



### DIPG8- Frontal Lobe 1

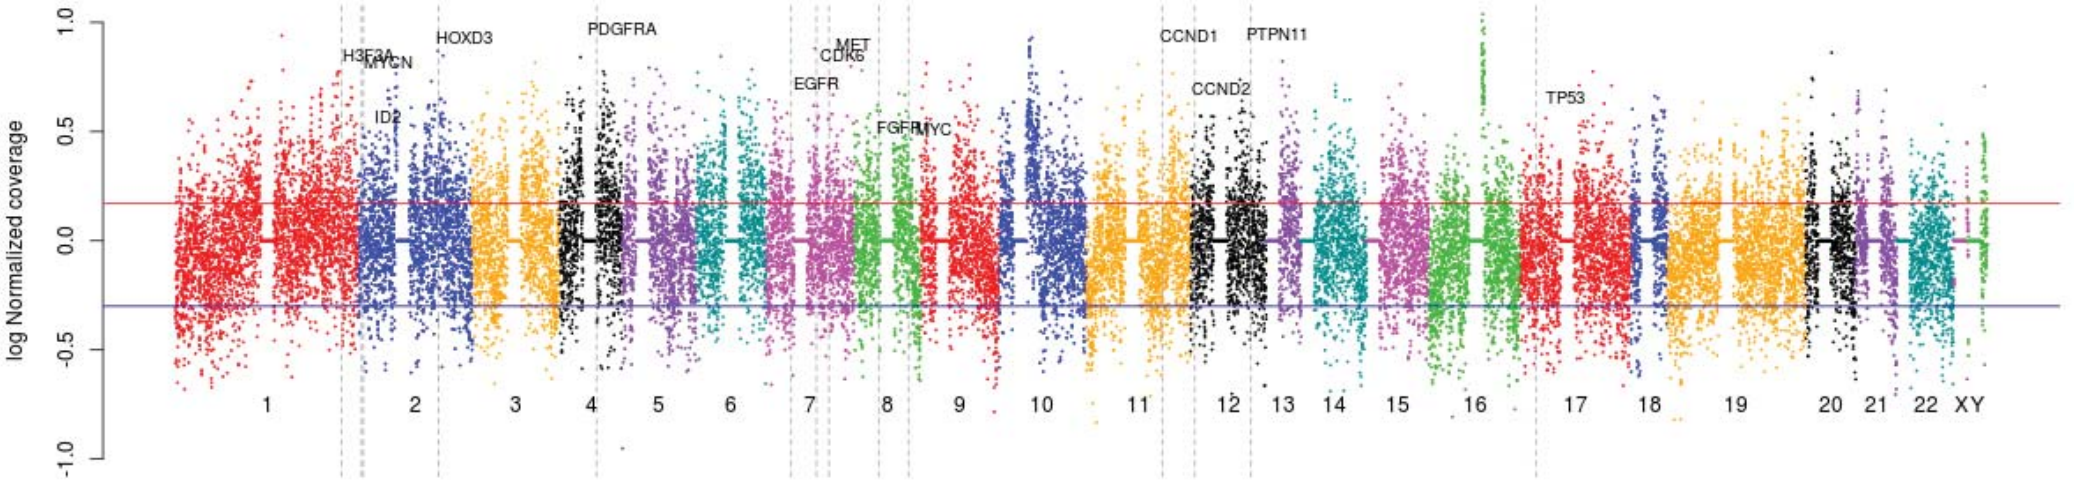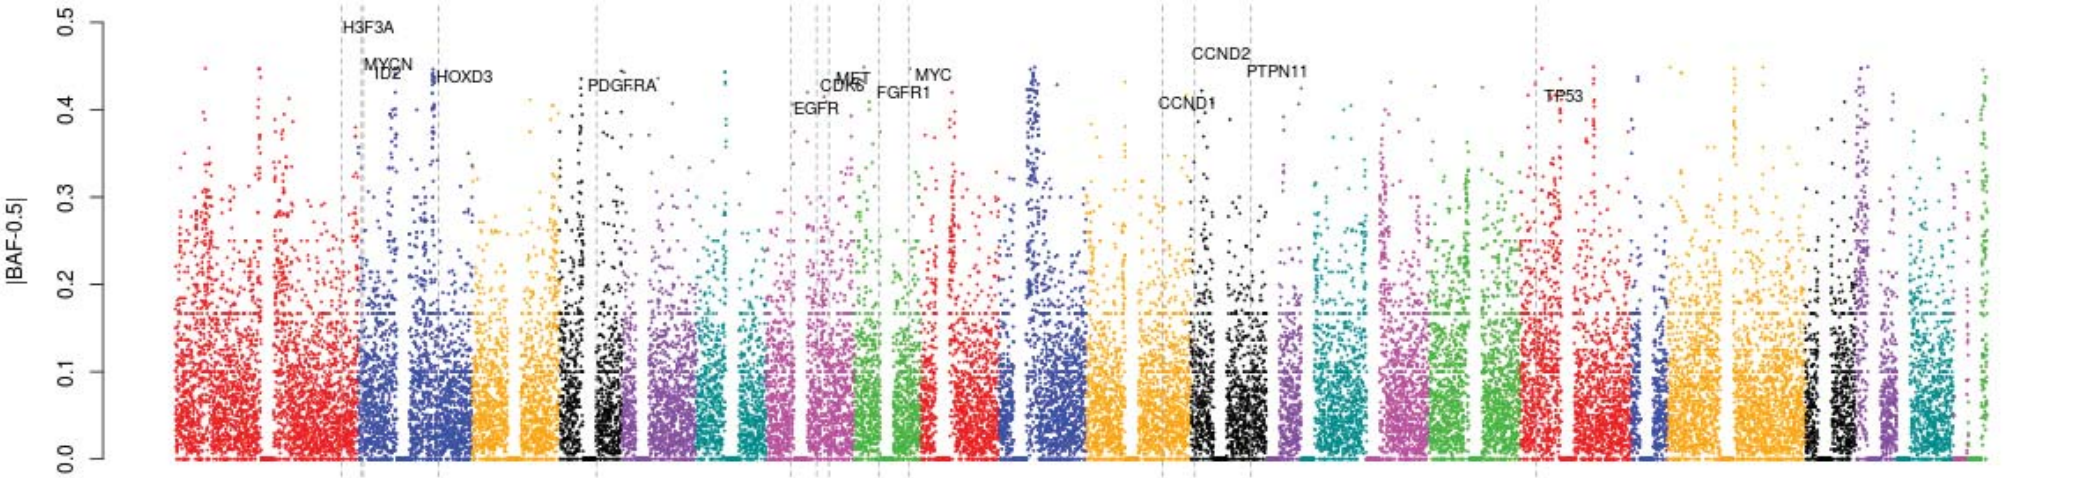



### DIPG8-Medulla 1

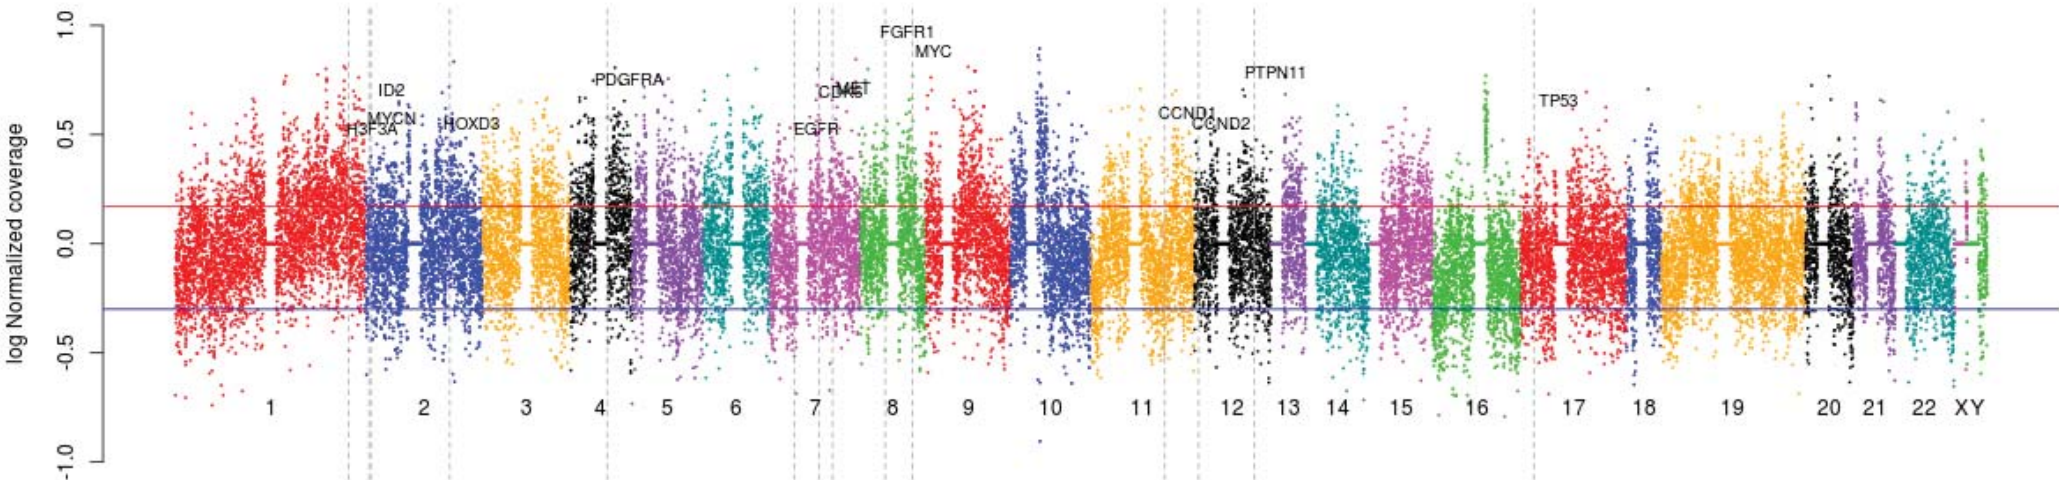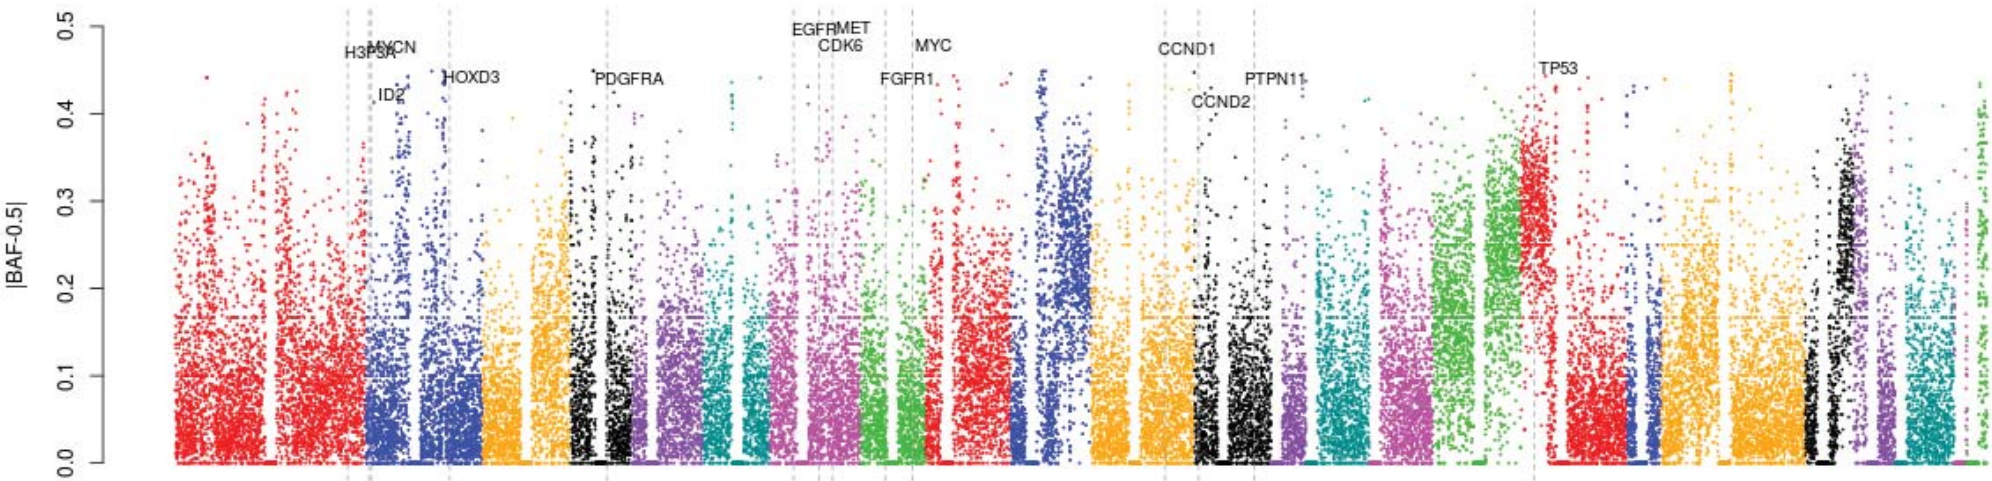



### DIPG8-Medulla 2

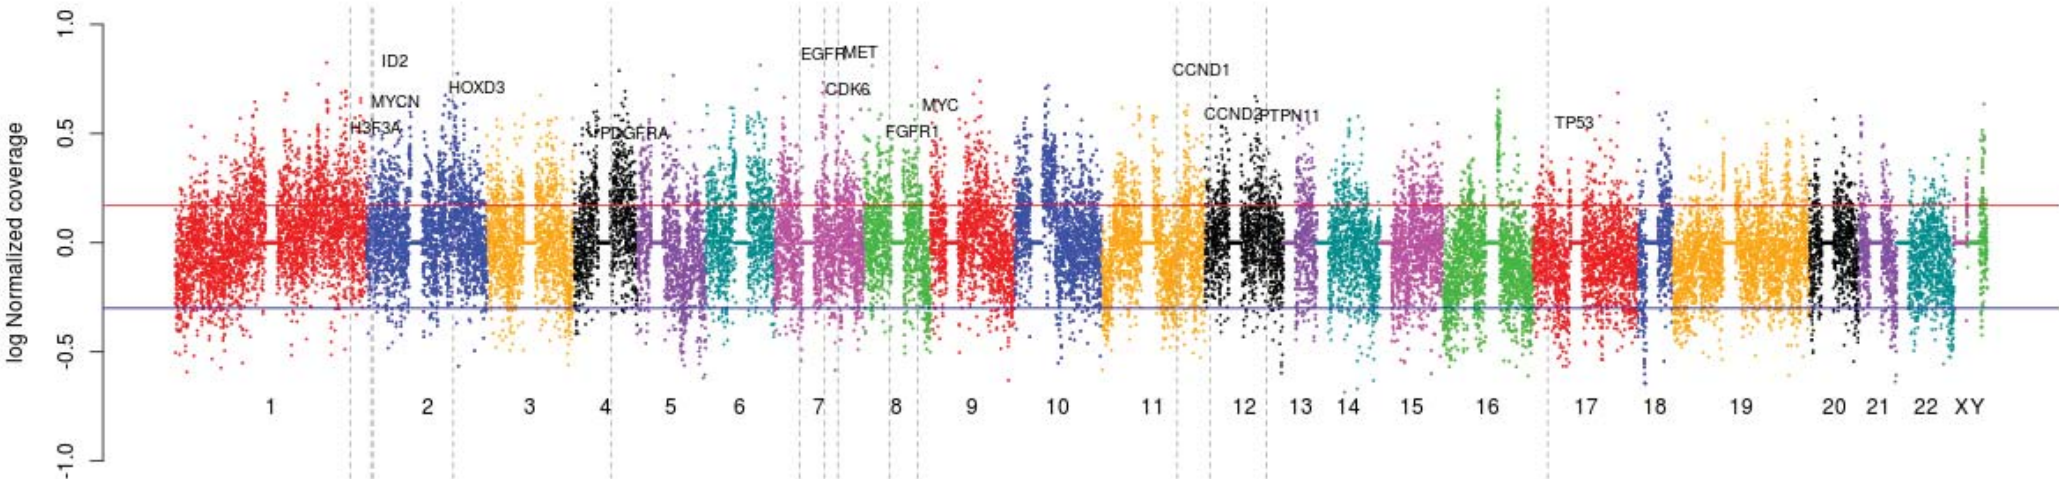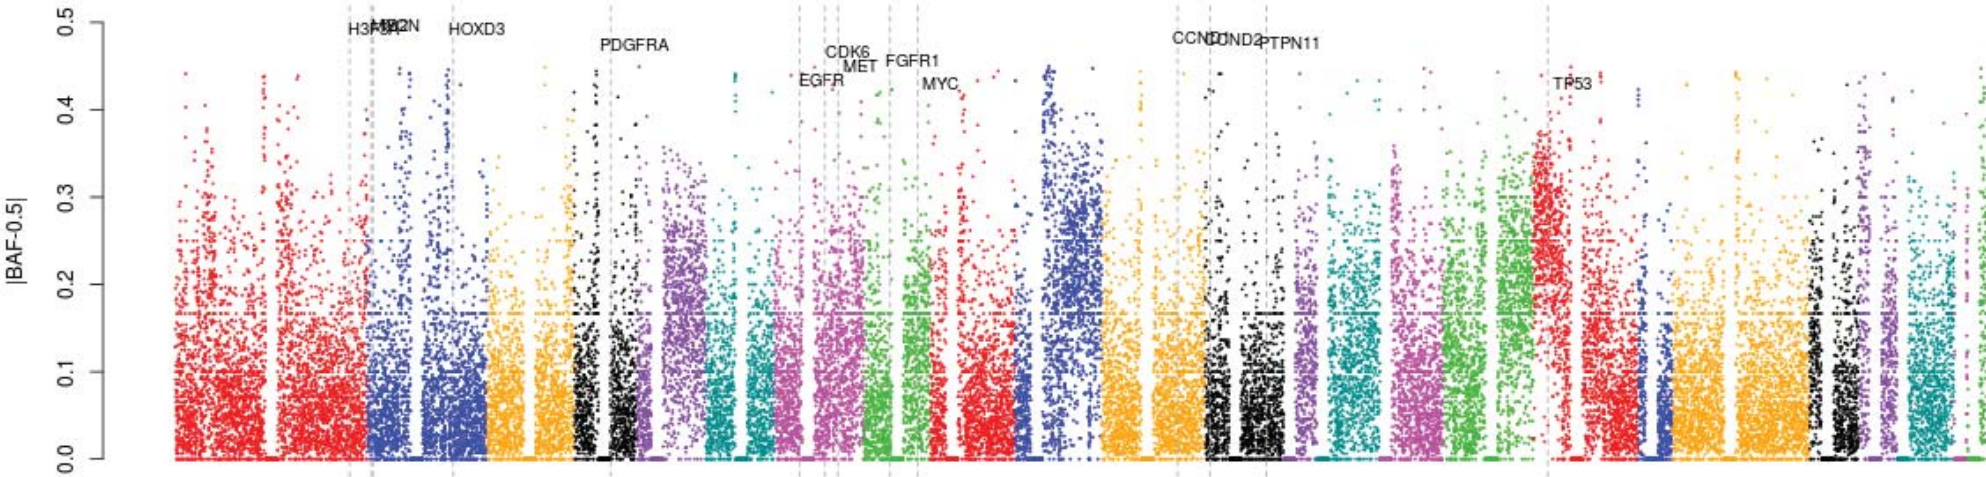



### DIPG8-Medulla 3

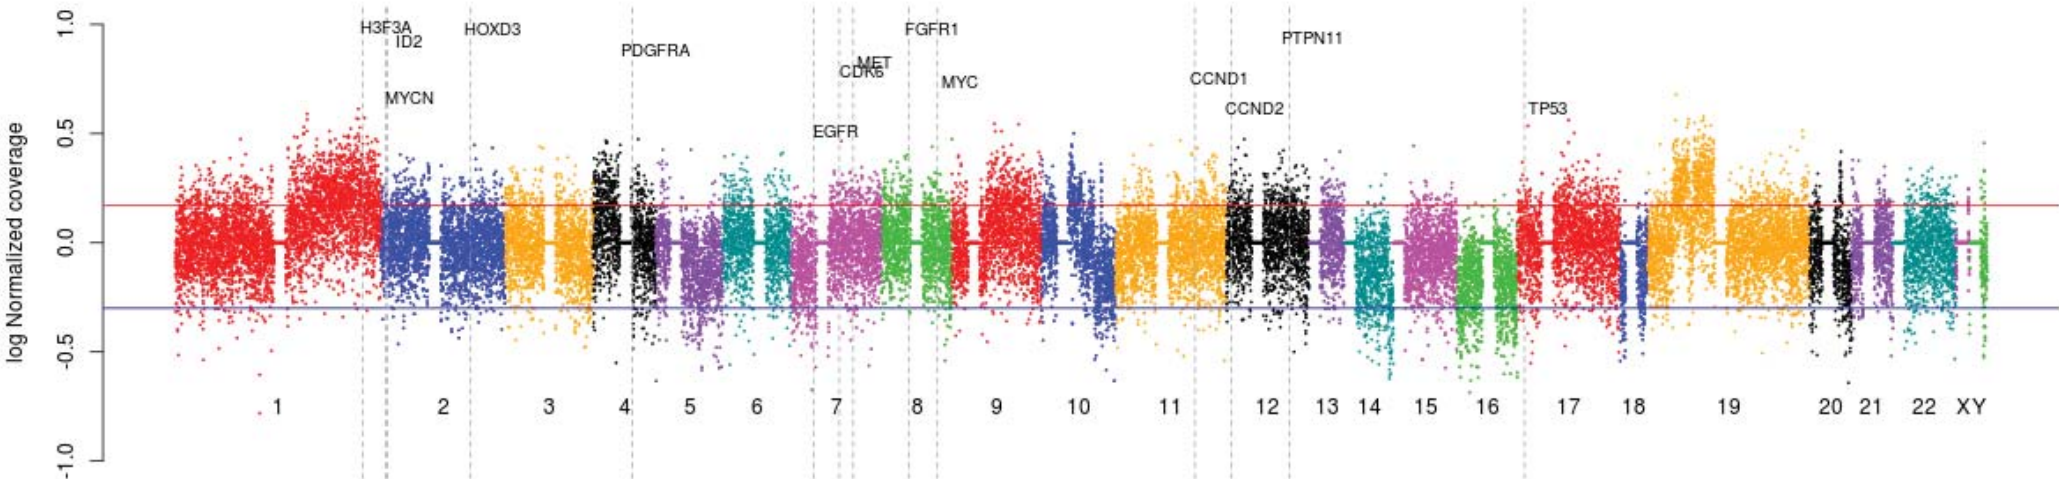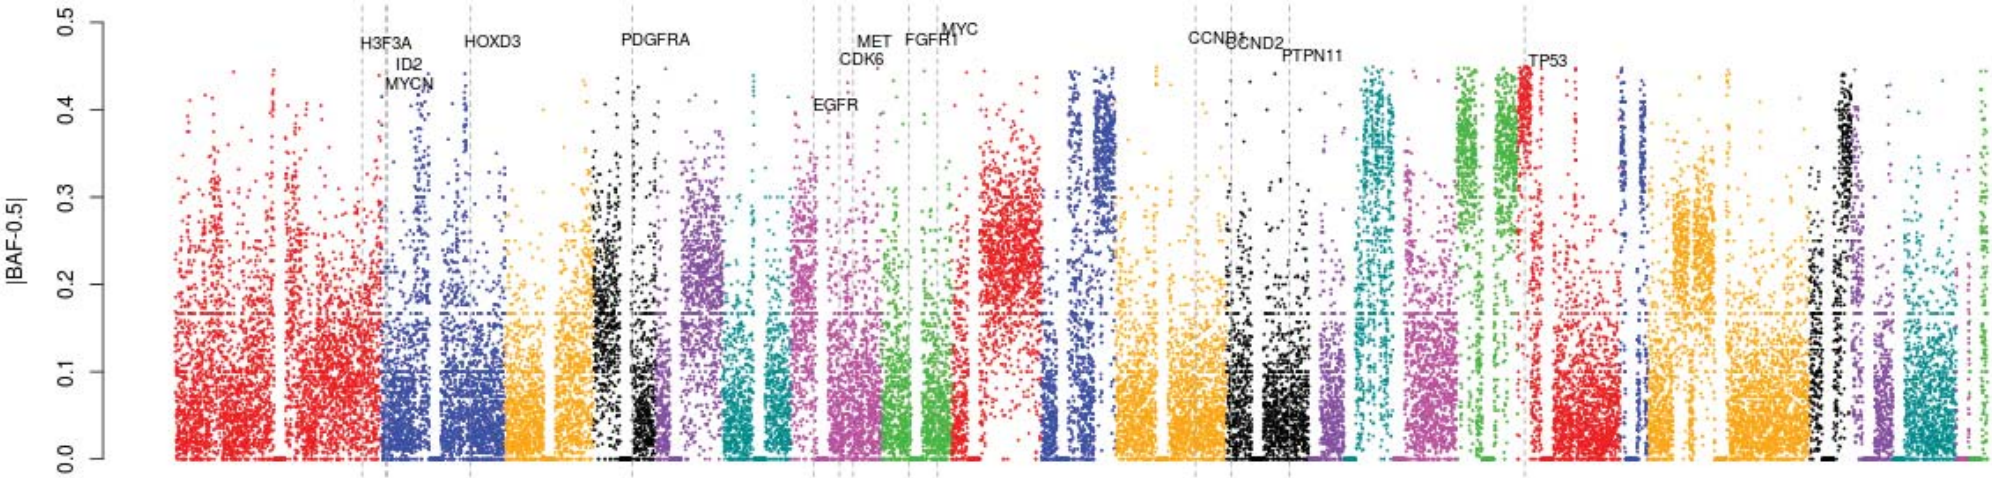



### DIPG8-Midbrain

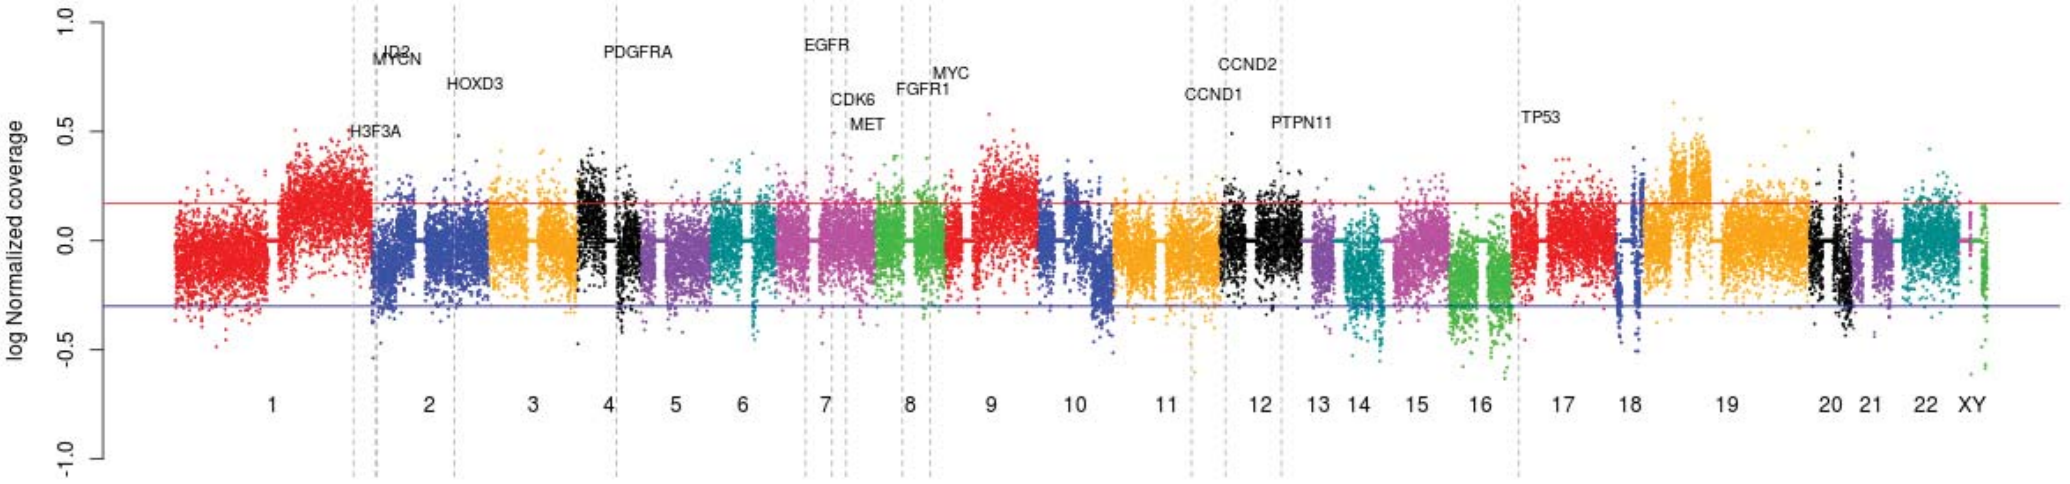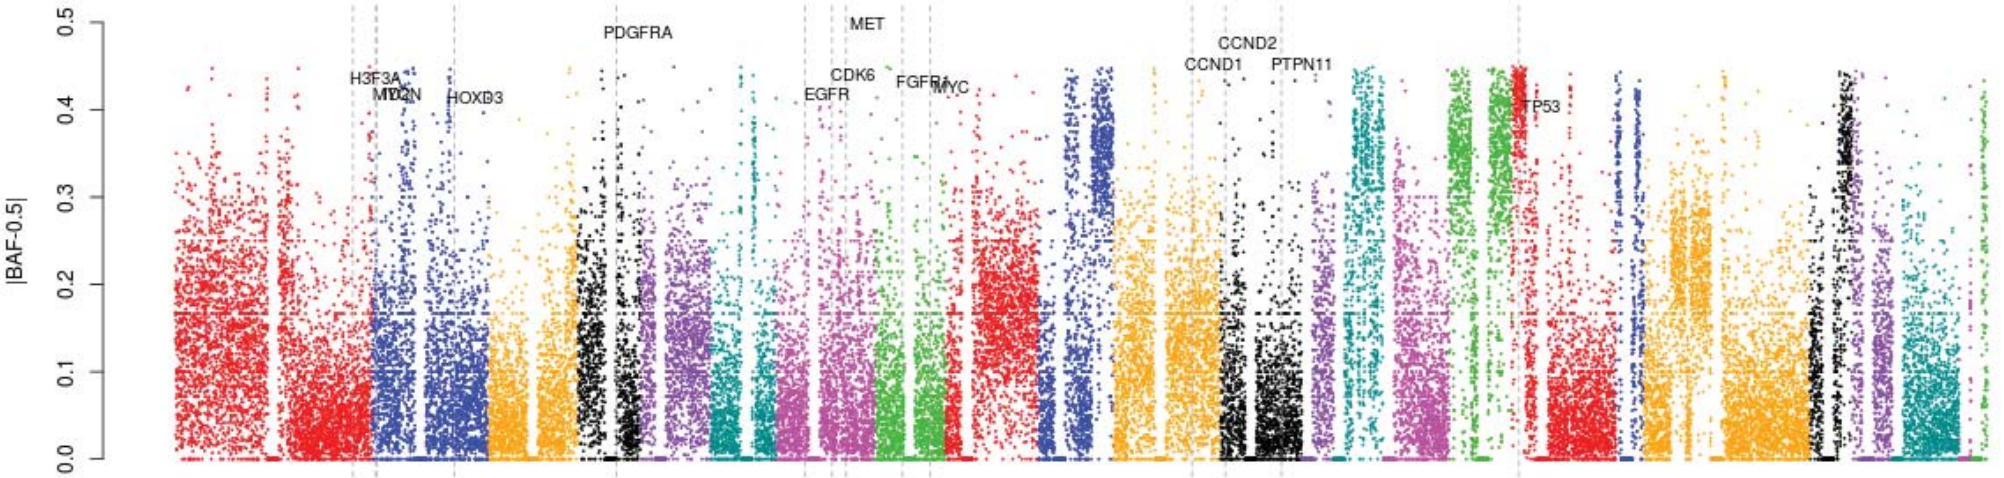



### DIPG8-Occipital Lobe

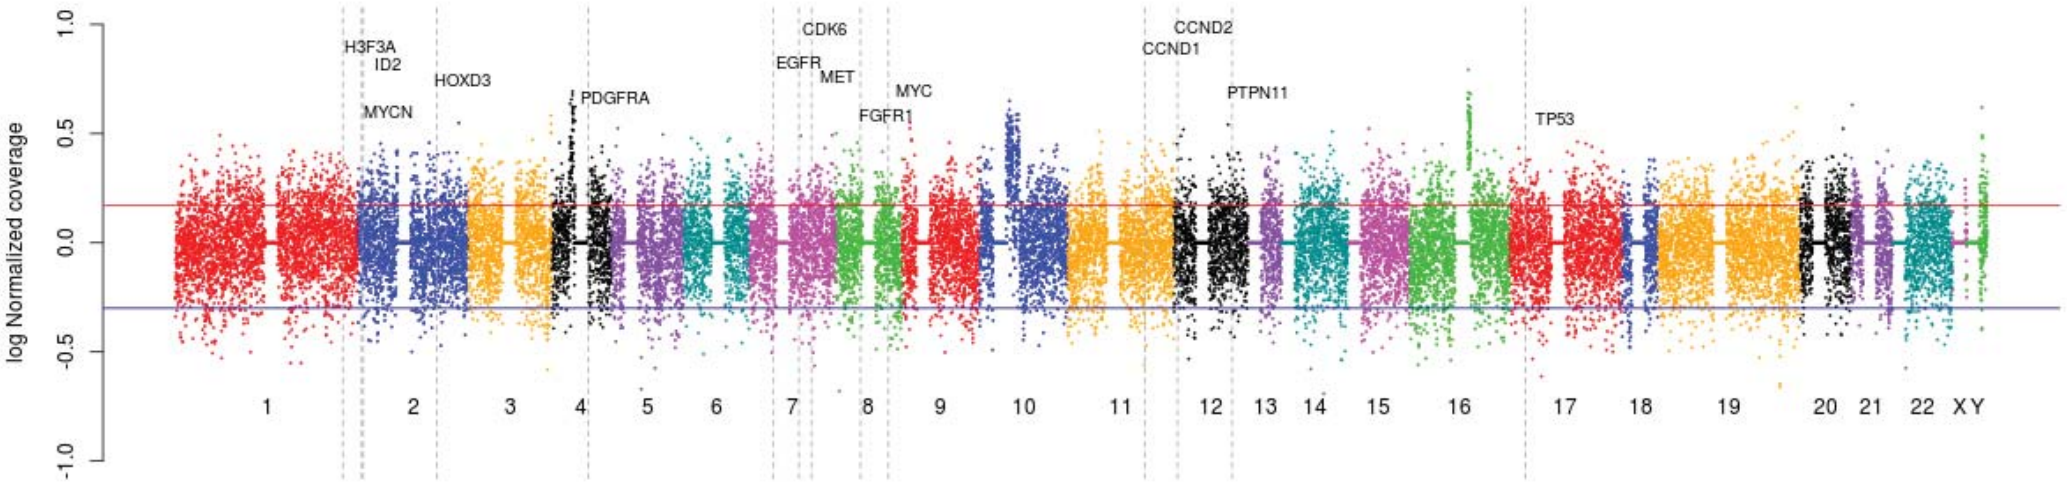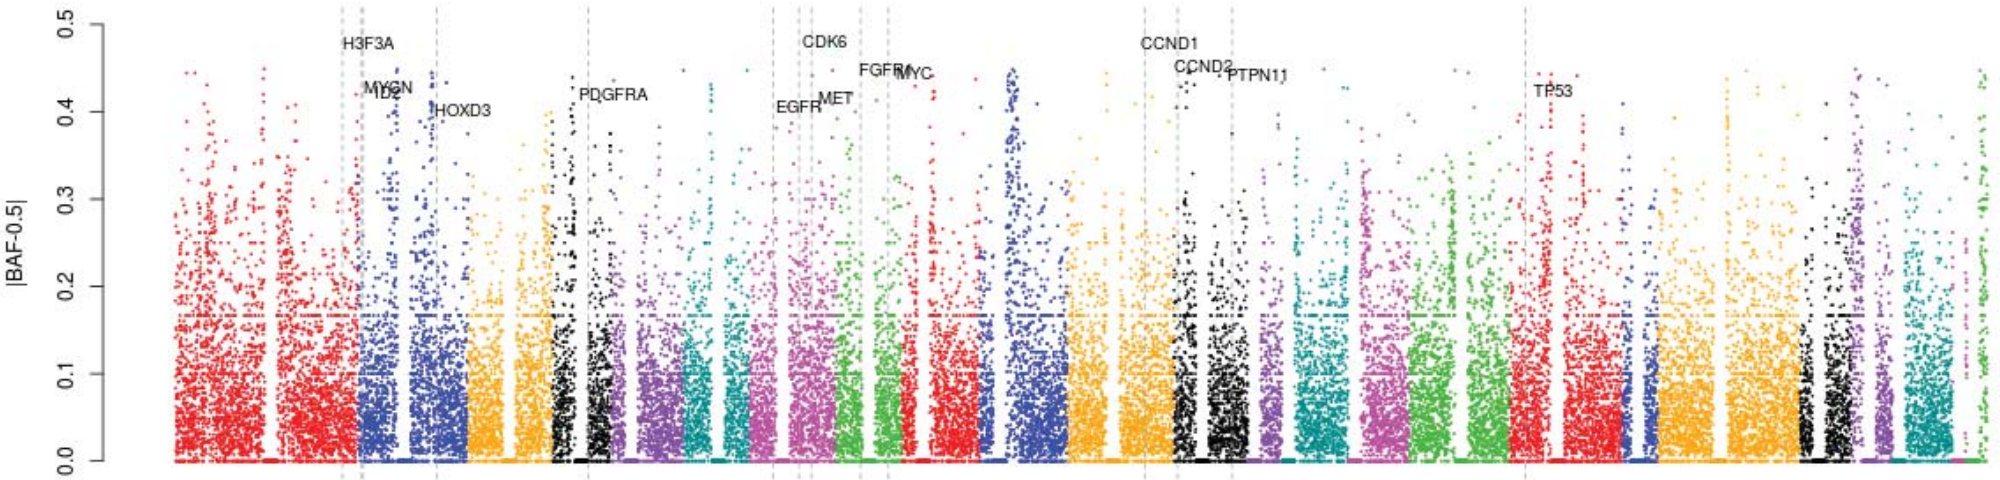



### DIPG8-Parietal Lobe 2

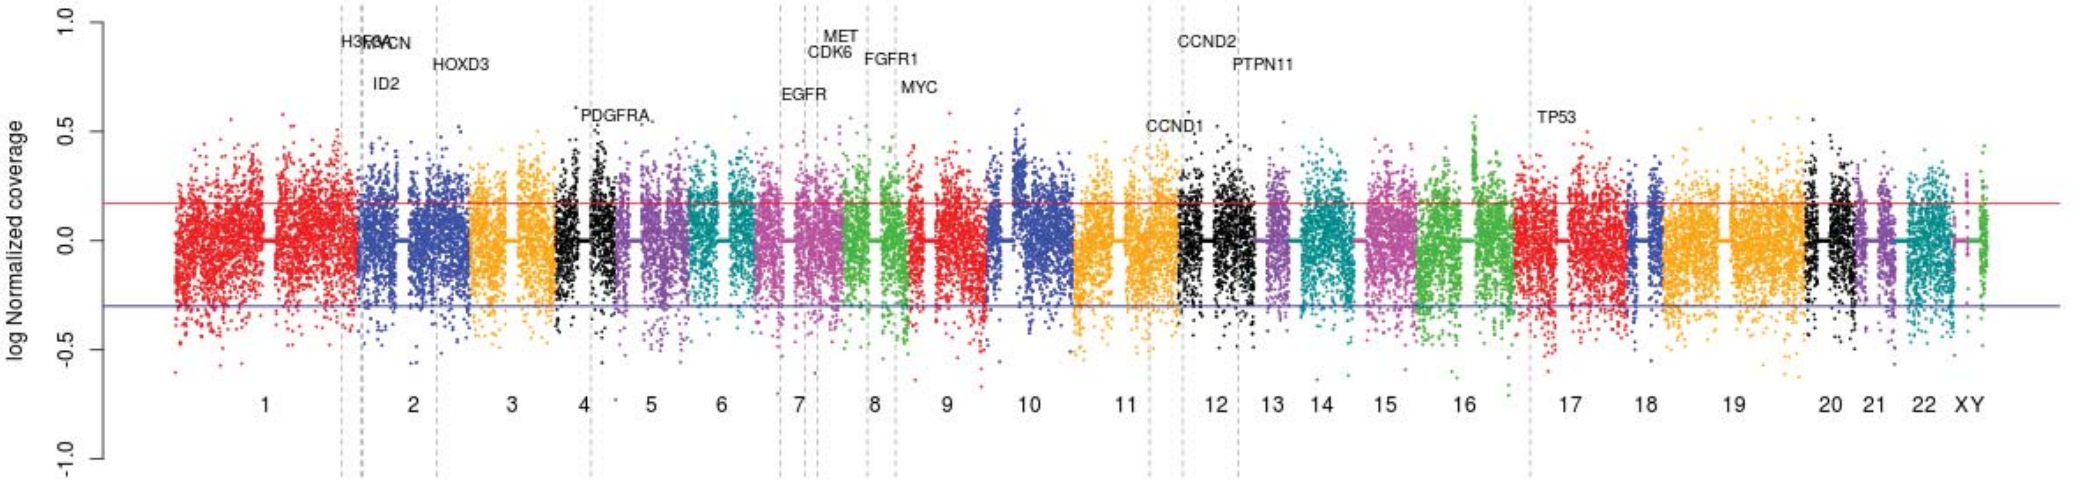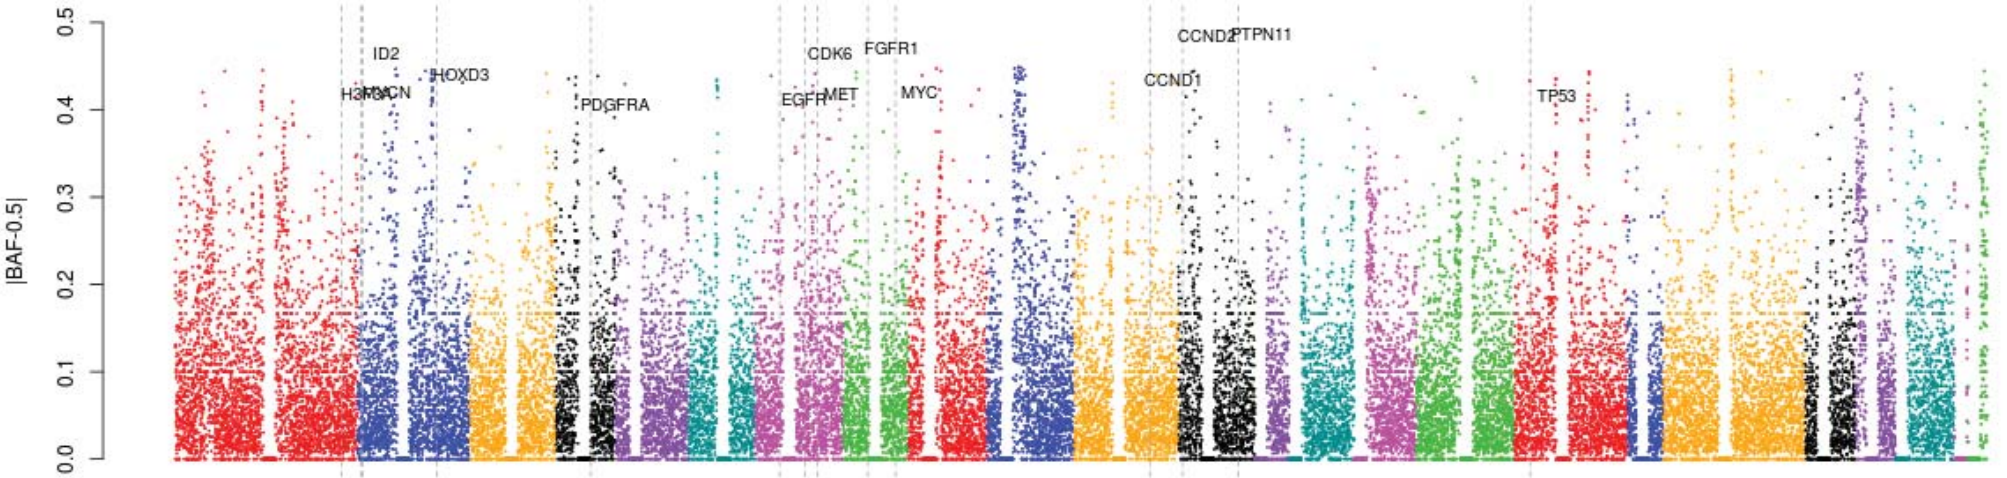



### DIPG8-Pons 1

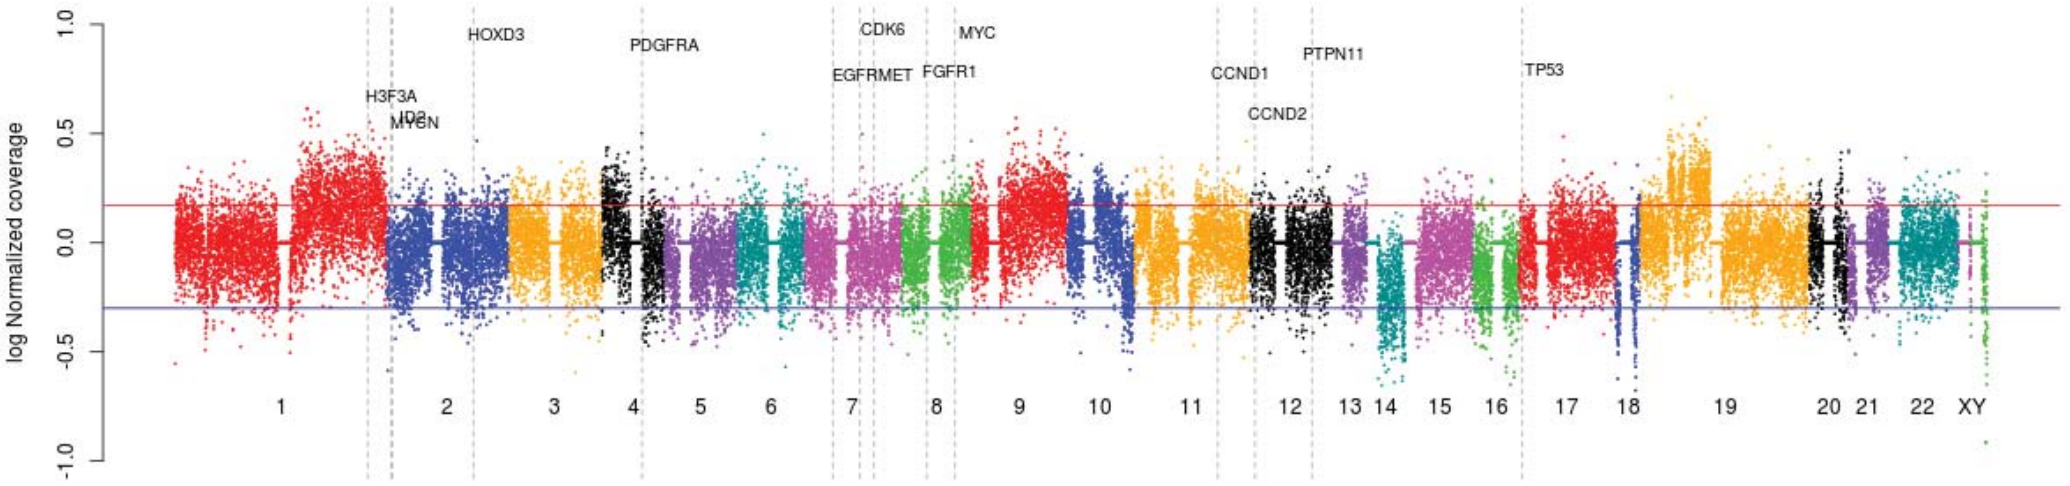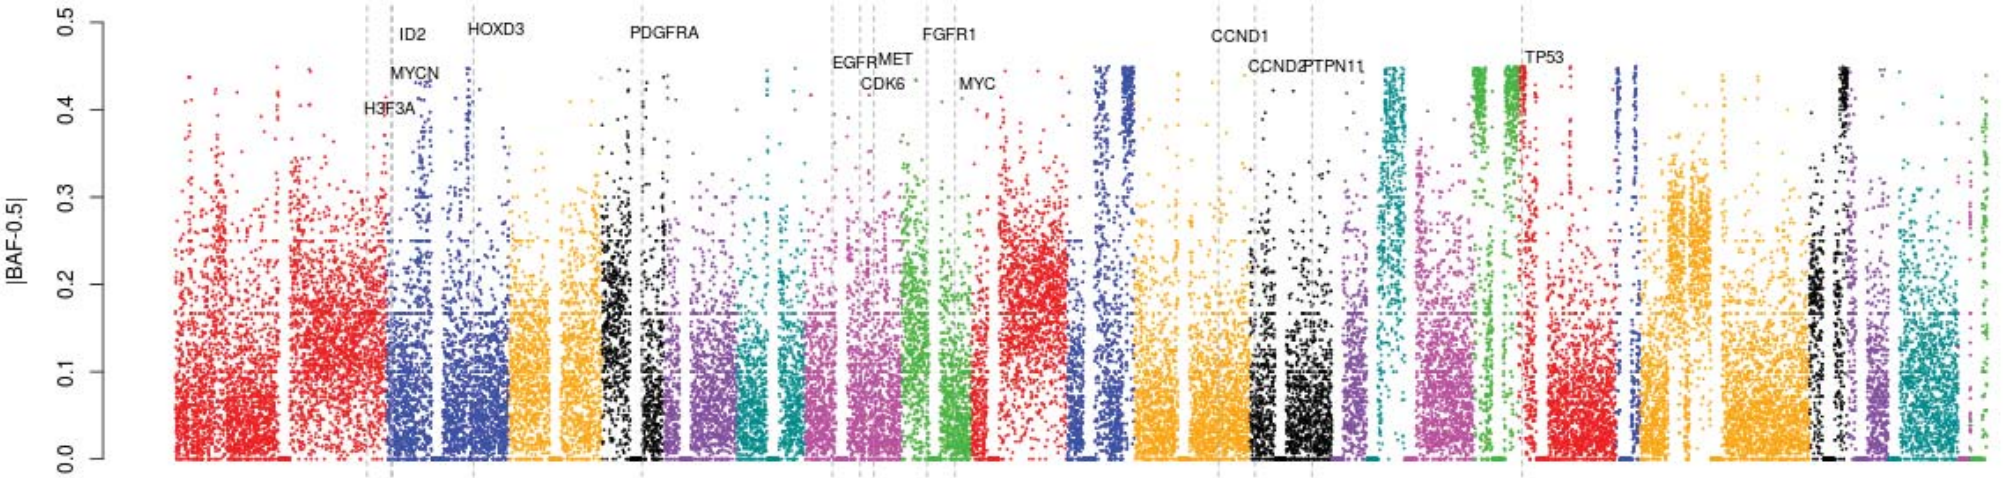



### DIPG8-Pons 2

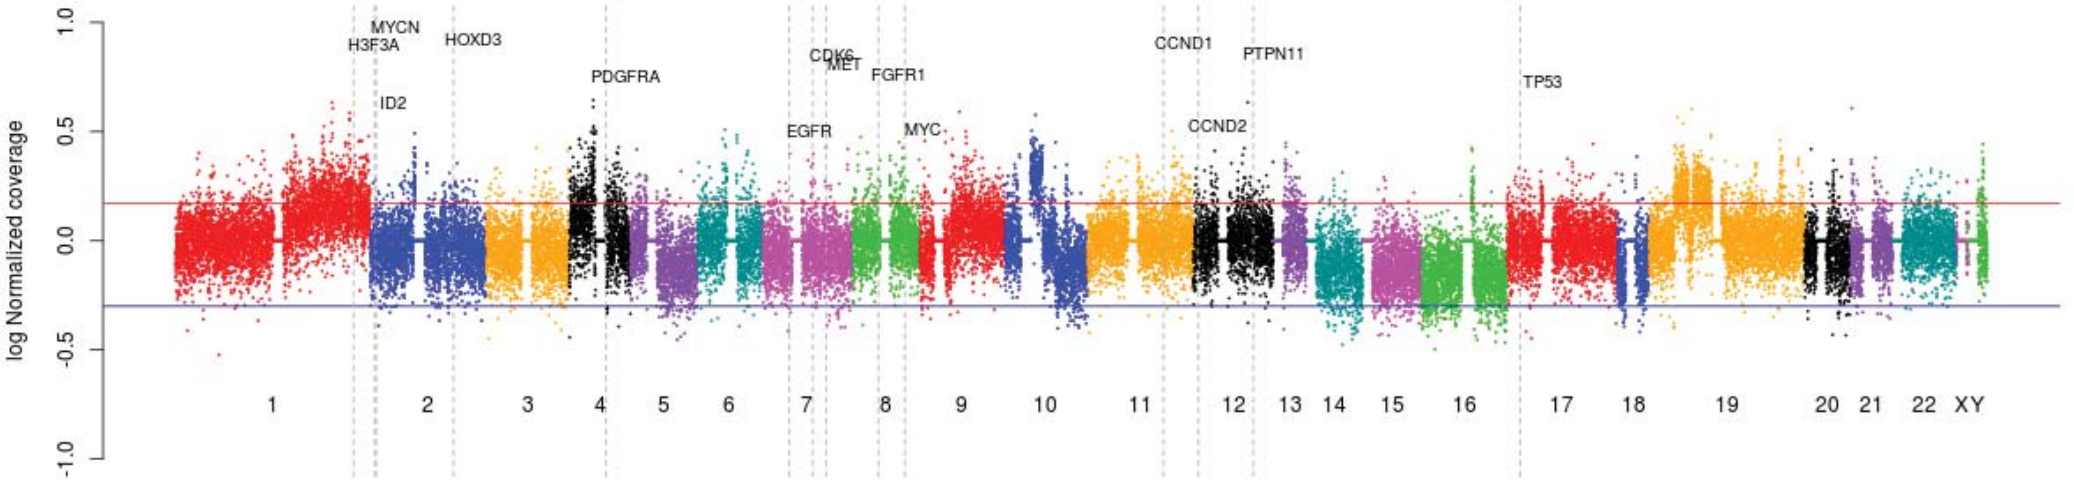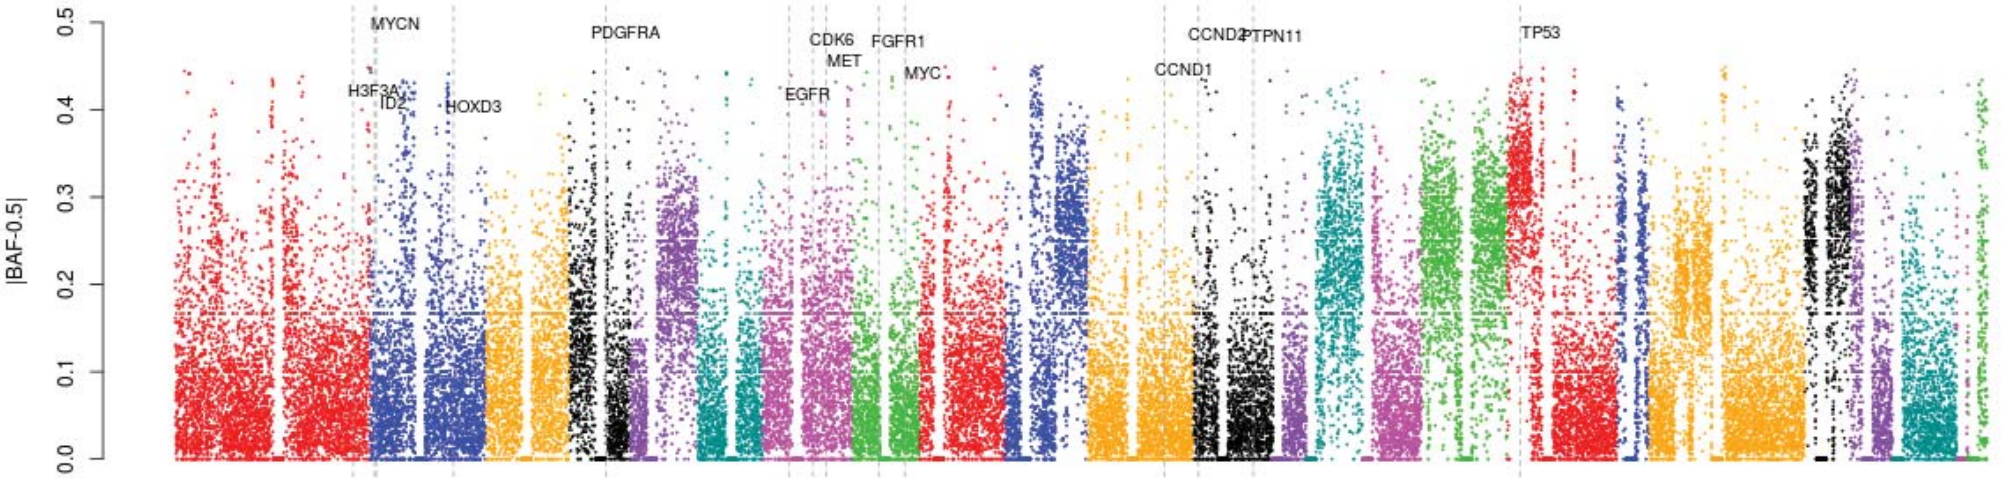



### DIPG8-Ventricle

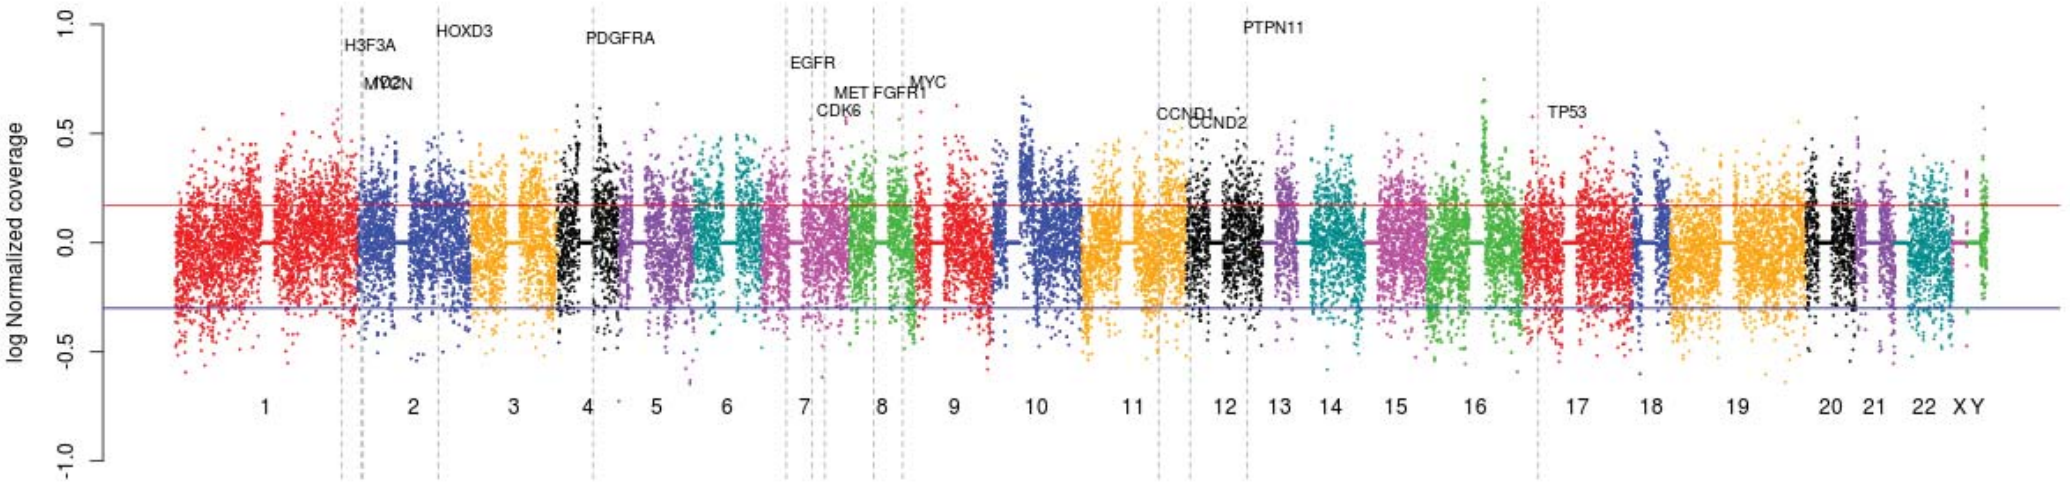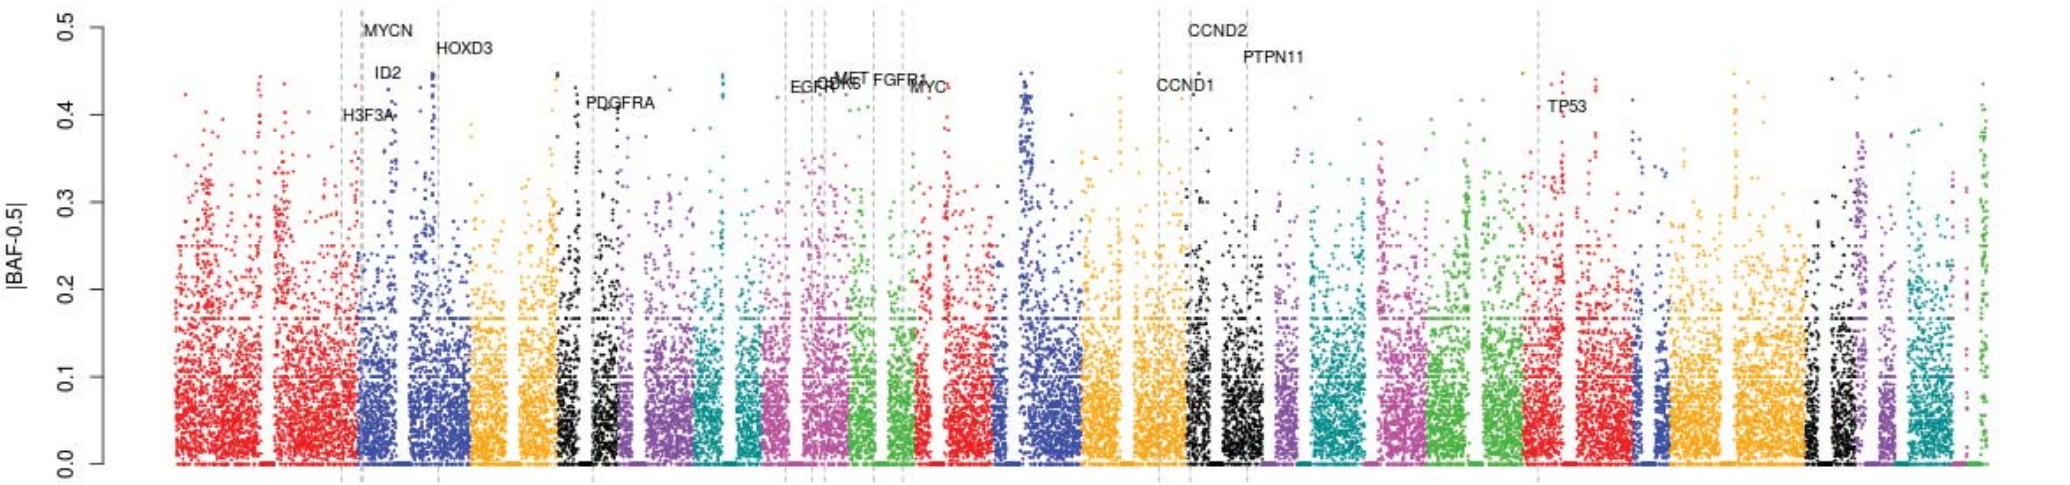



### DIPG9-Cerebellum 3

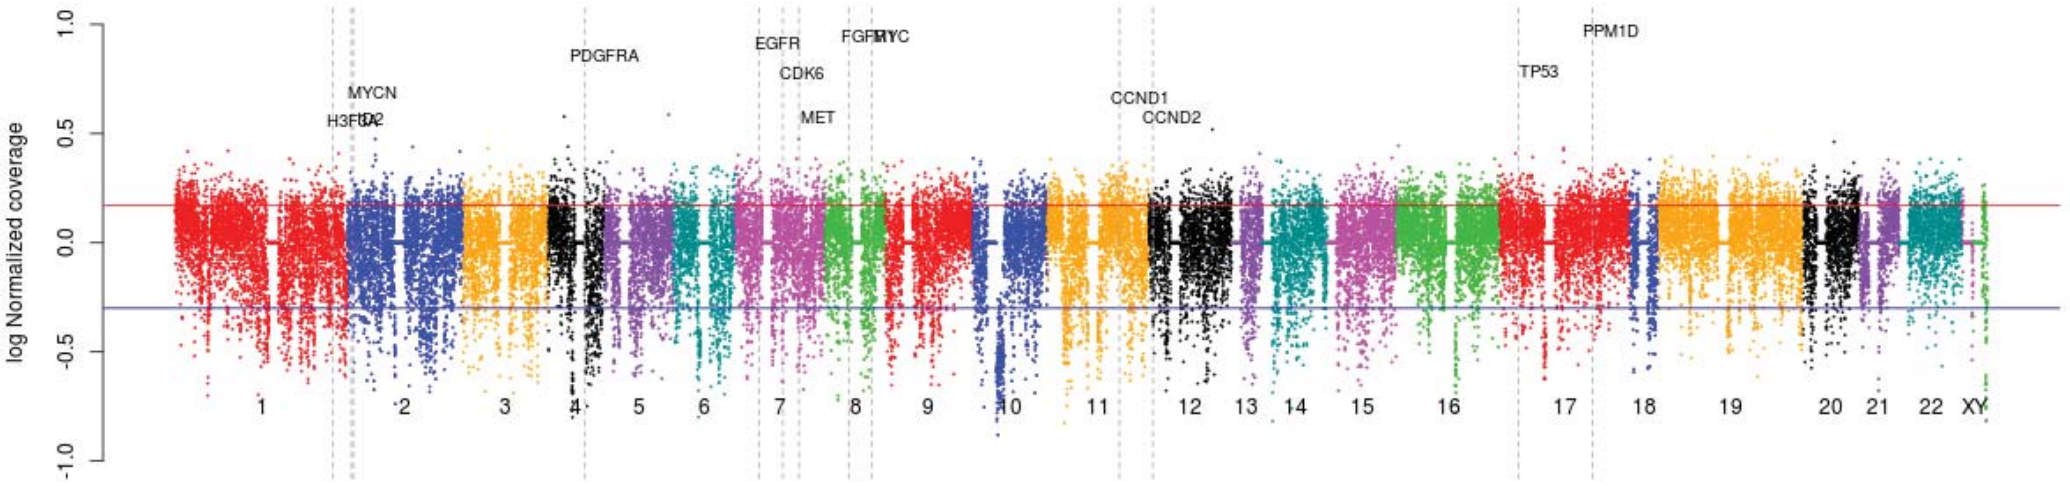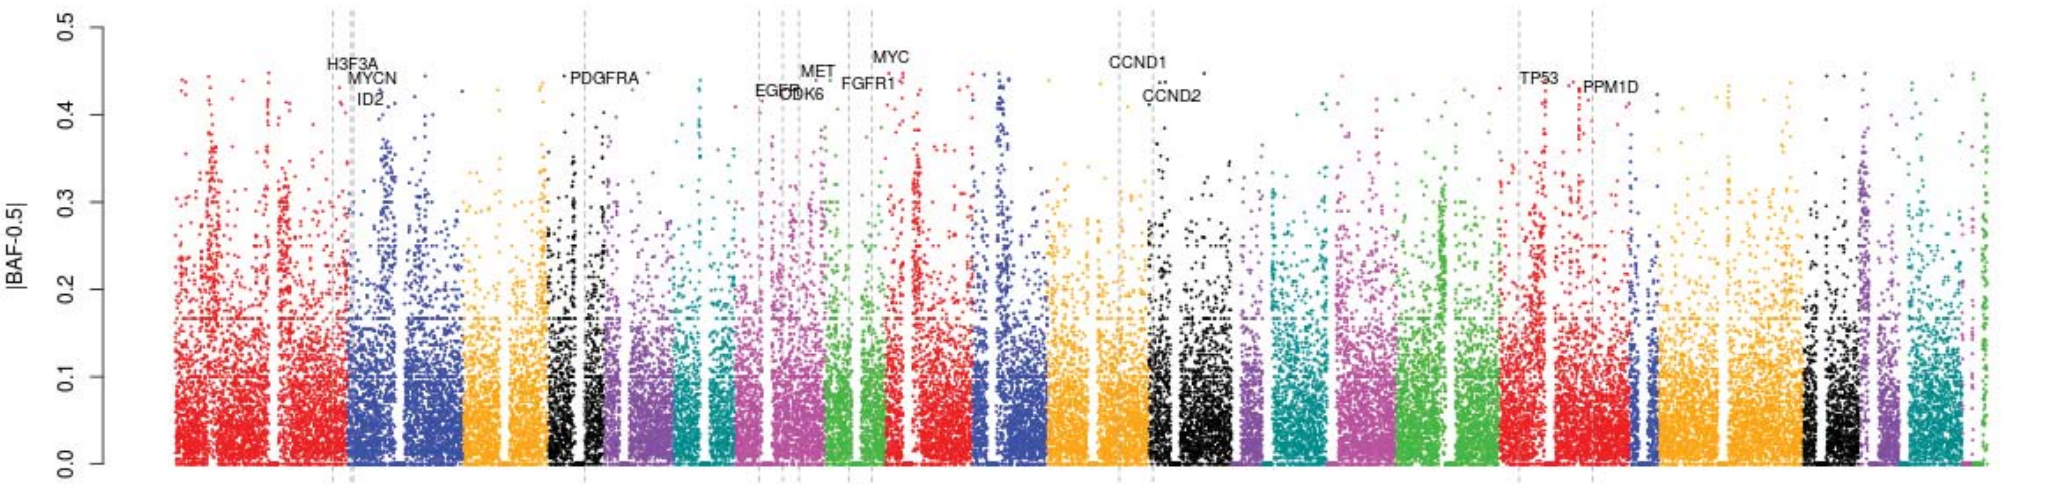



### DIPG9-Frontal Lobe 3

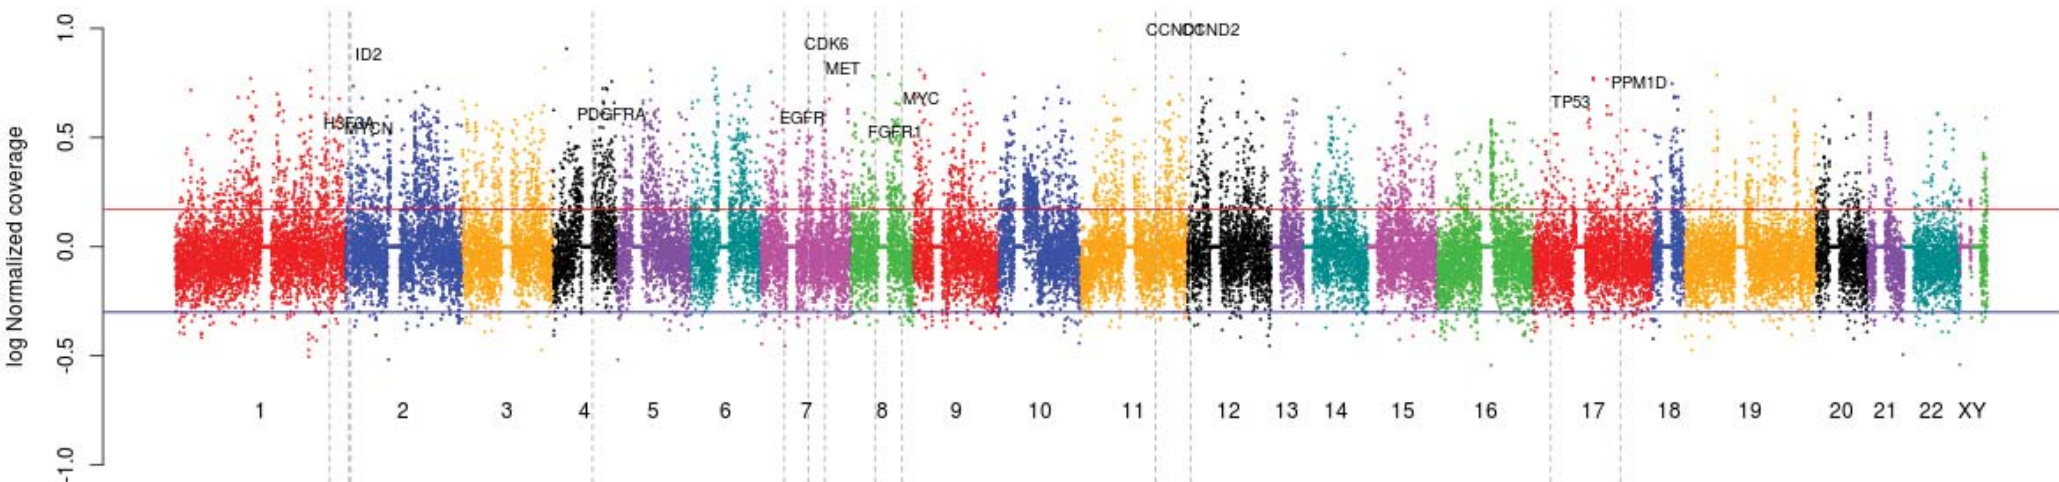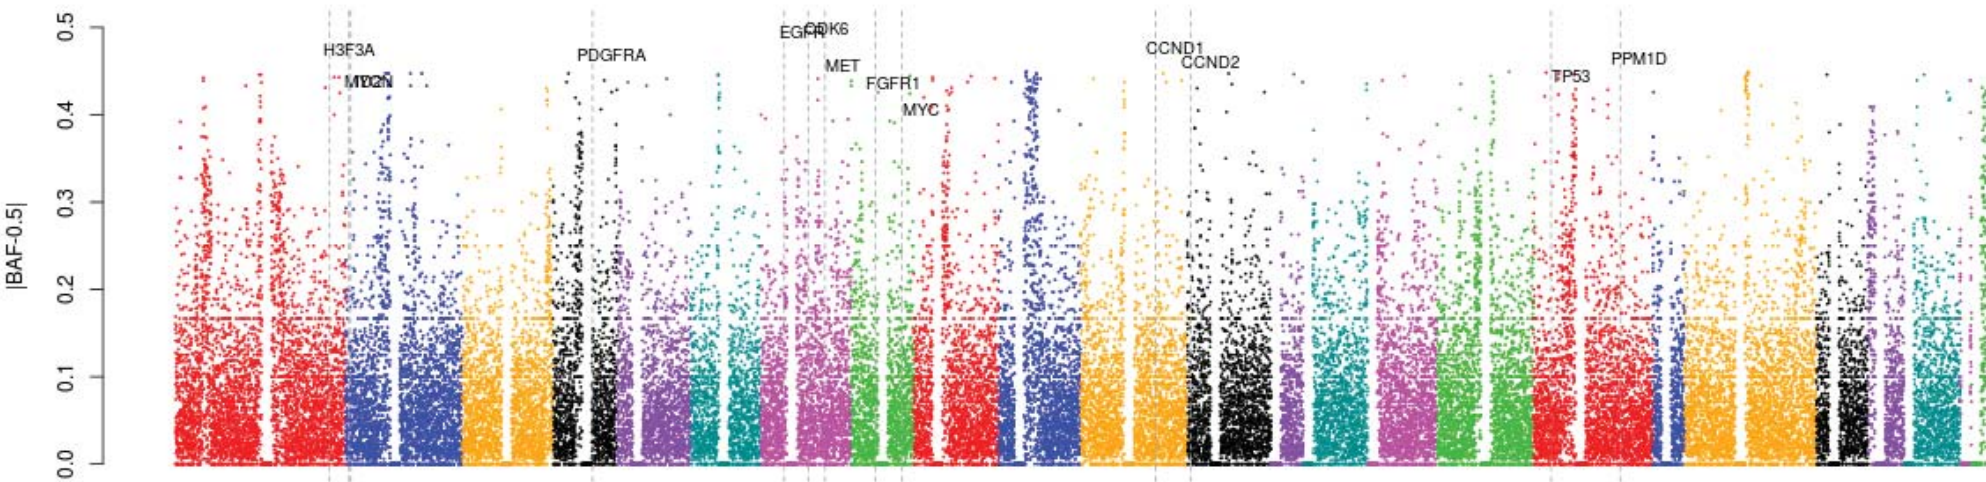

### DIPG9-Medulla 1

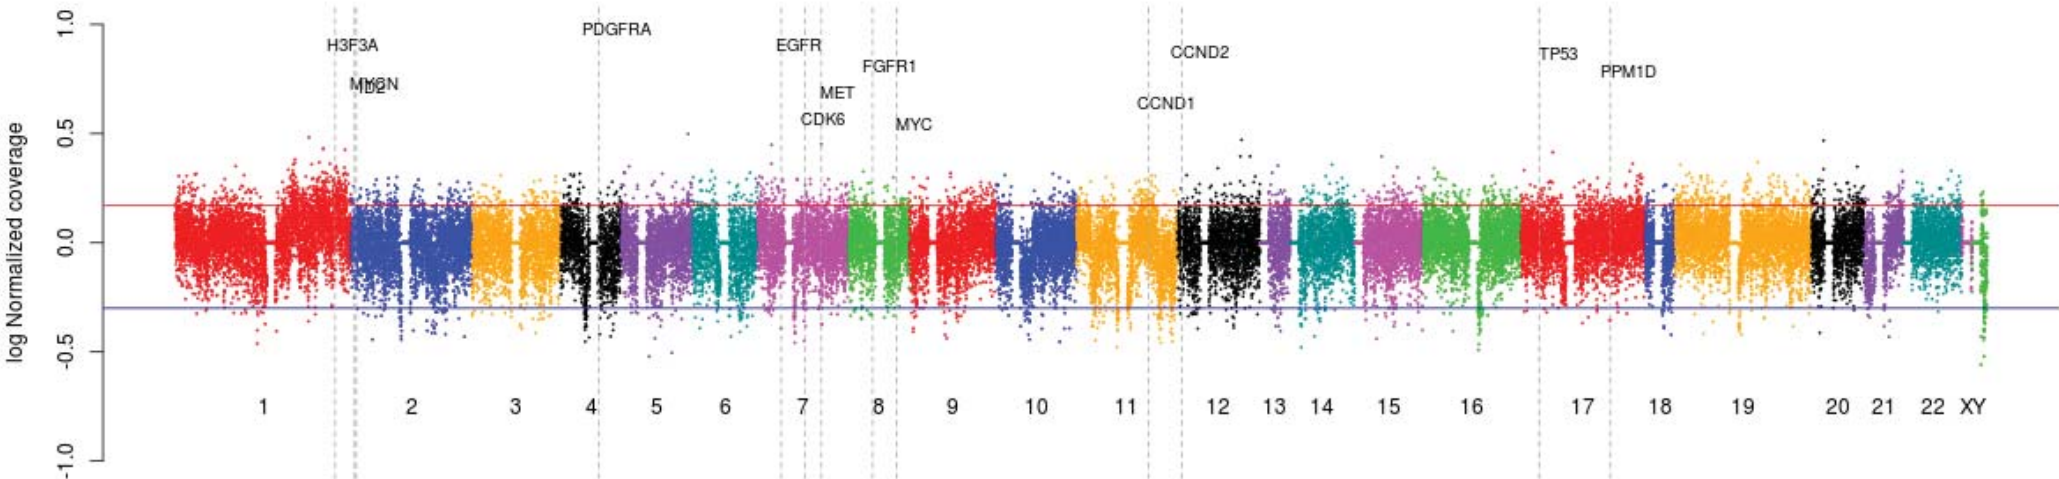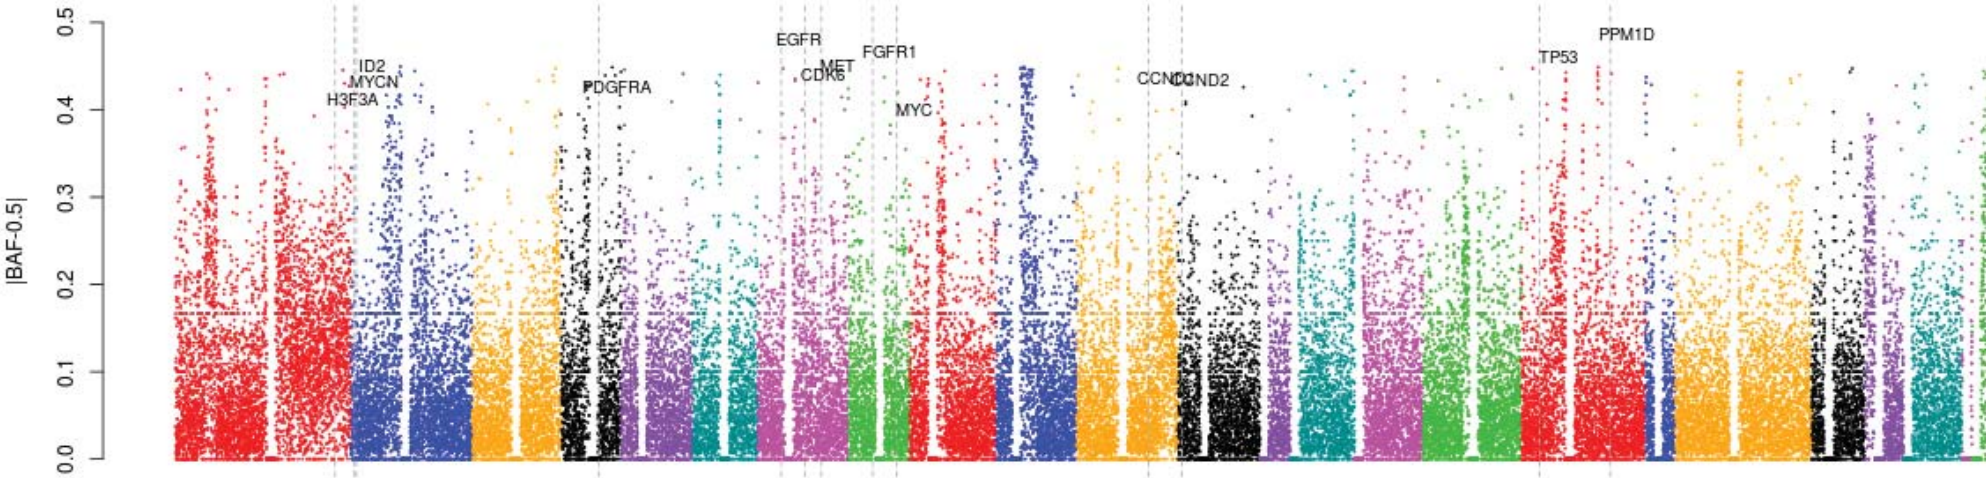



### DIPG9-Midbrain

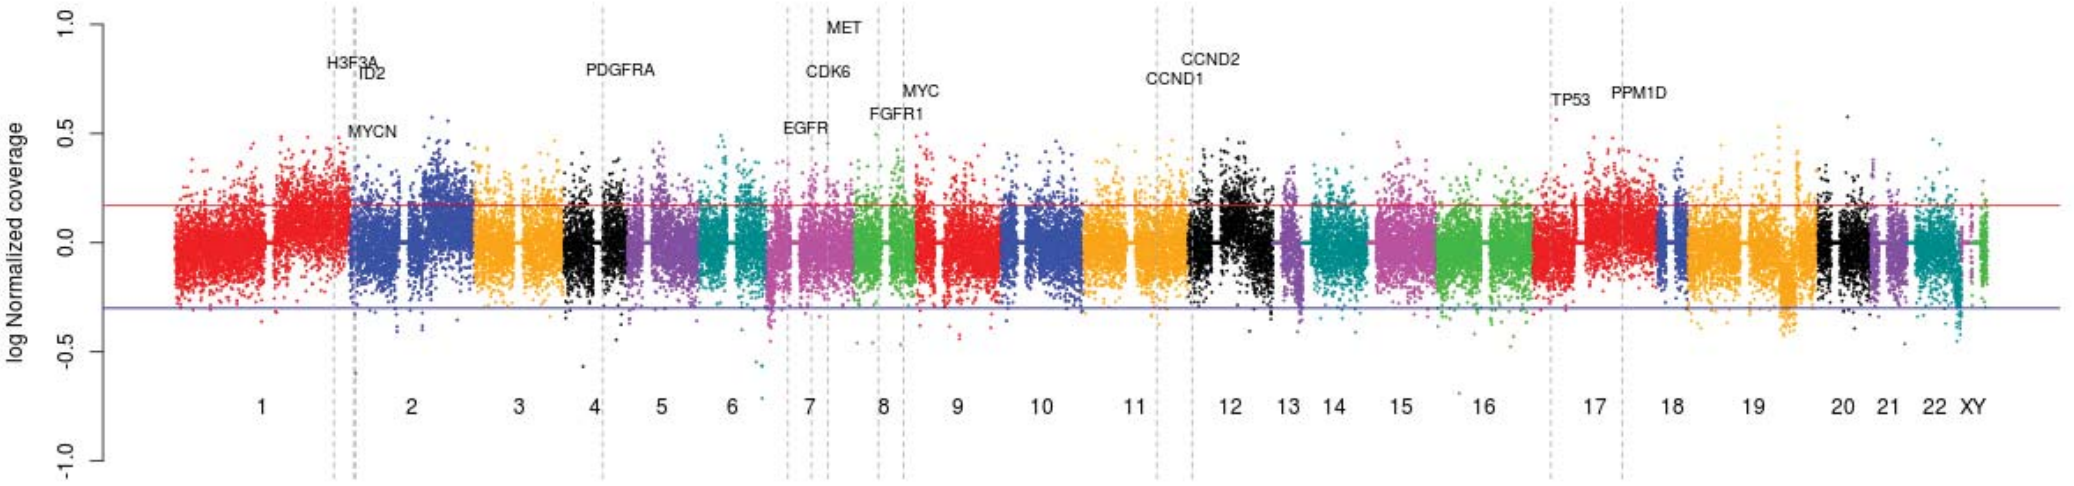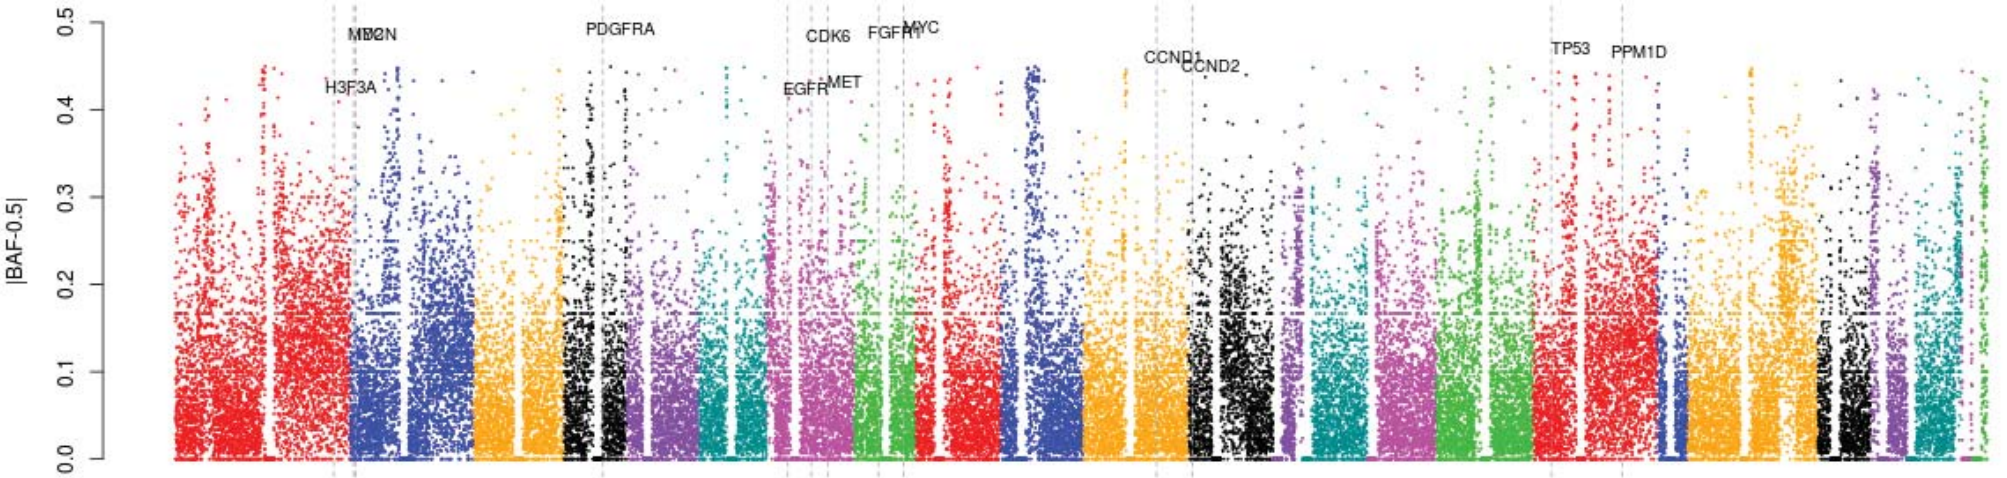

### DIPG9-Parietal Lobe 3

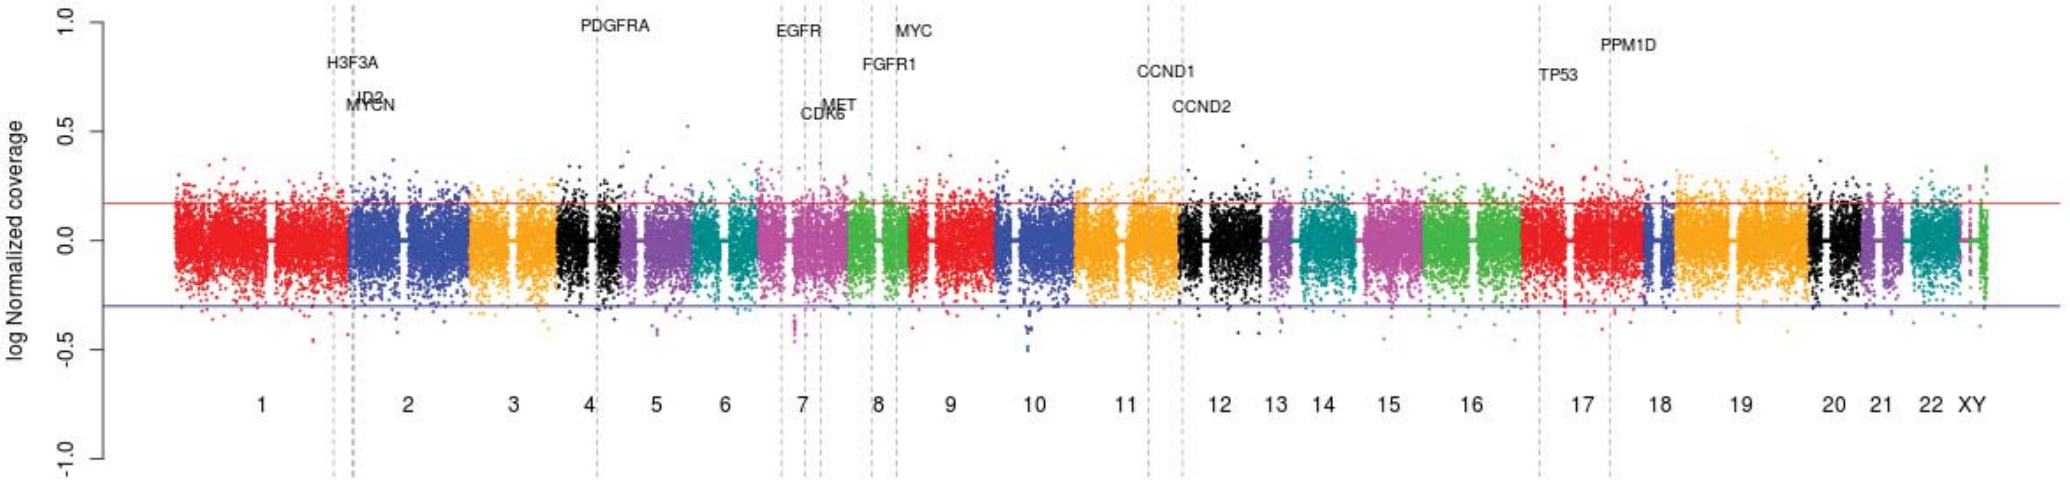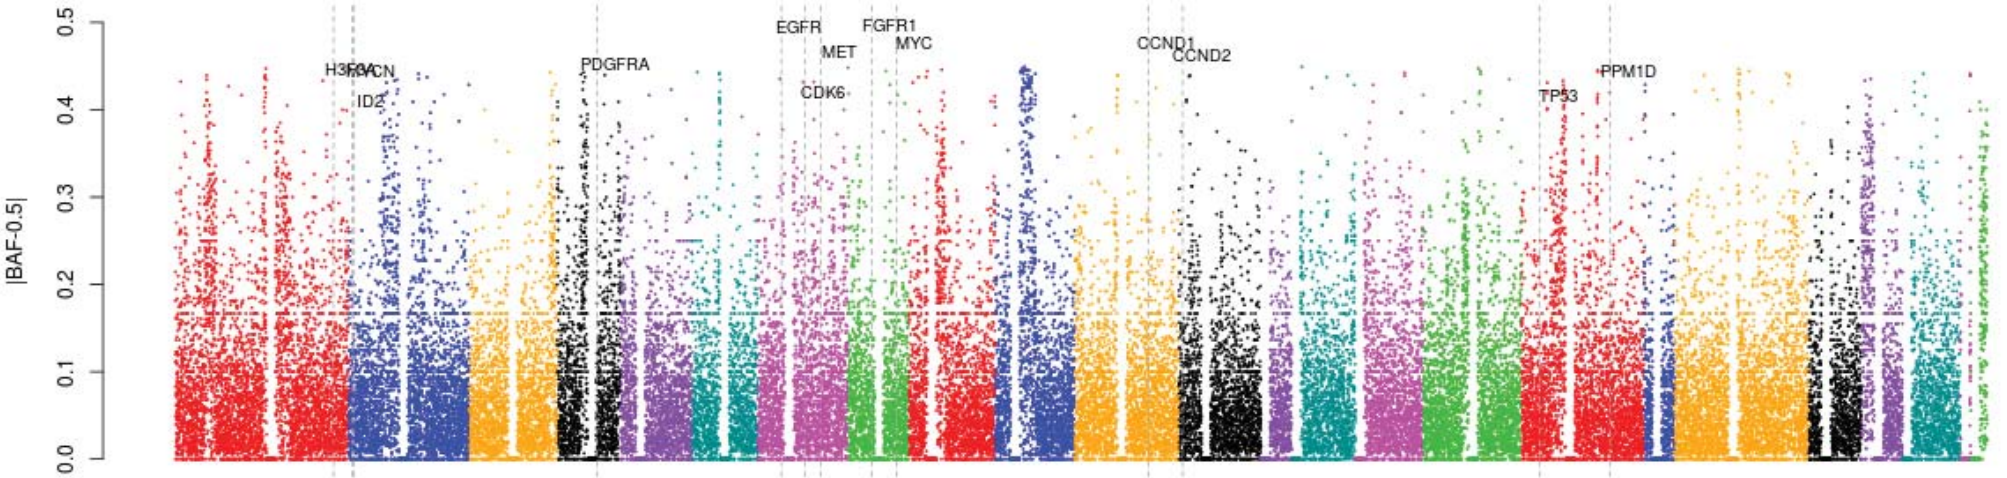



### DIPG9-Pons 1

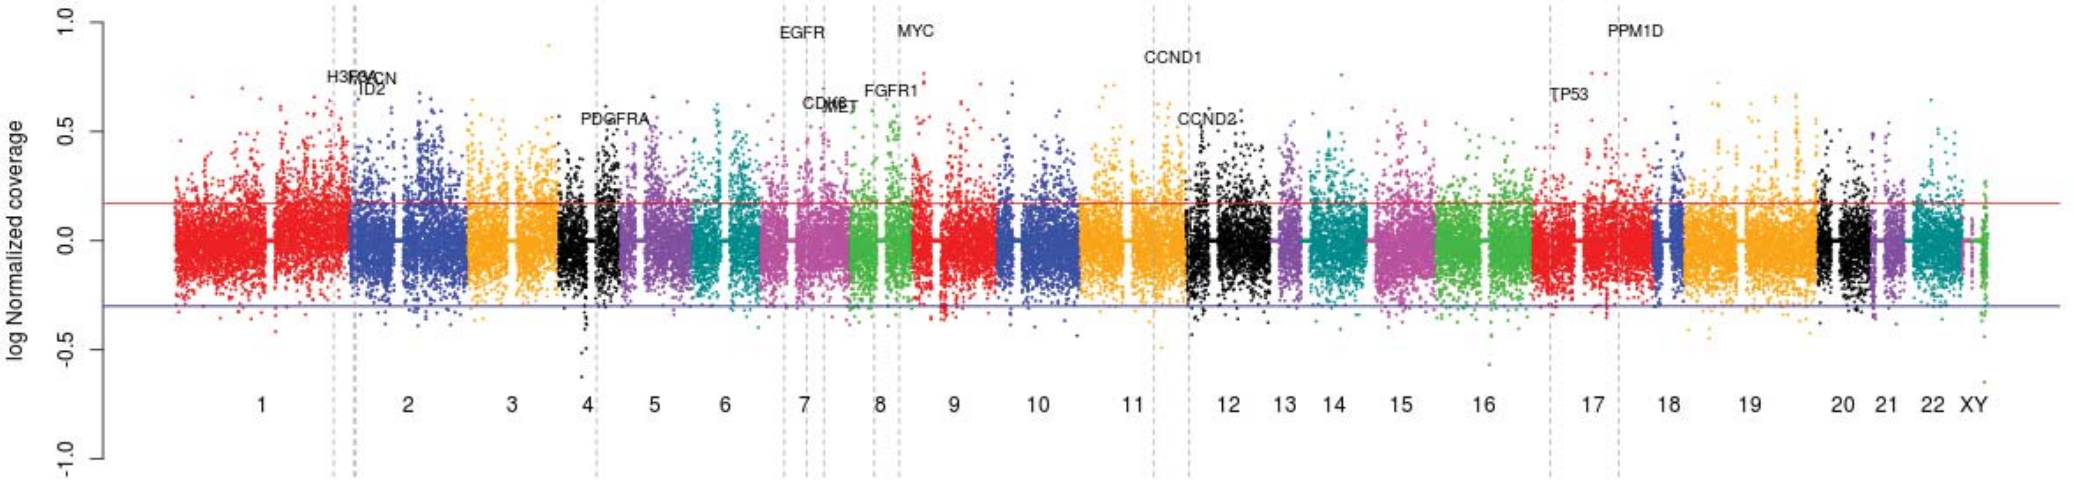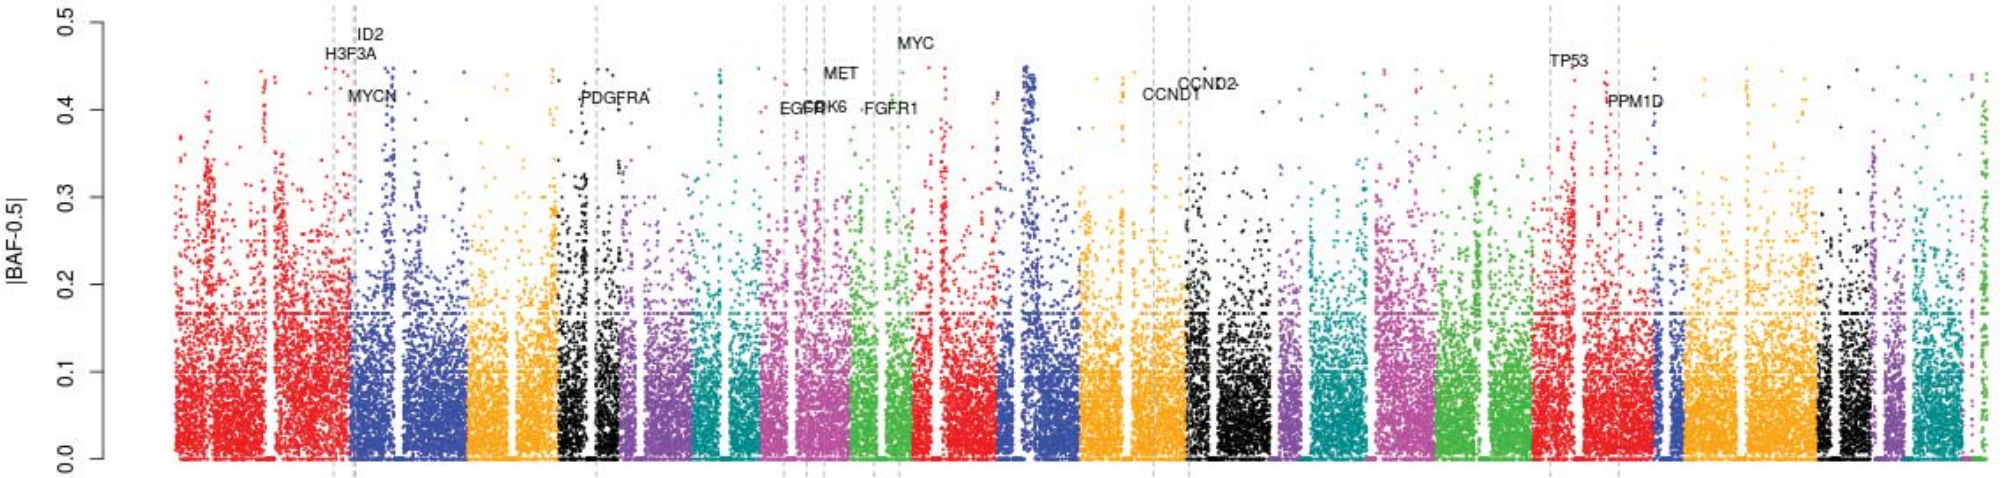

### DIPG9-Temporal Lobe 3

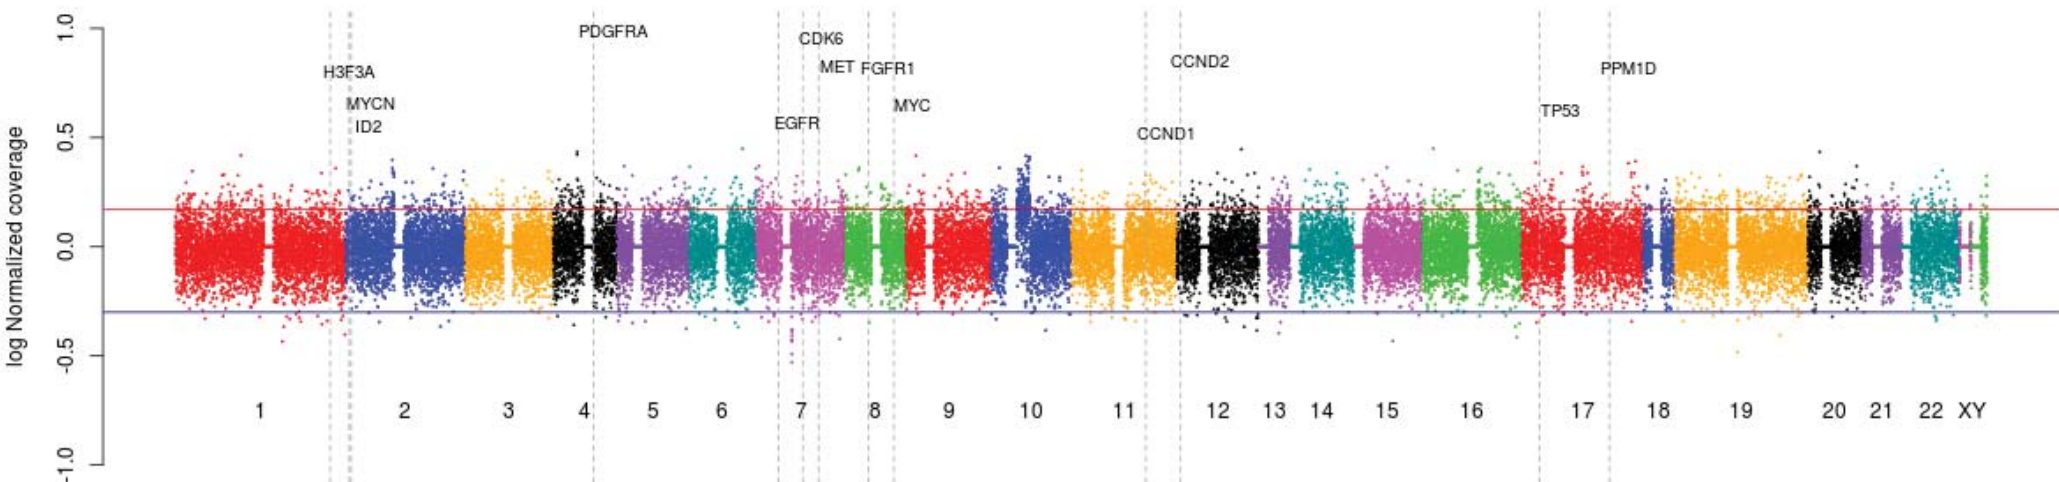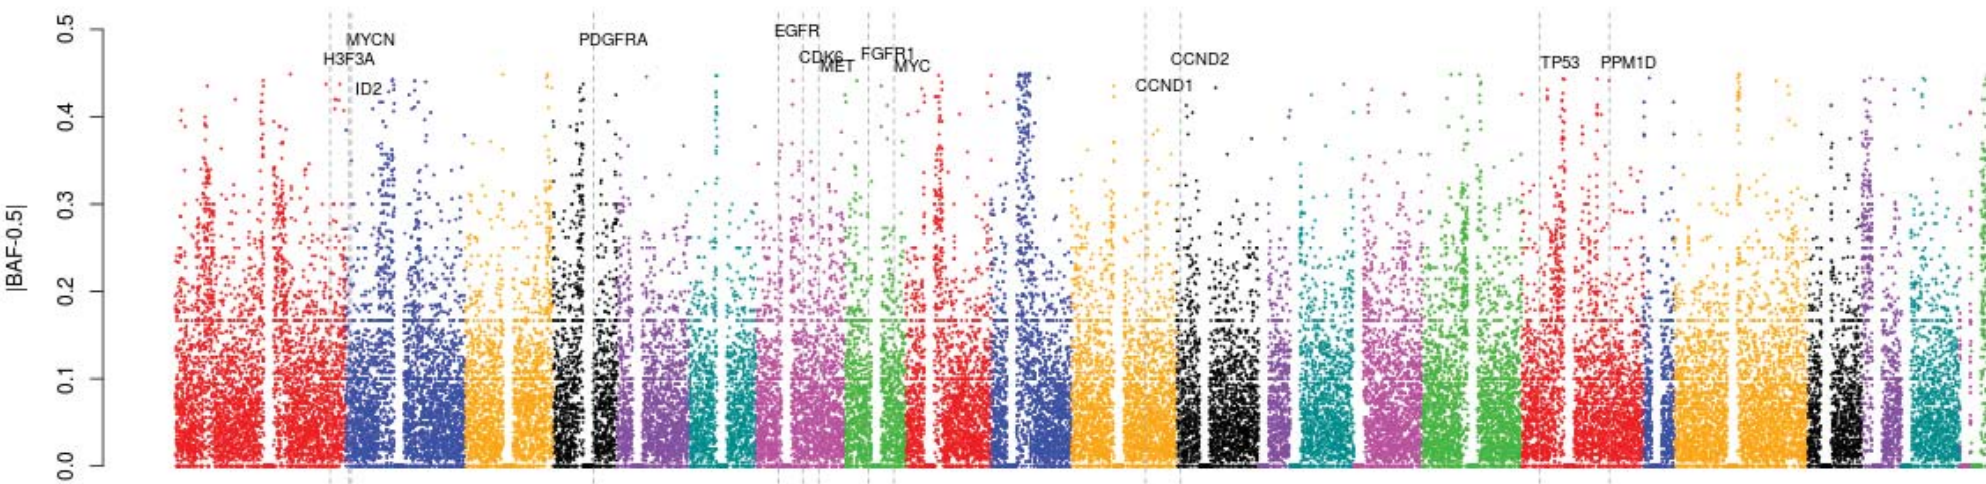



### DIPG9-Ventricle

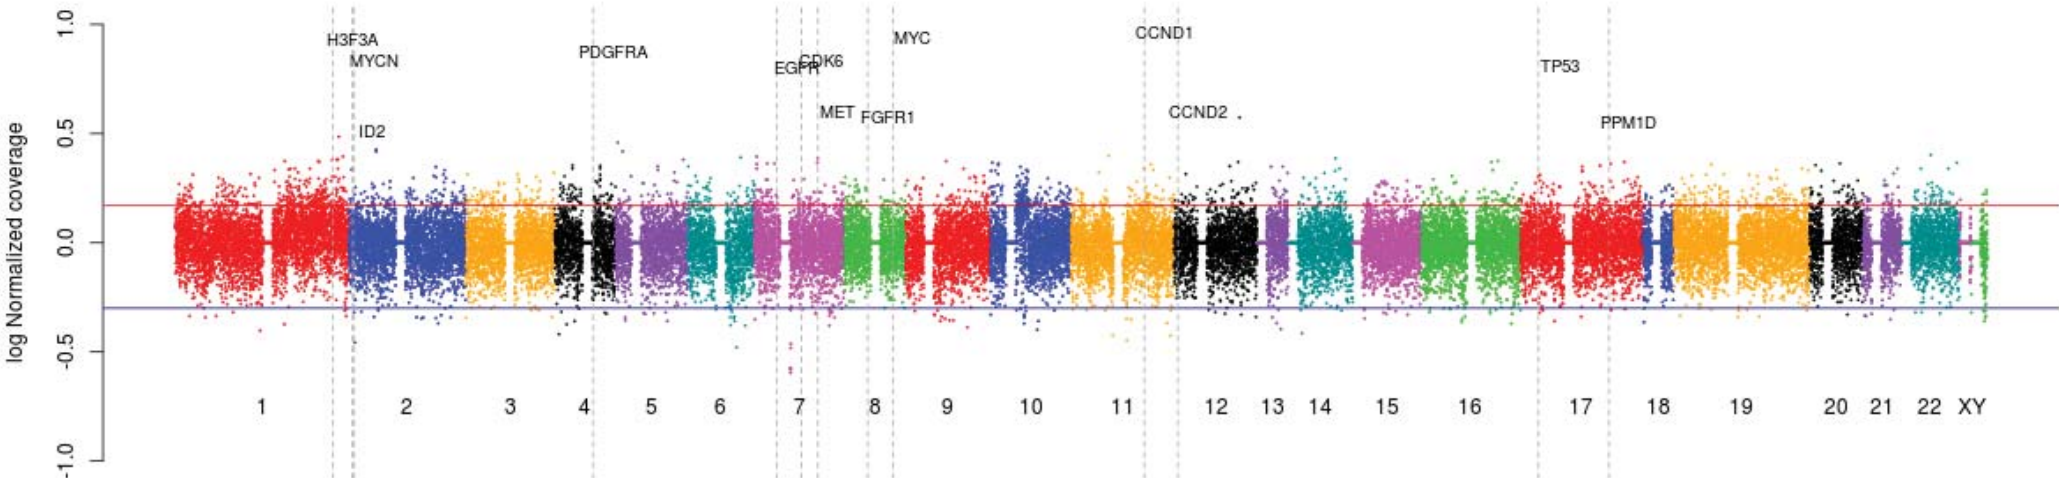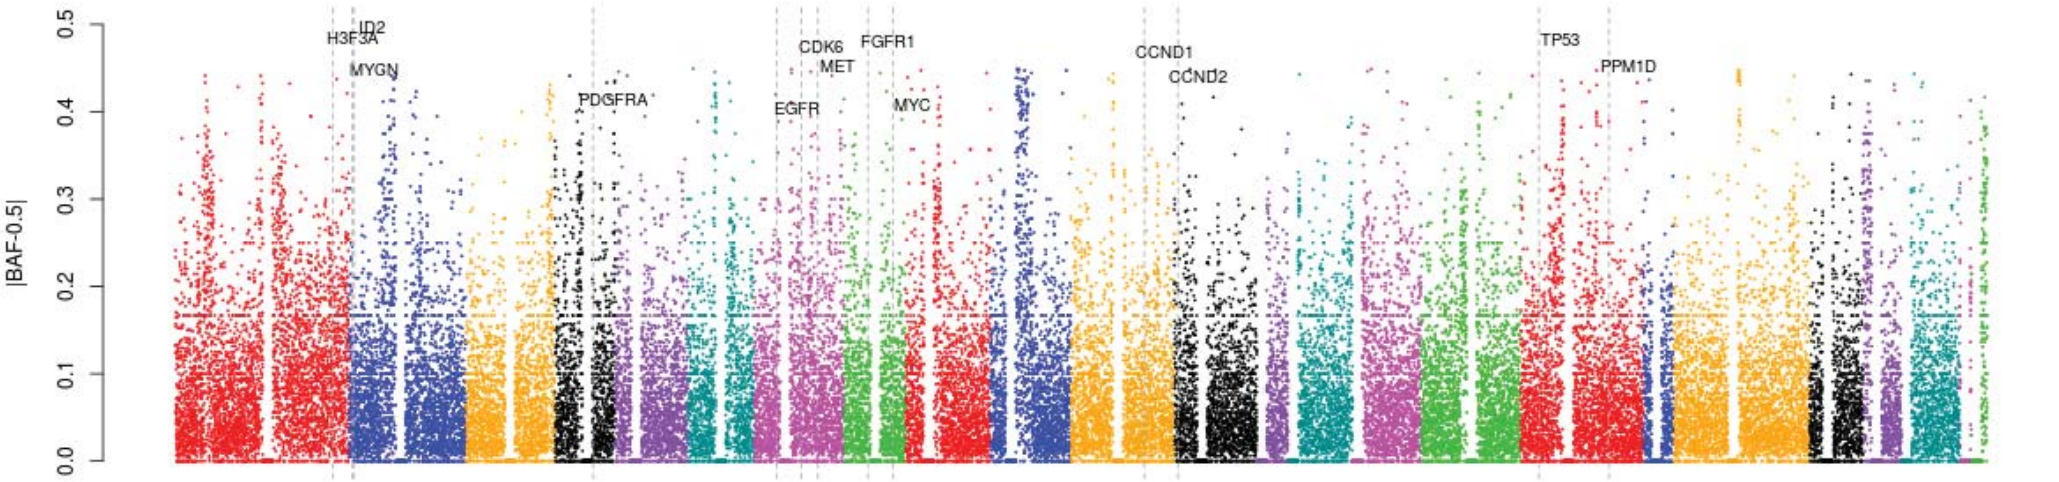

**Supplementary Figure 5: CNV calling using whole exome sequencing data.** Whole exome sequencing data was used to estimate copy number variation events in DIPG samples using deviation of B allele frequency from 50% as well as normalized coverage data (See online methods).



# Supplementary Figure 6

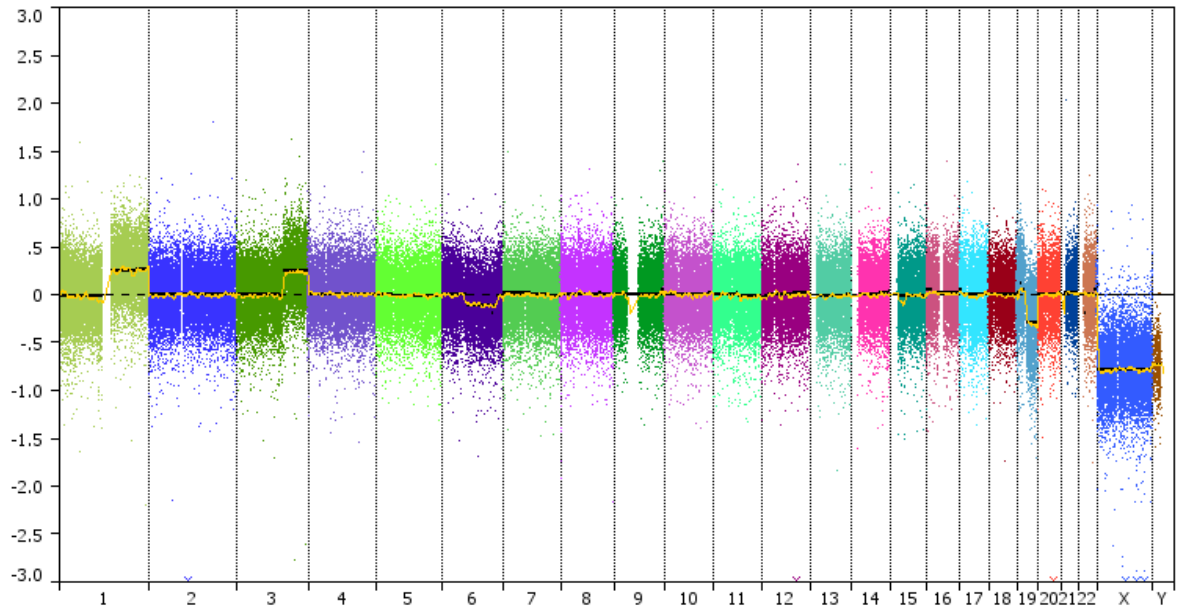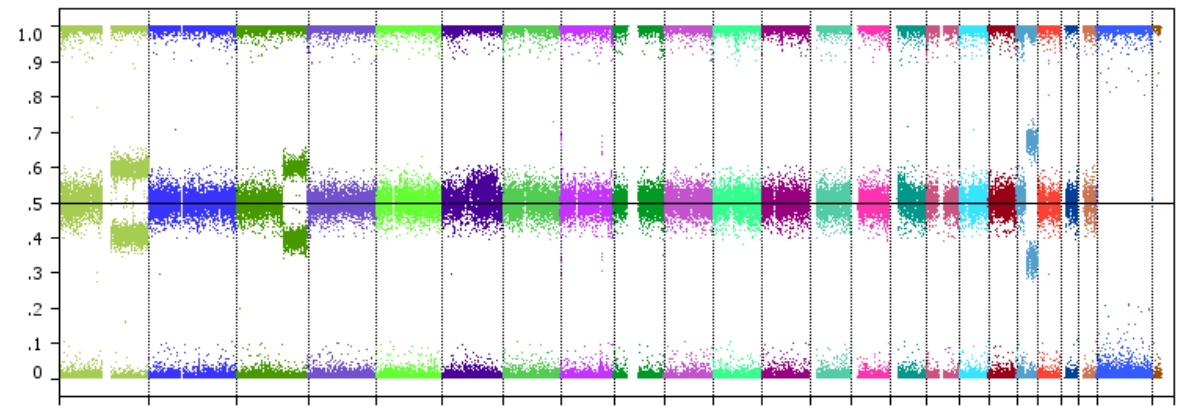

DIPG1-Pons1

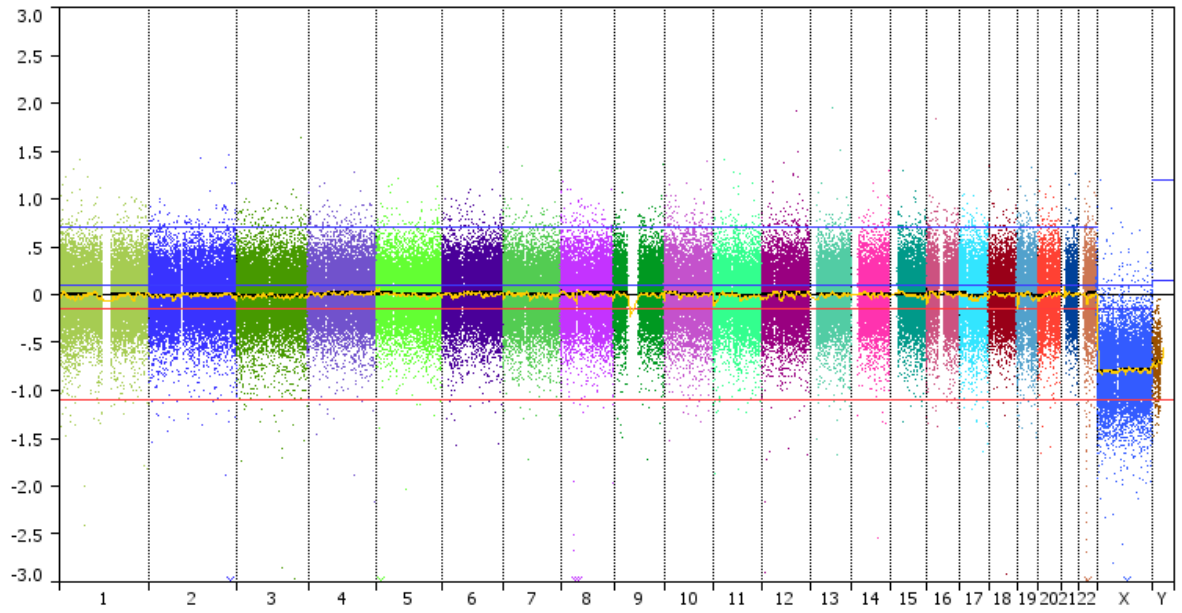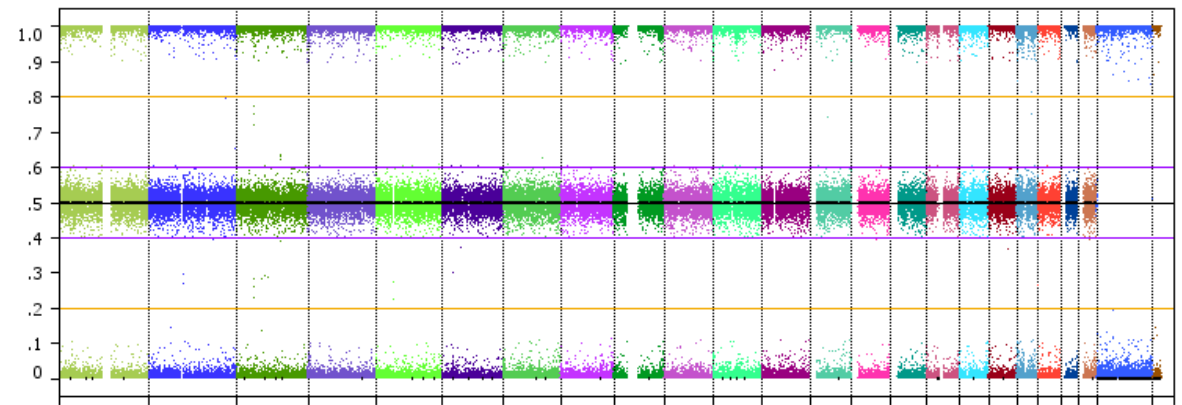

DIPG2-Cerebellum3



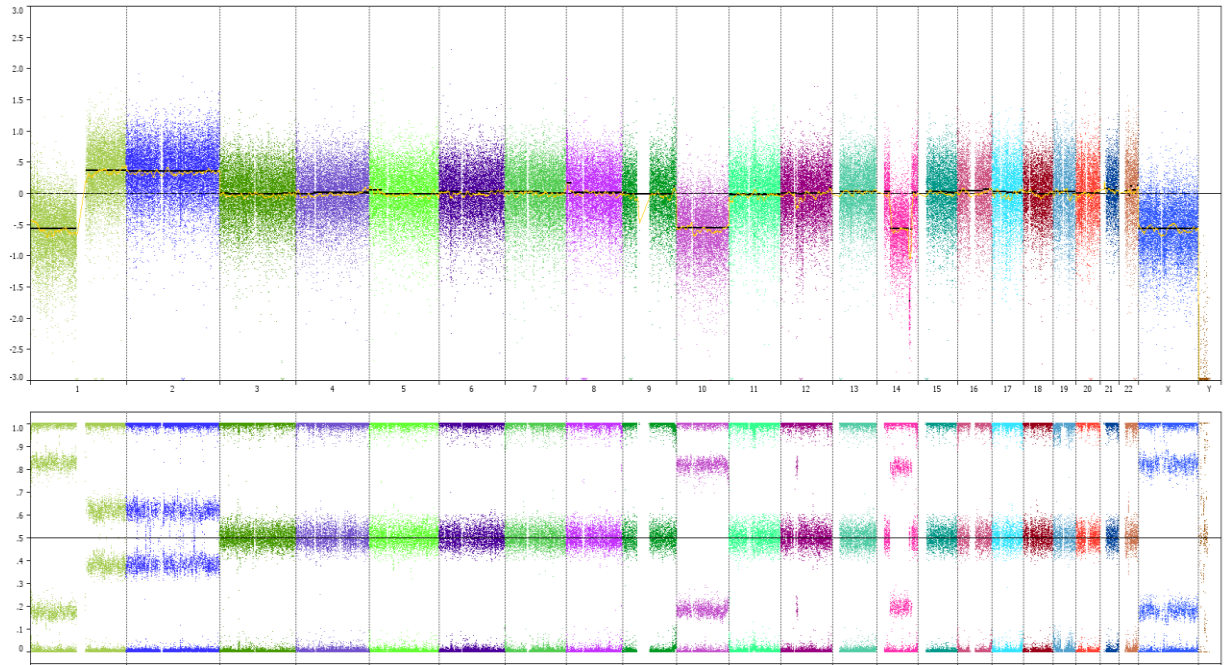

DIPG3-Pons2

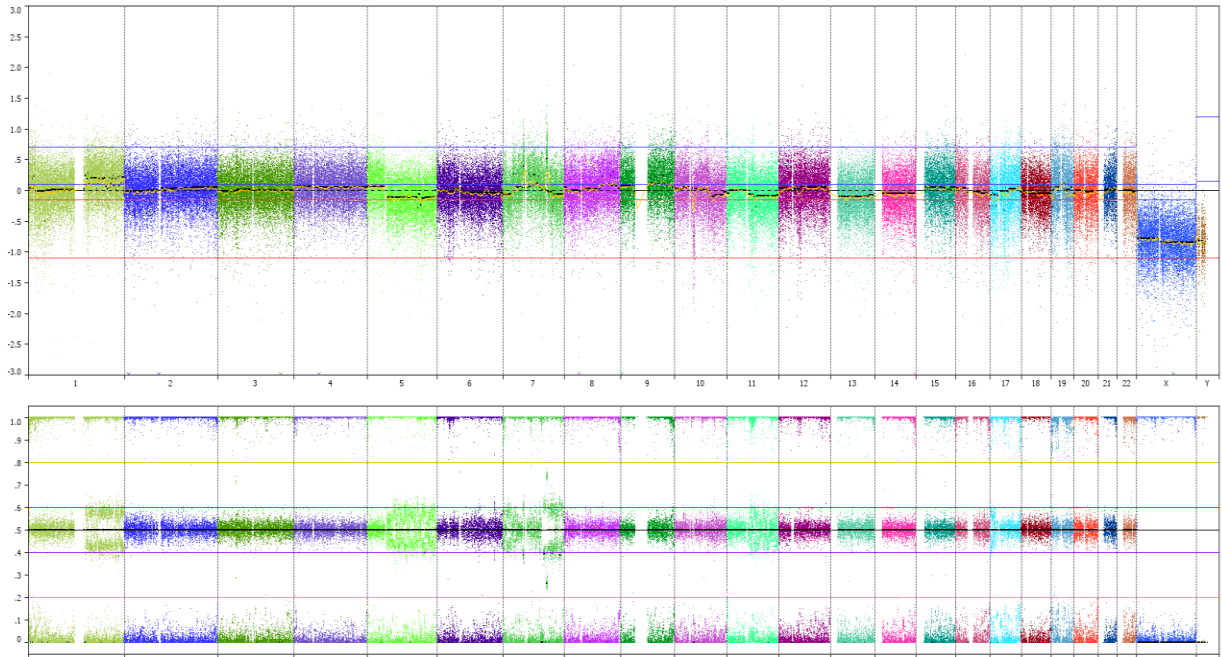

DIPG5-Pons1



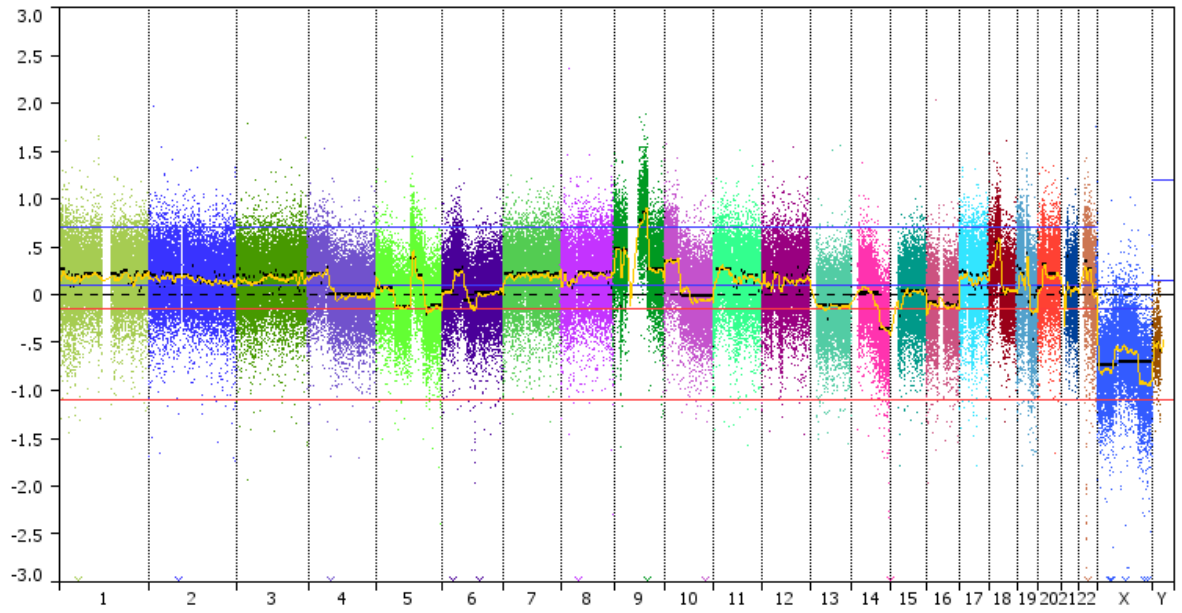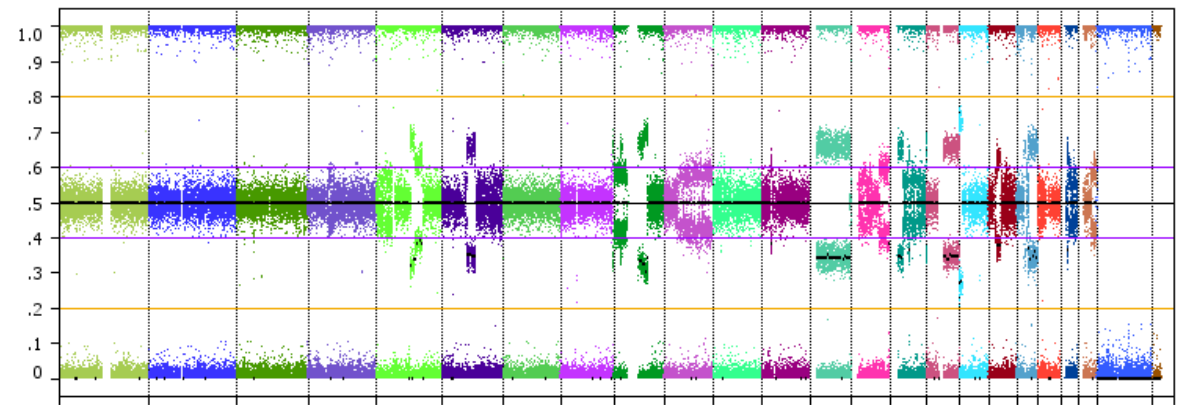

DIPG6-Pons5

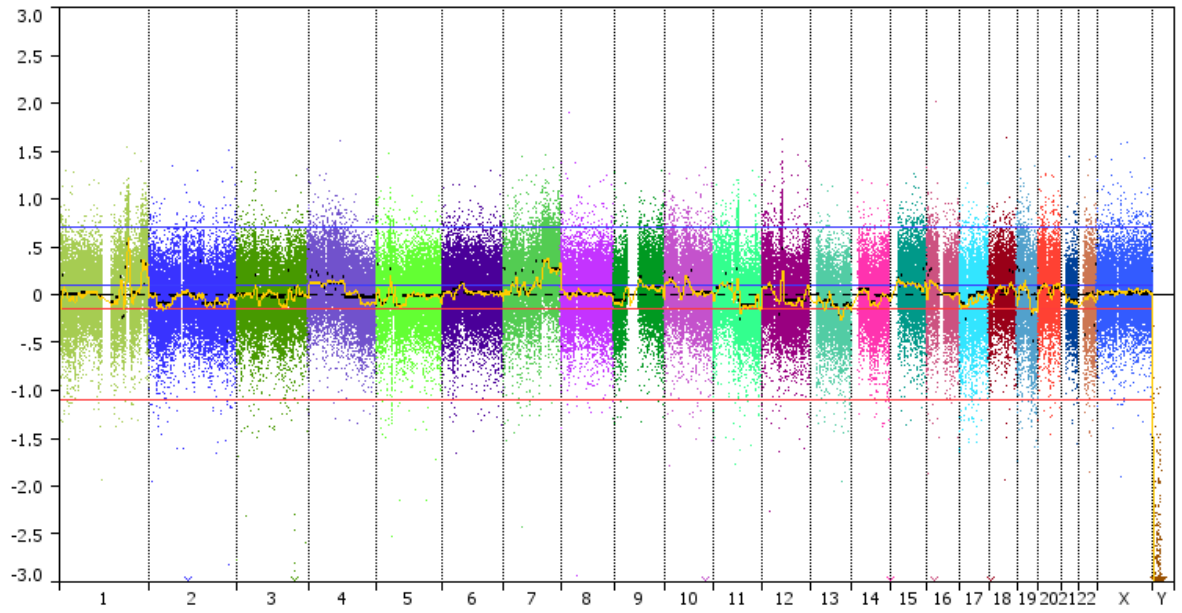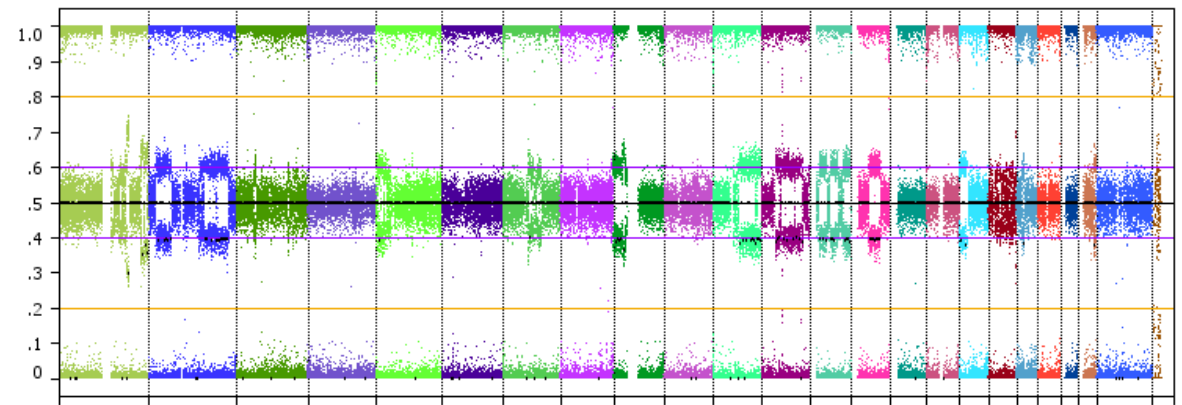

DIPG7-Cerebellum1



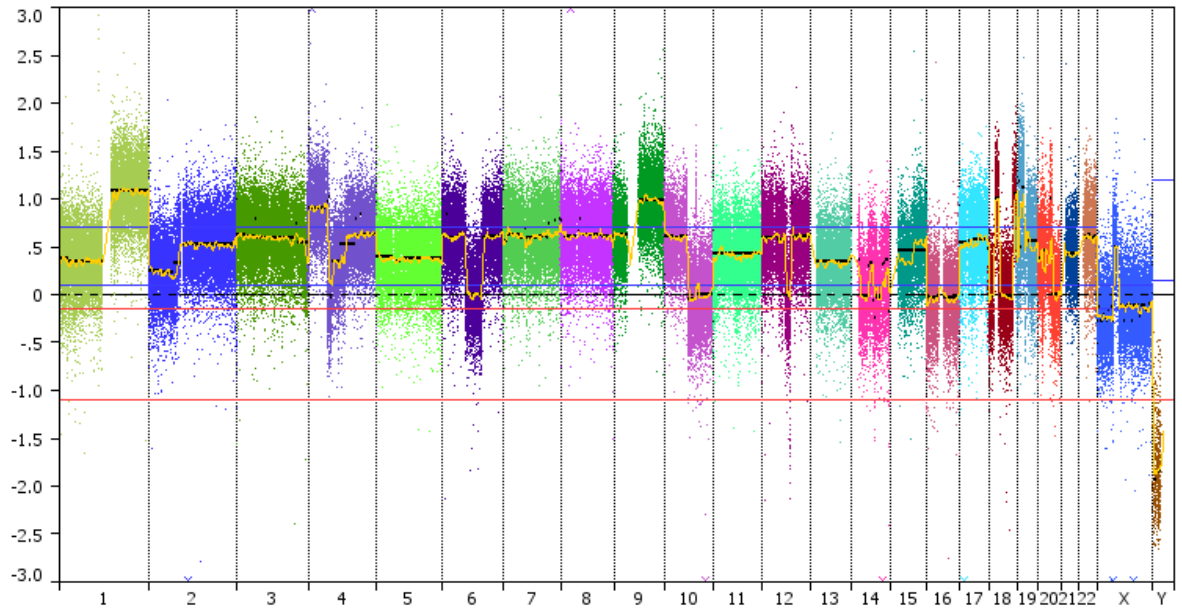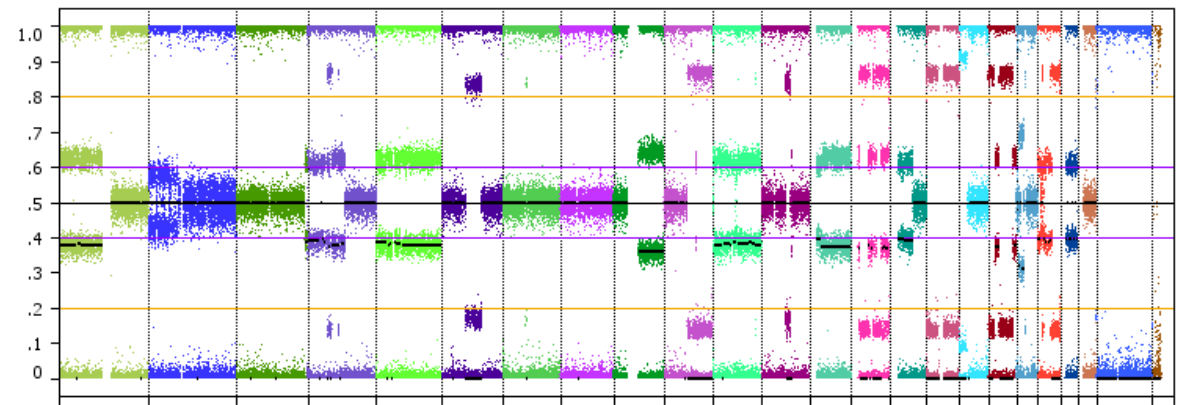

DIPG8-Midbrain

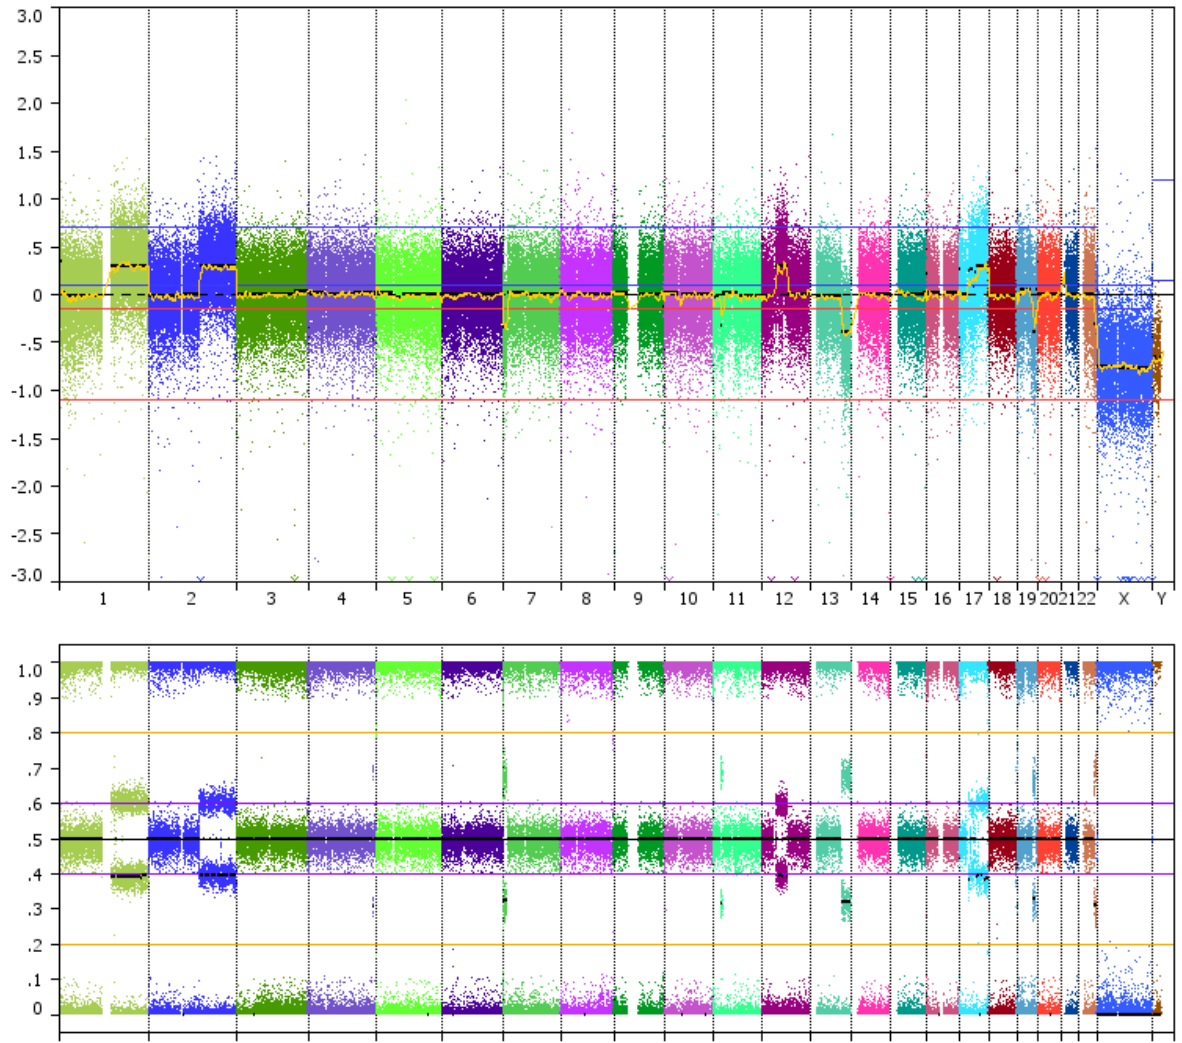

DIPG9-Midbrain

**Supplementary Figure 6:** OncoScan CNV arrays were used on selected samples to validate whole exome sequencing based CNV calling. Using the same DNA used for whole exome sequencing, one sample from each patient was selected to assess copy number variation events (except for patient DIPG4 for which no material was available). OncoScan results shown here correlated with whole exome based CNV calling.



DIPG1

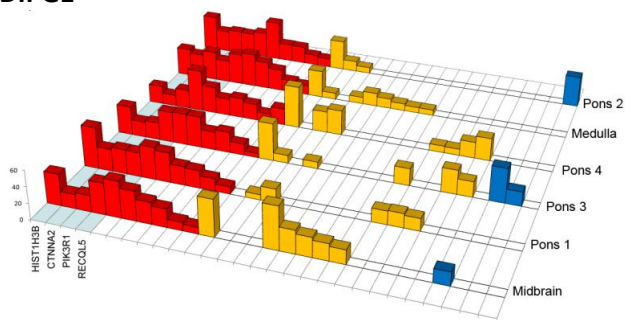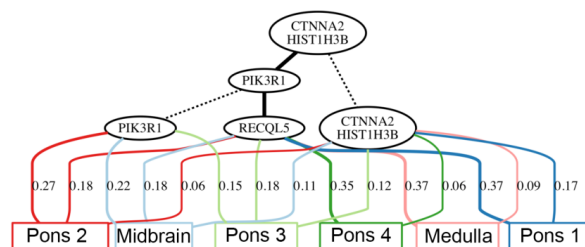

DIPG3

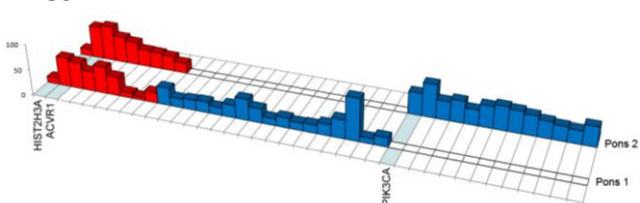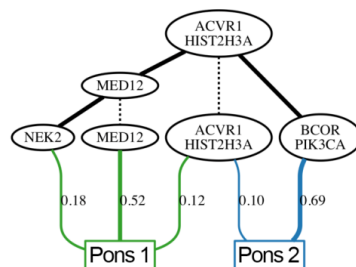

DIPG4\*

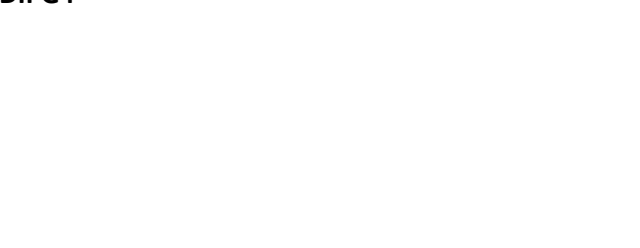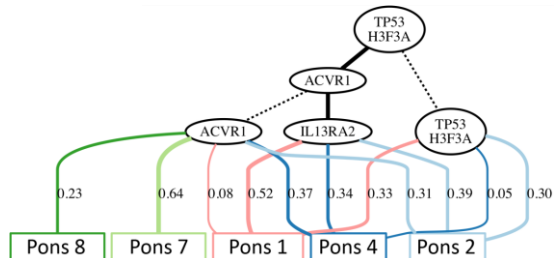

DIPG7

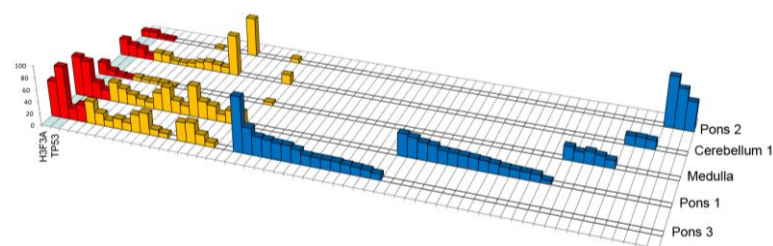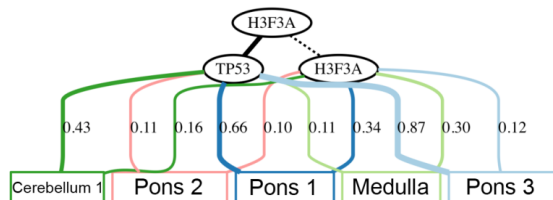

DIPG8

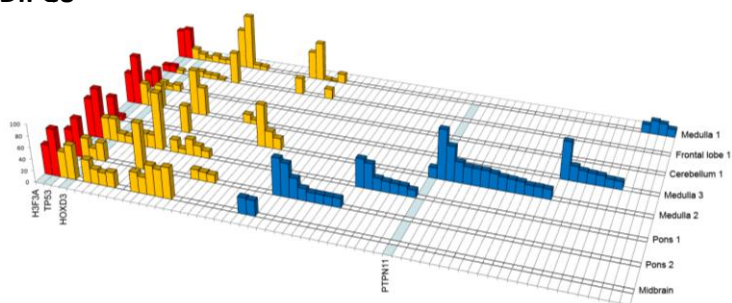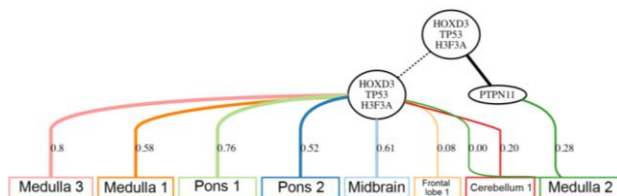

DIPG 9

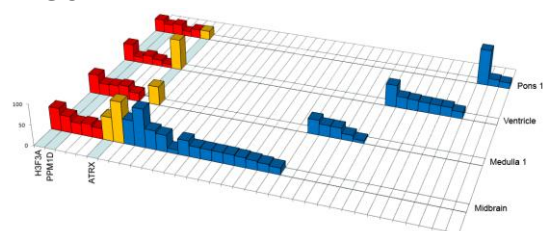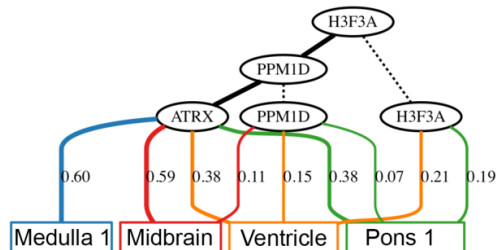

**Supplementary Figure 7: Evolutionary reconstruction and non-synonymous somatic mutations allele frequency values for six patients** (not included in Figure 2). Left: Histograms represent the raw allele frequency values from whole exome sequencing data (Supplementary table 2.) Right: Evolutionary trees reconstructed using CNV corrected allele frequencies from the deep amplicon sequencing data targeting the candidate genes found in whole exome sequencing.

\*We had access to whole exome sequencing data from only one sample for patient DIPG4. The evolutionary tree for this patient was reconstructed based on deep amplicon sequencing data, except the frequency values were not corrected for CNV events (due to lack of whole exome sequencing data on the rest of the samples from this patient.) Lacking a robust correction for copy number, we consider this phylogeny less reliable and hence do not discuss it in the main text.



## Supplementary Figure 8

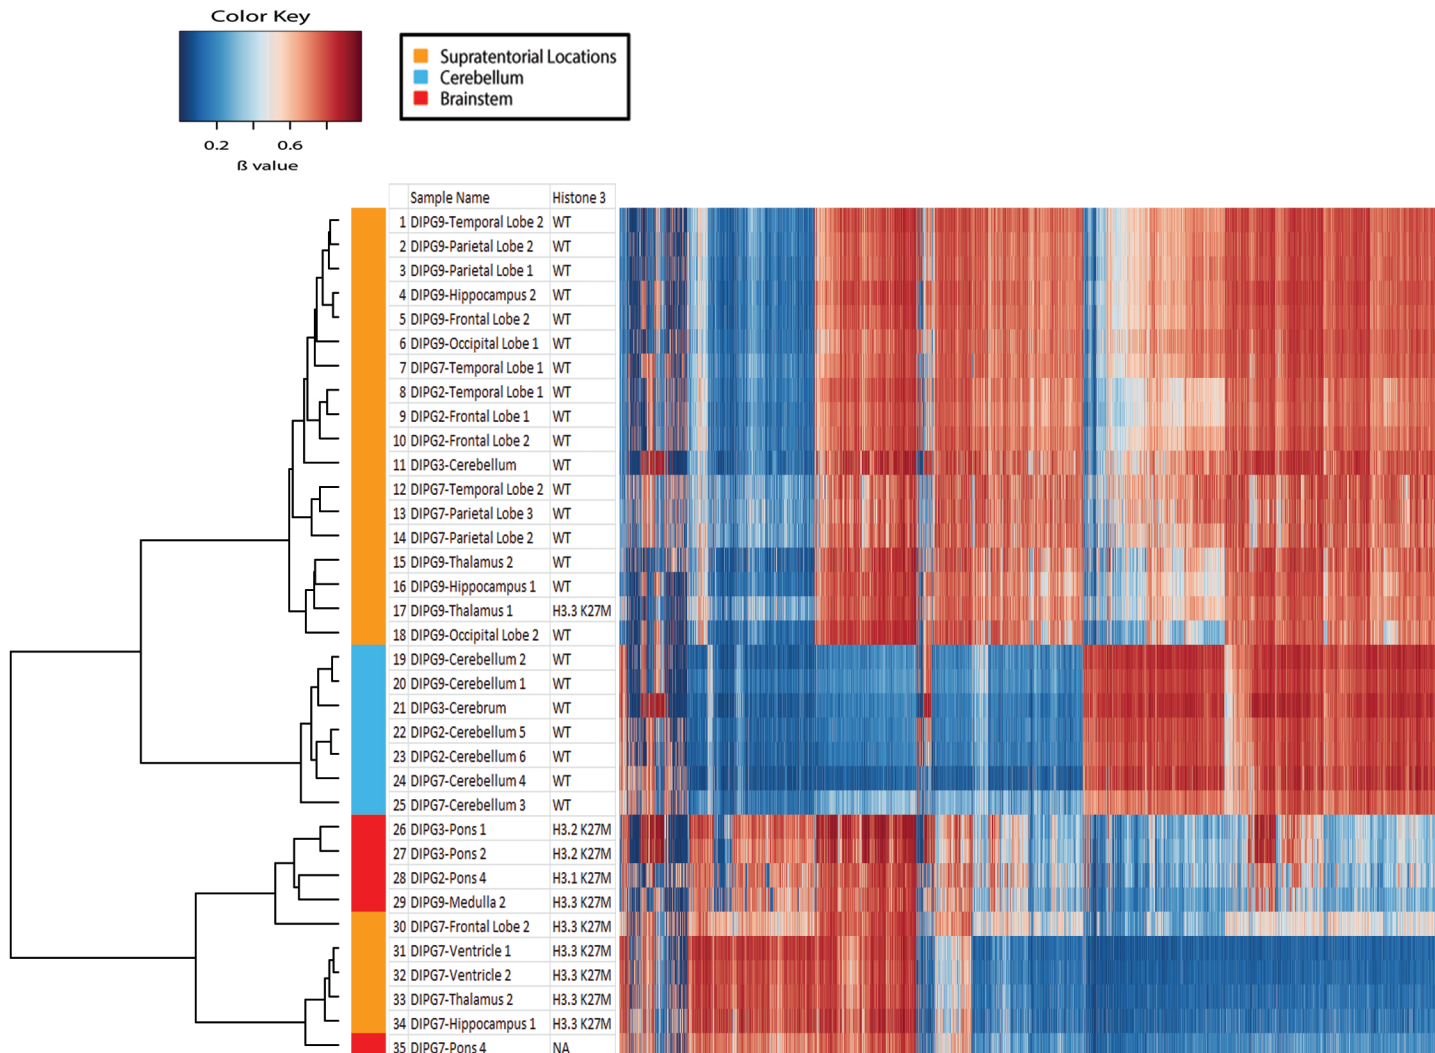

**Supplementary Figure 8. Clustering analysis of global DNA methylation from various neuroanatomical locations for four DIPGs.** Samples representing histone 3 K27M and wild type neuroanatomical locations for DIPG2 (H3.1-K27M), DIPG3 (H3.2-K27M), DIPG7 and DIPG9 (H3.3-K27M) were analyzed using unsupervised hierarchical clustering for the 5000 most variable probes. Global DNA methylation clustering demonstrates clustering patterns based on histone 3 mutation status, rather than neuroanatomical location. DIPG9 thalamus 1 is a H3-K27M sample clustering with the H3-WT group possible due to the presence of only few tumor cells only detectable by sensitive genomic screening and which based on their low content do not alter the global methylation profile.

## Supplementary Figure 9

DIPG7

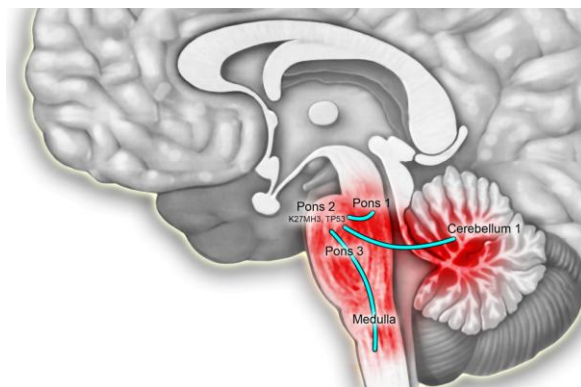

DIPG8

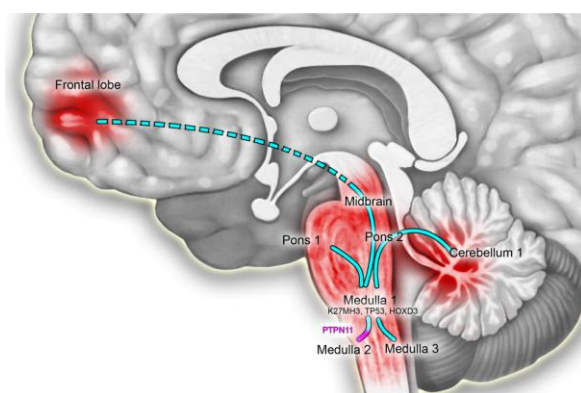

DIPG9

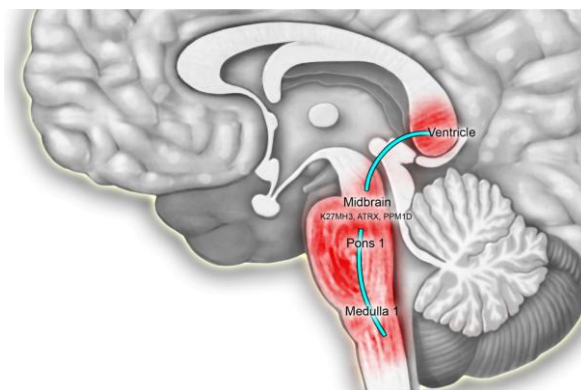

**Supplementary Figure 9: Tumor spread outside the brain stem in patients DIPG7, DIPG8, and DIPG9.** In DIPG7, spread to cerebellum and across the brain stem is consistent with early event in tumor evolution as it does not harbor additional mutations. In DIPG8, the anatomical spread path towards the frontal lobe is not known and hence is represented as a dashed line (--). Spread to “Medulla 2” in this patient is presumed to happen relatively later than the spread towards the cerebellum since it harbors an additional PTPN1 mutation. The spread towards the medulla and ventricle in DIPG9 is suggested to also happen relatively late in tumor evolution since both samples in these areas share the subclonal ATRX and PPM1D mutations seen in the primary tumor.



## Supplementary Figure 10

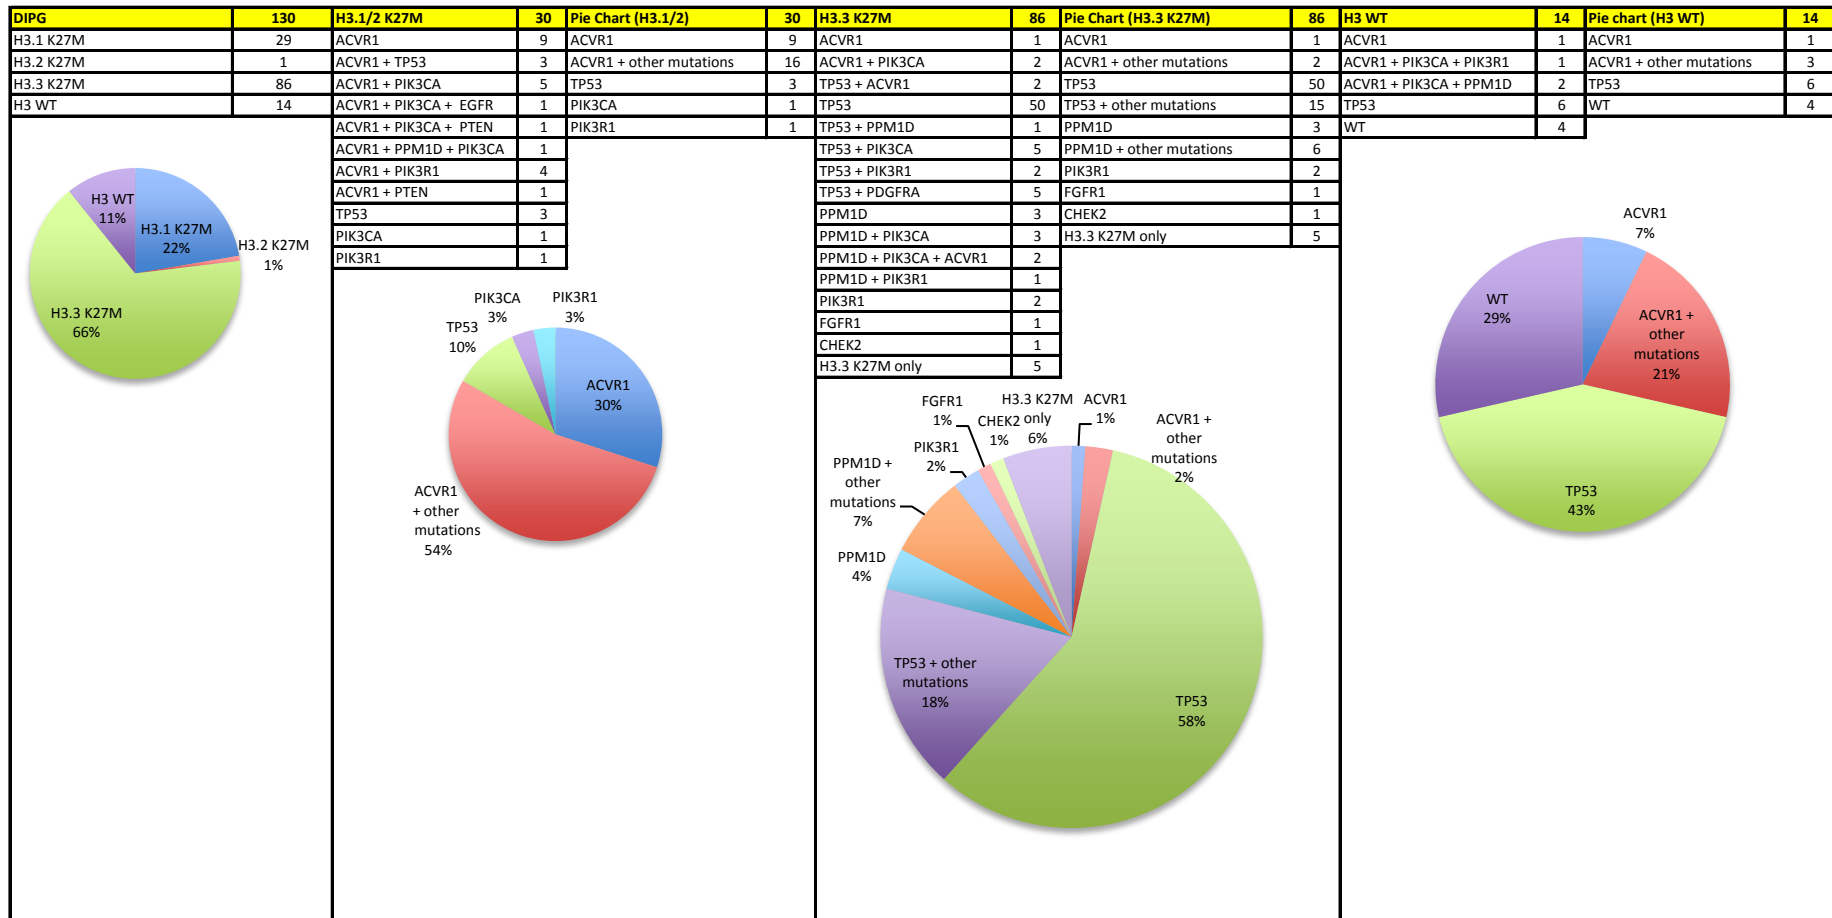

**Supplementary Figure 10:** Summary of integrated dataset of Diffuse Intrinsic Pontine Glioma samples from four published studies (n=121) and present work (n=9) showing distribution of histone 3 mutation status as well as mutation combinations of oncohistone partners for all patients. For a detailed list, please refer to Supplementary Table 15.

Supplementary Table 1: Clinical and Molecular Data from 134 Punch Cores Taken From Autopsy Brains of 9 DIPG patients

| PATIENT INFORMATION   |            |        |        |                               |           | MOLECULAR ANALYSES   |                          |             |                    |           |             |           |                        |                                  |                                                                           |              | IMMUNOHISTOCHEMISTRY |                   |           |                               |          |         |           |   |                                      |   |   |   |   |   |
|-----------------------|------------|--------|--------|-------------------------------|-----------|----------------------|--------------------------|-------------|--------------------|-----------|-------------|-----------|------------------------|----------------------------------|---------------------------------------------------------------------------|--------------|----------------------|-------------------|-----------|-------------------------------|----------|---------|-----------|---|--------------------------------------|---|---|---|---|---|
| Patient ID            | Diagnosis  | Gender | Age    | Treatment                     |           | MISEQ RUN 1 (2014)   |                          |             | MISEQ RUN 2 (2015) |           |             |           | Whole Exome Sequencing |                                  |                                                                           |              | Stains               |                   |           |                               | Comments |         |           |   |                                      |   |   |   |   |   |
|                       |            |        |        | Chemotherapy                  | Radiation | Sample Name          | Neuroanatomical Location | Tissue Type | ddPCR Run1         | Histone 3 | Other Genes | Histone 3 | Other Genes            | Methylation                      | RNA-Seq                                                                   | ddPCR Run2   | Histone 3            | Other Genes       | H&E       | Ki67                          |          | H3 K27M | H3 K27me3 |   |                                      |   |   |   |   |   |
| DIPG1 (H3.1)          | DIPG (GBM) | Male   | 21y 2m | SAHA, Avastin, and Irinotecan | Yes       | DIPG1-Frontal Lobe 1 | B                        | Frozen      |                    |           | WT          |           |                        |                                  |                                                                           |              | 1 core punch         | WT                | WT        | no mutations                  |          |         |           |   | cerebral cortex & cerebellum is FFPE |   |   |   |   |   |
|                       |            |        |        |                               |           | DIPG1-Frontal Lobe 2 | B                        | FFPE        |                    |           |             |           |                        |                                  |                                                                           |              |                      |                   |           |                               |          |         |           | √ |                                      |   | √ | √ |   |   |
|                       |            |        |        |                               |           | DIPG1-Cerebellum 1   | E                        | FFPE        |                    |           |             |           |                        |                                  |                                                                           |              |                      |                   |           |                               |          |         |           |   |                                      | √ | √ | √ | √ |   |
|                       |            |        |        |                               |           | DIPG1-Cerebellum 2   | E                        | FFPE        |                    |           |             |           |                        | WT                               |                                                                           |              |                      | H3.1B K27M (4.6%) | failed    | failed                        |          |         |           |   |                                      | √ | √ | √ | √ |   |
|                       |            |        |        |                               |           | DIPG1-Ventricle 1    | F                        | FFPE        |                    |           |             |           |                        |                                  |                                                                           |              |                      |                   |           |                               |          |         |           |   |                                      | √ | √ | √ | √ |   |
|                       |            |        |        |                               |           | DIPG1-Ventricle 2    | F                        | FFPE        |                    |           |             |           |                        |                                  |                                                                           |              |                      |                   |           |                               |          |         |           |   |                                      | √ | √ | √ | √ |   |
|                       |            |        |        |                               |           | DIPG1-Hippocampus    | G                        | FFPE        |                    |           |             |           |                        |                                  |                                                                           |              |                      |                   |           |                               |          |         |           |   |                                      | √ | √ | √ | √ |   |
|                       |            |        |        |                               |           | DIPG1-Thalamus       | H                        | FFPE        |                    |           |             |           |                        |                                  |                                                                           |              |                      |                   |           |                               |          |         |           |   |                                      | √ | √ | √ | √ |   |
|                       |            |        |        |                               |           | DIPG1-Midbrain       | I                        | Frozen      |                    |           |             |           |                        | H3.1B K27M (19.32%)              | PIK3R1 splicing (24.85%), CTNNA2 A260S (25.33%), RECQL5 splicing (17.24%) |              | 1 Core Punch         | H3.1B K27M (25%)  | H3.1 K27M | CTNNA2 A260S; PIK3R1 splicing |          |         |           |   |                                      |   |   |   |   |   |
|                       |            |        |        |                               |           | DIPG1-Pons 1         | J                        | Frozen      |                    |           |             |           | H3.1 K27M (52%)        | H3.1B K27M (24.4%)               | PIK3R1 splicing (23.75%), CTNNA2 A260S (27.39%), RECQL5 splicing (21.99%) |              | 1 Core Punch         | H3.1B K27M (34%)  | H3.1 K27M | CTNNA2 A260S; PIK3R1 splicing |          |         |           |   |                                      |   |   |   |   |   |
|                       |            |        |        |                               |           | DIPG1-Pons 2         | J                        | Frozen      |                    |           |             |           |                        | H3.1B K27M (29%)                 | PIK3R1 splicing (29.33%), CTNNA2 A260S (33.04%), RECQL5 splicing (18.02%) |              |                      |                   | H3.1 K27M | CTNNA2 A260S; PIK3R1 splicing |          |         |           |   |                                      |   |   |   |   |   |
|                       |            |        |        |                               |           | DIPG1-Pons 3         | J                        | Frozen      |                    |           |             |           |                        | H3.1B K27M (23.1%)               | PIK3R1 splicing (21.02%), CTNNA2 A260S (22.55%), RECQL5 splicing (16.85%) |              | 1 Core Punch         | H3.1B K27M (23%)  | H3.1 K27M | CTNNA2 A260S; PIK3R1 splicing |          |         |           |   |                                      |   |   |   |   |   |
|                       |            |        |        |                               |           | DIPG1-Pons 4         | J                        | Frozen      |                    |           |             |           | H3.1 K27M (19%)        | H3.1B K27M (18.56%)              | PIK3R1 splicing (21.97%), CTNNA2 A260S (20.6%), RECQL5 splicing (21.14%)  |              | 1 Core Punch         | H3.1B K27M (23%)  | H3.1 K27M | CTNNA2 A260S; PIK3R1 splicing |          |         |           |   |                                      |   |   |   |   |   |
|                       |            |        |        |                               |           | DIPG1-Pons 5         | J                        | FFPE        |                    |           |             |           |                        |                                  |                                                                           |              |                      |                   |           |                               |          |         |           |   |                                      |   | √ | √ | √ | √ |
|                       |            |        |        |                               |           | DIPG1-Pons 6         | J                        | FFPE        |                    |           |             |           |                        |                                  |                                                                           |              |                      |                   |           |                               |          |         |           |   |                                      |   | √ | √ | √ | √ |
|                       |            |        |        |                               |           | DIPG1-Medulla        | K                        | Frozen      |                    |           |             |           | H3.1 K27M (24%)        | H3.1B K27M (25.43%)              | PIK3R1 splicing (25.60%), CTNNA2 A260S (24.21%), RECQL5 splicing (18.95%) |              | 1 Core Punch         | H3.1B K27M (30%)  | H3.1 K27M | CTNNA2 A260S; PIK3R1 splicing |          |         |           |   |                                      |   |   |   |   |   |
| DIPG2-Temporal Lobe 1 | A          | FFPE   |        |                               |           |                      |                          |             | WT                 |           |             |           |                        |                                  | Does not cluster with K27M group                                          |              |                      |                   |           | √                             | √        | √       | √         |   |                                      |   |   |   |   |   |
| DIPG2-Temporal Lobe 2 | A          | FFPE   |        |                               |           |                      |                          | WT          |                    |           |             |           |                        |                                  |                                                                           |              |                      |                   |           |                               |          |         |           |   |                                      |   |   |   |   |   |
| DIPG2-Temporal Lobe 3 | A          | Frozen |        |                               |           |                      |                          |             |                    | WT        |             |           |                        | WT                               | WT                                                                        | no mutations |                      |                   |           |                               |          |         |           |   |                                      |   |   |   |   |   |
| DIPG2-Temporal Lobe 4 | A          | FFPE   |        |                               |           |                      |                          | WT          |                    |           |             |           |                        |                                  |                                                                           |              |                      |                   |           |                               |          |         |           |   |                                      |   |   |   |   |   |
| DIPG2-Frontal Lobe 1  | B          | FFPE   |        |                               |           |                      |                          | WT          |                    |           |             |           |                        | Does not cluster with K27M group |                                                                           |              |                      |                   |           |                               |          |         |           |   |                                      |   |   |   |   |   |
| DIPG2-Frontal Lobe 2  | B          | FFPE   |        |                               |           |                      |                          | WT          |                    |           |             |           |                        | Does not cluster with K27M group |                                                                           |              |                      |                   |           | √                             | √        | √       | √         |   |                                      |   |   |   |   |   |
| DIPG2-Frontal Lobe 3  | B          | Frozen |        |                               |           |                      |                          | WT          |                    | WT        |             |           |                        | WT                               | WT                                                                        | no mutations |                      |                   |           |                               |          |         |           |   |                                      |   |   |   |   |   |
| DIPG2-Parietal Lobe 1 | C          | FFPE   |        |                               |           |                      |                          | WT          |                    |           |             |           |                        |                                  |                                                                           |              |                      |                   |           |                               |          |         |           |   |                                      |   |   |   |   |   |
| DIPG2-Parietal Lobe 2 | C          | FFPE   |        |                               |           |                      |                          | WT          |                    |           |             |           |                        |                                  |                                                                           |              |                      |                   |           | √                             | √        | √       | √         |   |                                      |   |   |   |   |   |
| DIPG2-Parietal Lobe 3 | C          | FFPE   |        |                               |           |                      |                          | WT          |                    |           |             |           |                        |                                  |                                                                           |              |                      |                   |           |                               |          |         |           |   |                                      |   |   |   |   |   |
| DIPG2-Parietal Lobe 4 | C          | Frozen |        |                               |           |                      |                          |             |                    | WT        |             |           |                        |                                  | WT                                                                        | WT           | no mutations         |                   |           |                               |          |         |           |   |                                      |   |   |   |   |   |



|              |            |        |        |              |                |                         |            |        |       |    |                     |                   |                     |              |    |              |                            |    |                  |                  |                  |                                                  |                        |              |              |   |    |              |  |
|--------------|------------|--------|--------|--------------|----------------|-------------------------|------------|--------|-------|----|---------------------|-------------------|---------------------|--------------|----|--------------|----------------------------|----|------------------|------------------|------------------|--------------------------------------------------|------------------------|--------------|--------------|---|----|--------------|--|
| DIPG2 (H3.1) | DIPG (GBM) | Male   | 6y 10m | N/A          | Yes            | DIPG2- Parietal Lobe 5  | C          | Frozen |       |    | WT                  |                   |                     | WT           | WT | no mutations |                            |    |                  |                  |                  |                                                  |                        |              |              |   |    |              |  |
|              |            |        |        |              |                | DIPG2- Occipital Lobe 1 | D          | FFPE   | WT    |    |                     |                   |                     |              |    |              |                            |    |                  |                  |                  |                                                  |                        |              |              |   |    |              |  |
|              |            |        |        |              |                | DIPG2- Occipital Lobe 2 | D          | Frozen |       |    | WT                  |                   |                     |              |    |              |                            | WT | WT               | no mutations     |                  |                                                  |                        |              |              |   |    |              |  |
|              |            |        |        |              |                | DIPG2- Cerebellum 1     | E          | Frozen |       |    | H3.1B K27M (15.49%) |                   |                     |              |    |              |                            |    | H3.1B K27M (16%) | H3.1 K27M        | ACVR1 G328V      |                                                  |                        |              |              |   |    |              |  |
|              |            |        |        |              |                | DIPG2- Cerebellum 2     | E          | Frozen |       |    |                     |                   |                     |              |    |              |                            |    | failed           | WT               | no mutations     |                                                  |                        |              |              |   |    |              |  |
|              |            |        |        |              |                | DIPG2- Cerebellum 3     | E          | Frozen |       |    |                     |                   |                     |              |    |              |                            |    | WT               | WT               | no mutations     |                                                  |                        |              |              |   |    |              |  |
|              |            |        |        |              |                | DIPG2- Cerebellum 4     | E          | Frozen |       |    |                     |                   |                     |              |    |              |                            |    | WT               | WT               | no mutations     |                                                  |                        |              |              |   |    |              |  |
|              |            |        |        |              |                | DIPG2- Cerebellum 5     | E          | FFPE   |       |    | WT                  |                   |                     |              |    |              |                            |    |                  |                  |                  |                                                  |                        | ✓            | ✓            | ✓ | ✓  |              |  |
|              |            |        |        |              |                | DIPG2- Cerebellum 6     | E          | FFPE   |       |    | WT                  |                   |                     |              |    |              |                            |    |                  |                  |                  |                                                  |                        | ✓            | ✓            | ✓ | ✓  |              |  |
|              |            |        |        |              |                | DIPG2- Thalamus         | H          | Frozen |       |    | H3.1 K27M (49%)     | ACVR1 G328V (70%) | H3.1B K27M (45.03%) |              |    |              |                            |    |                  | H3.1B K27M (45%) | H3.1 K27M        | ACVR1 G328V; PIK3CA H1047R; MAX R51Q; PTEN A126S |                        |              |              |   |    |              |  |
|              |            |        |        |              |                | DIPG2-Pons 1            | J          | Frozen |       |    | H3.1 K27M (37%)     | ACVR1 G328V (57%) | H3.1B K27M (33.44%) |              |    |              |                            |    |                  | H3.1B K27M (41%) | H3.1 K27M        | ACVR1 G328V; MAX R51Q                            |                        |              |              |   |    |              |  |
|              |            |        |        |              |                | DIPG2-Pons 2            | J          | Frozen |       |    |                     |                   | H3.1B K27M (37.14%) |              |    |              |                            |    |                  | H3.1B K27M (30%) | H3.1 K27M        | ACVR1 G328V; PIK3CA H1047R                       |                        |              |              |   |    |              |  |
|              |            |        |        |              |                | DIPG2-Pons 3            | J          | Frozen |       |    |                     |                   | H3.1B K27M (33.22%) |              |    |              |                            |    |                  | 1 Core Punch     | H3.1B K27M (39%) | H3.1 K27M                                        | ACVR1 G328V; MAX R51Q; |              |              |   |    |              |  |
|              |            |        |        |              |                | DIPG2-Pons 4            | J          | FFPE   |       |    | H3.1 K27M (49%)     | ACVR1 G328V (70%) |                     |              |    |              |                            |    |                  |                  |                  |                                                  |                        |              | ✓            | ✓ | ✓  | ✓            |  |
|              |            |        |        |              |                | DIPG2-Pons 5            | J          | FFPE   |       |    |                     |                   |                     |              |    |              |                            |    |                  |                  |                  |                                                  |                        |              | ✓            | ✓ | ✓  | ✓            |  |
|              |            |        |        |              |                | DIPG2-Pons 6            | J          | FFPE   |       |    |                     |                   |                     |              |    |              |                            |    |                  |                  |                  |                                                  |                        |              | ✓            | ✓ | ✓  | ✓            |  |
|              |            |        |        |              |                | DIPG2- Medulla          | K          | Frozen |       |    |                     |                   | H3.1B K27M (20.05%) |              |    |              |                            |    |                  | 1 Core Punch     | H3.1B K27M (26%) | H3.1 K27M                                        | ACVR1 G328V; MAX R51Q; |              |              |   |    |              |  |
|              |            |        |        |              |                | DIPG3 (H3.2)            | DIPG (GBM) | Female | 7y 5m | No | Yes                 | DIPG3- Cerebrum   | N/A                 | Frozen       |    |              | WT                         |    |                  |                  | 1 Core Punch     |                                                  | WT                     | no mutations |              |   |    |              |  |
|              |            |        |        |              |                |                         |            |        |       |    |                     | DIPG3- Cerebellum | E                   | Frozen       |    |              | WT                         |    |                  |                  |                  |                                                  |                        |              | 1 Core Punch |   | WT | no mutations |  |
| DIPG3-Pons 1 | J          | Frozen |        |              | H3.2 K27M (8%) |                         |            |        |       |    |                     | ACVR1 G328V (47%) |                     |              |    |              |                            |    | 1 Core Punch     |                  | H3.2 K27M        | ACVR1 G328V                                      |                        |              |              |   |    |              |  |
| DIPG3-Pons 2 | J          | Frozen |        |              | H3.2 K27M (5%) | ACVR1 G328V (57%)       |            |        |       |    |                     |                   |                     | 1 Core Punch |    | H3.2 K27M    | ACVR1 G328V; PIK3CA H1047R |    |                  |                  |                  |                                                  |                        |              |              |   |    |              |  |
| DIPG4 (H3.3) | DIPG (GBM) | Female | 5y 6m  | Capecitabine | Yes            | DIPG4- Frontal Lobe 1   | B          | Frozen |       |    | WT                  |                   |                     |              |    |              | WT                         | WT | no mutations     |                  |                  |                                                  |                        |              |              |   |    |              |  |
|              |            |        |        |              |                | DIPG4- Frontal Lobe 2   | B          | FFPE   |       |    |                     |                   |                     |              |    |              |                            |    |                  |                  |                  |                                                  |                        | ✓            | ✓            | ✓ | ✓  |              |  |
|              |            |        |        |              |                | DIPG4- Cerebellum       | E          | FFPE   |       |    |                     |                   |                     |              |    |              |                            |    |                  |                  |                  |                                                  |                        |              | ✓            | ✓ | ✓  | ✓            |  |
|              |            |        |        |              |                | DIPG4-Pons 1            | J          | Frozen |       |    |                     |                   | H3.3 K27M (46.47%)  |              |    |              |                            |    |                  | H3.3 K27M (44%)  | H3.3 K27M        | TP53 C3F; ACVR1 R206H                            |                        |              |              |   |    |              |  |
|              |            |        |        |              |                | DIPG4-Pons 2            | J          | Frozen |       |    | H3.3 K27M (45%)     | ACVR1 R206H (30%) | H3.3 K27M (50.29%)  |              |    |              |                            |    |                  |                  |                  |                                                  |                        |              |              |   |    |              |  |
| DIPG4-Pons 3 | J          | FFPE   |        |              |                |                         |            |        |       |    |                     |                   |                     |              |    |              |                            |    |                  | ✓                | ✓                | ✓                                                | ✓                      |              |              |   |    |              |  |

cerebral cortex & cerebellum





DIPG7 (H3.3)

DIPG (GBM)

Female

10y 8m

SAHA

Yes

|                               |   |        |    |                    |  |                       |                                                                 |  |                                        |                   |                    |           |              |  |   |   |   |   |
|-------------------------------|---|--------|----|--------------------|--|-----------------------|-----------------------------------------------------------------|--|----------------------------------------|-------------------|--------------------|-----------|--------------|--|---|---|---|---|
| DIPG7-<br>Frontal Lobe<br>2   | B | FFPE   |    | H3.3 K27M<br>(26%) |  |                       |                                                                 |  | Clusters with<br>K27M group            |                   |                    |           |              |  | √ | √ | √ | √ |
| DIPG7-<br>Parietal Lobe<br>1  | C | Frozen |    | WT                 |  | WT                    |                                                                 |  |                                        | 1 core<br>punch   | WT                 | WT        | no mutations |  |   |   |   |   |
| DIPG7-<br>Parietal Lobe<br>2  | C | FFPE   | WT |                    |  |                       |                                                                 |  | Does not<br>cluster with<br>K27M group |                   |                    |           |              |  | √ | √ | √ | √ |
| DIPG7-<br>Parietal Lobe<br>3  | C | FFPE   | WT |                    |  |                       |                                                                 |  | Does not<br>cluster with<br>K27M group |                   |                    |           |              |  | √ | √ | √ | √ |
| DIPG7-<br>Occipital<br>Lobe 1 | D | FFPE   |    | WT                 |  |                       |                                                                 |  |                                        |                   |                    |           |              |  | √ | √ | √ | √ |
| DIPG7-<br>Occipital<br>Lobe 2 | D | FFPE   |    | WT                 |  |                       |                                                                 |  |                                        |                   |                    |           |              |  | √ | √ | √ | √ |
| DIPG7-<br>Cerebellum<br>1     | E | Frozen |    |                    |  | H3.3 K27M<br>(28.5%)  | TP53 R43H (20.12%), PBRM1 splicing<br>(0.35%)                   |  |                                        |                   | H3.3 K27M<br>(26%) | H3.3 K27M | TP53 R43H    |  |   |   |   |   |
| DIPG7-<br>Cerebellum<br>2     | E | Frozen |    |                    |  |                       |                                                                 |  |                                        |                   | WT                 | WT        | no mutations |  |   |   |   |   |
| DIPG7-<br>Cerebellum<br>3     | E | FFPE   |    | WT                 |  |                       |                                                                 |  | Does not<br>cluster with<br>K27M group |                   |                    |           |              |  | √ | √ | √ | √ |
| DIPG7-<br>Cerebellum<br>4     | E | FFPE   |    |                    |  | WT                    |                                                                 |  | Does not<br>cluster with<br>K27M group |                   |                    |           |              |  | √ | √ | √ | √ |
| DIPG7-<br>Ventricle 1         | F | FFPE   |    | H3.3 K27M<br>(64%) |  |                       |                                                                 |  | Clusters with<br>K27M group            |                   |                    |           |              |  | √ | √ | √ | √ |
| DIPG7-<br>Ventricle 2         | F | FFPE   |    | H3.3 K27M<br>(48%) |  |                       |                                                                 |  | Clusters with<br>K27M group            |                   |                    |           |              |  | √ | √ | √ | √ |
| DIPG7-<br>Hippocampu<br>s 1   | G | FFPE   |    | H3.3 K27M<br>(59%) |  |                       |                                                                 |  | Clusters with<br>K27M group            |                   |                    |           |              |  | √ | √ | √ | √ |
| DIPG7-<br>Hippocampu<br>s 2   | G | FFPE   |    | WT                 |  |                       |                                                                 |  |                                        |                   |                    |           |              |  | √ | √ | √ | √ |
| DIPG7-<br>Thalamus 1          | H | FFPE   |    | WT                 |  |                       |                                                                 |  |                                        |                   |                    |           |              |  | √ | √ | √ | √ |
| DIPG7-<br>Thalamus 2          | H | FFPE   |    | H3.3 K27M<br>(52%) |  |                       |                                                                 |  | Clusters with<br>K27M group            |                   |                    |           |              |  | √ | √ | √ | √ |
| DIPG7-Pons<br>1               | J | Frozen |    | H3.3 K27M<br>(26%) |  | H3.3 K27M<br>(66.75%) | TP53 R43H (67.55%), PBRM1 splicing<br>(0.23%)                   |  |                                        |                   | H3.3 K27M<br>(64%) | H3.3 K27M | TP53 R43H    |  |   |   |   |   |
| DIPG7-Pons<br>2               | J | Frozen |    |                    |  | H3.3 K27M<br>(9.74%)  | TP53 R43H (6.88%), PBRM1 splicing<br>(0.22%)                    |  |                                        |                   | H3.3 K27M<br>(10%) | H3.3 K27M | TP53 R43H    |  |   |   |   |   |
| DIPG7-Pons<br>3               | J | Frozen |    |                    |  | H3.3 K27M<br>(56.87%) | TP53 R43H (87.04%), PBRM1 splicing<br>(0.51%)                   |  |                                        | 2 Core<br>Punches | H3.3 K27M<br>(58%) | H3.3 K27M | TP53 R43H    |  |   |   |   |   |
| DIPG7-Pons<br>4               | J | FFPE   |    | N/A                |  |                       |                                                                 |  | Clusters with<br>K27M group            |                   |                    |           |              |  | √ | √ | √ | √ |
| DIPG7-Pons<br>5               | J | Frozen |    |                    |  | WT                    |                                                                 |  |                                        | 2 Core<br>Punches | WT                 | WT        | no mutations |  |   |   |   |   |
| DIPG7-Pons<br>6               | J | FFPE   |    |                    |  |                       |                                                                 |  |                                        |                   |                    |           |              |  | √ | √ | √ | √ |
| DIPG7-<br>Medulla             | K | Frozen |    |                    |  | H3.3 K27M<br>(20.87%) | TP53 R43H (6.57%), PBRM1 splicing<br>(0.36%)                    |  |                                        |                   | H3.3 K27M<br>(21%) | H3.3 K27M | TP53 R43H    |  |   |   |   |   |
| DIPG8-<br>Temporal<br>Lobe 1  | A | FFPE   | WT |                    |  |                       |                                                                 |  |                                        |                   |                    |           |              |  |   |   |   |   |
| DIPG8-<br>Temporal<br>Lobe 2  | A | FFPE   | WT |                    |  |                       |                                                                 |  |                                        |                   |                    |           |              |  |   |   |   |   |
| DIPG8-<br>Frontal Lobe<br>1   | B | Frozen |    | WT                 |  | H3.3 K27M<br>(5.11%)  | TP53 E162X (11.6%), HOXD3 H431Q<br>(4.48%), PTPN11 A72V (0.09%) |  |                                        |                   | H3.3 K27M<br>(9%)  | H3.3 K27M | TP53 E162X   |  |   |   |   |   |
| DIPG8-<br>Frontal Lobe<br>2   | B | FFPE   | WT |                    |  |                       |                                                                 |  |                                        |                   |                    |           |              |  | √ | √ | √ | √ |
| DIPG8-<br>Frontal Lobe<br>3   | B | FFPE   | WT |                    |  |                       |                                                                 |  |                                        |                   |                    |           |              |  | √ | √ | √ | √ |
| DIPG8-<br>Parietal Lobe<br>1  | C | FFPE   | WT |                    |  |                       |                                                                 |  |                                        |                   |                    |           |              |  |   |   |   |   |
| DIPG8-<br>Parietal Lobe<br>2  | C | Frozen |    |                    |  | WT                    |                                                                 |  |                                        |                   | WT                 | WT        | no mutations |  |   |   |   |   |
| DIPG8-<br>Occipital<br>Lobe   | D | Frozen |    |                    |  | WT                    |                                                                 |  |                                        |                   | H3.3 K27M<br>(21%) | WT        | TP53 (3.13%) |  |   |   |   |   |

cerebral  
cortex &  
cerebellum  
is FFPE

DIPG8 (H3.3)

DIPG (GBM)

Male

5y

Temozolomide, Avastin, SAHA

Yes

|                        |   |        |                 |                 |  |                    |                                                                |                                  |  |                 |           |              |   |   |   |   |  |
|------------------------|---|--------|-----------------|-----------------|--|--------------------|----------------------------------------------------------------|----------------------------------|--|-----------------|-----------|--------------|---|---|---|---|--|
| DIPG8-Cerebellum 1     | E | Frozen |                 |                 |  | H3.3 K27M (17.96%) | TP53 E162X (22.17%), HOXD3 H431Q (4.27%), PTPN11 A72V (0.08%)  |                                  |  | H3.3 K27M (24%) | H3.3 K27M | TP53 E162X   |   |   |   |   |  |
| DIPG8-Cerebellum 2     | E | Frozen |                 |                 |  | WT                 |                                                                |                                  |  | WT              | WT        | TP53 (2.03%) |   |   |   |   |  |
| DIPG8-Cerebellum 3     | E | FFPE   | H3.3 K27M (6%)  |                 |  |                    |                                                                |                                  |  |                 |           |              | ✓ | ✓ | ✓ | ✓ |  |
| DIPG8-Cerebellum 4     | E | FFPE   | H3.3 K27M (8%)  |                 |  |                    |                                                                |                                  |  |                 |           |              | ✓ | ✓ | ✓ | ✓ |  |
| DIPG8-Ventricle        | F | Frozen |                 |                 |  | WT                 |                                                                |                                  |  | WT              | WT        | no mutations |   |   |   |   |  |
| DIPG8-Hippocampus 1    | G | FFPE   | WT              |                 |  | WT                 |                                                                |                                  |  | WT              | failed    | failed       |   |   |   |   |  |
| DIPG8-Hippocampus 2    | G | FFPE   | WT              |                 |  |                    |                                                                |                                  |  |                 |           |              |   |   |   |   |  |
| DIPG8-Thalamus 1       | H | FFPE   | WT              |                 |  |                    |                                                                |                                  |  |                 |           |              | ✓ | ✓ | ✓ | ✓ |  |
| DIPG8-Thalamus 2       | H | FFPE   | H3.3 K27M (4%)  |                 |  |                    |                                                                |                                  |  |                 |           |              | ✓ | ✓ | ✓ | ✓ |  |
| DIPG8-Midbrain         | I | Frozen |                 |                 |  | H3.3 K27M (41.66%) | TP53 E162X (77.78%), HOXD3 H431Q (46.62%), PTPN11 A72V (0.09%) |                                  |  | H3.3 K27M (16%) | H3.3 K27M | TP53 E162X   |   |   |   |   |  |
| DIPG8-Pons 1           | J | Frozen |                 |                 |  | H3.3 K27M (62.5%)  | TP53 E162X (91.58%), HOXD3 H431Q (49.78%), PTPN11 A72V (0.01%) |                                  |  | H3.3 K27M (71%) | H3.3 K27M | TP53 E162X   |   |   |   |   |  |
| DIPG8-Pons 2           | J | Frozen |                 |                 |  | H3.3 K27M (44.42%) | TP53 E162X (69.52%), HOXD3 H431Q (25.18%), PTPN11 A72V (0.14%) |                                  |  | H3.3 K27M (21%) | H3.3 K27M | TP53 E162X   |   |   |   |   |  |
| DIPG8-Pons 3           | J | FFPE   | H3.3 K27M (12%) |                 |  |                    |                                                                |                                  |  |                 |           |              | ✓ | ✓ | ✓ | ✓ |  |
| DIPG8-Pons 4           | J | FFPE   | H3.3 K27M (17%) |                 |  |                    |                                                                |                                  |  |                 |           |              | ✓ | ✓ | ✓ | ✓ |  |
| DIPG8-Pons 5           | J | FFPE   | H3.3 K27M (13%) |                 |  |                    |                                                                |                                  |  |                 |           |              | ✓ | ✓ | ✓ | ✓ |  |
| DIPG8-Medulla 1        | K | Frozen |                 | H3.3 K27M (48%) |  | H3.3 K27M (47.33%) | TP53 E162X (58.07%), HOXD3 H431Q (28.14%), PTPN11 A72V (0.33%) |                                  |  | H3.3 K27M (48%) | H3.3 K27M | TP53 E162X   |   |   |   |   |  |
| DIPG8-Medulla 2        | K | Frozen |                 |                 |  | H3.3 K27M (30.03%) | TP53 E162X (10.27%), HOXD3 H431Q (7.25%), PTPN11 A72V (17.68%) |                                  |  | H3.3 K27M (34%) | H3.3 K27M | TP53 E162X   |   |   |   |   |  |
| DIPG8-Medulla 3        | K | Frozen |                 |                 |  | H3.3 K27M (55.43%) | TP53 E162X (85.62%), HOXD3 H431Q (39.88%), PTPN11 A72V (0.15%) |                                  |  | H3.3 K27M (57%) | H3.3 K27M | TP53 E162X   |   |   |   |   |  |
| DIPG9-Temporal Lobe 1  | A | FFPE   | WT              |                 |  |                    |                                                                |                                  |  |                 |           |              |   |   |   |   |  |
| DIPG9-Temporal Lobe 2  | A | FFPE   | WT              |                 |  |                    |                                                                | Does not cluster with K27M group |  |                 |           |              |   |   |   |   |  |
| DIPG9-Temporal Lobe 3  | A | Frozen |                 |                 |  |                    |                                                                |                                  |  | WT              | WT        | no mutations |   |   |   |   |  |
| DIPG9-Frontal Lobe 1   | B | FFPE   | WT              |                 |  |                    |                                                                |                                  |  |                 |           |              | ✓ | ✓ | ✓ | ✓ |  |
| DIPG9-Frontal Lobe 2   | B | FFPE   | WT              |                 |  |                    |                                                                | Does not cluster with K27M group |  |                 |           |              |   |   |   |   |  |
| DIPG9-Frontal Lobe 3   | B | Frozen |                 | WT              |  | WT                 |                                                                |                                  |  | WT              | WT        | no mutations |   |   |   |   |  |
| DIPG9-Parietal Lobe 1  | C | FFPE   | WT              |                 |  |                    |                                                                | Does not cluster with K27M group |  |                 |           |              |   |   |   |   |  |
| DIPG9-Parietal Lobe 2  | C | FFPE   | WT              |                 |  |                    |                                                                | Does not cluster with K27M group |  |                 |           |              |   |   |   |   |  |
| DIPG9-Parietal Lobe 3  | C | Frozen |                 |                 |  | WT                 |                                                                |                                  |  | WT              | WT        | no mutations |   |   |   |   |  |
| DIPG9-Occipital Lobe 1 | D | FFPE   | WT              |                 |  |                    |                                                                | Does not cluster with K27M group |  |                 |           |              |   |   |   |   |  |
| DIPG9-Occipital Lobe 2 | D | FFPE   | WT              |                 |  |                    |                                                                | Does not cluster with K27M group |  |                 |           |              |   |   |   |   |  |

ABT888  
(Naloxone)



|              |            |      |       |                                                            |     |                        |   |        |                   |                 |                    |    |                                            |                                  |              |                 |              |                          |   |   |   |   |   |
|--------------|------------|------|-------|------------------------------------------------------------|-----|------------------------|---|--------|-------------------|-----------------|--------------------|----|--------------------------------------------|----------------------------------|--------------|-----------------|--------------|--------------------------|---|---|---|---|---|
| DIPG9 (H3.3) | DIPG (GBM) | Male | 9y 3m | 1 venperay<br>Temozolomi<br>de in<br>maintenanc<br>e phase | Yes | DIPG9-Occipital Lobe 3 | D | Frozen |                   |                 |                    | WT |                                            |                                  | WT           | WT              | no mutations |                          |   |   |   |   |   |
|              |            |      |       |                                                            |     | DIPG9-Cerebellum 1     | E | FFPE   |                   | WT              |                    |    |                                            | Does not cluster with K27M group |              |                 |              |                          | √ | √ | √ | √ |   |
|              |            |      |       |                                                            |     | DIPG9-Cerebellum 2     | E | FFPE   |                   | WT              |                    |    |                                            | Does not cluster with K27M group |              |                 |              |                          | √ | √ | √ | √ |   |
|              |            |      |       |                                                            |     | DIPG9-Cerebellum 3     | E | Frozen |                   |                 |                    | WT |                                            |                                  | 1 Core Punch | failed          | WT           | no mutations             |   |   |   |   |   |
|              |            |      |       |                                                            |     | DIPG9-Ventricle        | F | Frozen |                   |                 | H3.3 K27M (36.49%) |    | ATRX V1514D (37.84%), PPM1D E525X (24.68%) |                                  |              | H3.3 K27M (32%) | H3.3 K27M    | PPM1D E525X; ATRX V1514D |   |   |   |   |   |
|              |            |      |       |                                                            |     | DIPG9-Hippocampus 1    | G | FFPE   | WT                |                 |                    |    |                                            | Does not cluster with K27M group |              |                 |              |                          |   |   |   |   |   |
|              |            |      |       |                                                            |     | DIPG9-Hippocampus 2    | G | FFPE   | WT                |                 |                    |    |                                            | Does not cluster with K27M group |              |                 |              |                          |   |   |   |   |   |
|              |            |      |       |                                                            |     | DIPG9-Thalamus 1       | H | FFPE   | H3.3 K27M (11.5%) |                 |                    |    |                                            | Does not cluster with K27M group |              |                 |              |                          |   | √ | √ | √ | √ |
|              |            |      |       |                                                            |     | DIPG9-Thalamus 2       | H | FFPE   | WT                |                 |                    |    |                                            | Does not cluster with K27M group |              |                 |              |                          |   |   |   |   |   |
|              |            |      |       |                                                            |     | DIPG9-Midbrain         | I | Frozen |                   |                 | H3.3 K27M (48.57%) |    | ATRX V1514D (62.76%), PPM1D E525X (48.87%) |                                  | 1 Core Punch | H3.3 K27M (49%) | H3.3 K27M    | PPM1D E525X; ATRX V1514D |   |   |   |   |   |
|              |            |      |       |                                                            |     | DIPG9-Pons 1           | J | Frozen |                   | H3.3 K27M (26%) | H3.3 K27M (31.42%) |    | ATRX V1514D (39.03%), PPM1D E525X (22.06%) |                                  |              | H3.3 K27M (24%) | H3.3 K27M    | PPM1D E525X; ATRX V1514D |   |   |   |   |   |
|              |            |      |       |                                                            |     | DIPG9-Pons 2           | J | FFPE   |                   |                 |                    |    |                                            |                                  |              |                 |              |                          |   | √ | √ | √ | √ |
|              |            |      |       |                                                            |     | DIPG9-Medulla 1        | K | Frozen |                   |                 | H3.3 K27M (46.6%)  |    | ATRX V1514D (64.19%), PPM1D E525X (30.9%)  |                                  |              | H3.3 K27M (4%)  | H3.3 K27M    | PPM1D E525X              |   |   |   |   |   |
|              |            |      |       |                                                            |     | DIPG9-Medulla 2        | K | FFPE   | H3.3 K27M (59%)   |                 |                    |    |                                            | Clusters with K27M group         |              |                 |              |                          |   | √ | √ | √ | √ |

**Supplementary Table 1:** Clinical and molecular data from 134 punch cores taken from autopsy brains of 9 Diffuse Intrinsic Pontine Glioma (DIPG) patients analyzed in this study. Neuroanatomical locations: A = temporal lobe, B = frontal lobe, C = parietal lobe, D = occipital lobe, E = cerebellum, F = lateral ventricles, G = hippocampus, H = thalamus, I = midbrain, J = pons, K = medulla

**Supplementary Table 2:** Sample distribution from 9 DIPG patient samples used in this study

| Patient ID     | Total # of samples analyzed (IHC and molecular) | MOLECULAR ANALYSES # |             |                 | IHC only # | IHC and molecular |          |
|----------------|-------------------------------------------------|----------------------|-------------|-----------------|------------|-------------------|----------|
|                |                                                 | Total #              | Brainstem # | Non brainstem # |            | Tumor #           | Normal # |
| DIPG1          | 16                                              | 8                    | 6           | 2               | 8          | 13                | 3        |
| DIPG2          | 28                                              | 26                   | 5           | 21              | 2          | 9                 | 19       |
| DIPG3          | 4                                               | 4                    | 2           | 2               | 0          | 2                 | 2        |
| DIPG4          | 13                                              | 6                    | 5           | 1               | 7          | 8                 | 5        |
| DIPG5          | 9                                               | 6                    | 4           | 2               | 3          | 6                 | 3        |
| DIPG6          | 11                                              | 9                    | 7           | 2               | 2          | 8                 | 3        |
| DIPG7          | 26                                              | 25                   | 6           | 19              | 1          | 12                | 14       |
| DIPG8          | 26                                              | 26                   | 9           | 17              | 0          | 16                | 10       |
| DIPG9          | 25                                              | 24                   | 4           | 20              | 1          | 7                 | 18       |
| <b>TOTAL</b>   | 158*                                            | 134**                | 48          | 86              | 24***      | 81                | 77       |
| <b>AVERAGE</b> | 18                                              | 15                   | 5           | 10              | 3          | 9                 | 9        |

**Supplementary Table 2:** Sample distribution and neuroanatomical locations from 9 DIPG patients (DIPG1-DIPG9) for all methods used in this study. \*Number includes all samples used in this study. \*\*Number excludes samples with only IHC data. \*\*\*Number of samples with only IHC data.



**Supplementary Table 3:** Tumor extension assessed by molecular analysis

| Patient ID                             | Pons  | Medulla | Midbrain | Cerebellum | Thalamus | Lateral Ventricles | Hippo-campus | Frontal Lobe | Occipital Lobe | Other Cerebral location |
|----------------------------------------|-------|---------|----------|------------|----------|--------------------|--------------|--------------|----------------|-------------------------|
| DIPG1                                  | (4/4) | (1/1)   | (1/1)    | (1/1)      |          |                    |              | (0/1)        |                |                         |
| DIPG2                                  | (4/4) | (1/1)   |          | (1/6)      | (1/1)    |                    |              | (0/3)        | (0/2)          |                         |
| DIPG3                                  | (2/2) |         |          | (0/1)      |          |                    |              |              | (0/1)          | (0/1)                   |
| DIPG4                                  | (5/5) |         |          |            |          |                    |              | (0/1)        |                |                         |
| DIPG5                                  | (1/1) | (1/1)   | (1/2)    | (0/2)      |          |                    |              |              |                |                         |
| DIPG6                                  | (5/6) |         | (1/1)    | (0/1)      |          |                    |              | (0/1)        |                |                         |
| DIPG7                                  | (3/4) | (1/1)   |          | (1/4)      | (1/2)    | (2/2)              | (1/2)        | (1/2)        |                |                         |
| DIPG8                                  | (5/5) | (3/3)   | (1/1)    | (3/4)      | (1/2)    | (0/1)              | (0/2)        | (1/3)        | (1/1)          |                         |
| DIPG9                                  | (1/1) | (2/2)   | (1/1)    | (0/3)      | (1/2)    | (1/1)              | (0/2)        | (0/3)        | (0/3)          |                         |
| <b># patients with tumor extension</b> | 9     | 6       | 5        | 4          | 4        | 2                  | 1            | 2            | 1              |                         |
| <b>Total # patients analyzed</b>       | 9     | 6       | 5        | 8          | 4        | 3                  | 3            | 7            | 4              |                         |
| <b>Percentage</b>                      | 100%  | 100%    | 100%     | 50%        | 100%     | 67%                | 33%          | 29%          | 25%            |                         |
| <b># samples with tumor extension</b>  | 31    | 9       | 5        | 6          | 4        | 3                  | 1            | 2            | 1              |                         |
| <b>Total # samples analyzed</b>        | 33    | 9       | 6        | 22         | 6        | 4                  | 5            | 13           | 6              |                         |
| <b>Percentage</b>                      | 94%   | 100%    | 83%      | 27%        | 67%      | 75%                | 20%          | 15%          | 17%            |                         |

**Supplementary Table 3:** Tumor extension in different neuroanatomical locations tested by different molecular analyses (WES, MiSeq, ddPCR) for 9 Diffuse Intrinsic Pontine Glioma brain samples (DIPG1-DIPG9) analyzed in this study. Numbers in parentheses:(number of samples with H3-K27M/number of samples analyzed by molecular methods). **Cells in bold indicate samples with extension detected by molecular analysis.**

**Supplementary Table 4:** Whole Exome Sequencing data for 67 samples (9 Patients; DIPG1-DIPG9)

|       | K27M Marker     | Accompanying (potential) driver mutations |                 |              |               |
|-------|-----------------|-------------------------------------------|-----------------|--------------|---------------|
| DIPG1 | HIST1H3B_p.K27M | PIK3R1_splicing                           | CTNNA2_p.A260S  |              |               |
| DIPG2 | HIST1H3B_p.K27M | ACVR1_p.G328V                             | PIK3CA_p.H1047R | MAX_p.R51Q   | PTEN_p.A126S  |
| DIPG3 | HIST2H3C_p.K27M | ACVR1_p.G328V                             | PIK3CA_p.H1047R |              |               |
| DIPG4 | H3F3A_p.K27M    | ACVR1_p.R206H                             | TP53p.C3F       |              |               |
| DIPG5 | H3F3A_p.K27M    | TP53p.A175fs                              | PPM1D_p.W427X   | ATRXp.D94fs  |               |
| DIPG6 | H3F3A_p.K27M    | TP53_p.G113D                              | PIK3CA_p.H1047R | ATRXsplicing | OLIG2p.P215fs |
| DIPG7 | H3F3A_p.K27M    | TP53_p.R43H                               |                 |              |               |
| DIPG8 | H3F3A_p.K27M    | TP53_p.E162X                              | TP53p.P58fs     |              |               |
| DIPG9 | H3F3A_p.K27M    | PPM1D_p.E525X                             | ATRX_p.V1514D   |              |               |

**Supplementary Table 4:** Summary of Whole Exome Sequencing data for 67 samples from 9 Diffuse Intrinsic Pontine Gliomas patients (DIPG1-DIPG9) demonstrating the main driver mutations as well as the accessory mutations.



## Supplementary Table 5 Whole Exome Sequencing-based CNV calling

|                                 | Patient ID |          | H3.1   |        |        |        |         |                |        |        |        |         |              |              | H3.2         |              |              | H3.3             |                  |                  |          |                |        |        |        |            |            |                |        |         |          |          |          |         |              |                  |                  |                  |                |          |        |  |
|---------------------------------|------------|----------|--------|--------|--------|--------|---------|----------------|--------|--------|--------|---------|--------------|--------------|--------------|--------------|--------------|------------------|------------------|------------------|----------|----------------|--------|--------|--------|------------|------------|----------------|--------|---------|----------|----------|----------|---------|--------------|------------------|------------------|------------------|----------------|----------|--------|--|
|                                 |            |          | DIPG 1 |        |        |        | DIPG 2  |                |        |        | DIPG 3 | DIPG 4  | DIPG 5       | DIPG 6       |              |              | DIPG 7       |                  |                  | DIPG 8           |          |                | DIPG 9 |        |        |            |            |                |        |         |          |          |          |         |              |                  |                  |                  |                |          |        |  |
|                                 | Age        | Gender   | 21y 2m |        | 10m    |        |         |                | 7y 5m  | 4y 6m  | 5y     | 10y 8m  |              |              | 5y           |              |              | 3y 3m            |                  |                  |          |                |        |        |        |            |            |                |        |         |          |          |          |         |              |                  |                  |                  |                |          |        |  |
|                                 | Male       | Female   | Male   | Male   | Female | Female | Female  | Male           | Female | Male   | Male   | Female  | Female       | Female       | Male         | Male         | Female       | Male             | Male             | Male             |          |                |        |        |        |            |            |                |        |         |          |          |          |         |              |                  |                  |                  |                |          |        |  |
|                                 |            | Midbrain | Pons 1 | Pons 2 | Pons 3 | Pons 4 | Medulla | Frontal Lobe 1 | Pons 1 | Pons 2 | Pons 3 | Medulla | Cerebellum 1 | Cerebellum 2 | Cerebellum 3 | Cerebellum 4 | Cerebellum 5 | Occipital Lobe 1 | Occipital Lobe 2 | Occipital Lobe 3 | Thalamus | Frontal Lobe 3 | Pons 2 | Pons 1 | Pons 2 | Cerebellum | Cerebellum | Frontal Lobe 1 | Pons 1 | Medulla | Midbrain | Midbrain | Midbrain | Medulla | Cerebellum 3 | Occipital Lobe 3 | Occipital Lobe 3 | Occipital Lobe 3 | Frontal Lobe 3 | Venticle | Pons 1 |  |
| CNV<br>(Complete Arm Gain/Loss) | 1p         |          |        |        |        |        |         |                |        |        |        |         |              |              |              |              |              |                  |                  |                  |          |                |        |        |        |            |            |                |        |         |          |          |          |         |              |                  |                  |                  |                |          |        |  |
|                                 | 1q         |          |        |        |        |        |         |                |        |        |        |         |              |              |              |              |              |                  |                  |                  |          |                |        |        |        |            |            |                |        |         |          |          |          |         |              |                  |                  |                  |                |          |        |  |
|                                 | 2p         |          |        |        |        |        |         |                |        |        |        |         |              |              |              |              |              |                  |                  |                  |          |                |        |        |        |            |            |                |        |         |          |          |          |         |              |                  |                  |                  |                |          |        |  |
|                                 | 2q         |          |        |        |        |        |         |                |        |        |        |         |              |              |              |              |              |                  |                  |                  |          |                |        |        |        |            |            |                |        |         |          |          |          |         |              |                  |                  |                  |                |          |        |  |
|                                 | 3p         |          |        |        |        |        |         |                |        |        |        |         |              |              |              |              |              |                  |                  |                  |          |                |        |        |        |            |            |                |        |         |          |          |          |         |              |                  |                  |                  |                |          |        |  |
|                                 | 4p         |          |        |        |        |        |         |                |        |        |        |         |              |              |              |              |              |                  |                  |                  |          |                |        |        |        |            |            |                |        |         |          |          |          |         |              |                  |                  |                  |                |          |        |  |
|                                 | 4q         |          |        |        |        |        |         |                |        |        |        |         |              |              |              |              |              |                  |                  |                  |          |                |        |        |        |            |            |                |        |         |          |          |          |         |              |                  |                  |                  |                |          |        |  |
|                                 | 5p         |          |        |        |        |        |         |                |        |        |        |         |              |              |              |              |              |                  |                  |                  |          |                |        |        |        |            |            |                |        |         |          |          |          |         |              |                  |                  |                  |                |          |        |  |
|                                 | 5q         |          |        |        |        |        |         |                |        |        |        |         |              |              |              |              |              |                  |                  |                  |          |                |        |        |        |            |            |                |        |         |          |          |          |         |              |                  |                  |                  |                |          |        |  |
|                                 | 6p         |          |        |        |        |        |         |                |        |        |        |         |              |              |              |              |              |                  |                  |                  |          |                |        |        |        |            |            |                |        |         |          |          |          |         |              |                  |                  |                  |                |          |        |  |
|                                 | 6q         |          |        |        |        |        |         |                |        |        |        |         |              |              |              |              |              |                  |                  |                  |          |                |        |        |        |            |            |                |        |         |          |          |          |         |              |                  |                  |                  |                |          |        |  |
|                                 | 9p         |          |        |        |        |        |         |                |        |        |        |         |              |              |              |              |              |                  |                  |                  |          |                |        |        |        |            |            |                |        |         |          |          |          |         |              |                  |                  |                  |                |          |        |  |
|                                 | 9q         |          |        |        |        |        |         |                |        |        |        |         |              |              |              |              |              |                  |                  |                  |          |                |        |        |        |            |            |                |        |         |          |          |          |         |              |                  |                  |                  |                |          |        |  |
|                                 | 10p        |          |        |        |        |        |         |                |        |        |        |         |              |              |              |              |              |                  |                  |                  |          |                |        |        |        |            |            |                |        |         |          |          |          |         |              |                  |                  |                  |                |          |        |  |
|                                 | 10q        |          |        |        |        |        |         |                |        |        |        |         |              |              |              |              |              |                  |                  |                  |          |                |        |        |        |            |            |                |        |         |          |          |          |         |              |                  |                  |                  |                |          |        |  |
|                                 | 11q        |          |        |        |        |        |         |                |        |        |        |         |              |              |              |              |              |                  |                  |                  |          |                |        |        |        |            |            |                |        |         |          |          |          |         |              |                  |                  |                  |                |          |        |  |
|                                 | 12p        |          |        |        |        |        |         |                |        |        |        |         |              |              |              |              |              |                  |                  |                  |          |                |        |        |        |            |            |                |        |         |          |          |          |         |              |                  |                  |                  |                |          |        |  |
|                                 | 12q        |          |        |        |        |        |         |                |        |        |        |         |              |              |              |              |              |                  |                  |                  |          |                |        |        |        |            |            |                |        |         |          |          |          |         |              |                  |                  |                  |                |          |        |  |
|                                 | 13q        |          |        |        |        |        |         |                |        |        |        |         |              |              |              |              |              |                  |                  |                  |          |                |        |        |        |            |            |                |        |         |          |          |          |         |              |                  |                  |                  |                |          |        |  |
|                                 | 14q        |          |        |        |        |        |         |                |        |        |        |         |              |              |              |              |              |                  |                  |                  |          |                |        |        |        |            |            |                |        |         |          |          |          |         |              |                  |                  |                  |                |          |        |  |
|                                 | 15q        |          |        |        |        |        |         |                |        |        |        |         |              |              |              |              |              |                  |                  |                  |          |                |        |        |        |            |            |                |        |         |          |          |          |         |              |                  |                  |                  |                |          |        |  |
| 16p                             |            |          |        |        |        |        |         |                |        |        |        |         |              |              |              |              |              |                  |                  |                  |          |                |        |        |        |            |            |                |        |         |          |          |          |         |              |                  |                  |                  |                |          |        |  |
| 16q                             |            |          |        |        |        |        |         |                |        |        |        |         |              |              |              |              |              |                  |                  |                  |          |                |        |        |        |            |            |                |        |         |          |          |          |         |              |                  |                  |                  |                |          |        |  |
| 17p                             |            |          |        |        |        |        |         |                |        |        |        |         |              |              |              |              |              |                  |                  |                  |          |                |        |        |        |            |            |                |        |         |          |          |          |         |              |                  |                  |                  |                |          |        |  |
| 17q                             |            |          |        |        |        |        |         |                |        |        |        |         |              |              |              |              |              |                  |                  |                  |          |                |        |        |        |            |            |                |        |         |          |          |          |         |              |                  |                  |                  |                |          |        |  |
| 18p                             |            |          |        |        |        |        |         |                |        |        |        |         |              |              |              |              |              |                  |                  |                  |          |                |        |        |        |            |            |                |        |         |          |          |          |         |              |                  |                  |                  |                |          |        |  |
| 18q                             |            |          |        |        |        |        |         |                |        |        |        |         |              |              |              |              |              |                  |                  |                  |          |                |        |        |        |            |            |                |        |         |          |          |          |         |              |                  |                  |                  |                |          |        |  |
| 19p                             |            |          |        |        |        |        |         |                |        |        |        |         |              |              |              |              |              |                  |                  |                  |          |                |        |        |        |            |            |                |        |         |          |          |          |         |              |                  |                  |                  |                |          |        |  |
| 19q                             |            |          |        |        |        |        |         |                |        |        |        |         |              |              |              |              |              |                  |                  |                  |          |                |        |        |        |            |            |                |        |         |          |          |          |         |              |                  |                  |                  |                |          |        |  |
| 20p                             |            |          |        |        |        |        |         |                |        |        |        |         |              |              |              |              |              |                  |                  |                  |          |                |        |        |        |            |            |                |        |         |          |          |          |         |              |                  |                  |                  |                |          |        |  |
| 20q                             |            |          |        |        |        |        |         |                |        |        |        |         |              |              |              |              |              |                  |                  |                  |          |                |        |        |        |            |            |                |        |         |          |          |          |         |              |                  |                  |                  |                |          |        |  |
| 21p                             |            |          |        |        |        |        |         |                |        |        |        |         |              |              |              |              |              |                  |                  |                  |          |                |        |        |        |            |            |                |        |         |          |          |          |         |              |                  |                  |                  |                |          |        |  |
| 21q                             |            |          |        |        |        |        |         |                |        |        |        |         |              |              |              |              |              |                  |                  |                  |          |                |        |        |        |            |            |                |        |         |          |          |          |         |              |                  |                  |                  |                |          |        |  |
| CCND1                           |            |          |        |        |        |        |         |                |        |        |        |         |              |              |              |              |              |                  |                  |                  |          |                |        |        |        |            |            |                |        |         |          |          |          |         |              |                  |                  |                  |                |          |        |  |
| CCND2                           |            |          |        |        |        |        |         |                |        |        |        |         |              |              |              |              |              |                  |                  |                  |          |                |        |        |        |            |            |                |        |         |          |          |          |         |              |                  |                  |                  |                |          |        |  |
| MYC                             |            |          |        |        |        |        |         |                |        |        |        |         |              |              |              |              |              |                  |                  |                  |          |                |        |        |        |            |            |                |        |         |          |          |          |         |              |                  |                  |                  |                |          |        |  |
| MYCN                            |            |          |        |        |        |        |         |                |        |        |        |         |              |              |              |              |              |                  |                  |                  |          |                |        |        |        |            |            |                |        |         |          |          |          |         |              |                  |                  |                  |                |          |        |  |
| TP53                            |            |          |        |        |        |        |         |                |        |        |        |         |              |              |              |              |              |                  |                  |                  |          |                |        |        |        |            |            |                |        |         |          |          |          |         |              |                  |                  |                  |                |          |        |  |
| EGFR                            |            |          |        |        |        |        |         |                |        |        |        |         |              |              |              |              |              |                  |                  |                  |          |                |        |        |        |            |            |                |        |         |          |          |          |         |              |                  |                  |                  |                |          |        |  |
| SOX2                            |            |          |        |        |        |        |         |                |        |        |        |         |              |              |              |              |              |                  |                  |                  |          |                |        |        |        |            |            |                |        |         |          |          |          |         |              |                  |                  |                  |                |          |        |  |
| PDGFRA                          |            |          |        |        |        |        |         |                |        |        |        |         |              |              |              |              |              |                  |                  |                  |          |                |        |        |        |            |            |                |        |         |          |          |          |         |              |                  |                  |                  |                |          |        |  |
| CDK6                            |            |          |        |        |        |        |         |                |        |        |        |         |              |              |              |              |              |                  |                  |                  |          |                |        |        |        |            |            |                |        |         |          |          |          |         |              |                  |                  |                  |                |          |        |  |
| FGFR1                           |            |          |        |        |        |        |         |                |        |        |        |         |              |              |              |              |              |                  |                  |                  |          |                |        |        |        |            |            |                |        |         |          |          |          |         |              |                  |                  |                  |                |          |        |  |

**CNV**  
■ Complete arm loss  
■ Complete arm gain  
■ Copy Neutral LOH

**Supplementary Table 5: Copy Number Variation (CNV) calling based on Whole Exome Sequencing data for 67 samples from 9 Diffuse Intrinsic Pontine Glioma patients (DIPG1-DIPG9).**

**Supplementary Table 6: Integrated dataset of DIPG samples from four published studies (n=121) and present work (n=9)**

| Sample         | Tumor Grade | Age   | Gender | H3 mutation | ACVR1       | TP53                        | PPM1D       | PIK3CA         | PIK3R1           | PTEN            | EGFR  | FGFR1                     | PDGFRA                                  | Other mutations           | References             |
|----------------|-------------|-------|--------|-------------|-------------|-----------------------------|-------------|----------------|------------------|-----------------|-------|---------------------------|-----------------------------------------|---------------------------|------------------------|
| SJHGG106_A     | IV          | 3.72  | F      | H3.1 K27M   | R258G       |                             |             | H1047R         |                  |                 |       |                           |                                         |                           | Wu et al. 2014         |
| SJHGG074_D     | IV          | 4.63  | F      | H3.1 K27M   | R258G       |                             |             | I102_V105del   |                  |                 |       |                           |                                         |                           | Wu et al. 2014         |
| SJHGG056_A     | IV          | 5.16  | F      | H3.1 K27M   | R258G       |                             |             |                | L380del          |                 |       |                           |                                         |                           | Wu et al. 2014         |
| SJHGG118_A     | IV          | 3.40  | M      | H3.1 K27M   | G328V       |                             |             |                | K567_I571>       |                 |       |                           |                                         |                           | Wu et al. 2014         |
| SJHGG008_A     | IV          | 3.66  | F      | H3.1 K27M   | G356D       | R273C                       |             |                |                  |                 |       |                           |                                         |                           | Wu et al. 2014         |
| SJHGG070_A     | N/A         | 4.42  | F      | H3.1 K27M   | G328E       | G245C                       |             |                |                  |                 |       |                           |                                         |                           | Wu et al. 2014         |
| SJHGG069_A     | III         | 8.40  | F      | H3.1 K27M   | G328E       |                             |             |                |                  |                 |       |                           | Amp (Microarray CNV)                    |                           | Wu et al. 2014         |
| SJHGG047_A     | IV          | 4.27  | M      | H3.1 K27M   | G328E       |                             |             |                |                  |                 |       |                           |                                         |                           | Wu et al. 2014         |
| SJHGG065_A     | IV          | 6.58  | M      | H3.1 K27M   | R206H       |                             |             |                |                  |                 |       |                           |                                         |                           | Wu et al. 2014         |
| SJHGG077_A     | IV          | 4.20  | F      | H3.1 K27M   | R206H       |                             |             |                |                  |                 |       |                           |                                         |                           | Wu et al. 2014         |
| SJHGG079_A     | N/A         | 5.68  | M      | H3.1 K27M   | R258G       |                             |             |                |                  |                 |       |                           |                                         |                           | Wu et al. 2014         |
| SJHGG117_A     | IV          | 2.58  | F      | H3.1 K27M   | G328E       |                             |             | H1047R         |                  |                 | R108K |                           |                                         |                           | Wu et al. 2014         |
| SJHGG061_A     | IV          | 6.90  | F      | H3.3 K27M   | G328V       |                             |             | P449_L456>L    |                  |                 |       |                           | Amp (Microarray CNV)                    | ATRX gC335>FR             | Wu et al. 2014         |
| SJHGG058_A     | IV          | 5.20  | F      | H3.3 K27M   | G356D       | E180fs                      |             |                |                  |                 |       |                           |                                         |                           | Wu et al. 2014         |
| SJHGG002_A     | IV          | 14.95 | F      | H3.3 K27M   |             | R213X                       |             |                | E545K            |                 |       |                           |                                         |                           | Wu et al. 2014         |
| SJHGG048_A     | IV          | 6.12  | M      | H3.3 K27M   |             | R156_R158>R (LOH)           |             |                | E545K            |                 |       |                           | Amp (Microarray CNV)                    |                           | Wu et al. 2014         |
| SJHGG057_A     | IV          | 12.30 | F      | H3.3 K27M   |             |                             | W427X       |                | E110del          |                 |       |                           |                                         |                           | Wu et al. 2014         |
| SJHGG050_A     | IV          | 5.70  | F      | H3.3 K27M   |             |                             | I466_P467fs |                | K575_R577del     |                 |       |                           |                                         |                           | Wu et al. 2014         |
| SJHGG006_A     | IV          | 3.66  | F      | H3.3 K27M   |             | gE224A (LOH)                |             |                |                  |                 |       |                           |                                         |                           | Wu et al. 2014         |
| SJHGG102_D     | IV          | 4.75  | F      | H3.3 K27M   |             | R273C, Q144X                |             |                |                  |                 |       |                           |                                         |                           | Wu et al. 2014         |
| SJHGG105_A     | IV          | 3.35  | F      | H3.3 K27M   |             | E339X, R248W                |             |                |                  |                 |       |                           |                                         |                           | Wu et al. 2014         |
| SJHGG051_A     | IV          | 15.70 | M      | H3.3 K27M   | S241F       |                             |             |                |                  |                 |       |                           | Amp (Microarray CNV)                    | NF1 I719fs (LOH)          | Wu et al. 2014         |
| SJHGG010325_A1 | IV          | 10.23 | M      | H3.3 K27M   | R273H       |                             |             |                |                  |                 |       |                           | Amp (Microarray CNV)                    |                           | Wu et al. 2014         |
| SJHGG062_A     | IV          | 12.50 | F      | H3.3 K27M   | S241Y       |                             |             |                |                  |                 |       |                           | N659K                                   |                           | Wu et al. 2014         |
| SJHGG001_A     | IV          | 5.33  | F      | H3.3 K27M   | R273C (LOH) |                             |             |                |                  |                 |       |                           | A529>15aa                               |                           | Wu et al. 2014         |
| SJHGG045_A     | N/A         | 11.78 | M      | H3.3 K27M   |             | M237I (LOH)                 |             |                |                  |                 |       |                           |                                         |                           | Wu et al. 2014         |
| SJHGG060_A     | IV          | 13.27 | M      | H3.3 K27M   |             | R248Q (LOH)                 |             |                |                  |                 |       |                           |                                         |                           | Wu et al. 2014         |
| SJHGG073_A     | N/A         | 11.10 | M      | H3.3 K27M   |             | R273C, K120M                |             |                |                  |                 |       |                           |                                         |                           | Wu et al. 2014         |
| SJHGG007_A     | IV          | 10.90 | M      | H3.3 K27M   | S241F       |                             |             |                |                  |                 |       |                           |                                         | NF1 R816X, SV (NF1 CNTN5) | Wu et al. 2014         |
| SJHGG053_A     | IV          | 7.31  | F      | H3.3 K27M   | V173A       |                             |             |                |                  |                 |       |                           |                                         |                           | Wu et al. 2014         |
| SJHGG055_A     | IV          | 6.43  | F      | H3.3 K27M   | H193Y       |                             |             |                |                  |                 |       |                           |                                         |                           | Wu et al. 2014         |
| SJHGG101_A     | IV          | 17.24 | F      | H3.3 K27M   | C176Y       |                             |             |                |                  |                 |       |                           |                                         |                           | Wu et al. 2014         |
| SJHGG004_D     | IV          | 5.47  | M      | H3.3 K27M   |             | L130_N131>L                 |             |                |                  |                 |       |                           |                                         |                           | Wu et al. 2014         |
| SJHGG010324_A1 | N/A         | 9.56  | M      | H3.3 K27M   |             | R174_E180>R                 |             |                |                  |                 |       |                           |                                         |                           | Wu et al. 2014         |
| SJHGG009_A     | IV          | 6.01  | M      | H3.3 K27M   | R303X       |                             |             |                |                  |                 |       |                           |                                         |                           | Wu et al. 2014         |
| SJHGG066_A     | IV          | 9.00  | F      | H3.3 K27M   | R234C       |                             |             |                |                  |                 |       |                           | Amp (Microarray CNV)                    |                           | Wu et al. 2014         |
| SJHGG049_A     | IV          | 13.77 | F      | H3.3 K27M   |             |                             |             |                |                  |                 |       |                           |                                         | CCND2 (Amp)               | Wu et al. 2014         |
| SJHGG054_A     | IV          | 3.96  | F      | H3.3 K27M   |             | G66V                        |             |                |                  |                 |       |                           |                                         |                           | Wu et al. 2014         |
| SJHGG067_A     | IV          | 5.60  | F      | H3.3 K27M   |             |                             |             |                |                  |                 |       |                           |                                         |                           | Wu et al. 2014         |
| SJHGG109_A     | IV          | 8.64  | F      | H3.3 K27M   |             |                             |             |                |                  |                 |       |                           |                                         |                           | Wu et al. 2014         |
| SJHGG068_A     | IV          | 2.97  | M      | H3.3 K27M   |             | Y163C                       |             |                |                  |                 |       |                           |                                         |                           | Wu et al. 2014         |
| SJHGG059_A     | IV          | 8.90  | M      | WT          | G328V       |                             |             | E545K          | T576_R577>R      |                 |       |                           |                                         |                           | Wu et al. 2014         |
| SJHGG064_A     | IV          | 10.20 | M      | WT          | G328V       |                             | Q404X       | H1047R         |                  |                 |       |                           |                                         |                           | Wu et al. 2014         |
| SJHGG071_A     | N/A         | 6.87  | F      | H3.3 K27M   | G328E       |                             | S516X       | E545K          |                  |                 |       |                           |                                         | ATRX T1610R               | Wu et al. 2014         |
| SJHGG005_A     | IV          | 5.35  | F      | WT          | G328V       |                             |             |                |                  |                 |       |                           |                                         |                           | Wu et al. 2014         |
| SJHGG003_A     | IV          | 15.58 | M      | WT          |             | P47_F54fs (LOH)             |             |                |                  |                 |       |                           | Amp (Microarray CNV), SV (DIP2C_PDGFRA) |                           | Wu et al. 2014         |
| SJHGG052_A     | IV          | 5.94  | F      | WT          |             | R158G (LOH)                 |             |                |                  |                 |       |                           |                                         |                           | Wu et al. 2014         |
| SJHGG063_A     | IV          | 5.40  | F      | WT          |             |                             |             |                |                  |                 |       |                           |                                         |                           | Wu et al. 2014         |
| SJHGG076_A     | IV          | 10.25 | F      | H3.3 K27M   |             |                             | E405X       |                |                  |                 |       |                           |                                         |                           | Wu et al. 2014         |
| SJHGG078_A     | IV          | 6.46  | M      | WT          |             |                             |             |                |                  |                 |       |                           |                                         |                           | Wu et al. 2014         |
| SJHGG075_A     | IV          | 1.82  | M      | WT          |             | A88fs                       |             |                |                  |                 |       |                           | Amp (Microarray CNV)                    |                           | Wu et al. 2014         |
| mHGA1          | IV          | 10    | M      | H3.3 K27M   |             |                             |             |                |                  |                 |       |                           |                                         | CHEK2 splicing            | Fontebasso et al. 2014 |
| mHGA2          | IV          | 3.5   | F      | H3.3 K27M   | R206H       |                             |             | E545K          |                  |                 |       |                           |                                         |                           | Fontebasso et al. 2014 |
| mHGA3          | IV          | 5     | M      | H3.3 K27M   |             | R273H                       |             |                |                  |                 |       |                           |                                         |                           | Fontebasso et al. 2014 |
| mHGA4          | IV          | 3     | F      | H3.3 K27M   |             | IHC POSITIVE                |             |                |                  |                 |       |                           |                                         |                           | Fontebasso et al. 2014 |
| mHGA14         | IV          | 10    | F      | H3.3 K27M   |             | R282W                       |             |                |                  |                 |       | Amp (450K CNV), I543_V544 | NF1 LOSS (450K CNV)                     |                           | Fontebasso et al. 2014 |
| mHGA15         | IV          | 8     | F      | H3.3 K27M   |             | R273P                       |             |                |                  |                 |       |                           |                                         |                           | Fontebasso et al. 2014 |
| mHGA16         | IV          | 12    | M      | H3.3 K27M   |             | R248W                       |             |                |                  |                 |       |                           |                                         |                           | Fontebasso et al. 2014 |
| mHGA17         | IV          | 6     | F      | H3.3 K27M   |             | R156Pfs*17)                 |             |                |                  |                 |       |                           |                                         |                           | Fontebasso et al. 2014 |
| mHGA18         | IV          | 11    | F      | H3.3 K27M   |             | R248W                       |             | V344G          |                  | LOSS (450K CNV) |       | Amp (450K CNV)            |                                         |                           | Fontebasso et al. 2014 |
| mHGA19         | IV          | 7     | M      | H3.3 K27M   |             | A159Pfs*11, LOSS (450K CNV) |             |                |                  |                 |       |                           |                                         |                           | Fontebasso et al. 2014 |
| mHGA20         | IV          | 7     | M      | H3.3 K27M   |             | V173L                       |             |                |                  |                 |       |                           |                                         |                           | Fontebasso et al. 2014 |
| mHGA21         | IV          | 4.5   | F      | H3.3 K27M   |             | R175H                       |             |                |                  |                 |       |                           |                                         |                           | Fontebasso et al. 2014 |
| mHGA22         | IV          | 4     | M      | H3.3 K27M   |             | S241P                       |             |                |                  |                 |       |                           |                                         |                           | Fontebasso et al. 2014 |
| mHGA23         | IV          | 7     | F      | H3.3 K27M   |             | V157F                       |             |                |                  |                 |       |                           |                                         |                           | Fontebasso et al. 2014 |
| mHGA24         | IV          | 13    | F      | H3.3 K27M   |             | P152Rfs*27                  |             |                | K447_Y452del     |                 |       |                           |                                         | ATRX Q1034fs              | Fontebasso et al. 2014 |
| mHGA26         | III         | 14    | F      | H3.3 K27M   |             |                             |             |                |                  |                 |       | N546K, 655_655del         |                                         | ATRX C1122Vfs*8)          | Fontebasso et al. 2014 |
| mHGA30         | IV          | 6     | M      | H3.1 K27M   |             | E258G                       |             |                |                  |                 |       |                           |                                         |                           | Fontebasso et al. 2014 |
| mHGA31         | IV          | 4     | M      | H3.1 K27M   | R258G       |                             |             |                | L449_H450delinsY |                 |       |                           |                                         |                           | Fontebasso et al. 2014 |
| mHGA32         | IV          | 3     | M      | H3.1 K27M   | G328E       |                             |             | C420R          |                  |                 |       |                           |                                         |                           | Fontebasso et al. 2014 |
| mHGA33         | III         | 3     | F      | H3.1 K27M   | G328V       |                             | C478X       | Y1038F, H1047R |                  |                 |       |                           |                                         |                           | Fontebasso et al. 2014 |
| mHGA34         | IV          | 9     | F      | H3.1C K27M  | G356D       |                             |             |                |                  |                 |       |                           |                                         |                           | Fontebasso et al. 2014 |
| mHGA35         | IV          | 17    | M      | WT          |             | V173L, LOSS (450K CNV)      |             |                |                  |                 |       |                           | Amp(450K CNV)                           |                           | Fontebasso et al. 2014 |



|              |             |      |   |            |       |              |       |        |                |       |       |  |       |                 |                             |                        |
|--------------|-------------|------|---|------------|-------|--------------|-------|--------|----------------|-------|-------|--|-------|-----------------|-----------------------------|------------------------|
| mHGA38       | IV          | 6    | M | H3.3 K27M  |       | R158G        |       |        |                |       |       |  |       |                 |                             | Fontebasso et al. 2014 |
| mHGA39       | IV          | 7    | F | H3.3 K27M  |       | S241F        |       |        |                |       |       |  |       |                 |                             | Fontebasso et al. 2014 |
| mHGA40       | IV          | 8    | M | H3.3 K27M  |       | Y220C        |       |        |                |       |       |  |       |                 |                             | Fontebasso et al. 2014 |
| HSJD_DIPG002 |             | 6    | F | H3.1 K27M  | R258G |              |       | H1047R |                |       |       |  |       |                 |                             | Taylor et al. 2014     |
| NCHP_DIPG011 |             | 4.8  | F | H3.1 K27M  | G328E |              |       |        | 573-576 del    |       |       |  |       | IGF2R K162R     |                             | Taylor et al. 2014     |
| NCHP_DIPG108 |             | 7.5  | M | H3.1 K27M  | G328V |              |       |        |                | R130X |       |  |       |                 |                             | Taylor et al. 2014     |
| HSJD_DIPG004 |             | 10   | F | H3.1 K27M  | G328E |              |       |        |                |       |       |  |       |                 |                             | Taylor et al. 2014     |
| NCHP_DIPG052 |             | 4.6  | M | H3.1 K27M  | G328V |              |       |        |                |       |       |  |       |                 |                             | Taylor et al. 2014     |
| NCHP_DIPG113 |             | 4.6  | M | H3.1 K27M  | G356D |              |       |        |                |       |       |  |       |                 |                             | Taylor et al. 2014     |
| NCHP_DIPG114 |             | 8.6  | M | H3.1 K27M  |       |              |       | Q546K  |                |       |       |  |       |                 |                             | Taylor et al. 2014     |
| NCHP_DIPG103 |             | 5.8  | F | H3.1 K27M  |       | E221X        |       |        |                |       |       |  |       |                 |                             | Taylor et al. 2014     |
| NCHP_DIPG081 |             | 6.7  | M | H3.3 K27M  |       | R273H        |       |        |                |       |       |  |       |                 |                             | Taylor et al. 2014     |
| NCHP_DIPG105 |             | 6.6  | F | H3.3 K27M  |       | R175H        |       |        |                |       |       |  |       |                 |                             | Taylor et al. 2014     |
| NCHP_DIPG061 |             | 11.9 | F | H3.3 K27M  |       | V157F        |       |        |                |       |       |  |       |                 |                             | Taylor et al. 2014     |
| NCHP_DIPG102 |             | 10.3 | M | H3.3 K27M  |       | C135Y        |       |        |                |       |       |  |       |                 |                             | Taylor et al. 2014     |
| HSJD_DIPG001 |             | 6    | F | H3.3 K27M  |       | G244S        |       |        |                |       |       |  |       |                 |                             | Taylor et al. 2014     |
| NCHP_DIPG112 |             | 5.6  | F | H3.3 K27M  |       | R273C        |       |        |                |       |       |  |       |                 |                             | Taylor et al. 2014     |
| NCHP_DIPG111 |             | 10.6 | F | H3.3 K27M  |       | 156fs        |       |        |                |       |       |  |       |                 |                             | Taylor et al. 2014     |
| NCHP_DIPG109 |             | 6.2  | M | H3.3 K27M  |       | R273C        |       |        |                |       |       |  |       |                 |                             | Taylor et al. 2014     |
| NCHP_DIPG065 |             | 10.2 | M | H3.3 K27M  |       | A159V        |       |        |                | K567E |       |  |       |                 |                             | Taylor et al. 2014     |
| NCHP_DIPG006 |             | 6.3  | M | H3.3 K27M  |       |              | L513X | E542K  |                |       |       |  |       |                 |                             | Taylor et al. 2014     |
| HSJD_DIPG003 |             | 6    | M | H3.3 K27M  |       |              | S468X | H1047R |                |       |       |  |       |                 |                             | Taylor et al. 2014     |
| HSJD_DIPG008 |             | 6.5  | M | H3.3 K27M  |       |              | 429fs |        |                |       |       |  |       |                 |                             | Taylor et al. 2014     |
| NCHP_DIPG107 |             | 8.8  | M | H3.3 K27M  |       |              |       |        |                | K379E |       |  |       |                 |                             | Taylor et al. 2014     |
| NCHP_DIPG101 |             | 3.9  | F | H3.3 K27M  |       |              |       |        |                |       |       |  |       | ATM 1190-1191fs |                             | Taylor et al. 2014     |
| HSJD_DIPG007 |             | 9.9  | M | H3.3 K27M  | R206H |              | 428fs | C420R  |                |       |       |  |       |                 |                             | Taylor et al. 2014     |
| HSJD_DIPG106 |             | 12.1 | M | WT         |       |              | 483fs | H1047R |                |       |       |  |       |                 |                             | Taylor et al. 2014     |
| HSJD_DIPG104 |             | 4.4  | M | WT         |       |              |       |        |                |       |       |  |       | IGF2R D1830R    |                             | Taylor et al. 2014     |
| HSJD_DIPG110 |             | 5.7  | F | WT         |       |              |       |        |                |       |       |  |       | NF1 R192X       |                             | Taylor et al. 2014     |
| DIPG03       | GBM         | NA   | M | H3.1C K27M |       | 1            |       |        |                |       |       |  |       |                 |                             | Buczkowicz et al. 2014 |
| DIPG62       | AA          | NA   | M | H3.1 K27M  | G328E | R43H         |       |        |                |       |       |  |       |                 |                             | Buczkowicz et al. 2014 |
| DIPG26       | LGA         | NA   | F | H3.3 K27M  |       | S339P        |       | E545G  |                |       |       |  |       |                 |                             | Buczkowicz et al. 2014 |
| DIPG07       | GBM         | NA   | M | H3.3 K27M  |       | R43H         |       |        |                |       |       |  |       |                 |                             | Buczkowicz et al. 2014 |
| DIPG08       | GBM         | NA   | F | H3.3 K27M  |       | R26fs        |       |        |                |       |       |  |       |                 |                             | Buczkowicz et al. 2014 |
| DIPG24       | GBM         | NA   | F | H3.3 K27M  |       | R141C        |       |        |                |       |       |  |       |                 |                             | Buczkowicz et al. 2014 |
| DIPG27       | GBM         | NA   | M | H3.3 K27M  |       | 1            |       |        |                |       |       |  |       |                 |                             | Buczkowicz et al. 2014 |
| DIPG57       | GBM         | NA   | F | H3.3 K27M  |       | 1            |       |        |                |       |       |  |       |                 |                             | Buczkowicz et al. 2014 |
| DIPG60       | GBM         | NA   | M | H3.3 K27M  |       | 1            |       |        |                |       |       |  |       |                 |                             | Buczkowicz et al. 2014 |
| DIPG06       | GBM         | NA   | M | H3.3 K27M  |       | S109P        |       |        |                |       |       |  |       |                 |                             | Buczkowicz et al. 2014 |
| DIPG19       | GBM         | NA   | F | H3.3 K27M  |       | V41L         |       |        |                |       |       |  |       |                 |                             | Buczkowicz et al. 2014 |
| DIPG28       | AA          | NA   | M | H3.3 K27M  |       | 1            |       |        |                |       |       |  | T281P |                 |                             | Buczkowicz et al. 2014 |
| DIPG30       | GBM         | NA   | M | H3.3 K27M  | 1     |              |       |        |                |       |       |  |       |                 |                             | Buczkowicz et al. 2014 |
| DIPG04       | GBM         | NA   | M | H3.3 K27M  |       | V25F         |       |        |                |       |       |  |       |                 |                             | Buczkowicz et al. 2014 |
| DIPG61       | GBM         | NA   | M | H3.3 K27M  |       | 1            |       |        |                |       |       |  |       |                 |                             | Buczkowicz et al. 2014 |
| DIPG58       | GBM         | NA   | F | H3.3 K27M  |       |              |       |        | Q325X, N344del |       |       |  |       |                 |                             | Buczkowicz et al. 2014 |
| DIPG25       | AA          | NA   | F | H3.3 K27M  |       |              |       |        |                |       |       |  |       |                 |                             | Buczkowicz et al. 2014 |
| DIPG29       | GBM         | NA   | F | WT         |       |              |       |        |                |       |       |  |       |                 |                             | Buczkowicz et al. 2014 |
| DIPG18       | GBM         | NA   | M | WT         |       | 1            |       |        |                |       |       |  |       |                 |                             | Buczkowicz et al. 2014 |
| DIPG1        | GBM         | 21.2 | M | H3.1 K27M  |       |              |       |        | Splicing       |       |       |  |       |                 | CTNNA2 A260S                | Present study          |
| DIPG2        | GBM         | 6.10 | M | H3.1 K27M  | G328V |              |       | H1047R |                |       | A126S |  |       |                 | MAX R51Q                    | Present study          |
| DIPG3        | GBM         | 7.5  | F | H3.2C K27M | G328V |              |       | H1047R |                |       |       |  |       |                 |                             | Present study          |
| DIPG4        | GBM         | 5.6  | F | H3.3 K27M  | R206H | C3F          |       |        |                |       |       |  |       |                 |                             | Present study          |
| DIPG5        | GBM         | 8    | M | H3.3 K27M  |       | A175fs       | W427X |        |                |       |       |  |       |                 | ATRX D94fs                  | Present study          |
| DIPG6        | Astrocytoma | 6    | M | H3.3 K27M  |       | G113D        |       | H1047R |                |       |       |  |       |                 | ATRX splicing, OLIG2 P215fs | Present study          |
| DIPG7        | GBM         | 10.8 | F | H3.3 K27M  |       | R43H         |       |        |                |       |       |  |       |                 |                             | Present study          |
| DIPG8        | GBM         | 5    | M | H3.3 K27M  |       | P58fs, E162X |       |        |                |       |       |  |       |                 |                             | Present study          |
| DIPG9        | GBM         | 9.3  | M | H3.3 K27M  |       |              | E525X |        |                |       |       |  |       |                 | ATRX V1514D                 | Present study          |

**Supplementary Table 6:** Integrated dataset of Diffuse Intrinsic Pontine Glioma samples from four published studies (n=121) and present work (n=9) showing ditribtuion of histone mutations.

**Supplementary Table 7:** Mutation analysis of biopsy (obtained at diagnosis) and autopsy pairs from the same patients

| Sample Name | Type    | H3 Mutation | Other Accompanying Mutations |                    |
|-------------|---------|-------------|------------------------------|--------------------|
| SJHGG001    | Autopsy | H3.3 K27M   | TP53_p.R273C (LOH)           | PDGFRA_p.A529>15aa |
|             | Biopsy  | H3.3 K27M   | TP53_p.R273C (LOH)           | PDGFRA_p.A529>15aa |
| SJHGG002    | Autopsy | H3.3 K27M   | TP53_p.R213*                 | PIK3CA_p.E545K     |
|             | Biopsy  | H3.3 K27M   | TP53_p.R213*                 | TP53_p.L252P       |
| mHGA18      | Autopsy | H3.3 K27M   | TP53_p.R248W                 | PIK3CA_p.V344G     |
|             | Biopsy  | H3.3 K27M   | TP53_p.R248W                 | PIK3CA_p.V344G     |

**Supplementary Table 7:** Mutation status of the main histone drivers and accompanying genes obtained from analysis of samples acquired at biopsy and autopsy from three Diffuse Intrinsic Pontine Glioma (DIPG) patients.



## 1 **Discussion**

2 Genomic analysis of autopsy DIPG brains provides a fascinating opportunity to reconstruct the  
3 evolution of this deadly tumor, and has important implications on potential therapeutic  
4 interventions. Despite the sample number limitation based on disease incidence, this study  
5 provides insight into the spatial and temporal evolution of the tumor genome in DIPG helping  
6 derive a general model for this disease.

7

8 Our analysis suggests that H3K27M mutations are the initial oncogenic event in DIPGs.  
9 However, these mutations are not solely sufficient for tumor formation, as they require, nearly  
10 universally, obligate partners for effective tumorigenesis. There is some disagreement in the  
11 cancer field as to the definition of “driver” versus “passenger” mutations. The designation  
12 passenger has been used for any variant that is not absolutely essential to the tumorigenesis.  
13 However, for the purpose of this study – and more generally – we postulate three categories of  
14 mutations: 1) Main driver mutations are essential to initiate and continue tumorigenesis; 2)  
15 Accessory driver mutations can further promote and accelerate tumor growth but are not  
16 absolutely essential; 3) Passenger mutations are neutral and do not affect the tumor. H3K27M  
17 and their obligate partners appear thus to be the main driver mutations, since they always co-  
18 occur together throughout each tumor.

19 These K27MH3.3 partner mutations are mostly genetic alterations affecting the TP53 pathway,  
20 mainly *TP53* and less frequently *PPM1D* genes. H3K27M mutants also favor association with  
21 *ACVR1* gain of function mutations and in rare cases (1 in our dataset and 2 in other reported  
22 cases) *PIK3R1* mutations. Interestingly, even if more frequent, *PIK3CA* mutations, including  
23 *PIK3CAH1047R*, clearly fall into the accessory driver category, since they were invariably sub-

1 clonal in our dataset and in some other reported cases. Similarly, a PTEN mutation was also  
2 found in some but not all tumor areas in DIPG2 (Fig. 3). We can only speculate at this time as to  
3 why mutations that ultimately activate the PI3K/AKT pathway appear clonal for some of the  
4 component genes and subclonal for others. This may be related to the dosage effect of pathway  
5 activation, as the loss of the regulatory unit (*PIK3R1*) leads to increased baseline activity of the  
6 wild-type kinase whereas the PIK3CAH1047R mutation has been associated with higher kinase  
7 activity and oncogenic potential through cellular reprogramming and induction of stemness  
8 properties<sup>24</sup>. Further studies are needed to help ascertain the specific role of these accessory  
9 driver mutations in oncohistone tumorigenesis.

10

11 Once acquired, the main driver partnership is maintained throughout the course of the disease  
12 (diagnosis to autopsy), in all cells across the primary tumor site, and in tumor spread throughout  
13 the brain. The obligate partner is not chosen randomly. One speculation about the phenotypic  
14 advantage of the gain of additional mutations may be that the partners are selected as those best  
15 suited to increase levels of mutant H3 in cells. Indeed, H3K27M mutants show a dose-dependent  
16 effect in inducing cellular proliferation<sup>26,27</sup>. Canonical H3 variants are the most abundant  
17 histones in cells and need cell-cycle division (S-phase) for synthesis, whereas non-canonical  
18 H3.3 variants represent ~5% of all H3 in cells and are present throughout the cell cycle.  
19 Accordingly, H3K27M mutations in cell cycle-dependent canonical histones may co-occur with  
20 alterations affecting ACVR1, a growth factor that induces cell division, resulting in the synthesis  
21 of wildtype and mutant H3.1 proteins. H3K27M mutations in the non-canonical H3.3 histone are  
22 mainly associated with mutations affecting the TP53 pathway, as these possibly offer evasion  
23 from cell death and senescence and provide the needed opportunity for the mutant H3.3K27M to



1 exert its effect over a longer period, effectively reshaping the epigenome and drive tumor  
2 formation.

3

4 The previously unsuspected homogeneity for main driver mutations across the course of the  
5 disease we uncover in this study indicates that efforts to cure DIPG should be directed at the  
6 oncohistone partnership, as other genetic alterations are generally sub-clonal. Our findings  
7 further indicate that needle biopsies recommended to orient care are representative of the main  
8 drivers in DIPG even if the regional heterogeneity of other secondary targetable alterations, such  
9 as PIK3CA mutations, may not be fully captured. Based on early tumor spread, efforts to cure  
10 DIPG should aim for early systemic tumor control as opposed to regimens focused on the pons.

1 **Methods**

2 **Patient samples**

3 All patient samples were collected with informed consent in accordance with the respective  
4 Ethics Review Boards of the institutions that provided them. DIPG post-mortem specimen  
5 procurement was performed as previously described<sup>19</sup>. Briefly, brainstem and cerebellum were  
6 removed *en bloc* from the whole brain, and dissected into ~9 transverse sections. The cerebral  
7 cortex was dissected into ~11 coronal sections. The brainstem, cerebellum, and cerebral cortex  
8 sections were alternatively frozen or fixed in formalin. A total of 158 samples were studied by  
9 immunohistochemistry and molecular analyses, representing various neuroanatomical locations  
10 such as frontal, parietal, temporal, occipital lobes, thalamus, lateral ventricles, hippocampus,  
11 midbrain, pons, medulla, and cerebellum (Supplementary Tables 1-3; Supplementary Fig. 1). For  
12 molecular studies (RNA, DNA) 134 core punches were obtained using a biopsy punch and  
13 plunger (2mm, #33-31, Integra Miltex, York, PA). All histological sections were reviewed by  
14 neuropathologists (C-Y.H.; J.K.), according to the World Health Organization (WHO)  
15 classification of tumors. Demographical, clinical and histopathological characteristics of all  
16 specimens are presented in Supplementary Table 1.

17

18 **Immunohistochemistry**

19 Immunohistochemistry was performed on 5µm thick FFPE slides. Briefly, slides were de-  
20 paraffinized, processed for epitope retrieval, DAB detected using reagents customized for the  
21 Leica BOND-MAX automated stainer (Leica Biosystems, Buffalo Grove, IL). Processed slides  
22 were probed by immunohistochemical assay for hematoxylin and eosin (H&E), Ki67, H3-K27M,  
23 and H3-K27me3 as previously described<sup>12</sup> (Supplementary Fig. 2).



1

## 2 **Antibodies**

3 Rabbit monoclonal anti-Ki67 (Biocare Medical, Concord, CA) were pre-diluted and ready to use.  
4 Rabbit polyclonal anti-H3K27M (#ABE419 Millipore, Billerica, MA, 1:500), rabbit monoclonal  
5 anti-H3K27me3 (C36B11, #9733 Cell Signaling, Beverly, MA 1:75) were diluted in Bond  
6 primary antibody diluent (#AR9352 Leica Biosystems, Buffalo Grove, IL). Secondary detection  
7 was conducted using the Bond polymer refined detection kit (Leica Biosystems, Buffalo Grove,  
8 IL). Slides were counterstained for hematoxylin nuclear stain.

9

## 10 **RNA and DNA extractions**

11 Frozen tissue samples were homogenized with Trizol, and nucleic acids were phase separated  
12 using chloroform. Total RNA was extracted according to the PicoPure RNA Isolation kit  
13 (Arctus Bioscience Inc. Mountain view, CA). Genomic DNA was extracted from frozen tissue  
14 using the Genra Puregene DNA extraction kit, or from FFPE tissue using the QiaAmp DNA  
15 mini kit according to the manufacturer's instructions (Qiagen, Valencia, CA). All DNA  
16 quantifications were conducted using the Quant-iT Picogreen dsDNA assay kit (Life  
17 Technologies, Carlsbad, CA).

18

## 19 **Droplet Digital PCR**

20 Digital droplet PCR (ddPCR) assays were performed according to standard methods. Briefly,  
21 each 20 ul reaction contained 1X ddPCR Supermix for Probes (Bio-Rad), 900 nM gene specific  
22 HPLC-purified forward and reverse primer, 250 nM gene-specific mutant or wild-type LNA  
23 probe and 12.5-25.0 ng genomic DNA. Each reaction was mixed with 60 ul Droplet Generation

1 Oil (Bio-Rad), partitioned into ~12,000 -16,000 droplets in QX100 Droplet Generator (Bio-Rad),  
2 transferred to a 96-well plate and sealed. The primers and probes were designed by Integrated  
3 DNA Technologies (IDT) as follows: forward primer for *H3F3A*:  
4 5'-GTACAAAGCAGACTGCCCCGCAAAT-3', reverse primer  
5 5'-GTGGATACATACAAGAGAGACTTTGTCCC-3'. Forward primer for *HIST1H3B*: 5'-  
6 ACAGACGTCTCTGCAGGCAAGC-3', reverse primer 5'-GGCGGTAACGGTGAGGCTTT-  
7 3'. *H3F3A* K27M wild-type probe (HEX) CA+C+T+C+T+T+GC and mutant probe (FAM)  
8 CA+CT+C+A+T+GCG. *HIST1H3B* K27M wild-type probe (HEX) T+CGC+A+A+GAG+CG  
9 and mutant probe (FAM) TCGC+A+T+G+AGCG. The PCRs were performed in a T100  
10 Thermal Cycler (Bio-Rad) with the following cycling conditions: 1× (95°C for 10 min), 50×  
11 (95°C for 30 s, 53°C or 57°C for 60 s, with 2°C /s ramp rate and 1× (98°C for 10 min).  
12 Following end-point amplification, the fluorescence intensity of individual droplets was  
13 measured with the QX100 Droplet Reader (Bio-Rad) and data analysis was performed with  
14 QuantaSoft droplet reader software (Bio-Rad). Positive and negative droplet populations were  
15 detected either automatically or manually on two-dimensional graphs and target DNA  
16 concentrations were calculated using the Poisson statistics<sup>28</sup>. The absolute transcript levels were  
17 initially computed as copies/μl PCR for both mutant and wild-type and then presented as percent  
18 of total gene copy.

19

## 20 **Whole-exome sequencing**

21 Genomic DNA was extracted from multiple post-mortem samples patient using the standard  
22 extraction methods as described by Qiagen. Nextera Rapid Capture Exome kit was used to  
23 prepare the paired-end libraries according to the manufacturer's instructions using on average 36



1 ng of total starting genomic DNA. Sequencing was performed on Illumina HiSeq 2000 using  
2 rapid-run mode with 100 bp paired-end reads. Next, adaptor sequences were removed; reads  
3 were trimmed for quality using the FASTX-Toolkit. An in-house program was used to ensure the  
4 presence of exclusively paired-reads to be used in further steps of the analysis. We next aligned  
5 the reads using Burrows-Wheeler Aligner (BWA) 0.7.7 to hg19 as reference genome. Indel  
6 realignment was performed using the Genome Analysis Toolkit (GATK)<sup>29</sup> We next marked the  
7 duplicate reads using Picard and excluded them from further analyses as previously described<sup>6</sup>.  
8 The coverage of consensus coding sequence (CCDS) bases was assessed using GATK. The  
9 average coverage over all the samples was 70x. The majority of samples had >90% of CCDS  
10 bases covered by at least 10 reads and > 83% of CCDS bases covered by at least 20 reads.  
11 We called SNVs and short indels using SAMtools mpileup with the extended base alignment  
12 quality (BAQ) adjustment (-E)<sup>30,31</sup>. Next we filtered them for quality so that at least 10% of  
13 reads supporting each variant call. We used both ANNOVAR<sup>32</sup> and in-house tools to annotate  
14 the variants and to identify whether these variants affect protein-coding sequence and if they had  
15 previously been observed in datasets including the 1000 Genomes Project data set (November  
16 2011), the National Heart, Lung, and Blood Institute (NHLBI) Grand Opportunity (GO) exomes  
17 or in approximately 3,000 exomes previously sequenced at our center. Results of whole exome  
18 sequencing are summarized in Supplementary Table 4 and presented for individual patients as  
19 follows: DIPG1 in Supplementary Data 1; DIPG2 in Supplementary Data 2; DIPG3 in  
20 Supplementary Data 3; DIPG4 in Supplementary Data 4; DIPG5 in Supplementary Data 5;  
21 DIPG6 in Supplementary Data 6; DIPG7 in Supplementary Data 7; DIPG8 in Supplementary  
22 Data 8; DIPG9 in Supplementary Data 9.

23

## 1 **Exploratory targeted high-depth DNA sequencing of hotspot mutations**

2 Genomic DNA from DIPG samples were used for high-depth sequencing using Illumina MiSeq  
3 platform. The MiSeq panel covers exons in 16 Histone H3 isoforms (10 H3.1, 2 H3.2 and 3 H3.3  
4 genes) and covering hotspot mutations such as *IDH1* mutation (codon 132), *IDH2* (codons 140  
5 and 172), *ACVRI* (exons 6-9) and *BRAF* (exons 11 and 15) and *PPM1D* (exon 6). Genomic  
6 DNA samples were sequenced using the MiSeq sequencing platform (Illumina) as previously  
7 described<sup>6</sup> with an average coverage of > 20,000X of the analogous K27M base change across  
8 the three histone variants.

9 To estimate allele frequency of mutations identified using whole exome sequencing genomic  
10 DNA from the same samples was also used for high-depth sequencing on the MiSeq platform  
11 with an average coverage of > 4,000 x. Reads were mapped to the reference genome (human  
12 hg19) using the BWA genome alignment<sup>30,31</sup>. Alignment files were fed to an in-house program  
13 to calculate different variations' allele frequencies at the desired positions.

14

## 15 **RNA Sequencing**

16 We used Qiagen RNeasy Lipid Tissue Mini kit to extract RNA from tumor DIPG3 (Pons 1 and  
17 Pons 2) according to manufacturer's instructions. Library was prepared using rRNA depletion  
18 methods according to instruction from Epicentre (manufacturer) to achieve greater coverage of  
19 mRNA. Paired-end sequencing was performed on the Illumina HiSeq 2000 platform.

20

## 21 **DNA Methylation Analysis**

22 Methylation profiling data was analyzed as previously described<sup>6</sup>. The raw data were subject to  
23 quality control and preprocessing utilizing the R package minfi, and normalized for technical



1 variation between the Infinium I and II probes using the SWAN method. We removed probes on  
2 sex chromosomes (chrX, Y), those containing SNPs (dbSNP:  
3 <http://www.ncbi.nlm.nih.gov/SNP/>) as well as non-specific probes that bind to multiple genomic  
4 locations. Unsupervised hierarchical clustering was performed using average linkage and  
5 Pearson rank correlation distance on the top 5,000 most variable probes selected based on  
6 standard deviation of beta values ( $\beta$ -values).

7

### 8 **Copy Number Variation analysis**

9 To study copy number variations in our samples we developed an in-house program to calculate  
10 the deviation of B allele frequency from 50% as well as normalized coverage from whole exome  
11 sequencing data (adapted from methods used in FishingCNV<sup>33</sup> and ExomeAI<sup>34</sup>). Different CNV  
12 events (duplication, deletion, copy neutral LOH) were called based upon the B allelic imbalance  
13 and the status of the normalized coverage as follow: Deviation from 50% B allele frequency and  
14 an increase in normalized coverage was considered as amplification, Deviation from 50% B  
15 allele frequency and decrease in normalized coverage as deletion, and Deviation from 50% B  
16 allele frequency and no change in the normalized coverage was considered as potential copy  
17 neutral loss of heterozygosity. We mainly assessed the CNV events at the chromosomal arm  
18 level. The results of our CNV detection are presented in Supplementary Fig. 5 and  
19 Supplementary Table 14.

20

### 21 **OncoScan verification of the CNV events**

22 OncoScan® FFPE Assay Kit, provided by Affymetrix, is a platform based on Molecular  
23 Inversion Probe (MIP) technology, used to asses copy number and loss of heterozygosity using

1 small amounts of DNA from FFPE samples. We performed this assay on several samples in  
2 order to verify our WES based CNV detection method. Genomic DNA was quantified using  
3 Picogreen protocol (Quant-iT™ PicoGreen® dsDNA Products, Invitrogen, P-7589) and read on  
4 SpectraMAX GeminiXS Spectrophotometer. The OncoScan® FFPE Assay Kit was used  
5 according to the manufacturer's instructions (Affymetrix). A GeneAmp PCR system 9700  
6 Thermal Cycler (Life Technologies) was used from the Anneal stage to the Denaturation stage.  
7 QC gels of the PCR and HaeIII digest products were performed on E-Gel® 48 4% Agarose Gels  
8 using Mother E-Base™ Device (Life Technologies) and imaged with SYNGENE GeneGenius  
9 Bio Imaging System (Syngene). The digest DNA target was hybridized on OncoScan® Array,  
10 (Affymetrix) and incubated at 49°C in the Genechip® Hybridization oven 640 (Affymetrix) for  
11 17 hours at 60 rpm. OncoScan® Arrays were then washed in a GeneChips® Fluidics Station 450  
12 (Affymetrix) using OncoScan® Stain and Wash Reagents according to the manufacturer's  
13 instructions (Affymetrix). The microarrays were finally scanned on a GeneChip® scanner 3000  
14 (Affymetrix). Data QC analysis was performed with the OncoScan Consol 1.2.0.50 software  
15 (Affymetrix) using OncoScan Analysis Library files r1.1. OncoScan® Positive and negative  
16 Control supplied in the OncoScan® FFPE Assay Kit were used for internal controls to assess the  
17 performance of each run. CNV events were called using the normalized data using Nexus  
18 Express for OncoScan 3.1 (Affymetrix). The OncoScan plots are represented in Supplementary  
19 Fig. 6.

20

### 21 **Constructing evolutionary trees**

22 We used PhyloWGS<sup>35</sup> to reconstruct the tumor phylogeny, which uses a Bayesian approach to  
23 infer cellular frequencies from mutation allele frequencies. It applies Dirichlet process to cluster



1 mutations with similar cellular frequencies and the tree-structured stick-breaking process to  
2 model the clonal evolutionary tree. For multi-region samples from the same patient, we  
3 normalized the read counts used for phylogenetic tree construction by copy number counts from  
4 CNV analysis. Read counts were corrected for the CNV events (Supplementary Fig. 5; Table 3)  
5 for each sample as follow: in case of duplication  $Ref' = Ref$ ,  $Alt' = Alt/2$ ; in case of deletion  $Ref'$   
6  $= Ref + Alt$ ,  $Alt' = Alt$ ; in case of a gene on chromosome X  $Ref' = Ref *2 + Alt$ ,  $Alt' = Alt$ ; in  
7 case of Copy Neutral LOH  $Ref' = Ref+Alt/2$ , and  $Alt' = Alt/2$ . The reconstructed trees were  
8 redrawn in Graphviz by using in-house scripts adapted from AncesTree<sup>36</sup> to show the trajectories  
9 of mutations with contribution greater than 0.05.

10

### 11 **Differential Expression and Gene Set Enrichment Analysis**

12 We aligned RNASeq data from DIPG3-Pons 1 and DIPG3-Pons 2 (RNA extraction and  
13 sequencing protocol described before) using STAR 2.3.0<sup>37</sup>, and analyzed differentially expressed  
14 genes using DeSEQ2<sup>36</sup>. The top 200 over expressed and top 200 under expressed genes in  
15 DIPG3-Pons 2 (the sub-clone with PIK3CA activating mutation) were analyzed for geneset  
16 enrichment using both AmiGo 2 tool<sup>38</sup> provided by Gene Ontology and DAVID<sup>39</sup>. We used  
17 PANTHER Overrepresentation Test (release 20150430) for analysis type by Amigo 2  
18 (annotation version and release date: GO Ontology database Released 2015-08-06.) The top  
19 pathways found by AmiGo 2 to be enriched with enrichment folds higher than 5 and (Bonferroni  
20  $< 0.05$ ) were retained. We used functional annotation clustering and set the stringency to the  
21 highest in DAVID and filtered the results for enrichment folds higher than 5 (Bonferroni  
22 corrected  $p$ -value  $< 0.05$ .) We used the set of genes with at least 50 RNASeq reads in both  
23 DIPG3 Pons1 and 2 combined as background gene set in this analysis (Supplementary Data 10).

1  
2  
3  
4  
5  
6  
7  
8  
9  
10  
11  
12

**URLs**

FASTX-Toolkit, [http://hannonlab.cshl.edu/fastx\\_toolkit/](http://hannonlab.cshl.edu/fastx_toolkit/); Genome Analysis Toolkit (GATK), <http://www.broadinstitute.org/gsa/wiki/>; Picard, <http://picard.sourceforge.net/>; SAMtools, <http://samtools.sourceforge.net/>; dbSNP, <http://www.ncbi.nlm.nih.gov/SNP/>.  
Amigo 2, <http://amigo.geneontology.org/amigo>; DAVID, <https://david.ncifcrf.gov/>.

**Accession Numbers**

Whole-exome sequencing data for all tumors (along with RNA sequencing data for DIPG3), and also DNA methylation profiles can be accessed through the European Genome Archive (EGA) at the following accession EGAS00001001654 and Gene Expression Omnibus (GEO) under accession GSE77353 respectively.



1 **References**

- 2
- 3 1. Buczkowicz, P., Bartels, U., Bouffet, E., Becher, O. & Hawkins, C. Histopathological
- 4 spectrum of paediatric diffuse intrinsic pontine glioma: diagnostic and therapeutic
- 5 implications. *Acta Neuropathol* **128**, 573-581 (2014).
- 6 2. Khuong-Quang, D.A. *et al.* K27M mutation in histone H3.3 defines clinically and
- 7 biologically distinct subgroups of pediatric diffuse intrinsic pontine gliomas. *Acta*
- 8 *Neuropathol* **124**, 439-447 (2012).
- 9 3. Schwartzenuber, J. *et al.* Driver mutations in histone H3.3 and chromatin remodelling
- 10 genes in paediatric glioblastoma. *Nature* **482**, 226-231 (2012).
- 11 4. Wu, G. *et al.* Somatic histone H3 alterations in pediatric diffuse intrinsic pontine gliomas
- 12 and non-brainstem glioblastomas. *Nat Genet* **44**, 251-253 (2012).
- 13 5. Buczkowicz, P. *et al.* Genomic analysis of diffuse intrinsic pontine gliomas identifies
- 14 three molecular subgroups and recurrent activating ACVR1 mutations. *Nat Genet* **46**,
- 15 451-456 (2014).
- 16 6. Fontebasso, A.M. *et al.* Recurrent somatic mutations in ACVR1 in pediatric midline
- 17 high-grade astrocytoma. *Nat Genet* **46**, 462-466 (2014).
- 18 7. Taylor, K.R. *et al.* Recurrent activating ACVR1 mutations in diffuse intrinsic pontine
- 19 glioma. *Nat Genet* **46**, 457-461 (2014).
- 20 8. Wu, G. *et al.* The genomic landscape of diffuse intrinsic pontine glioma and pediatric
- 21 non-brainstem high-grade glioma. *Nat Genet* **46**, 444-450 (2014).
- 22 9. Kumar, A. *et al.* Deep sequencing of multiple regions of glial tumors reveals spatial
- 23 heterogeneity for mutations in clinically relevant genes. *Genome Biol* **15**, 530 (2014).

- 1 10. Sottoriva, A. *et al.* Intratumor heterogeneity in human glioblastoma reflects cancer  
2 evolutionary dynamics. *Proc Natl Acad Sci U S A* **110**, 4009-4014 (2013).
- 3 11. Szerlip, N.J. *et al.* Intratumoral heterogeneity of receptor tyrosine kinases EGFR and  
4 PDGFRA amplification in glioblastoma defines subpopulations with distinct growth  
5 factor response. *Proc Natl Acad Sci U S A* **109**, 3041-3046 (2012).
- 6 12. Bechet, D. *et al.* Specific detection of methionine 27 mutation in histone 3 variants  
7 (H3K27M) in fixed tissue from high-grade astrocytomas. *Acta Neuropathol* **128**, 733-741  
8 (2014).
- 9 13. Caretti, V. *et al.* Subventricular spread of diffuse intrinsic pontine glioma. *Acta*  
10 *Neuropathol* **128**, 605-607 (2014).
- 11 14. Gerlinger, M. *et al.* Intratumor heterogeneity and branched evolution revealed by  
12 multiregion sequencing. *N Engl J Med* **366**, 883-892 (2012).
- 13 15. Eleveld, T.F. *et al.* Relapsed neuroblastomas show frequent RAS-MAPK pathway  
14 mutations. *Nat Genet* **47**, 864-871 (2015).
- 15 16. Wu, X. *et al.* Clonal selection drives genetic divergence of metastatic medulloblastoma.  
16 *Nature* **482**, 529-533 (2012).
- 17 17. Johnson, B.E. *et al.* Mutational analysis reveals the origin and therapy-driven evolution  
18 of recurrent glioma. *Science* **343**, 189-193 (2014).
- 19 18. Walker, D.A. *et al.* A multi-disciplinary consensus statement concerning surgical  
20 approaches to low-grade, high-grade astrocytomas and diffuse intrinsic pontine gliomas  
21 in childhood (CPN Paris 2011) using the Delphi method. *Neuro Oncol* **15**, 462-468  
22 (2013).



- 1 19. Kambhampati, M. *et al.* A standardized autopsy procurement allows for the  
2 comprehensive study of DIPG biology. *Oncotarget* **6**, 12740-12747 (2015).
- 3 20. Castel, D. *et al.* Histone H3F3A and HIST1H3B K27M mutations define two subgroups  
4 of diffuse intrinsic pontine gliomas with different prognosis and phenotypes. *Acta*  
5 *Neuropathol* **130**, 815-827 (2015).
- 6 21. Nik-Zainal, S. *et al.* Mutational processes molding the genomes of 21 breast cancers. *Cell*  
7 **149**, 979-993 (2012).
- 8 22. Popic, V. *et al.* Fast and scalable inference of multi-sample cancer lineages. *Genome Biol*  
9 **16**, 91 (2015).
- 10 23. Zhang, L. *et al.* Exome sequencing identifies somatic gain-of-function PPM1D mutations  
11 in brainstem gliomas. *Nat Genet* **46**, 726-730 (2014).
- 12 24. Koren, S. *et al.* PIK3CA(H1047R) induces multipotency and multi-lineage mammary  
13 tumours. *Nature* **525**, 114-118 (2015).
- 14 25. Karar, J. & Maity, A. PI3K/AKT/mTOR Pathway in Angiogenesis. *Front Mol Neurosci*  
15 **4**, 51 (2011).
- 16 26. Lewis, P.W. *et al.* Inhibition of PRC2 activity by a gain-of-function H3 mutation found in  
17 pediatric glioblastoma. *Science* **340**, 857-861 (2013).
- 18 27. Funato, K., Major, T., Lewis, P.W., Allis, C.D. & Tabar, V. Use of human embryonic  
19 stem cells to model pediatric gliomas with H3.3K27M histone mutation. *Science* **346**,  
20 1529-1533 (2014).
- 21 28. Hindson, C.M. *et al.* Absolute quantification by droplet digital PCR versus analog real-  
22 time PCR. *Nat Methods* **10**, 1003-1005 (2013).

- 1 29. McKenna, A. *et al.* The Genome Analysis Toolkit: a MapReduce framework for  
2 analyzing next-generation DNA sequencing data. *Genome Res* **20**, 1297-1303 (2010).
- 3 30. Li, H. & Durbin, R. Fast and accurate short read alignment with Burrows-Wheeler  
4 transform. *Bioinformatics* **25**, 1754-1760 (2009).
- 5 31. Li, H. *et al.* The Sequence Alignment/Map format and SAMtools. *Bioinformatics* **25**,  
6 2078-2079 (2009).
- 7 32. Wang, K., Li, M. & Hakonarson, H. ANNOVAR: functional annotation of genetic  
8 variants from high-throughput sequencing data. *Nucleic Acids Res* **38**, e164 (2010).
- 9 33. Shi, Y. & Majewski, J. FishingCNV: a graphical software package for detecting rare  
10 copy number variations in exome-sequencing data. *Bioinformatics* **29**, 1461-1462 (2013).
- 11 34. Nadaf, J., Majewski, J. & Fahiminiya, S. ExomeAI: detection of recurrent allelic  
12 imbalance in tumors using whole-exome sequencing data. *Bioinformatics* **31**, 429-431  
13 (2015).
- 14 35. Deshwar, A.G. *et al.* PhyloWGS: reconstructing subclonal composition and evolution  
15 from whole-genome sequencing of tumors. *Genome Biol* **16**, 35 (2015).
- 16 36. Love, M.I., Huber, W. & Anders, S. Moderated estimation of fold change and dispersion  
17 for RNA-seq data with DESeq2. *Genome Biol* **15**, 550 (2014).
- 18 37. Dobin, A. *et al.* STAR: ultrafast universal RNA-seq aligner. *Bioinformatics* **29**, 15-21  
19 (2013).
- 20 38. Carbon, S. *et al.* AmiGO: online access to ontology and annotation data. *Bioinformatics*  
21 **25**, 288-289 (2009).
- 22 39. Huang da, W., Sherman, B.T. & Lempicki, R.A. Systematic and integrative analysis of  
23 large gene lists using DAVID bioinformatics resources. *Nat Protoc* **4**, 44-57 (2009).

1 **Acknowledgements**

2 The authors would like to express their sincere gratitude toward all the patients' families, as well  
3 as the staff at the McGill University and Genome Quebec Innovation Centre for excellent  
4 technical expertise, library preparation and sequencing. This work was performed within the  
5 context of the I-CHANGE consortium (International Childhood Astrocytoma inTegrated  
6 Genomics and Epigenomics consortium) and supported by funding from Genome Canada,  
7 Genome Quebec, The Institute for Cancer Research of the Canadian Institutes for Health  
8 Research (CIHR) McGill University and the Montreal Children's Hospital Foundation. It was  
9 also supported by UL1TR000075 and KL2TR000076 from the NIH National Center for  
10 Advancing Translational Sciences, The Smashing Walnuts Foundation (Middleburg, VA), The  
11 Zickler Family Foundation (Chevy Chase, MD), Goldwin Foundation (St. Lincoln, NE), The  
12 Piedmont Community Foundation (Middleburg, VA), The Musella Foundation (Hewlett, NY),  
13 The Mathew Larson Foundation (Franklin Lake, NJ), and Brain Tumor Foundation for Children  
14 (Atlanta, GA). N. Jabado is a member of the Penny Cole lab and the recipient of a Chair de  
15 Recherche from le Fond de Recherche en Sante au Quebec. J. Majewski holds a Canada  
16 Research Chair (tier 2). T. Gayden is supported by a studentship from the CIHR. D. Bechet is  
17 supported by a studentship from the T.D trust/Montreal Children's Hospital Foundation. E.  
18 Panditharatna is a predoctoral student in the Molecular Medicine Program of the Institute for  
19 Biomedical Sciences at the George Washington University. This work is from a dissertation to  
20 be presented to the above program in partial fulfillment of the requirements for the Ph.D. degree.

21

22

23



1

2 **Author contributions**

3 E.P., L.M., D.F., D.B. performed experiments, E.P., L.M., H.N., R.L., T.G., M.K., E.I.H., M.O.  
4 S.P.C., A.S., C.Y.H., J.K., N.J., J.N., J.M. analyzed the data and produced figures and tables,  
5 K.L.L., B.E., W.J.I., A.S.M., C.S., K.E.W., R.J.P. provided tissue samples. N.J., J.N. and J.M.  
6 provided project leadership and designed the study.

7

8 **Conflict of Interest**

9 The authors declare that they have no competing financial interests.

10

11

1 **Figure Legends**

2 **Figure 1.** Oncogenic alterations in 41 sub-regions from nine DIPG patients from whole exome  
3 sequencing data. Samples representing different anatomical locations within each patient are  
4 represented in columns. The mutations (in rows) were selected based on published datasets in  
5 pediatric glioblastoma and specifically DIPG. Mutations were divided into two subgroups; driver  
6 mutations which are essential for tumor initiation/maintenance and accessory driver mutations,  
7 which can further promote and accelerate tumor growth, but are not absolutely essential for  
8 tumor initiation or maintenance.

9  
10 **Figure 2. Selected examples of clonal evolution within DIPG tumors.** Left: histograms show  
11 the raw allele frequencies (whole exome sequencing data) for each somatic mutation in different  
12 autopsy regions within each tumor. Red: ubiquitous mutations across regions; yellow: mutations  
13 shared in at least two regions; blue: mutations seen in only one region. Right: Phylogenetic trees  
14 constructed from the mutation allele frequencies of deep amplicon sequencing data showing the  
15 order of evolution along with support probabilities (upper portions of graphs) and clonal mixing  
16 proportions within samples (lower portions). For clarity, only mutations selected to be likely  
17 oncogenic are shown. A) DIPG5: a rare case harboring both TP53 and PPM1D mutations, which  
18 are generally found to be mutually exclusive. PPM1D and TP53 mutations occur in distinct  
19 clones and are both secondary to H3K27M. ATRX is also secondary and subclonal. B) DIPG6:  
20 while it is impossible to resolve the order of H3/TP53/ATRX mutations' appearance, PIK3CA is  
21 clearly sub-clonal and appears in the later stages of evolution within this tumor. C) DIPG2: the  
22 H3.1 K27M and ACVR1 main driver mutations are ubiquitous, occur at similar frequencies  
23 across all samples, and their mutations order cannot be resolved. Conversely, other accessory

1 driver mutations are clearly secondary in order of appearance, and are present only in distinct  
2 subclones.

3

4 **Figure 3. Tumor spread in DIPG.** A) Tumor spread in DIPG2 in the thalamus, cerebellum and  
5 brain stem. Tumor extension in thalamus harbors secondary mutation PIK3CA, MAX, and  
6 PTEN which indicates late spread from both Pons 1 and Pons 2. Extension towards cerebellum is  
7 relatively early in the tumor evolution as it lacks secondary mutations found in the primary  
8 tumor and other brainstem spread. B) Evolution of tumor in patient DIPG3. Autopsy revealed  
9 two morphologically and histologically distinct regions of the tumor, indicated as DIPG3 Pons 1  
10 (low-grade) and DIPG3 Pons 2 (high-grade). Exome sequencing identified 11 SNVs and several  
11 large scale CNAs common to both regions. Shared alterations included H3.2 K27M and ACVR1  
12 G328V mutations that are likely the main driver mutations in this patient. The analysis also  
13 indicated a clear clonal substructure of the two regions, with 18 SNVs and 1 CNA found only in  
14 DIPG3 Pons 1, and 11 SNVs and 3 CNAs unique to DIPG3 Pons 2. Intriguingly, DIPG3 Pons 2  
15 carries the activating PIK3CA H1047R mutation, which occurs early in the evolution of this sub-  
16 clone judging by its high allelic frequency. PIK3CA H1047R is associated with multi-potency<sup>24</sup>  
17 and PI3K activation with angiogenesis and growth and this mutation likely contributes to tumor  
18 aggressiveness and high-grade features of Pons 2 compared to Pons 1 in DIPG3. *Scale bar 500*  
19 *μm.*
